# Supplementary material for: The ORP9-ORP11 dimer promotes sphingomyelin synthesis
Source: eLife. 2024 Aug 6;12:RP91345. doi: 10.7554/eLife.91345 (PMC11302984; doi:10.7554/eLife.91345)
Supplement: Supplementary file 1. [file elife-91345-supp1.xlsx]

## Sheet: 0
0
Sheet1	Overview of LTPs targeted in this library
Sheet2	List of short guide RNAs targeting LTPs and their location in the library

## Sheet: Sheet1
Sample.Roster	Target.Well.In.Library	LTP.Family	Target.Gene.Symbol	Target.Gene.ID	Target.Transcript	Ensembl.Gene.ID	Description	Uniprot.ID
1	A01	OSBP	OSBP	5007	NM_002556.2	ENSG00000110048	oxysterol binding protein [Source:HGNC Symbol;Acc:8503]	P22059
2	A02	OSBP	OSBPL1A	114876	NM_080597.3	ENSG00000141447	oxysterol binding protein-like 1A [Source:HGNC Symbol;Acc:16398]	Q9BXW6
3	A03	OSBP	OSBPL2	9885	NM_144498.2	ENSG00000130703	oxysterol binding protein-like 2 [Source:HGNC Symbol;Acc:15761]	Q9H1P3
4	A04	OSBP	OSBPL3	26031	NM_015550.3	ENSG00000070882	oxysterol binding protein-like 3 [Source:HGNC Symbol;Acc:16370]	Q9H4L5
5	A05	OSBP	OSBP2	23762	NM_030758.3	ENSG00000184792	oxysterol binding protein 2 [Source:HGNC Symbol;Acc:8504]	Q969R2
6	A06	OSBP	OSBPL5	114879	NM_020896.3	ENSG00000021762	oxysterol binding protein-like 5 [Source:HGNC Symbol;Acc:16392]	Q9H0X9
7	A07	OSBP	OSBPL6	114880	NM_032523.3	ENSG00000079156	oxysterol binding protein-like 6 [Source:HGNC Symbol;Acc:16388]	Q9BZF3
8	A08	OSBP	OSBPL7	114881	NM_145798.2	ENSG00000006025	oxysterol binding protein-like 7 [Source:HGNC Symbol;Acc:16387]	Q9BZF2
9	A09	OSBP	OSBPL8	114882	NM_020841.4	ENSG00000091039	oxysterol binding protein-like 8 [Source:HGNC Symbol;Acc:16396]	Q9BZF1
10	A10	OSBP	OSBPL9	114883	NM_024586.5	ENSG00000117859	oxysterol binding protein-like 9 [Source:HGNC Symbol;Acc:16386]	Q96SU4
11	A11	OSBP	OSBPL10	114884	NM_017784.4	ENSG00000144645	oxysterol binding protein-like 10 [Source:HGNC Symbol;Acc:16395]	Q9BXB5
12	A12	OSBP	OSBPL11	114885	NM_022776.4	ENSG00000144909	oxysterol binding protein-like 11 [Source:HGNC Symbol;Acc:16397]	Q9BXB4
13	B01	START	STAR	6770	NM_000349.2	ENSG00000147465	steroidogenic acute regulatory protein [Source:HGNC Symbol;Acc:11359]	P49675
14	B02	START	PCTP	58488	NM_021213.3	ENSG00000141179	phosphatidylcholine transfer protein [Source:HGNC Symbol;Acc:8752]	Q9UKL6
15	B03	START	STARD3	10948	NM_006804.3	ENSG00000131748	StAR-related lipid transfer (START) domain containing 3 [Source:HGNC Symbol;Acc:17579]	Q14849
16	B04	START	STARD4	134429	NM_139164.1	ENSG00000164211	StAR-related lipid transfer (START) domain containing 4 [Source:HGNC Symbol;Acc:18058]	Q96DR4
17	B05	START	STARD5	80765	NM_181900.2	ENSG00000172345	StAR-related lipid transfer (START) domain containing 5 [Source:HGNC Symbol;Acc:18065]	Q9NSY2
18	B06	START	STARD6	147323	NM_139171.1	ENSG00000174448	StAR related lipid transfer domain containing 6 [Source:HGNC Symbol;Acc:HGNC:18066]	P59095
19	B07	START	STARD7	56910	NM_020151.3	ENSG00000084090	StAR-related lipid transfer (START) domain containing 7 [Source:HGNC Symbol;Acc:18063]	Q9NQZ5
20	B08	START	STARD8	9754	NM_001142503.2	ENSG00000130052	StAR-related lipid transfer (START) domain containing 8 [Source:HGNC Symbol;Acc:19161]	Q92502
21	B09	START	STARD9	57519	NM_020759.2	ENSG00000159433	StAR-related lipid transfer (START) domain containing 9 [Source:HGNC Symbol;Acc:19162]	Q9P2P6
22	B10	START	STARD10	10809	NM_006645.2	ENSG00000214530	StAR-related lipid transfer (START) domain containing 10 [Source:HGNC Symbol;Acc:10666]	Q9Y365
23	B11	START	DLC1	10395	NM_006094.4	ENSG00000164741	deleted in liver cancer 1 [Source:HGNC Symbol;Acc:2897]	Q96QB1
24	B12	START	STARD13	90627	NM_178006.3	ENSG00000133121	StAR-related lipid transfer (START) domain containing 13 [Source:HGNC Symbol;Acc:19164]	Q9Y3M8
25	C01	START	ACOT11	26027	NM_015547.3	ENSG00000162390	acyl-CoA thioesterase 11 [Source:HGNC Symbol;Acc:18156]	Q8WXI4
26	C02	START	ACOT12	134526	NM_130767.2	ENSG00000172497	acyl-CoA thioesterase 12 [Source:HGNC Symbol;Acc:24436]	Q8WYK0
27	C03	NPC1 NTD	NPC1	4864	NM_000271.4	ENSG00000141458	Niemann-Pick disease, type C1 [Source:HGNC Symbol;Acc:7897]	O15118
28	C04	NPC1 NTD	NPC1L1	29881	NM_013389.2	ENSG00000015520	NPC1 (Niemann-Pick disease, type C1, gene)-like 1 [Source:HGNC Symbol;Acc:7898]	Q9UHC9
29	C05	ML	NPC2	10577	NM_006432.3	ENSG00000119655	Niemann-Pick disease, type C2 [Source:HGNC Symbol;Acc:14537]	P61916
30	C06	ML	LY86	9450	NM_004271.3	ENSG00000112799	lymphocyte antigen 86 [Source:HGNC Symbol;Acc:16837]	O95711
31	C07	ML	LY96	23643	NM_015364.4	ENSG00000154589	lymphocyte antigen 96 [Source:HGNC Symbol;Acc:17156]	Q9Y6Y9
32	C08	ML	GM2A	2760	NM_000405.4	ENSG00000196743	GM2 ganglioside activator [Source:HGNC Symbol;Acc:4367]	P17900
33	C09	PITP	PITPNM1	9600	NM_004910.2	ENSG00000110697	phosphatidylinositol transfer protein, membrane-associated 1 [Source:HGNC Symbol;Acc:9003]	O00562
34	C10	PITP	PITPNM2	57605	NM_020845.2	ENSG00000090975	phosphatidylinositol transfer protein, membrane-associated 2 [Source:HGNC Symbol;Acc:21044]	Q9BZ72
35	C11	PITP	PITPNC1	26207	NM_012417.3	ENSG00000154217	phosphatidylinositol transfer protein, cytoplasmic 1 [Source:HGNC Symbol;Acc:21045]	Q9UKF7
36	C12	PITP	PITPNB	23760	NM_001284278.1	ENSG00000180957	phosphatidylinositol transfer protein, beta [Source:HGNC Symbol;Acc:9002]	P48739
37	D01	PITP	PITPNA	5306	NM_006224.3	ENSG00000174238	phosphatidylinositol transfer protein, alpha [Source:HGNC Symbol;Acc:9001]	Q00169
38	D02	PITP	PITPNM3	83394	NM_031220.3	ENSG00000091622	PITPNM family member 3 [Source:HGNC Symbol;Acc:21043]	Q9BZ71
39	D03	SCP2	SCP2	6342	NM_002979.4	ENSG00000116171	sterol carrier protein 2 [Source:HGNC Symbol;Acc:10606]	P22307
40	D04	SCP2	SCP2D1	140856	NM_178483.2	ENSG00000132631	SCP2 sterol binding domain containing 1 [Source:HGNC Symbol;Acc:HGNC:16211]	Q9UJQ7
41	D05	SCP2	HSD17B4	3295	NM_000414.3	ENSG00000133835	hydroxysteroid (17-beta) dehydrogenase 4 [Source:HGNC Symbol;Acc:5213]	P51659
42	D06	SCP2	STOML1	9399	NM_001256672.1	ENSG00000067221	stomatin (EPB72)-like 1 [Source:HGNC Symbol;Acc:14560]	Q9UBI4
43	D07	SCP2	HSDL2	84263	NM_032303.4	ENSG00000119471	hydroxysteroid dehydrogenase like 2 [Source:HGNC Symbol;Acc:18572]	Q6YN16
44	D08	GLTP	CPTP	80772	NM_001029885.1	ENSG00000224051	glycolipid transfer protein domain containing 1 [Source:HGNC Symbol;Acc:28116]	Q5TA50
45	D09	GLTP	GLTPD2	388323	NM_001014985.2	ENSG00000182327	glycolipid transfer protein domain containing 2 [Source:HGNC Symbol;Acc:33756]	A6NH11
46	D10	GLTP	GLTP	51228	NM_016433.3	ENSG00000139433	glycolipid transfer protein [Source:HGNC Symbol;Acc:24867]	Q9NZD2
47	D11	GLTP	PLEKHA8	84725	NM_001197026.1	ENSG00000106086	pleckstrin homology domain containing, family A (phosphoinositide binding specific) member 8 [Source:HGNC Symbol;Acc:30037]	Q96JA3
48	D12	CRALTRIO	SEC14L1	6397	NM_001143998.1	ENSG00000129657	SEC14-like 1 (S. cerevisiae) [Source:HGNC Symbol;Acc:10698]	Q92503
49	E01	CRALTRIO	SEC14L2	23541	NM_001291932.1	ENSG00000100003	SEC14-like 2 (S. cerevisiae) [Source:HGNC Symbol;Acc:10699]	O76054
50	E02	CRALTRIO	SEC14L3	266629	NM_174975.4	ENSG00000100012	SEC14-like 3 (S. cerevisiae) [Source:HGNC Symbol;Acc:18655]	Q9UDX4
51	E03	CRALTRIO	SEC14L4	284904	NM_174977.3	ENSG00000133488	SEC14 like lipid binding 4 [Source:HGNC Symbol;Acc:HGNC:20627]	Q9UDX3
52	E04	CRALTRIO	SEC14L5	9717	NM_014692.1	ENSG00000103184	SEC14-like 5 (S. cerevisiae) [Source:HGNC Symbol;Acc:29032]	O43304
53	E05	CRALTRIO	SEC14L6	730005	NM_001193336.2	ENSG00000214491	SEC14 like lipid binding 6 [Source:HGNC Symbol;Acc:HGNC:40047]	B5MCN3
54	E06	CRALTRIO	MCF2L	23263	NM_024979.4	ENSG00000126217	MCF.2 cell line derived transforming sequence-like [Source:HGNC Symbol;Acc:14576]	O15068
55	E07	CRALTRIO	MCF2	4168	NM_005369.4	ENSG00000101977	MCF.2 cell line derived transforming sequence [Source:HGNC Symbol;Acc:6940]	P10911
56	E08	CRALTRIO	RLBP1	6017	NM_000326.4	ENSG00000140522	retinaldehyde binding protein 1 [Source:HGNC Symbol;Acc:10024]	P12271
57	E09	CRALTRIO	TTPA	7274	NM_000370.3	ENSG00000137561	tocopherol (alpha) transfer protein [Source:HGNC Symbol;Acc:12404]	P49638
58	E10	CRALTRIO	CLVS2	134829	NM_001010852.3	ENSG00000146352	clavesin 2 [Source:HGNC Symbol;Acc:HGNC:23046]	Q5SYC1
59	E11	CRALTRIO	CLVS1	157807	NM_173519.2	ENSG00000177182	clavesin 1 [Source:HGNC Symbol;Acc:23139]	Q8IUQ0
60	E12	CRALTRIO	TTPAL	79183	NM_001039199.2	ENSG00000124120	tocopherol (alpha) transfer protein-like [Source:HGNC Symbol;Acc:16114]	Q9BTX7
61	F01	CRALTRIO	NF1	4763	NM_000267.3	ENSG00000196712	neurofibromin 1 [Source:HGNC Symbol;Acc:7765]	P21359
62	F02	CRALTRIO	ARHGAP8	23779	NM_181335.2	ENSG00000241484	Rho GTPase activating protein 8 [Source:HGNC Symbol;Acc:677]	P85298
63	F03	CRALTRIO	ARHGAP1	392	NM_004308.3	ENSG00000175220	Rho GTPase activating protein 1 [Source:HGNC Symbol;Acc:673]	Q07960
64	F04	CRALTRIO	BNIP2	663	NM_004330.2	ENSG00000140299	BCL2/adenovirus E1B 19kDa interacting protein 2 [Source:HGNC Symbol;Acc:1083]	Q12982
65	F05	CRALTRIO	PRUNE2	158471	NM_015225.2	ENSG00000106772	prune homolog 2 (Drosophila) [Source:HGNC Symbol;Acc:25209]	Q8WUY3
66	F06	CRALTRIO	BNIPL	149428	NM_138278.3	ENSG00000163141	BCL2/adenovirus E1B 19kD interacting protein like [Source:HGNC Symbol;Acc:16976]	Q7Z465
67	F07	CRALTRIO	GDAP2	54834	NM_017686.3	ENSG00000196505	ganglioside induced differentiation associated protein 2 [Source:HGNC Symbol;Acc:18010]	Q9NXN4
68	F08	CRALTRIO	SESTD1	91404	NM_178123.4	ENSG00000187231	SEC14 and spectrin domains 1 [Source:HGNC Symbol;Acc:18379]	Q86VW0
69	F09	CRALTRIO	ATCAY	85300	NM_033064.4	ENSG00000167654	ataxia, cerebellar, Cayman type [Source:HGNC Symbol;Acc:779]	Q86WG3
70	F10	CRALTRIO	TRIO	7204	NM_007118.2	ENSG00000038382	triple functional domain (PTPRF interacting) [Source:HGNC Symbol;Acc:12303]	O75962
71	F11	CRALTRIO	PTPN9	5780	NM_002833.3	ENSG00000169410	protein tyrosine phosphatase, non-receptor type 9 [Source:HGNC Symbol;Acc:9661]	P43378
72	F12	CRALTRIO	MOSPD2	158747	NM_001177475.1	ENSG00000130150	motile sperm domain containing 2 [Source:HGNC Symbol;Acc:28381]	Q8NHP6
73	G01	CRALTRIO	MCF2L2	23101	NM_015078.3	ENSG00000053524	MCF.2 cell line derived transforming sequence-like 2 [Source:HGNC Symbol;Acc:30319]	Q86YR7
74	G02	CRALTRIO	KIAA1755	85449	NM_001029864.1	ENSG00000149633	KIAA1755 [Source:HGNC Symbol;Acc:29372]	Q5JYT7
75	G03	CRALTRIO	KALRN	8997	NM_001024660.3	ENSG00000160145	kalirin, RhoGEF kinase [Source:HGNC Symbol;Acc:4814]	O60229
76	G04	SMP	PDZD8	118987	NM_173791.4	ENSG00000165650	PDZ domain containing 8 [Source:HGNC Symbol;Acc:26974]	Q8NEN9
77	G05	SMP	ESYT2	57488	NM_020728.2	ENSG00000117868	extended synaptotagmin-like protein 2 [Source:HGNC Symbol;Acc:22211]	A0FGR8
78	G06	SMP	ESYT3	83850	NM_031913.3	ENSG00000158220	extended synaptotagmin-like protein 3 [Source:HGNC Symbol;Acc:24295]	A0FGR9
79	G07	SMP	ESYT1	23344	NM_015292.2	ENSG00000139641	extended synaptotagmin-like protein 1 [Source:HGNC Symbol;Acc:29534]	Q9BSJ8
80	G08	SMP	TEX2	55852	NM_018469.4	ENSG00000136478	testis expressed 2 [Source:HGNC Symbol;Acc:30884]	Q8IWB9
81	G09	SMP	C2CD2L	9854	NM_014807.4	ENSG00000172375	C2CD2-like [Source:HGNC Symbol;Acc:29000]	O14523
82	G10	SMP	C2CD2	25966	NM_015500.1	ENSG00000157617	C2 calcium-dependent domain containing 2 [Source:HGNC Symbol;Acc:1266]	Q9Y426
83	G11	ASTER/VAST	GRAMD1A	57655	NM_020895.3	ENSG00000089351	GRAM domain containing 1A [Source:HGNC Symbol;Acc:29305]	Q96CP6
84	G12	ASTER/VAST	GRAMD1B	57476	NM_020716.2	ENSG00000023171	GRAM domain containing 1B [Source:HGNC Symbol;Acc:29214]	Q3KR37
85	H01	ASTER/VAST	GRAMD1C	54762	NM_017577.4	ENSG00000178075	GRAM domain containing 1C [Source:HGNC Symbol;Acc:25252]	Q8IYS0
86	H02	VPS13	VPS13A	23230	NM_033305.2	ENSG00000197969	vacuolar protein sorting 13 homolog A (S. cerevisiae) [Source:HGNC Symbol;Acc:1908]	Q96RL7
87	H03	VPS13	VPS13B	157680	NM_017890.4	ENSG00000132549	vacuolar protein sorting 13 homolog B (yeast) [Source:HGNC Symbol;Acc:2183]	Q7Z7G8
88	H04	VPS13	VPS13C	54832	NM_017684.4	ENSG00000129003	vacuolar protein sorting 13 homolog C (S. cerevisiae) [Source:HGNC Symbol;Acc:23594]	Q709C8
89	H05	VPS13	VPS13D	55187	NM_015378.3	ENSG00000048707	vacuolar protein sorting 13 homolog D (S. cerevisiae) [Source:HGNC Symbol;Acc:23595]	Q5THJ4
90	H06	START	COL4A3BP	10087	NM_005713.2	ENSG00000113163	collagen, type IV, alpha 3 (Goodpasture antigen) binding protein [Source:HGNC Symbol;Acc:2205]	Q9Y5P4
91	H07		NonTarget_1	NT_1		NA	NA
92	H08		NonTarget_2	NT_2		NA	NA
93	H09		NonTarget_3	NT_3		NA	NA
94	H10		NonTarget_4	NT_4		NA	NA
95	H11		NonTarget_5	NT_5		NA	NA
96	H12		NonTarget_6	NT_6		NA	NA

## Sheet: Sheet2
Guide.Name	Guide.Seq	Target.Well.In.Library
OSBP_g1	AATGACTTGATAGCTAAGCA	A01
OSBP_g2	CGTACTGGCAGCAATATCAG	A01
OSBP_g3	GCAAGAACCTTACCGGCATG	A01
OSBPL1A_g1	AAAGCATTGAAACGATATGA	A02
OSBPL1A_g2	AATGATTAAGGAGTGTGACA	A02
OSBPL1A_g3	CCTGACTCAAGCAGTATGCA	A02
OSBPL2_g1	AAATGGACGGAATGTTTGTG	A03
OSBPL2_g2	AAGTCGCTTCTGCTGAACAT	A03
OSBPL2_g3	GCTTCCCGATGATGACGTTG	A03
OSBPL3_g1	CATGTAACTTACGGATGACA	A04
OSBPL3_g2	CCTGAGGAACAACATCGGGA	A04
OSBPL3_g3	GGAGCTGGCTCATTTCTACC	A04
OSBP2_g1	AACTAGCAGAGATACACAGT	A05
OSBP2_g2	CACCGCGCACATTGACACGG	A05
OSBP2_g3	TAGCACCGGGACAAGTTCCG	A05
OSBPL5_g1	CGAACGTGGGTAGCACCACG	A06
OSBPL5_g2	GCTCATCTACAAGACGCCCA	A06
OSBPL5_g3	GCTCTGCTATGTAGAATGTG	A06
OSBPL6_g1	ACAAGCGGGTCACAAGACGA	A07
OSBPL6_g2	AGAATGCTGAACTAAGGAGT	A07
OSBPL6_g3	CAGAAACCAGACAAACATGA	A07
OSBPL7_g1	CAGGTACCATGCGCTCGCAG	A08
OSBPL7_g2	CTGGTGTGTGGGGATAACAG	A08
OSBPL7_g3	GGAGCTGAAAGAGTCCGCCG	A08
OSBPL8_g1	CGTGCTAACAATCTCCACAG	A09
OSBPL8_g2	CTATTGAAACAAGTCCGTCC	A09
OSBPL8_g3	TCAGCCATAACAATAACAGA	A09
OSBPL9_g1	ATGATGAGAGGCTCTCGCAG	A10
OSBPL9_g2	GGAGGTAACACAGTCTGGGA	A10
OSBPL9_g3	TATTTGGAGACAAGTTCACG	A10
OSBPL10_g1	ATGCGTGATTGTGACAACAC	A11
OSBPL10_g2	GAAATGTCTCGCCTATGATG	A11
OSBPL10_g3	GGAGAGATGTTTAAACTGAG	A11
OSBPL11_g1	AGAATCTGGACTATTAGCGA	A12
OSBPL11_g2	AGTATACCAACCTTGTCACT	A12
OSBPL11_g3	CATCAGGAACGACAATCGAG	A12
STAR_g1	CGCACGCTCACAAAGTCACG	B01
STAR_g2	CTGGTTAATCCACGTGCTAG	B01
STAR_g3	GGGCATCCTTAGCAACCAAG	B01
PCTP_g1	AGTATGTCTACCTTCGGCAG	B02
PCTP_g2	CTCCACTAGGAGCTGCCAGT	B02
PCTP_g3	CTCTATGAACAAGAATGCAA	B02
STARD3_g1	CATCCGTAAGAACTTGGAGC	B03
STARD3_g2	GAGCGGGAGTACATCCGCCA	B03
STARD3_g3	GGTGCGGCGGACATCAGAGA	B03
STARD4_g1	CTGTCCCAATCCAAACGACA	B04
STARD4_g2	GAAATCAACAAATTCTCTTG	B04
STARD4_g3	GGTCTATTATACTATAGACA	B04
STARD5_g1	GACATAACGGATGCTCCACA	B05
STARD5_g2	GGAGGTTCTGCTTACACACA	B05
STARD5_g3	TGGAGGCCTACGAGTGAAGT	B05
STARD6_g1	AAATCTCTTAGCTAAAAGTG	B06
STARD6_g2	AAGTGTATAATATGGTACAC	B06
STARD6_g3	ACTGTAGATATCGTGTTGAA	B06
STARD7_g1	ATAAGAAACACTTTAAGCTG	B07
STARD7_g2	CCTACACAGATGTGACACCT	B07
STARD7_g3	CTCGTCCCAAACGAAGACGC	B07
STARD8_g1	AACAAGACCCCAGATTACCG	B08
STARD8_g2	AGAGGAAGCCACGACAACTG	B08
STARD8_g3	AGGTGGCACTAAGCTCGGTG	B08
STARD9_g1	ACAGTGTGGACATCAACAGG	B09
STARD9_g2	GAGGACGTCGGACTGACCAG	B09
STARD9_g3	TGAGCCCAAAGATGTTAACA	B09
STARD10_g1	CGTCAGCGTTGACTGTCAAG	B10
STARD10_g2	GCTACCTCATCCAGAGCACA	B10
STARD10_g3	GCTCGGACCAAGTCTTTCCG	B10
DLC1_g1	CAGAGCCGTTATTCCCCGAG	B11
DLC1_g2	GATCCAAACAATGGTTCCGG	B11
DLC1_g3	TGATGACGGAGTTAGTCCGG	B11
STARD13_g1	AAACGCATGGAAACACTCCG	B12
STARD13_g2	ACTGCAAACTCATGATACAT	B12
STARD13_g3	CTCTACACGCTGCTCCCTCG	B12
ACOT11_g1	AGCTGAAGCAGATCACGCCG	C01
ACOT11_g2	ATCTGCGTCCAGGACCACAA	C01
ACOT11_g3	GCCAACTGCGCCATTCAGGG	C01
ACOT12_g1	AGCATTCAGCACAAGCATGG	C02
ACOT12_g2	CCACCCCATGCAAACCATCA	C02
ACOT12_g3	GATGATTTCAGACGCTATCG	C02
NPC1_g1	AAAGAGTTACAATACTACGT	C03
NPC1_g2	ACGCCATGTATGTCATCATG	C03
NPC1_g3	CAAACTTGTATCATTCAGAG	C03
NPC1L1_g1	AGAACTCACTACGGACCCCG	C04
NPC1L1_g2	AGAGCCATACACGCCACACA	C04
NPC1L1_g3	CCTCAACAATTACCCTGCCG	C04
NPC2_g1	CAACCCTGCCAGCTGAGCAA	C05
NPC2_g2	CCGGTGCAGTTCAAGGACTG	C05
NPC2_g3	GAGCCTGATGGTTGTAAGAG	C05
LY86_g1	AGCCGCCTCACAGATGGGAT	C06
LY86_g2	AGCCTTGAGACATGAGAGCT	C06
LY86_g3	CACGTGGTCTGTAGCGACAG	C06
LY96_g1	AGTAATCGTCATCAGATCCT	C07
LY96_g2	AGTATTTCATACACCTACTG	C07
LY96_g3	GAAAATGTGCAATAATCCTT	C07
GM2A_g1	GGTGCTGCCCATGACACTGA	C08
GM2A_g2	TCAGGCTTCTGATCACCGCA	C08
GM2A_g3	TGACATGTTAATTCCTACTG	C08
PITPNM1_g1	CACACACAAGGTGTACCACG	C09
PITPNM1_g2	TACTGACCATGCTCCCACGG	C09
PITPNM1_g3	TCAACACCCACCTCTACTAG	C09
PITPNM2_g1	AGTCAACCAAGACCCAGCGG	C10
PITPNM2_g2	CATGACGGTGTCGAACACGT	C10
PITPNM2_g3	GTGAAGCTGACGGGTCCGCG	C10
PITPNC1_g1	ACAACAGCTCTAGCCCAACT	C11
PITPNC1_g2	AGCCATGAACAGAGTGACCG	C11
PITPNC1_g3	AGTGGAACAATTTGTACACA	C11
PITPNB_g1	ATGGTTTAGATCCAAACACA	C12
PITPNB_g2	GAAGCTAGTAAGAATGAGAC	C12
PITPNB_g3	GCTTACTTGTTCTACAGTAG	C12
PITPNA_g1	AATGAGCCCTACGAGAAGGA	D01
PITPNA_g2	CAAACCAGATCTTGGCACGC	D01
PITPNA_g3	GCCAGCATTCGAACAAACGT	D01
PITPNM3_g1	AGTCCCCGATGAGACACACC	D02
PITPNM3_g2	GCAACATTGACATCTCCAGT	D02
PITPNM3_g3	GCGGACTCAGGTCAAGCTGA	D02
SCP2_g1	ACAGATCCCTTATTCAGCAG	D03
SCP2_g2	CAAACATCTGAGGAGCAACT	D03
SCP2_g3	TGGCCTGCAATCCAAAGCTG	D03
SCP2D1_g1	ACCTCGAACTGGCCCACCAG	D04
SCP2D1_g2	CAGCTCTAGAGGATGTGGCA	D04
SCP2D1_g3	GCCTAATGTCCTGAAACACT	D04
HSD17B4_g1	AACTCTCGTGACAAAGCCAA	D05
HSD17B4_g2	ACGGACATCAGACAAAGTCA	D05
HSD17B4_g3	ATCCATAATAATCACTACAC	D05
STOML1_g1	AACTGATGAGGCCATGACAG	D06
STOML1_g2	AGATTGTGCCCACCTACGAG	D06
STOML1_g3	CCAGATGCGAAACTGGACAT	D06
HSDL2_g1	CACATCAACAATACATGGCA	D07
HSDL2_g2	GACGTTTATGCAATTAAACC	D07
HSDL2_g3	GCTGCTATGGATATGCTGGG	D07
CPTP_g1	CGGAGGTGCGTGCGTCCTCG	D08
CPTP_g2	CGGATCATGGAGCGCCTCAG	D08
CPTP_g3	TCCGGCAGCCAGACTCCGGG	D08
GLTPD2_g1	AAGGCGAAGACGGAGCCGAG	D09
GLTPD2_g2	ACGCCAGTCTGAAACCCGAA	D09
GLTPD2_g3	AGCAGCGCGAAGATAGCGAG	D09
GLTP_g1	AGACATAAGCGGCAACATCA	D10
GLTP_g2	AGCAGAGTGGCCCAAAGTAG	D10
GLTP_g3	CATCCGTGTCAACGCCACCA	D10
PLEKHA8_g1	AGTCCAAGGTGAAATAAGGA	D11
PLEKHA8_g2	GTGTGGCTGAAAGACAGCGG	D11
PLEKHA8_g3	TATTATCTACAGAATGAACT	D11
SEC14L1_g1	ATGGAAGGCGGACTCCAACG	D12
SEC14L1_g2	CTCCCGCGTAGTAATCCTGA	D12
SEC14L1_g3	TATTAAAATCCCGTGCACGG	D12
SEC14L2_g1	CACCATAATTTATGACTGCG	E01
SEC14L2_g2	GATCCAACAGTATCTGTCAG	E01
SEC14L2_g3	TCTTACGAGTGTCCTCACTC	E01
SEC14L3_g1	CAATGATGTCATACCACACG	E02
SEC14L3_g2	GAACCCCAAATGTTTAACCA	E02
SEC14L3_g3	GCTGAAACTCATCAGTCCTG	E02
SEC14L4_g1	CACCCACAGATCAACTATGG	E03
SEC14L4_g2	CTTTGTGGCTACGACTACGA	E03
SEC14L4_g3	GGTCAAGTCGTTCATGAGTG	E03
SEC14L5_g1	CATACTGACCGCCTCCAGAG	E04
SEC14L5_g2	CCAGGTTCTCTCCGTCAACG	E04
SEC14L5_g3	GTACCTCGCACATTCCGCGC	E04
SEC14L6_g1	AGAAATCAGAGGACATGCTG	E05
SEC14L6_g2	AGGAAGGTGGTGATTCTCGG	E05
SEC14L6_g3	CATATGCGGCCACGACGGTG	E05
MCF2L_g1	CAGGACGGACGCCTTCACGG	E06
MCF2L_g2	CATTGGGAACAAGCACTACG	E06
MCF2L_g3	CGATAAGTCGCAGCTGACCG	E06
MCF2_g1	GTATCAGTTCATTTAGTACG	E07
MCF2_g2	GTTCAAGACTAGAATGTCAT	E07
MCF2_g3	TCCATGTAATATCACAAACT	E07
RLBP1_g1	CAGCTCACAACCAAGGACCA	E08
RLBP1_g2	CATACTTGTCCCGACTAGAG	E08
RLBP1_g3	CGCGCACGGAAGTTCAACGT	E08
TTPA_g1	ATAAGAACTTTGCTGCCAGT	E09
TTPA_g2	CAGGTCCAGATCGAAATCCC	E09
TTPA_g3	CATAAGCTGTAAAAACTTTG	E09
CLVS2_g1	GGATATGGTCATCACCAGGC	E10
CLVS2_g2	TACAGGGCATGGATATACCA	E10
CLVS2_g3	TGGCGCAGTACTTTGAGTAC	E10
CLVS1_g1	AAAACCGAGACCATTACGGC	E11
CLVS1_g2	CCAGTACCGCCAGCTAAACC	E11
CLVS1_g3	TAGAGGGCATGAATGTACCA	E11
TTPAL_g1	AATTACAATTCCATTCACCT	E12
TTPAL_g2	AGTGAGCACACATAGCCCGG	E12
TTPAL_g3	CCGCAAGTTTGATTACGACC	E12
NF1_g1	CATGAGACCACTGTCTACGT	F01
NF1_g2	CCACCACCTAGAATCGAAAG	F01
NF1_g3	GAGGAAGCAGATATCCGGTG	F01
ARHGAP8_g1	ACTTACCGCAAAACTTCGGG	F02
ARHGAP8_g2	AGTGTGTACTTCAAATACCT	F02
ARHGAP8_g3	CCACCAAGACACCACCGCCG	F02
ARHGAP1_g1	CAGGTGTGTGACAAGTTCCG	F03
ARHGAP1_g2	CCTCGCCAAGTGCTCAAGTG	F03
ARHGAP1_g3	CTTGCGGTCAAACTCCCGGT	F03
BNIP2_g1	AACTCATTACTATTCTCTGA	F04
BNIP2_g2	CGGGATGTTATCACTTCCGC	F04
BNIP2_g3	GGTCTCCACCGCCGACCGAG	F04
PRUNE2_g1	AGTGGGCCATGGCAAAAAGT	F05
PRUNE2_g2	CACAGCCTTTACTCACGCAG	F05
PRUNE2_g3	TCCCCAAAATCAAGACTTCG	F05
BNIPL_g1	AAGAAAGTCCTGTCTCATGG	F06
BNIPL_g2	GAGAAGATGGACATCACTGG	F06
BNIPL_g3	GATGAACTACCCCGGGCAGA	F06
GDAP2_g1	AAGGATTCAATCTAGCTGCC	F07
GDAP2_g2	CCTTCAGGGACAATTATCAG	F07
GDAP2_g3	GTCATCAATTCTGCAAAACG	F07
SESTD1_g1	ATTTAATGGCTCAGACGGAG	F08
SESTD1_g2	GGACTGGTTAAATAAGAGGC	F08
SESTD1_g3	GTCACCTTGGAATGCTGAGT	F08
ATCAY_g1	ATTTGGGGACGGCACGACGG	F09
ATCAY_g2	CCAGCGAGTCGGTCTCATCG	F09
ATCAY_g3	GCCTTCGCCGTAGTACCCTG	F09
TRIO_g1	AACGAGCTGACCATCCGACG	F10
TRIO_g2	AGAGAAGGGAATTATCCGAA	F10
TRIO_g3	ATGGTGTAAAGCTTGCGGTG	F10
PTPN9_g1	ACATGTTGGACTGACTTGTG	F11
PTPN9_g2	CATCAAACTTCCTTGCCATG	F11
PTPN9_g3	CTGAGGATCTCAGAACGAAG	F11
MOSPD2_g1	ACTTACAGTTCCACCCATGT	F12
MOSPD2_g2	ATTACCTGATGTGTAGTAAG	F12
MOSPD2_g3	GAATGGGCCTATTACCAGTG	F12
MCF2L2_g1	AAAGGTCAGCCAATGGTGTG	G01
MCF2L2_g2	GAAGCATTACCTTTGCATCG	G01
MCF2L2_g3	GAGACAGAGTTGAACTCCCG	G01
KIAA1755_g1	ACACTGCCTCTTCTTACACG	G02
KIAA1755_g2	CCAACCGAGCCAAATCTTTG	G02
KIAA1755_g3	CCTGCTACAAGCTTCCATCG	G02
KALRN_g1	AAGCAGAAGAAAGTTCGCGA	G03
KALRN_g2	CTTTGAGCAGTACACCATCG	G03
KALRN_g3	GCAGAATACGTACACCAATG	G03
PDZD8_g1	AAGTAGCAAGTCTCCCGCGT	G04
PDZD8_g2	ATGCCTAGCTACATCAAACA	G04
PDZD8_g3	CAAGTGTCAAAACCAACCCA	G04
ESYT2_g1	AAACTATAGAACCAGCCGTG	G05
ESYT2_g2	AAGGGCATATCTCCAATCAA	G05
ESYT2_g3	AGGAGAACCTCAGTCCAAAG	G05
ESYT3_g1	GAGCTGCAGAAGATTCAGGC	G06
ESYT3_g2	GTCCTGAATGACACAACCAG	G06
ESYT3_g3	TGGTGGCGCAGGAACCGCCG	G06
ESYT1_g1	ACAGTGGGGAGAGACTTATG	G07
ESYT1_g2	CAGGACAACCAGGCACCGTG	G07
ESYT1_g3	GCACATCACCTACATAGCTG	G07
TEX2_g1	ACACTGGGAGAGCTAGCTAA	G08
TEX2_g2	AGAGTCCACTCACATAGTGG	G08
TEX2_g3	ATGACCAAAGCATTGTAACA	G08
C2CD2L_g1	AGACCAATCTGAGCATACCA	G09
C2CD2L_g2	AGGCGAAGAGTGACGCCAGG	G09
C2CD2L_g3	GACCGGACCATCATGCCCGA	G09
C2CD2_g1	AAAAATAGAAAAGGACCGCA	G10
C2CD2_g2	AAACACTCCGGACCTCATGT	G10
C2CD2_g3	ATATCCAGCCCAAAGCACTG	G10
GRAMD1A_g1	CACTGGGCAGCAGATCCAAG	G11
GRAMD1A_g2	CATTACGCTGCTTATAAGTG	G11
GRAMD1A_g3	CTGCAGACGCTGTTCCGGCG	G11
GRAMD1B_g1	AACATCCACAGGGAGCAGTG	G12
GRAMD1B_g2	AGTCATGGTAGGGCACGTCG	G12
GRAMD1B_g3	GCCTTCTATGAGGACCTGAG	G12
GRAMD1C_g1	AAACTTGTCACTGTCGATTG	H01
GRAMD1C_g2	ACTATTAAGGACTATAGTGT	H01
GRAMD1C_g3	CACATCTACCTGATACAGAG	H01
VPS13A_g1	AATGGAAGACCTGTTAACGC	H02
VPS13A_g2	ATTAGTAGTAACTCCACTAG	H02
VPS13A_g3	TATGGATTATATCCGAACCA	H02
VPS13B_g1	GAAACCTCATCTCGCTACAG	H03
VPS13B_g2	GCTGATGGGTCGAACCAACA	H03
VPS13B_g3	TGCAACCCATAGGTTCCACT	H03
VPS13C_g1	AGAAAGGTTGCACTGAAACG	H04
VPS13C_g2	GAGAACATTTGACTTAACTG	H04
VPS13C_g3	TAAATTTGAAACCAATCCGG	H04
VPS13D_g1	AAGGGGCGATCAACAAACCG	H05
VPS13D_g2	ACATCCGAGAGAATACTCGA	H05
VPS13D_g3	AGAGAACGGTTCACTACCAG	H05
COL4A3BP_g1	CCAACTTCTCACGTAAACTG	H06
COL4A3BP_g2	GAAGAAAAGGCATCTCCAGA	H06
COL4A3BP_g3	GGACAAACTACATTCATGGG	H06
NonTarget_1_g1	AAAAAGCTTCCGCCTGATGG	H07
NonTarget_1_g2	AAAACAGGACGATGTGCGGC	H07
NonTarget_1_g3	AAAACATCGACCGAAAGCGT	H07
NonTarget_2_g1	AAAATAGCAGTAAACTCAAC	H08
NonTarget_2_g2	AAAATCGATGGGCTGAATCT	H08
NonTarget_2_g3	AAAATTATCGGAAACGGTAG	H08
NonTarget_3_g1	AAACCCTATGCCCAAATGAG	H09
NonTarget_3_g2	AAACCTAGCCCCAATACTTA	H09
NonTarget_3_g3	AAACGAGATCGAGAAAGGTA	H09
NonTarget_4_g1	AAACGGTACGACAGCGTGTG	H10
NonTarget_4_g2	AAACTGTAGTGCAGGGTCAG	H10
NonTarget_4_g3	AAAGAAAGAGGAATAGTAGC	H10
NonTarget_5_g1	AAAGACTTGCTCCAAAACAC	H11
NonTarget_5_g2	AAAGATATAGCAAATTATGG	H11
NonTarget_5_g3	AAAGCGACGTAGGCATACTT	H11
NonTarget_6_g1	AAATAATATGCATCTCTCGA	H12
NonTarget_6_g2	AAATACAAGCTATAGCGATA	H12
NonTarget_6_g3	AAATGCACAGATCGCTGATC	H12
