# Supplementary material for: The ORP9-ORP11 dimer promotes sphingomyelin synthesis
Source: eLife. 2024 Aug 6;12:RP91345. doi: 10.7554/eLife.91345 (PMC11302984; doi:10.7554/eLife.91345)
Supplement: Supplementary file 2. [file elife-91345-supp2.xlsx]

## Sheet: Sheet 0
Sheet 1	Lipid Classes Summary	Z-scores and average percentages for lipid classes in each LTP knockout cells
	Sample Roster	Sample roster from the LTP list (see supplementary table 1)
	Target Gene Symbol
	Lipid Class
	Zscore Mean	Mean z-score of an LTP
	Zscore sd	Standard deviation of z-score of an LTP
	Percentage Mean	Mean % of the detected lipid class
	Percentage sd	Standard deviation of the % of the detected lipid class
Sheet 2	Lipid Classes Percentages	Percentage of lipid classes detected in individual measurements for LTPs
	SampleRoster	Sample roster from the LTP list (see supplementary table 1)
	SampleID
	LipidClass
	Percentage	Percentage of the detected lipid in total detected lipids
	Lipidomics.Round	Refers to the biological replicate for the lipidomics measurement
	Target Gene Symbol
	ColumnNo	Column corresponding to the LTP library design (see ST1)
	RowNo	Row corresponding to the LTP library design (see ST1)
	Zscore	Calculated Z-score
	Control	Boolean for control samples
Sheet 3	Lipid Species Amounts	Amount of individual lipid subspecies detected in individual measurements
	SampleRoster	Sample roster from the LTP list (see supplementary table 1)
	SampleID
	TargetGeneSymbol
	LipidClass
	LipidSpecies	Sub-species of the detected lipid
	Amount (nmol)

## Sheet: Lipid Classes Summary
Sample Roster	Target Gene Symbol	Lipid Class	Zscore Mean	Zscore sd	Percentage Mean	Percentage sd
1	OSBP	CE	0.566313	2.50285	3.24923	1.77014
1	OSBP	CER	0.299588	3.09525	0.456085	0.257116
1	OSBP	DAG	0.713001	0.354399	3.03841	0.302065
1	OSBP	DCER	-0.417565	1.17354	0.0571151	0.030161
1	OSBP	FFA	1.66911	1.52782	11.4846	7.26559
1	OSBP	HCER	-0.726261	0.516336	1.21005	0.115597
1	OSBP	LCER	1.32404	1.95269	0.558305	0.364454
1	OSBP	LPC	0.263148	2.01939	0.165309	0.0320246
1	OSBP	LPE	-1.65912	0.685072	0.102332	0.00333846
1	OSBP	PA	0.00347138	0.897966	0.514934	0.170903
1	OSBP	PC	-1.77998	0.70001	32.1379	0.908257
1	OSBP	PE	-0.819043	1.04779	19.6791	3.25162
1	OSBP	PG	1.194	0.169838	0.946944	0.080075
1	OSBP	PI	0.09727	0.995595	10.3028	1.62824
1	OSBP	PS	-0.554527	2.85954	4.17847	1.67121
1	OSBP	SM	-1.67724	0.789956	5.27885	0.982409
1	OSBP	TAG	1.78371	4.45077	6.63958	6.1065
2	OSBPL1A	CE	1.07998	0.999865	3.15967	0.183119
2	OSBPL1A	CER	0.200193	0.281522	0.413829	0.0389415
2	OSBPL1A	DAG	0.734084	0.816527	2.92294	0.307898
2	OSBPL1A	DCER	-0.0928995	1.06981	0.0486912	0.00631376
2	OSBPL1A	FFA	-0.260021	0.624565	6.80761	1.13324
2	OSBPL1A	HCER	0.273139	0.4513	1.37943	0.0186342
2	OSBPL1A	LCER	-0.353528	0.303654	0.317874	0.075711
2	OSBPL1A	LPC	-0.339955	0.970158	0.231752	0.0456518
2	OSBPL1A	LPE	-0.806823	0.58407	0.160179	0.0643175
2	OSBPL1A	PA	0.165429	0.655429	0.779697	0.501339
2	OSBPL1A	PC	0.66399	0.219166	38.7466	1.87644
2	OSBPL1A	PE	-0.487408	0.665258	20.0959	0.450278
2	OSBPL1A	PG	-0.340263	0.426755	0.824148	0.0757534
2	OSBPL1A	PI	-0.0942076	1.28765	9.90316	2.21231
2	OSBPL1A	PS	0.326856	1.24837	4.87072	0.23405
2	OSBPL1A	SM	-0.024329	0.243922	6.31196	0.423629
2	OSBPL1A	TAG	-0.733074	0.171281	3.0259	0.463662
3	OSBPL2	CE	0.280112	0.204417	2.8205	0.345925
3	OSBPL2	CER	-0.742284	0.0586956	0.340222	0.0294459
3	OSBPL2	DAG	0.18719	0.617768	2.75379	0.337782
3	OSBPL2	DCER	-0.248305	1.25097	0.0468674	0.008542
3	OSBPL2	FFA	-0.096568	0.31008	7.01156	1.49141
3	OSBPL2	HCER	-0.450765	0.103614	1.21919	0.0482544
3	OSBPL2	LCER	-1.30866	0.673875	0.252061	0.00909354
3	OSBPL2	LPC	0.229767	0.847378	0.269862	0.0466177
3	OSBPL2	LPE	-0.466118	0.0689203	0.170742	0.0474556
3	OSBPL2	PA	0.352171	0.241307	0.787752	0.449459
3	OSBPL2	PC	0.455904	0.665655	38.1469	0.228246
3	OSBPL2	PE	0.0498324	0.720381	21.4615	0.61861
3	OSBPL2	PG	0.0563459	0.294887	0.866354	0.0646018
3	OSBPL2	PI	-0.668746	0.957088	9.34228	1.98617
3	OSBPL2	PS	-0.182277	1.18236	4.57176	0.233434
3	OSBPL2	SM	-0.466134	0.525606	6.01761	0.212538
3	OSBPL2	TAG	0.37481	1.37768	3.92105	0.328591
4	OSBPL3	CE	0.738828	0.587648	3.00628	0.0136313
4	OSBPL3	CER	-0.0966404	0.246183	0.390496	0.0387075
4	OSBPL3	DAG	0.901378	0.32924	3.01198	0.685475
4	OSBPL3	DCER	-0.389004	1.32959	0.0453039	0.0096593
4	OSBPL3	FFA	-0.741404	0.368955	6.35239	1.27319
4	OSBPL3	HCER	0.61413	0.241224	1.46165	0.142643
4	OSBPL3	LCER	-1.22799	0.552483	0.257588	0.0174279
4	OSBPL3	LPC	-0.756372	0.0295338	0.194913	0.0298647
4	OSBPL3	LPE	-1.14562	0.160059	0.138211	0.0247978
4	OSBPL3	PA	0.166806	0.79401	0.788599	0.526675
4	OSBPL3	PC	0.076255	0.694008	37.4485	2.8198
4	OSBPL3	PE	0.506179	0.0136691	22.6009	1.22122
4	OSBPL3	PG	-0.782125	0.487994	0.776796	0.0789506
4	OSBPL3	PI	-0.834363	0.466691	9.22039	1.51238
4	OSBPL3	PS	0.0208067	0.0655299	4.73915	0.520784
4	OSBPL3	SM	-0.0647452	0.00679848	6.29423	0.58266
4	OSBPL3	TAG	-0.558857	0.162739	3.27262	0.877616
5	OSBP2	CE	0.137898	0.403276	2.68943	0.0150379
5	OSBP2	CER	-0.249296	0.427133	0.377637	0.0543418
5	OSBP2	DAG	0.0557051	0.688502	2.75204	0.748325
5	OSBP2	DCER	-0.66248	0.0965132	0.0438847	0.00480981
5	OSBP2	FFA	-0.200854	0.391132	6.89615	1.3838
5	OSBP2	HCER	-0.35168	0.0321017	1.24206	0.0659134
5	OSBP2	LCER	-0.799212	0.0240732	0.28706	0.0535806
5	OSBP2	LPC	-0.407476	0.4691	0.222983	0.0101308
5	OSBP2	LPE	-1.30281	0.0984805	0.133528	0.0335122
5	OSBP2	PA	0.00263676	1.00671	0.772068	0.544799
5	OSBP2	PC	0.495446	0.299056	38.3669	2.01662
5	OSBP2	PE	0.0450158	0.143782	21.434	0.845764
5	OSBP2	PG	-1.15684	0.697479	0.737246	0.0986297
5	OSBP2	PI	-0.0542273	0.4187	10.032	1.30563
5	OSBP2	PS	-0.627033	1.08788	4.31199	0.211097
5	OSBP2	SM	-0.576195	0.0706341	5.96646	0.589803
5	OSBP2	TAG	0.104813	0.927158	3.73456	0.0254301
6	OSBPL5	CE	-0.65943	0.12657	2.27179	0.00085599
6	OSBPL5	CER	-0.904203	0.433959	0.325791	0.0605343
6	OSBPL5	DAG	0.440041	0.219773	2.84714	0.480981
6	OSBPL5	DCER	-1.4104	0.313892	0.0362251	0.00556619
6	OSBPL5	FFA	1.45579	0.303564	8.65651	2.49386
6	OSBPL5	HCER	-0.113766	0.463664	1.29952	0.181272
6	OSBPL5	LCER	-1.13869	0.342288	0.263644	0.0319411
6	OSBPL5	LPC	1.15206	0.110185	0.327115	0.0112078
6	OSBPL5	LPE	0.00992625	0.261243	0.193824	0.0647585
6	OSBPL5	PA	-1.3457	0.0919673	0.470123	0.210341
6	OSBPL5	PC	-0.214991	0.265374	36.6463	0.520296
6	OSBPL5	PE	0.168575	0.0227475	21.7434	1.2621
6	OSBPL5	PG	-0.508972	0.0887136	0.804679	0.0380501
6	OSBPL5	PI	0.0836065	0.660349	10.2832	0.161952
6	OSBPL5	PS	-0.288072	0.394261	4.53889	0.225204
6	OSBPL5	SM	-0.539741	0.0139646	5.98715	0.537661
6	OSBPL5	TAG	-0.486075	0.0487916	3.30466	0.689553
7	OSBPL6	CE	-0.138099	0.903214	2.49356	0.339379
7	OSBPL6	CER	-0.385536	1.35902	0.362836	0.129249
7	OSBPL6	DAG	-0.131992	0.579471	2.68851	0.701772
7	OSBPL6	DCER	-1.44464	0.717579	0.034806	0.00537515
7	OSBPL6	FFA	0.108638	0.162319	7.27716	2.01951
7	OSBPL6	HCER	-0.351153	0.605991	1.2472	0.209581
7	OSBPL6	LCER	-0.748631	1.08129	0.291446	0.020228
7	OSBPL6	LPC	0.158905	1.05129	0.249337	0.0849313
7	OSBPL6	LPE	-0.794938	0.490499	0.150907	0.0163931
7	OSBPL6	PA	-0.816353	0.870102	0.506182	0.101741
7	OSBPL6	PC	0.567771	0.845653	38.382	0.615365
7	OSBPL6	PE	0.0860492	1.06226	21.5625	1.48863
7	OSBPL6	PG	-0.663263	0.528284	0.789752	0.0842037
7	OSBPL6	PI	0.25197	0.424647	10.4336	0.371797
7	OSBPL6	PS	-0.197265	0.404671	4.59227	0.225902
7	OSBPL6	SM	-0.839827	0.926434	5.82488	1.12427
7	OSBPL6	TAG	-0.607923	0.376667	3.11304	0.303106
8	OSBPL7	CE	0.449084	0.75084	2.8318	0.153888
8	OSBPL7	CER	-0.601343	0.226543	0.350649	0.0415096
8	OSBPL7	DAG	0.778106	1.96963	3.0232	1.20362
8	OSBPL7	DCER	-1.46471	NA	0.0368485	NA
8	OSBPL7	FFA	-0.438353	0.760203	6.61063	0.952221
8	OSBPL7	HCER	-0.13802	0.246446	1.29235	0.131986
8	OSBPL7	LCER	-1.08844	0.183382	0.26702	0.0429409
8	OSBPL7	LPC	-0.238998	0.23528	0.232624	0.0031465
8	OSBPL7	LPE	-0.947697	0.29327	0.151214	0.0487188
8	OSBPL7	PA	-0.602444	0.0148098	0.598421	0.283757
8	OSBPL7	PC	0.344668	0.475841	38.0412	2.38594
8	OSBPL7	PE	0.17627	0.589776	21.7791	0.293648
8	OSBPL7	PG	-0.970324	0.0476274	0.754835	0.0300773
8	OSBPL7	PI	-0.733138	0.355567	9.33627	1.37707
8	OSBPL7	PS	0.250163	0.289021	4.86156	0.328185
8	OSBPL7	SM	-0.00963177	0.0816103	6.32684	0.529301
8	OSBPL7	TAG	-0.277797	0.0236022	3.52393	0.799726
9	OSBPL8	CE	1.88288	0.171211	4.36944	1.19674
9	OSBPL8	CER	0.914343	0.795683	0.599117	0.278291
9	OSBPL8	DAG	-0.752724	2.00017	2.75492	1.14001
9	OSBPL8	DCER	0.509985	1.07752	0.066642	0.0295064
9	OSBPL8	FFA	0.0718908	1.46191	8.32413	3.44421
9	OSBPL8	HCER	0.397598	0.516276	1.52656	0.30368
9	OSBPL8	LCER	2.40338	1.47177	0.669575	0.313466
9	OSBPL8	LPC	0.381958	1.00608	0.224085	0.0897859
9	OSBPL8	LPE	-0.398058	0.986658	0.144142	0.0426565
9	OSBPL8	PA	-0.446507	0.622608	0.599505	0.171018
9	OSBPL8	PC	0.448851	0.719861	36.8356	4.35971
9	OSBPL8	PE	-0.945791	0.477717	18.9739	1.49727
9	OSBPL8	PG	0.924487	1.18723	0.998834	0.0781593
9	OSBPL8	PI	-0.107533	0.559782	9.69915	0.470002
9	OSBPL8	PS	0.903194	0.440874	5.23874	0.289756
9	OSBPL8	SM	-0.180664	0.48536	5.80056	0.999155
9	OSBPL8	TAG	-0.638225	0.525619	3.17515	1.09599
10	OSBPL9	CE	0.710074	0.56293	4.17635	1.36211
10	OSBPL9	CER	2.30314	0.545422	0.840628	0.290008
10	OSBPL9	DAG	1.37412	0.466278	3.23521	0.766539
10	OSBPL9	DCER	0.951777	0.792559	0.0789056	0.0294376
10	OSBPL9	FFA	0.329802	0.484043	7.82266	2.10755
10	OSBPL9	HCER	4.28084	1.47204	2.695	0.450915
10	OSBPL9	LCER	0.822177	0.886694	0.634316	0.306028
10	OSBPL9	LPC	-0.239968	0.735303	0.253443	0.0856598
10	OSBPL9	LPE	-0.808084	0.270959	0.128663	0.0487062
10	OSBPL9	PA	0.525518	0.52688	0.722432	0.20022
10	OSBPL9	PC	0.445601	0.637187	36.5257	1.77653
10	OSBPL9	PE	-0.419461	0.404747	19.8561	0.830882
10	OSBPL9	PG	1.38915	0.97896	1.10246	0.0992252
10	OSBPL9	PI	-0.595364	0.481301	9.45461	0.77958
10	OSBPL9	PS	-1.24434	0.86957	4.22035	0.678448
10	OSBPL9	SM	-2.628	0.902728	4.61348	1.07811
10	OSBPL9	TAG	-0.364389	1.36684	3.63969	2.06436
11	OSBPL10	CE	-0.563847	0.395815	2.36969	0.306555
11	OSBPL10	CER	-0.575408	0.59001	0.356224	0.02332
11	OSBPL10	DAG	-1.00457	0.556539	2.37371	0.283705
11	OSBPL10	DCER	0.0112197	0.244703	0.0511371	0.00775401
11	OSBPL10	FFA	0.385168	0.245195	7.56693	2.17136
11	OSBPL10	HCER	0.254276	0.111615	1.37961	0.107802
11	OSBPL10	LCER	-1.13898	0.534991	0.26378	0.0185032
11	OSBPL10	LPC	0.58576	0.828041	0.294148	0.0511617
11	OSBPL10	LPE	-0.549044	0.172092	0.164828	0.0351449
11	OSBPL10	PA	-0.409588	0.465446	0.663423	0.395044
11	OSBPL10	PC	0.131148	0.0586809	37.4755	1.09113
11	OSBPL10	PE	0.00312988	0.454792	21.3119	2.36789
11	OSBPL10	PG	-0.404089	0.510433	0.81367	0.0256695
11	OSBPL10	PI	0.456906	0.357316	10.5668	1.1392
11	OSBPL10	PS	0.440462	0.970556	5.02182	1.08836
11	OSBPL10	SM	-0.384779	0.313746	6.07714	0.354606
11	OSBPL10	TAG	-0.56445	0.0779545	3.24971	0.788171
12	OSBPL11	CE	0.168884	0.314008	3.02156	0.517286
12	OSBPL11	CER	-0.129139	0.143931	0.563518	0.265078
12	OSBPL11	DAG	0.570467	1.27832	3.01024	0.774028
12	OSBPL11	DCER	-0.477306	0.462727	0.0767028	0.0250255
12	OSBPL11	FFA	0.328205	0.870453	7.43884	1.75524
12	OSBPL11	HCER	2.31071	0.739976	1.96994	0.30418
12	OSBPL11	LCER	-0.293749	0.785985	0.436186	0.300471
12	OSBPL11	LPC	-0.725921	1.25774	0.19685	0.082658
12	OSBPL11	LPE	-1.24205	0.428466	0.129271	0.0503919
12	OSBPL11	PA	-0.183771	0.684834	0.475233	0.10605
12	OSBPL11	PC	0.731851	0.467398	36.7395	1.41745
12	OSBPL11	PE	-0.640831	0.69938	20.203	1.524
12	OSBPL11	PG	0.521207	1.10852	0.951748	0.21796
12	OSBPL11	PI	0.306242	0.512156	10.3408	0.547127
12	OSBPL11	PS	-1.0111	0.98153	4.27971	0.697875
12	OSBPL11	SM	-1.39504	0.703463	5.44093	0.66972
12	OSBPL11	TAG	0.390119	0.533936	4.75163	0.904017
13	STAR	CE	0.0492907	0.415988	2.62686	0.0548879
13	STAR	CER	-0.328992	0.058033	0.393219	0.0113497
13	STAR	DAG	-0.183585	0.942818	2.64983	0.86225
13	STAR	DCER	0.208396	1.02918	0.0646074	0.0313993
13	STAR	FFA	-0.601394	0.637068	6.82206	2.61369
13	STAR	HCER	0.165959	0.0137323	1.36595	0.0679979
13	STAR	LCER	-0.165517	0.148906	0.338573	0.0751682
13	STAR	LPC	-0.174964	0.934557	0.168217	0.00123813
13	STAR	LPE	-0.957372	0.734053	0.134426	0.0123907
13	STAR	PA	-0.242253	0.640724	0.483084	0.0147318
13	STAR	PC	0.584886	0.475232	37.4049	0.761939
13	STAR	PE	0.289421	0.727257	22.796	1.96367
13	STAR	PG	-0.989902	0.3836	0.72883	0.101731
13	STAR	PI	-0.436682	1.90573	9.58069	0.611237
13	STAR	PS	-0.331699	0.99323	4.4363	0.209288
13	STAR	SM	-0.254922	0.247426	5.99483	0.643998
13	STAR	TAG	-0.25258	0.0107652	4.01162	0.202068
14	PCTP	CE	-0.475113	0.00946902	2.3658	0.0799877
14	PCTP	CER	-0.0922667	0.757685	0.408426	0.0511513
14	PCTP	DAG	-0.715519	1.61751	2.49978	0.132131
14	PCTP	DCER	1.07838	NA	0.0890821	NA
14	PCTP	FFA	-0.898343	1.08678	6.59357	3.01844
14	PCTP	HCER	0.122778	1.57724	1.40636	0.372307
14	PCTP	LCER	-0.00693939	0.191781	0.346416	0.0462123
14	PCTP	LPC	-0.604127	0.405328	0.15914	0.00783297
14	PCTP	LPE	-0.716542	1.54867	0.139006	0.021439
14	PCTP	PA	1.00089	2.05137	0.600705	0.114546
14	PCTP	PC	0.282622	0.336497	36.7191	0.406472
14	PCTP	PE	-0.0414463	0.0890306	21.9992	0.323049
14	PCTP	PG	0.00419548	0.658253	0.832302	0.145525
14	PCTP	PI	0.597383	0.327194	10.5911	1.25511
14	PCTP	PS	1.11659	2.1278	5.18087	0.870778
14	PCTP	SM	0.231331	0.49104	6.24938	0.591329
14	PCTP	TAG	-0.363951	0.11656	3.8643	0.0360414
15	STARD3	CE	-0.936735	0.131181	2.11785	0.049454
15	STARD3	CER	-0.684993	0.152691	0.344349	0.0363884
15	STARD3	DAG	-0.724202	1.32494	2.52175	0.90408
15	STARD3	DCER	-0.63445	0.7682	0.043293	0.00424623
15	STARD3	FFA	0.109039	0.742576	7.34896	2.60625
15	STARD3	HCER	0.196177	0.116049	1.36474	0.0556326
15	STARD3	LCER	-0.587686	0.282361	0.30202	0.035225
15	STARD3	LPC	-0.51373	1.07298	0.202969	0.0975152
15	STARD3	LPE	-0.722532	1.06139	0.148942	0.00786184
15	STARD3	PA	-0.822161	0.982283	0.498124	0.0806459
15	STARD3	PC	0.454767	0.775655	38.1296	0.483317
15	STARD3	PE	-0.257657	0.181352	20.6665	0.766343
15	STARD3	PG	-0.375891	0.863956	0.815348	0.0635259
15	STARD3	PI	7.51959e-06	1.80427	10.312	1.00422
15	STARD3	PS	0.137467	0.082647	4.80887	0.539733
15	STARD3	SM	-0.449629	0.0461208	6.04728	0.582413
15	STARD3	TAG	0.412938	0.437261	4.32743	1.5531
16	STARD4	CE	-0.436203	0.464081	3.30505	1.73231
16	STARD4	CER	-1.07476	0.566651	0.441946	0.267295
16	STARD4	DAG	-0.714651	0.929434	2.37005	0.563253
16	STARD4	DCER	-1.08675	0.0144861	0.0554197	0.019681
16	STARD4	FFA	-0.403546	0.914265	6.47078	2.07167
16	STARD4	HCER	-0.164178	0.333463	1.35948	0.212906
16	STARD4	LCER	-0.268596	0.932944	0.495561	0.364605
16	STARD4	LPC	-0.345713	0.906365	0.261637	0.0975266
16	STARD4	LPE	-0.612998	0.882193	0.137481	0.0220153
16	STARD4	PA	-0.368574	1.20815	0.524235	0.0874546
16	STARD4	PC	-0.313724	0.214957	35.8727	1.53282
16	STARD4	PE	0.600238	0.346258	22.0015	2.43565
16	STARD4	PG	0.598099	0.995896	0.982983	0.168786
16	STARD4	PI	0.235555	0.598236	10.1987	1.20265
16	STARD4	PS	-0.0263433	0.841824	4.96464	1.00672
16	STARD4	SM	-0.580424	0.430381	6.34964	1.01596
16	STARD4	TAG	0.334689	0.795587	4.2267	1.15877
17	STARD5	CE	-0.457507	0.174316	2.37948	0.00919435
17	STARD5	CER	-0.578371	0.240903	0.354483	0.00432695
17	STARD5	DAG	-0.920639	0.0255011	2.41861	0.475446
17	STARD5	DCER	-0.660629	NA	0.0464897	NA
17	STARD5	FFA	-1.06227	0.78916	6.1705	2.36507
17	STARD5	HCER	0.0529501	0.906466	1.32628	0.124573
17	STARD5	LCER	0.324791	0.0112152	0.365433	0.0526513
17	STARD5	LPC	-0.451826	0.885982	0.208762	0.0836531
17	STARD5	LPE	-0.24388	1.48347	0.166535	0.0180367
17	STARD5	PA	1.26352	0.295955	0.95665	0.573174
17	STARD5	PC	-0.704842	1.67932	35.3237	2.88487
17	STARD5	PE	0.73518	1.25996	23.216	2.0249
17	STARD5	PG	0.548712	0.445403	0.916534	0.0113386
17	STARD5	PI	0.747725	1.29306	10.7733	2.04834
17	STARD5	PS	-0.278033	0.447694	4.54282	0.194326
17	STARD5	SM	-0.0361104	0.79756	6.28594	0.0657351
17	STARD5	TAG	0.990309	1.28955	4.57178	0.0110694
18	STARD6	CE	-0.525176	0.723518	3.36663	1.99236
18	STARD6	CER	-0.63267	0.611079	0.482812	0.255243
18	STARD6	DAG	-0.670709	0.277313	2.38848	0.349398
18	STARD6	DCER	-0.570145	0.664271	0.0562033	0.0222868
18	STARD6	FFA	-0.112428	0.776465	6.58765	2.41814
18	STARD6	HCER	0.208496	0.900446	1.42702	0.124896
18	STARD6	LCER	-0.183649	0.30301	0.481608	0.24814
18	STARD6	LPC	-0.200092	0.543215	0.2687	0.0959694
18	STARD6	LPE	-0.537275	1.49176	0.137007	0.0431556
18	STARD6	PA	1.03245	0.203372	0.804328	0.343694
18	STARD6	PC	-0.266999	0.808217	36.131	3.01289
18	STARD6	PE	0.910469	0.0912597	22.5559	2.19944
18	STARD6	PG	0.893154	0.571373	1.01196	0.0456726
18	STARD6	PI	-1.11589	3.24849	8.52481	4.16674
18	STARD6	PS	0.271322	1.05788	5.10016	0.980541
18	STARD6	SM	-0.309607	0.674474	6.51655	0.515692
18	STARD6	TAG	0.532946	0.650169	4.15915	0.197449
19	STARD7	CE	1.70951	2.83061	3.42646	0.981075
19	STARD7	CER	2.58904	3.26163	0.663241	0.150496
19	STARD7	DAG	0.0377692	0.316053	3.05669	0.172585
19	STARD7	DCER	1.7455	3.7163	0.0654867	0.0302429
19	STARD7	FFA	-0.173186	1.55025	6.82941	0.286508
19	STARD7	HCER	0.31142	0.386795	1.44294	0.10236
19	STARD7	LCER	1.91784	2.53634	0.575743	0.0113839
19	STARD7	LPC	-0.320364	0.313479	0.173036	0.0277975
19	STARD7	LPE	-0.687449	1.40072	0.138486	0.00979251
19	STARD7	PA	1.5583	0.481221	0.74682	0.254823
19	STARD7	PC	-0.169401	0.814673	34.5114	0.337965
19	STARD7	PE	-0.365187	0.638831	21.74	2.27686
19	STARD7	PG	5.09522	2.37004	1.63693	0.015822
19	STARD7	PI	-0.147491	1.25025	9.80362	0.0227268
19	STARD7	PS	2.99946	0.997954	6.25859	0.172395
19	STARD7	SM	0.828251	0.589765	6.69284	0.480082
19	STARD7	TAG	-1.36477	0.21491	2.23838	0.345825
20	STARD8	CE	-0.0859111	0.195054	2.68356	0.2033
20	STARD8	CER	-0.148776	0.529567	0.3954	0.0470809
20	STARD8	DAG	-0.322683	1.27726	2.76118	0.754945
20	STARD8	DCER	-1.09104	NA	0.0393504	NA
20	STARD8	FFA	-0.219946	0.200114	7.4018	2.61635
20	STARD8	HCER	-0.189962	0.459892	1.22751	0.256764
20	STARD8	LCER	-0.124937	0.102556	0.421589	0.185217
20	STARD8	LPC	-0.0748353	1.48545	0.159512	0.0193309
20	STARD8	LPE	-0.94964	0.86492	0.126396	0.0168266
20	STARD8	PA	1.39649	0.488711	0.715381	0.141223
20	STARD8	PC	-0.821938	1.70829	33.1142	1.55136
20	STARD8	PE	0.036537	1.16441	22.2779	2.89529
20	STARD8	PG	0.0422613	0.000234871	0.935086	0.0681875
20	STARD8	PI	0.821665	0.236416	10.6386	0.968236
20	STARD8	PS	0.395471	0.381369	4.74176	0.409186
20	STARD8	SM	0.603227	1.43599	6.57216	0.155142
20	STARD8	TAG	0.787712	0.652218	5.80831	0.43798
21	STARD9	CE	-0.273041	0.0423286	2.57553	0.155811
21	STARD9	CER	-0.38773	0.170609	0.367974	0.0249281
21	STARD9	DAG	0.17561	0.461155	2.84121	0.348481
21	STARD9	DCER	0.105497	NA	0.0665889	NA
21	STARD9	FFA	0.0849736	0.980641	8.14383	2.52239
21	STARD9	HCER	-0.146078	0.378015	1.2395	0.14238
21	STARD9	LCER	-0.261723	0.225782	0.378922	0.0878097
21	STARD9	LPC	0.729597	0.914203	0.273014	0.110935
21	STARD9	LPE	-0.157632	0.215984	0.164458	0.0611457
21	STARD9	PA	0.156074	0.220079	0.724424	0.273119
21	STARD9	PC	0.877433	1.38318	38.2851	4.25327
21	STARD9	PE	-0.228335	0.449179	21.1249	1.81424
21	STARD9	PG	0.244767	0.22541	0.924779	0.0569887
21	STARD9	PI	-0.768889	1.0317	9.21026	1.59101
21	STARD9	PS	-0.560544	1.25023	4.28473	0.434072
21	STARD9	SM	-0.34067	0.439179	5.69518	0.887979
21	STARD9	TAG	-0.337459	0.244773	3.744	0.913414
22	STARD10	CE	-0.826287	0.0964423	2.10867	0.0315801
22	STARD10	CER	-0.671981	0.213041	0.331961	0.0596572
22	STARD10	DAG	-0.937667	0.708415	2.66177	0.144516
22	STARD10	DCER	-0.199041	0.368923	0.0507023	0.00426455
22	STARD10	FFA	0.837279	0.840364	9.06201	4.24872
22	STARD10	HCER	-0.442796	0.375297	1.13393	0.284636
22	STARD10	LCER	-0.713267	0.583227	0.323118	0.056323
22	STARD10	LPC	0.674162	0.735281	0.212917	0.0504978
22	STARD10	LPE	0.35514	0.455334	0.196873	0.0472684
22	STARD10	PA	-0.741053	0.373204	0.486503	0.179968
22	STARD10	PC	-0.34564	0.491814	33.6768	3.76795
22	STARD10	PE	0.57	0.218567	24.2557	0.380541
22	STARD10	PG	-0.205146	0.000796575	0.897587	0.0548576
22	STARD10	PI	-0.646046	0.305622	9.49449	0.67353
22	STARD10	PS	-0.253363	0.970222	4.2798	0.477905
22	STARD10	SM	-0.603469	0.0946098	5.5347	1.05934
22	STARD10	TAG	0.271161	0.557792	5.29253	1.38317
23	DLC1	CE	-0.468523	0.141925	2.35355	0.00675865
23	DLC1	CER	-0.0310925	0.426307	0.420067	0.0168091
23	DLC1	DAG	-0.373746	0.690373	2.80004	0.459914
23	DLC1	DCER	-0.281581	0.0868079	0.0515912	0.0107245
23	DLC1	FFA	-0.279292	0.650399	7.01284	1.42467
23	DLC1	HCER	-0.105808	0.425883	1.26636	0.2219
23	DLC1	LCER	-0.0294651	0.0746583	0.426779	0.170423
23	DLC1	LPC	-1.14143	0.475876	0.149764	0.0308401
23	DLC1	LPE	-0.367003	0.187186	0.160781	0.0764553
23	DLC1	PA	-0.819281	0.308274	0.468406	0.101119
23	DLC1	PC	0.0535327	0.653147	35.0312	0.617446
23	DLC1	PE	0.68164	0.678319	24.4208	0.931176
23	DLC1	PG	-0.506386	0.102275	0.854661	0.0538289
23	DLC1	PI	-0.218785	0.761136	9.78848	0.390386
23	DLC1	PS	-0.162674	0.299283	4.39792	0.303897
23	DLC1	SM	0.0756643	1.19493	6.14151	0.104371
23	DLC1	TAG	-0.283905	0.438591	4.25529	0.79139
24	STARD13	CE	-0.410857	0.394831	2.38632	0.104868
24	STARD13	CER	-0.870554	0.405138	0.328578	0.0579635
24	STARD13	DAG	0.394707	0.146311	2.84393	0.595511
24	STARD13	DCER	-0.697803	NA	0.046044	NA
24	STARD13	FFA	-0.540222	1.92504	6.3643	0.250497
24	STARD13	HCER	-0.616689	0.197652	1.18109	0.0244727
24	STARD13	LCER	-0.910701	0.360298	0.279558	0.0303147
24	STARD13	LPC	-0.180354	0.192213	0.236296	0.00513655
24	STARD13	LPE	0.436883	0.712809	0.204065	0.0289115
24	STARD13	PA	-0.468623	0.607525	0.661573	0.413472
24	STARD13	PC	-0.0314396	1.56415	37.3149	4.80645
24	STARD13	PE	1.08341	0.539768	24.0527	2.52663
24	STARD13	PG	-0.0797515	0.0917757	0.850916	0.0416807
24	STARD13	PI	-0.678619	0.607863	9.36724	1.62701
24	STARD13	PS	-1.39167	0.637698	3.87626	0.0023194
24	STARD13	SM	-0.565317	0.677552	5.94858	0.107929
24	STARD13	TAG	0.491497	1.18171	4.08068	0.0798655
25	ACOT11	CE	-0.188166	0.291126	2.56869	0.313289
25	ACOT11	CER	-0.318658	0.313385	0.37264	0.0459407
25	ACOT11	DAG	-0.376148	1.20912	2.55495	0.113408
25	ACOT11	DCER	-1.68176	0.291004	0.0333417	0.00476817
25	ACOT11	FFA	-0.320643	1.50385	6.63812	0.229366
25	ACOT11	HCER	0.30088	0.225347	1.391	0.134141
25	ACOT11	LCER	-0.817832	0.317587	0.286	0.0331423
25	ACOT11	LPC	-0.0188481	0.732793	0.251845	0.0346485
25	ACOT11	LPE	-0.502111	0.255672	0.170834	0.0551654
25	ACOT11	PA	0.829883	0.817734	0.910484	0.613776
25	ACOT11	PC	1.40159	0.1965	40.3996	1.11002
25	ACOT11	PE	-0.787535	1.36711	19.3523	2.21659
25	ACOT11	PG	-0.447953	0.85856	0.814211	0.121429
25	ACOT11	PI	0.0746142	1.91845	10.0142	2.83066
25	ACOT11	PS	0.312469	0.567965	4.88791	0.16773
25	ACOT11	SM	0.0613284	0.177467	6.36942	0.472193
25	ACOT11	TAG	-0.863369	0.285933	2.98442	0.881085
26	ACOT12	CE	-0.209625	0.173909	2.51676	0.0521094
26	ACOT12	CER	-0.190891	0.111539	0.38362	0.0288679
26	ACOT12	DAG	-1.04332	0.474353	2.36384	0.307651
26	ACOT12	DCER	0.173007	1.09629	0.053716	0.0170612
26	ACOT12	FFA	0.157139	0.545572	7.23908	1.31577
26	ACOT12	HCER	-0.00861265	0.0663292	1.31903	0.0636047
26	ACOT12	LCER	-0.181641	0.314422	0.329852	0.0761827
26	ACOT12	LPC	0.654363	0.767457	0.29836	0.048133
26	ACOT12	LPE	0.0411222	0.795485	0.200096	0.0892621
26	ACOT12	PA	-0.319054	0.653476	0.691601	0.440491
26	ACOT12	PC	-0.570564	0.907225	35.7374	1.06091
26	ACOT12	PE	0.388516	0.605485	22.3184	0.344742
26	ACOT12	PG	0.0837956	0.147447	0.868744	0.0489341
26	ACOT12	PI	0.259312	0.448295	10.3533	1.27308
26	ACOT12	PS	-0.415044	0.158456	4.48459	0.542873
26	ACOT12	SM	0.440488	1.3217	6.57592	0.240633
26	ACOT12	TAG	0.647244	1.05891	4.26567	0.109422
27	NPC1	CE	0.579214	1.34	4.39111	2.26767
27	NPC1	CER	2.29621	1.46698	0.904178	0.295191
27	NPC1	DAG	-0.462919	0.515796	2.52981	0.365921
27	NPC1	DCER	1.86563	1.31384	0.113246	0.0229757
27	NPC1	FFA	-0.00823824	1.31527	7.01953	2.61889
27	NPC1	HCER	1.14355	1.26409	1.72852	0.305355
27	NPC1	LCER	0.844688	0.308222	0.655205	0.305828
27	NPC1	LPC	1.24905	1.30269	0.314911	0.121874
27	NPC1	LPE	-0.467921	0.750123	0.150678	0.0293046
27	NPC1	PA	-0.357264	1.14373	0.532138	0.0744888
27	NPC1	PC	-1.0793	0.517088	33.975	2.2555
27	NPC1	PE	-1.38193	1.06536	17.2362	1.52337
27	NPC1	PG	0.562795	1.21758	1.01078	0.0316462
27	NPC1	PI	1.18177	1.41367	11.1553	1.6114
27	NPC1	PS	0.929877	0.549561	5.59699	0.297116
27	NPC1	SM	1.01479	0.217254	7.44055	0.723925
27	NPC1	TAG	1.06362	2.15127	5.27411	3.1939
28	NPC1L1	CE	-0.600905	0.127109	2.30414	0.0106368
28	NPC1L1	CER	-0.0232079	0.536156	0.395055	0.0610164
28	NPC1L1	DAG	-0.550484	0.177317	2.54195	0.546996
28	NPC1L1	DCER	-1.05939	0.459425	0.0400738	0.00782026
28	NPC1L1	FFA	-0.102382	1.09392	7.17845	2.90943
28	NPC1L1	HCER	0.586138	0.0547915	1.45388	0.10023
28	NPC1L1	LCER	0.552259	1.77662	0.38273	0.0708312
28	NPC1L1	LPC	-0.266421	1.22084	0.218732	0.103589
28	NPC1L1	LPE	-0.662497	0.324864	0.158351	0.0262304
28	NPC1L1	PA	-0.39716	0.99667	0.574398	0.1311
28	NPC1L1	PC	-1.4089	0.606892	33.9972	2.2228
28	NPC1L1	PE	0.865947	0.478397	23.5021	2.38228
28	NPC1L1	PG	0.674359	1.16081	0.927315	0.0874189
28	NPC1L1	PI	0.928514	0.175327	11.1082	0.493375
28	NPC1L1	PS	0.945768	0.173919	5.27777	0.448895
28	NPC1L1	SM	-0.390696	0.0230706	6.08299	0.541704
28	NPC1L1	TAG	-0.113572	0.786352	3.85665	1.69903
29	NPC2	CE	-0.520319	0.533581	3.34276	1.92856
29	NPC2	CER	1.56536	0.504431	0.677633	0.228565
29	NPC2	DAG	-0.277831	0.0814077	2.50142	0.445503
29	NPC2	DCER	1.30872	1.39749	0.0750305	0.0131362
29	NPC2	FFA	-0.174399	1.37147	6.42046	3.23669
29	NPC2	HCER	1.04414	0.487806	1.65017	0.220905
29	NPC2	LCER	0.297963	0.187792	0.529827	0.298408
29	NPC2	LPC	0.481304	1.35551	0.297623	0.139116
29	NPC2	LPE	-0.278895	0.309158	0.158108	0.0454247
29	NPC2	PA	-0.815867	0.868888	0.487273	0.0382529
29	NPC2	PC	-0.94975	1.33568	34.2597	2.3029
29	NPC2	PE	0.00774562	0.364472	20.6083	2.33043
29	NPC2	PG	0.834839	1.28095	1.00043	0.0913993
29	NPC2	PI	-0.169959	0.943112	9.75088	0.367787
29	NPC2	PS	0.140279	0.615105	5.06232	0.491642
29	NPC2	SM	1.23001	1.32747	7.46095	0.584905
29	NPC2	TAG	1.73983	1.50079	5.71708	2.83662
30	LY86	CE	0.0481258	0.20927	2.69247	0.30866
30	LY86	CER	0.545981	0.0275934	0.442284	0.0158663
30	LY86	DAG	-0.202524	0.466663	2.63356	0.362112
30	LY86	DCER	-0.650121	NA	0.0466157	NA
30	LY86	FFA	0.469365	1.57453	7.81563	3.53604
30	LY86	HCER	0.710148	0.936673	1.48874	0.300726
30	LY86	LCER	-0.469494	0.0280059	0.310011	0.0566768
30	LY86	LPC	0.231946	1.59619	0.249859	0.121145
30	LY86	LPE	-0.0891927	0.612333	0.181413	0.0238132
30	LY86	PA	-0.401495	1.24184	0.558305	0.0860406
30	LY86	PC	-0.139669	0.452024	36.7959	0.108044
30	LY86	PE	-0.609423	0.0632418	19.7701	1.08482
30	LY86	PG	1.43734	1.2311	1.00922	0.0891214
30	LY86	PI	0.868403	0.269348	11.0012	0.965349
30	LY86	PS	0.985518	0.239872	5.31694	0.696903
30	LY86	SM	0.00170929	0.507137	6.35374	0.909812
30	LY86	TAG	-0.572405	0.64992	3.35725	1.37309
31	LY96	CE	-0.910931	0.241779	2.16425	0.161493
31	LY96	CER	-0.182253	0.135642	0.384199	0.0307004
31	LY96	DAG	-1.21922	0.262754	2.314	0.364593
31	LY96	DCER	-0.445305	0.140754	0.0459302	0.00275478
31	LY96	FFA	-0.420246	0.0227918	6.71968	1.7022
31	LY96	HCER	0.245918	0.35064	1.37961	0.161485
31	LY96	LCER	-0.361895	0.166423	0.317672	0.0429432
31	LY96	LPC	0.746219	0.569064	0.293645	0.0421297
31	LY96	LPE	0.208509	1.627	0.185492	0.0162119
31	LY96	PA	-1.25963	0.458108	0.451412	0.121205
31	LY96	PC	0.25636	0.632886	37.8575	2.72617
31	LY96	PE	-0.242849	0.343447	20.6902	2.09815
31	LY96	PG	-0.472488	0.97301	0.812008	0.133566
31	LY96	PI	1.16586	0.507424	11.2848	1.15165
31	LY96	PS	0.518493	0.404977	5.01605	0.279802
31	LY96	SM	-0.177982	0.0259005	6.2201	0.554033
31	LY96	TAG	0.121258	0.374145	3.86335	0.600734
32	GM2A	CE	-0.648758	0.217511	2.30732	0.193207
32	GM2A	CER	-0.115152	0.333557	0.388654	0.0457803
32	GM2A	DAG	-0.180339	0.48245	2.67002	0.667686
32	GM2A	DCER	-0.777398	NA	0.0450896	NA
32	GM2A	FFA	-1.05511	0.634804	6.00252	0.927209
32	GM2A	HCER	0.206252	0.510612	1.37194	0.196876
32	GM2A	LCER	-1.09704	0.090268	0.266198	0.0620382
32	GM2A	LPC	-0.167159	0.520403	0.231325	0.0538537
32	GM2A	LPE	1.19789	1.22956	0.233444	0.0196477
32	GM2A	PA	-0.0851934	1.17236	0.620078	0.13815
32	GM2A	PC	-0.177567	0.149428	36.7484	0.798793
32	GM2A	PE	0.450281	0.511112	22.4728	0.108366
32	GM2A	PG	0.429593	0.0357303	0.905555	0.0395619
32	GM2A	PI	0.527989	0.0451274	10.6717	0.802029
32	GM2A	PS	0.676657	1.47713	5.0692	0.343066
32	GM2A	SM	0.425426	0.877826	6.58097	0.0446721
32	GM2A	TAG	-0.235259	0.668133	3.43728	0.154182
33	PITPNM1	CE	-1.13672	0.316415	1.99117	0.186457
33	PITPNM1	CER	-0.799625	0.766863	0.332629	0.0859711
33	PITPNM1	DAG	-1.23067	0.157509	2.32333	0.498583
33	PITPNM1	DCER	-0.753227	0.608914	0.0422046	0.00281117
33	PITPNM1	FFA	0.559093	0.428107	7.76527	2.39908
33	PITPNM1	HCER	-0.668344	0.239261	1.16914	0.0142922
33	PITPNM1	LCER	-0.853401	0.607994	0.283755	0.0129483
33	PITPNM1	LPC	1.58214	2.91914	0.331665	0.18972
33	PITPNM1	LPE	-0.205742	0.713919	0.175265	0.0171353
33	PITPNM1	PA	-0.76733	0.939145	0.510773	0.0953254
33	PITPNM1	PC	0.118025	0.728428	37.356	0.46355
33	PITPNM1	PE	0.465424	0.554131	22.5124	0.218403
33	PITPNM1	PG	-0.370931	0.358739	0.820584	0.0681925
33	PITPNM1	PI	0.653196	0.224901	10.7831	0.962727
33	PITPNM1	PS	-0.620779	0.29841	4.34552	0.256819
33	PITPNM1	SM	-0.731611	0.0110302	5.86349	0.526786
33	PITPNM1	TAG	-0.320919	0.448084	3.39371	0.345794
34	PITPNM2	CE	-0.23453	0.786497	2.45022	0.291361
34	PITPNM2	CER	-0.396568	0.60114	0.365234	0.0693803
34	PITPNM2	DAG	-0.991978	0.153117	2.39023	0.413786
34	PITPNM2	DCER	0.0065909	1.14001	0.0496677	0.00684954
34	PITPNM2	FFA	-0.108191	0.116349	7.02365	1.68441
34	PITPNM2	HCER	-0.698314	0.00801729	1.16421	0.0658825
34	PITPNM2	LCER	0.226722	0.376026	0.358279	0.0798153
34	PITPNM2	LPC	1.35399	1.17071	0.330418	0.0734193
34	PITPNM2	LPE	0.072007	1.25186	0.1828	0.00189624
34	PITPNM2	PA	-0.628344	1.39295	0.507679	0.0302751
34	PITPNM2	PC	-0.125107	1.0215	37.0257	3.52472
34	PITPNM2	PE	0.542131	0.19559	22.6874	1.68126
34	PITPNM2	PG	-0.574724	0.651485	0.799762	0.098153
34	PITPNM2	PI	0.598218	0.798951	10.6685	1.56746
34	PITPNM2	PS	-0.575794	0.356418	4.36996	0.225872
34	PITPNM2	SM	-0.552426	0.125727	5.97525	0.464727
34	PITPNM2	TAG	-0.177323	0.0942318	3.65108	0.961545
35	PITPNC1	CE	-0.465986	0.205596	2.36676	0.203972
35	PITPNC1	CER	-0.364416	0.414503	0.358541	0.0513463
35	PITPNC1	DAG	0.133979	1.07614	2.84086	0.195007
35	PITPNC1	DCER	-0.302873	0.216073	0.0497995	0.00374644
35	PITPNC1	FFA	0.045934	1.0275	8.03998	2.31954
35	PITPNC1	HCER	-0.298569	0.476938	1.1678	0.270281
35	PITPNC1	LCER	0.096647	1.28687	0.390225	0.105642
35	PITPNC1	LPC	-0.232313	0.703007	0.21781	0.0712469
35	PITPNC1	LPE	0.0885604	0.224902	0.175657	0.0632745
35	PITPNC1	PA	0.714439	1.19191	0.889579	0.561912
35	PITPNC1	PC	0.355733	0.39593	36.6962	3.34257
35	PITPNC1	PE	-0.464951	0.0384726	20.5575	1.23891
35	PITPNC1	PG	-0.684753	0.525653	0.797091	0.0325479
35	PITPNC1	PI	0.560605	0.539426	10.2927	1.16227
35	PITPNC1	PS	-0.284344	0.325604	4.48802	0.447411
35	PITPNC1	SM	0.050404	0.455684	6.00573	0.555488
35	PITPNC1	TAG	0.170795	0.563133	4.66582	1.81039
36	PITPNB	CE	-0.0201409	0.726223	3.68147	1.56423
36	PITPNB	CER	0.480057	1.24059	1.08636	1.14568
36	PITPNB	DAG	-0.652113	0.534746	2.47567	0.331839
36	PITPNB	DCER	0.257781	1.13846	0.10703	0.0985781
36	PITPNB	FFA	-0.187451	0.71473	6.31557	2.05159
36	PITPNB	HCER	0.73046	0.493106	1.65379	0.279407
36	PITPNB	LCER	-1.28508	0.605506	0.41579	0.231446
36	PITPNB	LPC	1.3195	0.58111	0.339866	0.0699514
36	PITPNB	LPE	-0.158309	0.757262	0.167791	0.0581046
36	PITPNB	PA	0.340434	2.33598	0.576518	0.214648
36	PITPNB	PC	0.656954	1.20061	37.0014	2.45619
36	PITPNB	PE	-0.0437572	0.749826	20.7836	2.72431
36	PITPNB	PG	-0.480774	0.554755	0.895674	0.160858
36	PITPNB	PI	-1.15161	1.12332	9.16001	0.556143
36	PITPNB	PS	0.0474446	0.829028	5.0739	0.926541
36	PITPNB	SM	-0.0959094	0.711514	6.74245	0.949678
36	PITPNB	TAG	-0.336648	0.486649	3.52317	0.522737
37	PITPNA	CE	0.18526	1.57609	3.83679	1.63051
37	PITPNA	CER	0.0765669	1.2243	0.518043	0.249507
37	PITPNA	DAG	-0.377361	1.86091	2.38592	0.219135
37	PITPNA	DCER	-0.5179	0.437079	0.0546571	0.0221045
37	PITPNA	FFA	-0.578403	0.243688	6.10915	1.64659
37	PITPNA	HCER	-0.321291	1.29467	1.30839	0.310212
37	PITPNA	LCER	-0.599814	1.08916	0.47969	0.302229
37	PITPNA	LPC	-1.23672	0.93312	0.219026	0.118472
37	PITPNA	LPE	-0.443793	0.946867	0.148917	0.0557373
37	PITPNA	PA	-0.620091	1.00646	0.54894	0.216614
37	PITPNA	PC	-0.766923	1.80348	34.2246	3.35627
37	PITPNA	PE	0.106028	1.31521	20.857	4.26187
37	PITPNA	PG	-0.398591	2.11475	0.948625	0.124722
37	PITPNA	PI	0.382635	0.857481	10.2086	0.497307
37	PITPNA	PS	-0.395444	1.94899	4.94442	1.39306
37	PITPNA	SM	-0.0391125	1.30379	6.46389	1.08413
37	PITPNA	TAG	1.31699	1.90254	6.74334	5.37181
38	PITPNM3	CE	0.311583	0.156263	2.83378	0.324683
38	PITPNM3	CER	0.0553381	1.0756	0.408225	0.067184
38	PITPNM3	DAG	-0.500178	0.822084	2.52717	0.229788
38	PITPNM3	DCER	-0.94301	NA	0.0385543	NA
38	PITPNM3	FFA	-0.494032	0.6456	6.72733	2.35978
38	PITPNM3	HCER	0.0315933	0.136445	1.32753	0.0484516
38	PITPNM3	LCER	0.439146	0.0951382	0.373321	0.0598822
38	PITPNM3	LPC	-0.037686	0.476525	0.248438	0.0167401
38	PITPNM3	LPE	-0.224727	0.606297	0.18646	0.0759352
38	PITPNM3	PA	-0.127752	0.513468	0.717598	0.438954
38	PITPNM3	PC	-0.76543	0.804946	35.2997	0.875877
38	PITPNM3	PE	0.277557	0.474181	22.0082	2.40264
38	PITPNM3	PG	0.536546	0.856396	0.913644	0.0556947
38	PITPNM3	PI	0.458581	0.825472	10.6876	0.0843339
38	PITPNM3	PS	1.02252	1.7666	5.39653	1.60367
38	PITPNM3	SM	0.643598	1.1011	6.71427	0.0848296
38	PITPNM3	TAG	-0.311048	0.57551	3.61094	1.40232
39	SCP2	CE	1.4362	3.69405	4.7408	2.01162
39	SCP2	CER	0.850268	2.88481	0.612185	0.183373
39	SCP2	DAG	0.264415	0.547324	2.64744	0.531561
39	SCP2	DCER	-0.138273	1.56281	0.0612826	0.0169851
39	SCP2	FFA	0.134359	1.44141	6.95293	3.13704
39	SCP2	HCER	-0.224432	0.4029	1.37833	0.0988167
39	SCP2	LCER	0.153734	1.62273	0.556281	0.2431
39	SCP2	LPC	-1.37945	0.46399	0.217863	0.0950825
39	SCP2	LPE	-0.68332	0.61472	0.135767	0.0352103
39	SCP2	PA	-0.41709	1.31371	0.526265	0.123529
39	SCP2	PC	-0.548262	1.31368	34.2333	1.39017
39	SCP2	PE	0.155412	1.06139	20.3155	2.3814
39	SCP2	PG	-0.213944	1.08736	0.956274	0.074917
39	SCP2	PI	0.77591	0.465357	10.5761	0.556876
39	SCP2	PS	0.160078	1.40654	5.30468	0.994882
39	SCP2	SM	-0.275282	0.0516865	6.48016	0.766866
39	SCP2	TAG	-0.106669	1.08738	4.30482	2.35839
40	SCP2D1	CE	-0.171245	0.588045	2.50235	0.170582
40	SCP2D1	CER	-0.714132	0.110071	0.343177	0.0158501
40	SCP2D1	DAG	-0.157654	1.22268	2.70018	0.906341
40	SCP2D1	DCER	-0.394438	0.56288	0.0471882	0.010275
40	SCP2D1	FFA	0.729426	2.21458	8.15731	4.24713
40	SCP2D1	HCER	0.00595139	0.253954	1.32083	0.0215923
40	SCP2D1	LCER	0.688149	0.516739	0.391183	0.0168077
40	SCP2D1	LPC	0.995524	0.138937	0.314312	0.00848118
40	SCP2D1	LPE	-0.0779928	0.401218	0.191162	0.0694251
40	SCP2D1	PA	-0.885466	1.22391	0.471543	0.0288661
40	SCP2D1	PC	-0.211706	0.983116	36.5584	1.14117
40	SCP2D1	PE	-0.388266	0.0315233	20.3309	1.15369
40	SCP2D1	PG	0.591828	0.0162007	0.922828	0.0352167
40	SCP2D1	PI	0.127511	0.955115	10.3583	0.151727
40	SCP2D1	PS	0.528131	0.261978	5.02716	0.3652
40	SCP2D1	SM	-0.109173	0.518328	6.2481	0.240984
40	SCP2D1	TAG	0.288517	0.0199394	4.11506	1.07364
41	HSD17B4	CE	-0.360274	0.0472165	2.45239	0.148599
41	HSD17B4	CER	-0.0556841	0.121002	0.395321	0.0093023
41	HSD17B4	DAG	1.3935	0.990328	3.19016	0.927796
41	HSD17B4	DCER	-0.1011	0.703501	0.0489805	0.00246996
41	HSD17B4	FFA	-0.187327	1.29871	6.79815	0.469569
41	HSD17B4	HCER	-0.853772	0.665247	1.12404	0.0845305
41	HSD17B4	LCER	0.468055	0.494651	0.375816	0.0187056
41	HSD17B4	LPC	-0.31769	0.320748	0.222635	0.0426265
41	HSD17B4	LPE	-0.0886431	0.559885	0.181916	0.0261729
41	HSD17B4	PA	0.178587	0.191961	0.753152	0.418824
41	HSD17B4	PC	-0.155413	1.08219	36.6756	1.35567
41	HSD17B4	PE	1.07799	0.869052	24.0761	1.0504
41	HSD17B4	PG	0.0293696	0.399965	0.860777	0.010439
41	HSD17B4	PI	-0.976697	1.2086	9.2419	0.191475
41	HSD17B4	PS	-0.963392	0.00356211	4.1538	0.405511
41	HSD17B4	SM	-0.374219	0.194665	6.10086	0.683245
41	HSD17B4	TAG	-0.263023	0.966619	3.34834	0.163978
42	STOML1	CE	-0.606626	0.0841812	2.31917	0.12664
42	STOML1	CER	-0.663361	0.0029915	0.346732	0.0238841
42	STOML1	DAG	1.10251	1.14619	3.10171	0.959755
42	STOML1	DCER	0.168743	1.03487	0.053608	0.0164051
42	STOML1	FFA	0.713264	1.02295	7.74258	0.970006
42	STOML1	HCER	-0.764823	0.377392	1.14633	0.0183241
42	STOML1	LCER	-0.012683	0.559503	0.341435	0.0929993
42	STOML1	LPC	1.06761	1.45941	0.332444	0.102465
42	STOML1	LPE	0.226571	0.864021	0.209029	0.0957165
42	STOML1	PA	-0.541241	0.554167	0.645056	0.394716
42	STOML1	PC	0.105133	0.872737	37.5392	3.24144
42	STOML1	PE	-0.25414	0.973635	20.6449	3.69893
42	STOML1	PG	0.42649	0.22282	0.905941	0.059687
42	STOML1	PI	0.596029	0.491988	10.7962	0.232861
42	STOML1	PS	-0.568912	0.571492	4.40909	0.775805
42	STOML1	SM	-0.733994	0.240127	5.85433	0.378855
42	STOML1	TAG	-0.0363061	0.814501	3.61224	0.0841744
43	HSDL2	CE	-0.304114	0.284573	2.45491	0.0254364
43	HSDL2	CER	-0.0271233	0.293759	0.395791	0.0418717
43	HSDL2	DAG	0.0745008	0.385998	2.74871	0.652531
43	HSDL2	DCER	-0.485247	0.154329	0.045812	0.00578281
43	HSDL2	FFA	-0.0736623	0.0195435	7.07047	1.79078
43	HSDL2	HCER	-0.252824	0.0969668	1.26381	0.0528651
43	HSDL2	LCER	1.40145	0.106019	0.44042	0.0590776
43	HSDL2	LPC	0.144321	0.878176	0.264249	0.0473232
43	HSDL2	LPE	-0.361987	0.297305	0.177491	0.0595875
43	HSDL2	PA	0.377976	0.447796	0.805329	0.490176
43	HSDL2	PC	-0.308092	0.74212	36.3673	0.60866
43	HSDL2	PE	0.671536	0.598455	23.0369	0.341833
43	HSDL2	PG	0.0206023	0.678881	0.863981	0.105682
43	HSDL2	PI	-0.412481	0.262077	9.73008	0.673745
43	HSDL2	PS	-0.127873	0.151519	4.64292	0.381036
43	HSDL2	SM	-0.382262	0.352505	6.07747	0.329773
43	HSDL2	TAG	-0.114316	0.407411	3.61438	0.471211
44	CPTP	CE	0.160786	0.0697006	2.74283	0.250784
44	CPTP	CER	1.00599	1.02872	0.474359	0.0911053
44	CPTP	DAG	0.817597	0.00194278	2.97501	0.575392
44	CPTP	DCER	0.276523	0.104799	0.0537897	0.00682389
44	CPTP	FFA	0.328529	0.480069	7.42042	1.42417
44	CPTP	HCER	-0.202649	0.112577	1.27498	0.0501399
44	CPTP	LCER	0.815281	0.108406	0.399541	0.0601964
44	CPTP	LPC	-0.402305	0.424192	0.222968	0.00713233
44	CPTP	LPE	-0.0394269	0.254203	0.18691	0.0407657
44	CPTP	PA	0.235832	1.60928	0.852031	0.683334
44	CPTP	PC	0.243801	1.17621	37.5877	1.46717
44	CPTP	PE	-0.513689	0.785458	20.0323	0.754105
44	CPTP	PG	-0.423744	0.23573	0.814423	0.0545387
44	CPTP	PI	-0.0644861	0.219638	10.0415	1.10183
44	CPTP	PS	-0.081834	0.165158	4.68214	0.572018
44	CPTP	SM	0.488351	0.954779	6.619	0.000777441
44	CPTP	TAG	-0.0860441	0.522662	3.62014	0.364141
45	GLTPD2	CE	0.454188	2.38551	2.91683	0.9647
45	GLTPD2	CER	1.19933	2.07489	1.00873	0.99228
45	GLTPD2	DAG	1.22672	0.941239	3.4606	0.848785
45	GLTPD2	DCER	1.31544	1.17232	0.116401	0.0945213
45	GLTPD2	FFA	1.72399	2.38227	9.49322	1.63539
45	GLTPD2	HCER	1.05316	1.61486	1.72998	0.494061
45	GLTPD2	LCER	1.10884	1.37624	0.611242	0.219161
45	GLTPD2	LPC	1.61556	1.23596	0.303103	0.126085
45	GLTPD2	LPE	0.533787	1.02864	0.208299	0.0970334
45	GLTPD2	PA	0.283246	1.90841	0.605052	0.141762
45	GLTPD2	PC	1.33757	1.77788	38.5207	4.56293
45	GLTPD2	PE	-0.345977	0.131517	20.5372	0.794748
45	GLTPD2	PG	0.0952467	0.695248	0.96724	0.176354
45	GLTPD2	PI	-0.774914	1.41292	9.35903	0.776797
45	GLTPD2	PS	0.795324	1.73101	5.22479	0.654041
45	GLTPD2	SM	0.856245	3.16256	6.60433	2.62548
45	GLTPD2	TAG	0.0677465	1.21298	3.70936	2.07375
46	GLTP	CE	0.530859	1.0507	4.01168	2.47552
46	GLTP	CER	-0.255009	0.579269	0.522955	0.295111
46	GLTP	DAG	-0.751477	0.326932	2.34978	0.342825
46	GLTP	DCER	0.782681	0.171293	0.0795425	0.0243236
46	GLTP	FFA	0.591135	1.69006	7.46429	0.561387
46	GLTP	HCER	-2.74117	0.812492	0.736292	0.238832
46	GLTP	LCER	-0.426521	0.64745	0.456838	0.225096
46	GLTP	LPC	0.526515	0.681856	0.324223	0.0642943
46	GLTP	LPE	-0.141814	0.967394	0.170965	0.08202
46	GLTP	PA	-0.242526	0.164414	0.616001	0.209539
46	GLTP	PC	0.111132	0.492531	36.9048	2.37323
46	GLTP	PE	-0.219447	1.04093	20.4631	3.01564
46	GLTP	PG	-0.323699	0.471014	0.873752	0.0594131
46	GLTP	PI	-0.965775	0.579765	9.29642	0.202097
46	GLTP	PS	-0.381102	0.530942	4.77792	0.865398
46	GLTP	SM	0.163963	0.490577	6.82852	0.498383
46	GLTP	TAG	0.569002	0.745498	4.14935	0.649474
47	PLEKHA8	CE	-1.42979	0.258972	1.87844	0.0816544
47	PLEKHA8	CER	-0.467981	0.895575	0.358313	0.0932924
47	PLEKHA8	DAG	-1.52343	0.252913	2.2168	0.348934
47	PLEKHA8	DCER	-0.612673	NA	0.0470647	NA
47	PLEKHA8	FFA	0.237049	1.10602	7.52311	3.0052
47	PLEKHA8	HCER	-0.419297	0.046926	1.22672	0.0615122
47	PLEKHA8	LCER	-0.407542	0.14187	0.314469	0.0447297
47	PLEKHA8	LPC	1.4941	1.40079	0.338142	0.0869076
47	PLEKHA8	LPE	2.38699	0.934689	0.289406	0.0545562
47	PLEKHA8	PA	-0.474749	1.57666	0.5241	0.0160948
47	PLEKHA8	PC	-2.76992	0.374143	30.814	1.32155
47	PLEKHA8	PE	2.42904	0.507645	27.4704	2.37403
47	PLEKHA8	PG	0.606322	1.01271	0.928345	0.146138
47	PLEKHA8	PI	-0.106064	0.399723	10.0608	0.469682
47	PLEKHA8	PS	-0.20853	1.27874	4.55257	0.292482
47	PLEKHA8	SM	-1.3574	0.345423	5.4717	0.715067
47	PLEKHA8	TAG	2.50066	1.86183	6.00907	0.03372
48	SEC14L1	CE	0.1453	0.969902	3.48041	1.46191
48	SEC14L1	CER	0.10385	0.617154	0.530314	0.189692
48	SEC14L1	DAG	-1.18759	1.30503	2.4487	0.792119
48	SEC14L1	DCER	0.0699925	0.580952	0.0647597	0.0232907
48	SEC14L1	FFA	0.36062	1.02357	7.82713	1.42603
48	SEC14L1	HCER	0.370843	0.836163	1.48421	0.110433
48	SEC14L1	LCER	-0.291274	1.04638	0.472874	0.189869
48	SEC14L1	LPC	0.472558	0.680735	0.276869	0.112677
48	SEC14L1	LPE	-0.332293	0.46723	0.145636	0.0583793
48	SEC14L1	PA	-1.18843	0.566817	0.507309	0.129153
48	SEC14L1	PC	0.0971201	0.577894	35.8757	1.69643
48	SEC14L1	PE	-0.886899	0.870297	19.4355	3.4936
48	SEC14L1	PG	-1.05245	1.82135	0.7734	0.151855
48	SEC14L1	PI	-0.0690623	0.267518	9.8241	0.793681
48	SEC14L1	PS	1.57601	1.28955	5.83258	1.18044
48	SEC14L1	SM	1.4024	0.189599	7.31853	0.810413
48	SEC14L1	TAG	-0.254461	0.541095	3.70197	0.970834
49	SEC14L2	CE	0.360335	1.11551	3.53229	1.6601
49	SEC14L2	CER	-3.9967e-05	0.159097	0.617608	0.37964
49	SEC14L2	DAG	-0.561247	0.441253	2.61886	0.32527
49	SEC14L2	DCER	0.0917677	NA	0.112709	NA
49	SEC14L2	FFA	-0.441324	1.03004	6.3697	0.222161
49	SEC14L2	HCER	0.155314	0.422939	1.47275	0.294142
49	SEC14L2	LCER	0.426603	0.887995	0.545084	0.361632
49	SEC14L2	LPC	0.931571	0.964514	0.287593	0.0686759
49	SEC14L2	LPE	-0.13316	0.444548	0.192975	0.0552623
49	SEC14L2	PA	0.189311	0.457195	0.681123	0.375666
49	SEC14L2	PC	0.714387	0.634541	37.775	3.32469
49	SEC14L2	PE	-0.847084	0.721423	19.15	2.39076
49	SEC14L2	PG	-0.177052	0.422967	0.897139	0.145036
49	SEC14L2	PI	0.701715	1.48124	11.0076	1.31058
49	SEC14L2	PS	0.823823	0.829316	5.40678	0.892833
49	SEC14L2	SM	-0.528343	0.274795	5.99911	0.21906
49	SEC14L2	TAG	-0.29938	0.25339	3.40881	0.312636
50	SEC14L3	CE	0.443827	0.920981	3.53845	1.63425
50	SEC14L3	CER	0.310348	0.464422	0.630648	0.343753
50	SEC14L3	DAG	-0.190509	1.05326	2.77598	0.704611
50	SEC14L3	DCER	0.531149	0.669824	0.0777652	0.0335958
50	SEC14L3	FFA	1.06695	1.58872	8.06945	0.302483
50	SEC14L3	HCER	0.251377	0.459574	1.48283	0.237529
50	SEC14L3	LCER	1.15254	0.482352	0.608047	0.352387
50	SEC14L3	LPC	0.872422	0.697275	0.288332	0.0682523
50	SEC14L3	LPE	-0.215207	1.23565	0.184572	0.0941748
50	SEC14L3	PA	0.0474865	0.751671	0.609051	0.2027
50	SEC14L3	PC	1.43106	1.19011	39.1632	3.78018
50	SEC14L3	PE	-2.36556	2.6683	15.2938	5.8116
50	SEC14L3	PG	0.299705	0.131251	0.950133	0.0962721
50	SEC14L3	PI	0.358894	0.996055	10.4745	1.43606
50	SEC14L3	PS	1.00081	1.13181	5.45549	0.461216
50	SEC14L3	SM	0.276086	1.29223	6.54605	1.22053
50	SEC14L3	TAG	0.115331	0.488912	3.85167	1.20677
51	SEC14L4	CE	0.368539	0.356996	2.8826	0.445635
51	SEC14L4	CER	0.59478	0.0596665	0.446006	0.0179827
51	SEC14L4	DAG	-0.991381	0.392995	2.4073	0.588858
51	SEC14L4	DCER	0.6049	1.58446	0.0555175	0.0103061
51	SEC14L4	FFA	-0.311776	1.18221	6.68667	0.556728
51	SEC14L4	HCER	-0.261036	0.128039	1.26171	0.0457404
51	SEC14L4	LCER	0.486954	0.861791	0.376032	0.113268
51	SEC14L4	LPC	1.71703	2.6421	0.386793	0.194391
51	SEC14L4	LPE	-0.32314	1.54325	0.190599	0.116116
51	SEC14L4	PA	0.0141178	1.39037	0.798105	0.6159
51	SEC14L4	PC	0.228621	0.184114	37.6846	0.826554
51	SEC14L4	PE	-0.131278	0.267237	20.9755	1.89874
51	SEC14L4	PG	-0.037771	0.470062	0.853277	0.0185045
51	SEC14L4	PI	0.4199	1.24841	10.6902	0.51393
51	SEC14L4	PS	-0.172042	0.692877	4.64866	0.877663
51	SEC14L4	SM	-0.190339	0.247984	6.20474	0.409962
51	SEC14L4	TAG	-0.330414	0.113415	3.45165	0.686085
52	SEC14L5	CE	-0.157543	0.906264	2.63861	0.659156
52	SEC14L5	CER	-0.109983	0.00252226	0.390514	0.0191451
52	SEC14L5	DAG	1.19589	0.793316	3.07167	0.343897
52	SEC14L5	DCER	0.0222662	0.98237	0.0499946	0.00515593
52	SEC14L5	FFA	-0.543622	1.16553	6.45432	0.516529
52	SEC14L5	HCER	-0.757268	0.140953	1.14989	0.0350262
52	SEC14L5	LCER	-0.440943	0.0213859	0.312042	0.053186
52	SEC14L5	LPC	-0.279903	0.6483	0.233222	0.0245406
52	SEC14L5	LPE	0.264478	1.31228	0.214818	0.116491
52	SEC14L5	PA	0.107277	0.516231	0.760447	0.468802
52	SEC14L5	PC	-0.0799594	0.323786	37.0375	1.92077
52	SEC14L5	PE	0.463547	0.0268566	22.4937	1.12057
52	SEC14L5	PG	-0.296914	0.101479	0.827566	0.0410557
52	SEC14L5	PI	-0.403784	0.320462	9.74495	0.611614
52	SEC14L5	PS	-0.784338	0.430678	4.24368	0.166145
52	SEC14L5	SM	-0.101671	0.68364	6.24744	0.134854
52	SEC14L5	TAG	0.250297	0.286472	4.12968	1.33224
53	SEC14L6	CE	-0.32424	0.621094	2.52176	0.472553
53	SEC14L6	CER	-0.162711	0.294289	0.385061	0.0430839
53	SEC14L6	DAG	-0.33285	1.30245	2.56595	0.0861744
53	SEC14L6	DCER	0.804784	NA	0.0640604	NA
53	SEC14L6	FFA	-0.920051	0.799216	6.11883	0.794227
53	SEC14L6	HCER	-0.397936	0.358031	1.23471	0.153019
53	SEC14L6	LCER	-0.0472988	0.485609	0.339081	0.0879024
53	SEC14L6	LPC	-0.109909	0.522761	0.24386	0.0187238
53	SEC14L6	LPE	0.107006	0.337679	0.198871	0.0699544
53	SEC14L6	PA	0.0480775	0.164503	0.727739	0.397543
53	SEC14L6	PC	0.580839	1.25765	38.6922	4.25953
53	SEC14L6	PE	-0.2008	0.534097	20.792	2.58003
53	SEC14L6	PG	-0.20209	0.756662	0.840297	0.112346
53	SEC14L6	PI	0.61593	1.16571	10.6498	1.94318
53	SEC14L6	PS	0.205836	1.11271	4.80419	0.16287
53	SEC14L6	SM	-0.516944	0.0449063	6.00083	0.519219
53	SEC14L6	TAG	0.158326	0.614628	3.85281	0.368449
54	MCF2L	CE	-0.166958	0.148769	2.54255	0.0733771
54	MCF2L	CER	-0.298239	0.0937707	0.375203	0.0283886
54	MCF2L	DAG	0.554527	0.356109	2.87962	0.444363
54	MCF2L	DCER	0.593738	0.947878	0.057998	0.0163603
54	MCF2L	FFA	-0.44161	0.378027	6.65436	1.3378
54	MCF2L	HCER	-0.417975	0.572724	1.23189	0.20104
54	MCF2L	LCER	0.732806	0.000713275	0.393878	0.0527208
54	MCF2L	LPC	-0.180216	0.578913	0.239495	0.0214201
54	MCF2L	LPE	0.0229918	1.29414	0.203833	0.111271
54	MCF2L	PA	0.316988	0.271241	0.783232	0.450501
54	MCF2L	PC	0.797024	0.874054	39.1418	3.42861
54	MCF2L	PE	-0.294954	0.370167	20.5767	0.288867
54	MCF2L	PG	-0.538919	0.354879	0.802477	0.0664849
54	MCF2L	PI	-0.447683	0.918819	9.57475	1.90207
54	MCF2L	PS	0.0949449	1.57125	4.72121	0.442749
54	MCF2L	SM	-0.146481	0.48559	6.25744	0.886052
54	MCF2L	TAG	-0.270736	0.135965	3.56347	0.966662
55	MCF2	CE	-0.825808	0.00883937	2.1898	0.0373884
55	MCF2	CER	-0.247684	0.206202	0.378718	0.0368478
55	MCF2	DAG	-0.375666	0.906964	2.56445	0.210283
55	MCF2	DCER	-0.336364	0.577617	0.0478154	0.0105495
55	MCF2	FFA	0.325558	1.3885	7.64735	3.31256
55	MCF2	HCER	-0.270317	0.494667	1.26452	0.185789
55	MCF2	LCER	-0.612904	0.650743	0.299504	0.100337
55	MCF2	LPC	-0.488588	0.162688	0.212203	0.0345914
55	MCF2	LPE	-0.122281	0.522659	0.180749	0.0272268
55	MCF2	PA	0.514174	0.00823119	0.80159	0.424375
55	MCF2	PC	-0.473259	0.642358	36.1689	2.55394
55	MCF2	PE	0.463081	0.278539	22.4845	1.89606
55	MCF2	PG	-0.0427881	0.11601	0.85499	0.044575
55	MCF2	PI	-0.00511747	0.942234	10.0301	1.83715
55	MCF2	PS	-0.103537	0.125604	4.6583	0.398219
55	MCF2	SM	0.415932	0.982566	6.63674	1.24404
55	MCF2	TAG	-0.341323	0.575426	3.57979	1.38999
56	RLBP1	CE	0.0874526	0.0634269	2.69076	0.164444
56	RLBP1	CER	0.167563	0.0119802	0.41241	0.017897
56	RLBP1	DAG	0.506513	1.26418	2.83615	0.150348
56	RLBP1	DCER	1.22908	0.810833	0.0628897	0.000871782
56	RLBP1	FFA	0.8315	1.98784	8.23261	4.04302
56	RLBP1	HCER	-0.143727	0.0407173	1.28881	0.0672453
56	RLBP1	LCER	0.156997	0.19481	0.353564	0.0672913
56	RLBP1	LPC	-0.961495	0.227231	0.179197	0.0468238
56	RLBP1	LPE	-0.305493	0.69441	0.183645	0.0784089
56	RLBP1	PA	0.632672	0.171769	0.812898	0.409475
56	RLBP1	PC	-0.288781	0.446399	36.4513	0.0813903
56	RLBP1	PE	-0.201886	0.355296	20.7939	2.12607
56	RLBP1	PG	-0.218842	0.0393401	0.835432	0.0264903
56	RLBP1	PI	0.148198	0.201237	10.3038	0.62374
56	RLBP1	PS	0.406988	0.235692	4.97423	0.650716
56	RLBP1	SM	0.233614	0.373504	6.49888	0.839046
56	RLBP1	TAG	-0.887833	0.929586	3.08948	1.53304
57	TTPA	CE	-0.644744	0.314779	2.30963	0.224231
57	TTPA	CER	-0.243399	0.503739	0.366335	0.0648314
57	TTPA	DAG	0.397329	1.16954	2.87061	0.183455
57	TTPA	DCER	-0.0360885	0.102347	0.055187	0.0100126
57	TTPA	FFA	0.0374008	1.23441	8.34609	3.3821
57	TTPA	HCER	-0.236627	0.378378	1.21596	0.134518
57	TTPA	LCER	-0.397699	0.42874	0.356466	0.0540702
57	TTPA	LPC	-1.01888	0.484871	0.171325	0.048908
57	TTPA	LPE	0.109225	0.3725	0.172715	0.0426004
57	TTPA	PA	1.21954	0.980318	0.933023	0.504378
57	TTPA	PC	-0.29765	1.37925	34.7474	4.50844
57	TTPA	PE	0.179384	0.889983	22.5913	2.67111
57	TTPA	PG	-0.522978	1.02285	0.818177	0.125501
57	TTPA	PI	-0.0535282	0.962048	9.81278	1.61525
57	TTPA	PS	-0.600854	0.241476	4.29778	0.178723
57	TTPA	SM	0.153582	0.546735	6.07302	1.12391
57	TTPA	TAG	0.638708	1.10416	4.86223	1.30565
58	CLVS2	CE	0.0274565	0.953308	2.58092	0.338604
58	CLVS2	CER	-0.00850452	0.872253	0.394768	0.0874815
58	CLVS2	DAG	0.925594	0.187502	3.01536	0.641544
58	CLVS2	DCER	1.64127	0.0204337	0.0680448	0.00830433
58	CLVS2	FFA	0.550551	0.986329	7.82533	2.96134
58	CLVS2	HCER	0.339908	0.303761	1.4004	0.152409
58	CLVS2	LCER	0.386089	1.2489	0.370713	0.0337595
58	CLVS2	LPC	-0.682701	0.325749	0.197529	0.0489905
58	CLVS2	LPE	-0.0678384	0.00417544	0.187918	0.0514486
58	CLVS2	PA	-0.149147	0.739026	0.727794	0.477241
58	CLVS2	PC	-0.401536	0.272745	36.2133	0.453579
58	CLVS2	PE	-0.0813756	0.184942	21.1142	0.747921
58	CLVS2	PG	-1.17438	0.228677	0.733555	0.0480064
58	CLVS2	PI	0.029988	0.13041	10.1744	0.720795
58	CLVS2	PS	-0.212842	0.374374	4.61247	0.685996
58	CLVS2	SM	0.285877	0.562613	6.53888	0.964504
58	CLVS2	TAG	0.0498358	0.104619	3.84443	0.848983
59	CLVS1	CE	-0.462854	0.0366897	2.38837	0.0844754
59	CLVS1	CER	-0.691005	0.56689	0.342086	0.0692117
59	CLVS1	DAG	-0.365907	0.429121	2.60889	0.639117
59	CLVS1	DCER	-0.472901	0.421715	0.0453511	0.000263008
59	CLVS1	FFA	-0.453907	0.881073	6.79687	2.60772
59	CLVS1	HCER	-0.270784	0.282412	1.26275	0.137995
59	CLVS1	LCER	-0.387826	0.244313	0.31553	0.0716285
59	CLVS1	LPC	-0.664928	0.166605	0.200062	0.037769
59	CLVS1	LPE	0.0718189	0.209933	0.196129	0.0635892
59	CLVS1	PA	0.500842	0.116301	0.806944	0.445323
59	CLVS1	PC	0.574788	0.0746939	38.5208	1.51809
59	CLVS1	PE	-0.554987	0.96918	19.9323	1.21844
59	CLVS1	PG	0.366154	0.690548	0.901241	0.109596
59	CLVS1	PI	1.03765	2.67091	10.9344	3.41487
59	CLVS1	PS	-0.275892	0.295788	4.54982	0.28443
59	CLVS1	SM	-0.138711	0.857303	6.27482	1.12633
59	CLVS1	TAG	0.162865	0.287267	3.92371	0.706903
60	TTPAL	CE	0.00973005	0.312342	2.62629	0.0132382
60	TTPAL	CER	-0.579259	0.167314	0.352651	0.0366328
60	TTPAL	DAG	1.08406	0.21816	3.0671	0.661171
60	TTPAL	DCER	0.00105085	0.0684835	0.0507087	0.00443235
60	TTPAL	FFA	0.858958	0.596648	8.08918	2.64328
60	TTPAL	HCER	0.250559	0.0692484	1.37735	0.0670248
60	TTPAL	LCER	-0.627236	0.439189	0.29939	0.0243527
60	TTPAL	LPC	0.599418	1.77288	0.302878	0.116268
60	TTPAL	LPE	1.15425	2.20095	0.262788	0.17254
60	TTPAL	PA	0.222929	0.866586	0.803321	0.546861
60	TTPAL	PC	0.539122	0.52969	38.3577	0.108805
60	TTPAL	PE	-1.1388	0.341564	18.4333	0.406046
60	TTPAL	PG	-0.194986	0.684189	0.840784	0.104595
60	TTPAL	PI	-0.574786	0.0537404	9.53042	1.03304
60	TTPAL	PS	0.134577	1.10978	4.84596	1.14768
60	TTPAL	SM	0.350265	0.406186	6.57521	0.867888
60	TTPAL	TAG	0.37259	0.0619557	4.18494	1.02344
61	NF1	CE	0.023778	0.322532	2.63319	0.0100154
61	NF1	CER	-0.65553	0.252639	0.348429	0.00406431
61	NF1	DAG	0.692021	1.19007	2.8979	0.185572
61	NF1	DCER	-0.434115	0.66394	0.0455114	0.00273632
61	NF1	FFA	-0.639174	0.102499	6.51376	1.77499
61	NF1	HCER	-0.322279	0.278049	1.24674	0.0110039
61	NF1	LCER	-1.23538	0.104028	0.256708	0.0487135
61	NF1	LPC	-0.488489	0.763223	0.207257	0.075828
61	NF1	LPE	-0.180269	0.16436	0.18142	0.0422206
61	NF1	PA	0.771382	0.335131	0.869732	0.518839
61	NF1	PC	0.154449	0.282606	37.5749	1.88777
61	NF1	PE	0.298649	1.1236	22.0446	4.05055
61	NF1	PG	-1.06201	0.143072	0.744227	0.00883444
61	NF1	PI	-0.64351	1.11864	9.57741	0.165556
61	NF1	PS	-0.705142	0.715389	4.33387	0.850712
61	NF1	SM	0.198049	0.439559	6.44889	0.312235
61	NF1	TAG	0.321088	0.341442	4.07544	0.715214
62	ARHGAP8	CE	1.09528	1.23835	4.37069	1.58166
62	ARHGAP8	CER	0.407471	1.25618	0.594803	0.191389
62	ARHGAP8	DAG	0.488537	1.24402	2.95404	0.625595
62	ARHGAP8	DCER	-0.457683	0.331471	0.0596479	0.0159176
62	ARHGAP8	FFA	0.738484	1.70183	9.2312	5.5118
62	ARHGAP8	HCER	-0.579411	0.0698842	1.29609	0.0788159
62	ARHGAP8	LCER	2.31811	1.55774	0.803435	0.197354
62	ARHGAP8	LPC	0.246791	1.1393	0.232152	0.0918453
62	ARHGAP8	LPE	-0.327613	0.725897	0.159387	0.0482125
62	ARHGAP8	PA	0.490322	1.64948	0.572328	0.207728
62	ARHGAP8	PC	0.252748	1.0942	35.7021	2.34295
62	ARHGAP8	PE	-1.18397	0.942039	17.9698	2.42652
62	ARHGAP8	PG	0.191013	0.834043	0.935911	0.104738
62	ARHGAP8	PI	-0.132996	0.74512	10.0685	1.06181
62	ARHGAP8	PS	0.226885	1.02033	5.03615	0.442485
62	ARHGAP8	SM	0.100559	1.01052	6.83947	1.09927
62	ARHGAP8	TAG	-0.437216	1.04322	3.1744	0.943959
63	ARHGAP1	CE	-0.228383	0.43513	2.46191	0.126831
63	ARHGAP1	CER	-0.24405	0.285149	0.398457	0.0150718
63	ARHGAP1	DAG	-0.280526	0.32147	2.62622	0.619376
63	ARHGAP1	DCER	-0.854858	0.250548	0.0493889	0.0164665
63	ARHGAP1	FFA	-0.614635	0.222333	6.51907	1.85375
63	ARHGAP1	HCER	0.745016	0.395192	1.4902	0.182375
63	ARHGAP1	LCER	-0.012914	0.183976	0.345973	0.0467391
63	ARHGAP1	LPC	-0.164703	0.6259	0.175617	0.016734
63	ARHGAP1	LPE	0.530462	1.01907	0.20101	0.0231958
63	ARHGAP1	PA	1.10457	1.58858	0.613261	0.0672928
63	ARHGAP1	PC	0.933274	0.819742	38.2092	1.58412
63	ARHGAP1	PE	-0.345068	0.121186	21.1997	0.146478
63	ARHGAP1	PG	0.653038	0.511053	0.897241	0.140846
63	ARHGAP1	PI	0.0975922	0.802554	10.2809	1.48745
63	ARHGAP1	PS	0.112074	0.347869	4.62577	0.0682257
63	ARHGAP1	SM	0.0759651	0.770691	6.27226	1.28012
63	ARHGAP1	TAG	-0.538504	0.330357	3.63384	0.243517
64	BNIP2	CE	0.0794456	0.168264	2.6773	0.105018
64	BNIP2	CER	-0.299727	0.108978	0.37502	0.0296047
64	BNIP2	DAG	-0.613488	0.491076	2.53146	0.643663
64	BNIP2	DCER	0.236457	0.43538	0.0528133	0.00104851
64	BNIP2	FFA	-0.975082	0.469302	6.21929	2.06315
64	BNIP2	HCER	0.180386	0.483101	1.3659	0.190275
64	BNIP2	LCER	0.601805	0.926987	0.383989	0.117628
64	BNIP2	LPC	-0.400352	0.692948	0.213889	0.0695486
64	BNIP2	LPE	1.23709	0.53658	0.241522	0.0514086
64	BNIP2	PA	0.233923	0.722731	0.706095	0.259641
64	BNIP2	PC	-0.250768	0.310925	36.5574	0.405276
64	BNIP2	PE	0.517037	0.336068	22.6377	0.332585
64	BNIP2	PG	-0.355331	0.136889	0.821411	0.0444199
64	BNIP2	PI	0.402953	0.3471	10.512	1.1395
64	BNIP2	PS	-0.0118104	0.576038	4.73912	0.82059
64	BNIP2	SM	0.433481	0.105753	6.61889	0.67964
64	BNIP2	TAG	-0.450849	0.0225331	3.3462	0.730807
65	PRUNE2	CE	-0.0949554	0.217736	2.57648	0.0475915
65	PRUNE2	CER	-0.0421591	0.476742	0.397926	0.0189606
65	PRUNE2	DAG	0.276454	1.23631	2.76328	0.145053
65	PRUNE2	DCER	-0.568879	0.0479563	0.0448214	0.00449011
65	PRUNE2	FFA	0.217424	0.203706	7.39223	2.08813
65	PRUNE2	HCER	-0.197517	0.0749089	1.27643	0.0587012
65	PRUNE2	LCER	1.26564	0.351199	0.430749	0.0763962
65	PRUNE2	LPC	0.532068	1.16995	0.293281	0.0737548
65	PRUNE2	LPE	0.868207	0.459083	0.23408	0.0892836
65	PRUNE2	PA	-0.0276836	0.533094	0.736994	0.455013
65	PRUNE2	PC	0.493724	0.514928	38.3916	2.51614
65	PRUNE2	PE	0.447584	0.156856	22.4566	0.791313
65	PRUNE2	PG	-0.809407	0.0861547	0.771651	0.0169069
65	PRUNE2	PI	-1.58705	0.84312	8.40409	2.05326
65	PRUNE2	PS	-1.464	1.11882	3.81526	0.292654
65	PRUNE2	SM	0.411838	0.682857	6.57869	0.169527
65	PRUNE2	TAG	-0.519227	0.768224	3.43586	1.51626
66	BNIPL	CE	-0.412246	0.0714951	2.39382	0.0462466
66	BNIPL	CER	-0.886938	0.590141	0.351369	0.0486322
66	BNIPL	DAG	-0.168922	1.50347	2.64212	1.08492
66	BNIPL	DCER	1.24959	0.6574	0.0767493	0.0318091
66	BNIPL	FFA	-0.39331	0.542051	6.40034	0.784101
66	BNIPL	HCER	-0.724522	0.299373	1.20374	0.073844
66	BNIPL	LCER	0.123576	0.232125	0.359878	0.0493067
66	BNIPL	LPC	-0.316587	0.606594	0.168649	0.0108837
66	BNIPL	LPE	0.753573	1.27353	0.209287	0.0150137
66	BNIPL	PA	-0.721255	0.453631	0.44037	0.119617
66	BNIPL	PC	-0.263718	0.800285	35.5333	1.3605
66	BNIPL	PE	0.923127	0.882981	24.5162	2.16267
66	BNIPL	PG	-0.276312	0.20696	0.800132	0.0950822
66	BNIPL	PI	0.866717	1.68005	10.5576	0.147863
66	BNIPL	PS	-1.22957	0.263457	3.95316	0.468372
66	BNIPL	SM	-0.472695	0.703445	5.83108	0.346828
66	BNIPL	TAG	0.137344	0.659631	4.56211	0.732798
67	GDAP2	CE	1.00637	0.987819	3.32641	0.218976
67	GDAP2	CER	0.247144	0.617038	0.423294	0.0420834
67	GDAP2	DAG	-0.572498	0.937974	2.50656	0.104388
67	GDAP2	DCER	-0.246973	0.642765	0.0488699	0.00798651
67	GDAP2	FFA	-1.22277	0.519706	6.34004	1.67844
67	GDAP2	HCER	-0.689002	0.246866	1.12216	0.032912
67	GDAP2	LCER	-0.291416	0.753364	0.37067	0.105
67	GDAP2	LPC	-0.527692	0.888825	0.17142	0.028106
67	GDAP2	LPE	1.05588	1.33281	0.214401	0.0263033
67	GDAP2	PA	-0.778867	0.711937	0.612853	0.327427
67	GDAP2	PC	-0.448965	1.0061	34.3928	5.08321
67	GDAP2	PE	0.808188	0.719746	24.3623	3.63517
67	GDAP2	PG	-0.510398	0.807936	0.83022	0.0941185
67	GDAP2	PI	0.212573	1.43245	9.96653	0.37413
67	GDAP2	PS	-0.840143	0.548694	4.17636	0.620399
67	GDAP2	SM	0.537071	0.888776	6.2823	1.14384
67	GDAP2	TAG	0.0665419	1.31772	4.85278	3.07797
68	SESTD1	CE	0.661142	0.369361	3.26696	0.3861
68	SESTD1	CER	-0.107885	0.497939	0.387485	0.0490831
68	SESTD1	DAG	-0.299466	1.16353	2.53351	0.542556
68	SESTD1	DCER	-0.373032	1.26802	0.0471735	0.0175446
68	SESTD1	FFA	-0.961661	0.306518	6.61402	1.46616
68	SESTD1	HCER	-0.552714	0.602926	1.09649	0.306988
68	SESTD1	LCER	0.0759276	1.49029	0.377207	0.0427664
68	SESTD1	LPC	-0.179452	1.15817	0.185407	0.017223
68	SESTD1	LPE	1.28937	1.24114	0.232483	0.0546941
68	SESTD1	PA	-0.242527	1.99607	0.688513	0.433427
68	SESTD1	PC	-1.07822	1.34981	32.7182	6.40793
68	SESTD1	PE	1.04654	1.453	25.4744	6.13044
68	SESTD1	PG	-0.27599	0.806828	0.865084	0.123356
68	SESTD1	PI	-0.518085	1.52183	9.64494	1.43683
68	SESTD1	PS	-0.242699	1.55634	4.45215	0.940964
68	SESTD1	SM	-0.368029	1.24757	5.63992	1.75107
68	SESTD1	TAG	0.471375	1.89667	5.77606	4.36101
69	ATCAY	CE	-0.669223	0.0585942	2.24451	0.00237726
69	ATCAY	CER	-0.486605	0.404205	0.382243	0.0373797
69	ATCAY	DAG	0.0258507	1.2341	2.72623	0.968178
69	ATCAY	DCER	-0.715194	0.328235	0.0497303	0.00989388
69	ATCAY	FFA	0.50899	1.35782	7.4655	0.539676
69	ATCAY	HCER	0.542566	0.913051	1.41106	0.0824362
69	ATCAY	LCER	-0.581485	0.460165	0.301001	0.0857963
69	ATCAY	LPC	-0.00534247	0.36105	0.189301	0.0367618
69	ATCAY	LPE	0.862016	0.936141	0.217029	0.0323833
69	ATCAY	PA	-0.37027	0.262712	0.472073	0.0513156
69	ATCAY	PC	-0.18987	1.89211	35.4957	4.64406
69	ATCAY	PE	0.430273	1.42653	23.5767	4.03055
69	ATCAY	PG	-0.667612	0.307525	0.761063	0.0991054
69	ATCAY	PI	0.686528	1.8576	10.4058	0.318718
69	ATCAY	PS	-0.931178	0.174763	4.10091	0.402236
69	ATCAY	SM	0.125195	0.170064	6.24733	0.947879
69	ATCAY	TAG	-0.318359	1.00437	3.95383	1.17275
70	TRIO	CE	-0.636443	0.18675	2.29056	0.148691
70	TRIO	CER	-0.095992	0.218944	0.412352	0.0260966
70	TRIO	DAG	0.472056	0.598502	2.91937	0.693371
70	TRIO	DCER	0.75663	0.768123	0.0708417	0.0307968
70	TRIO	FFA	0.153785	1.01929	7.0579	0.667022
70	TRIO	HCER	0.603359	1.25223	1.4124	0.144151
70	TRIO	LCER	0.340178	0.472039	0.37717	0.0350418
70	TRIO	LPC	-0.0545235	0.418028	0.185632	0.0317871
70	TRIO	LPE	2.28573	0.596459	0.295304	0.126304
70	TRIO	PA	-0.9707	0.251973	0.414475	0.0970938
70	TRIO	PC	-0.810103	1.04278	34.3308	1.82008
70	TRIO	PE	0.494633	0.422708	23.4177	1.04862
70	TRIO	PG	-0.211417	0.124602	0.804108	0.0623319
70	TRIO	PI	-0.571727	0.900386	9.80368	1.40546
70	TRIO	PS	-0.607774	0.056299	4.2663	0.265303
70	TRIO	SM	0.259982	0.184844	6.32513	0.979998
70	TRIO	TAG	0.907859	0.904708	5.61635	1.1136
71	PTPN9	CE	-0.434758	0.551182	3.33643	1.14958
71	PTPN9	CER	0.0407374	0.852612	0.875722	0.769842
71	PTPN9	DAG	-0.0320909	0.722671	2.63927	0.253725
71	PTPN9	DCER	0.3613	0.757284	0.0962136	0.0676657
71	PTPN9	FFA	0.718399	0.665521	7.91299	1.88652
71	PTPN9	HCER	0.0903385	0.62857	1.46513	0.197249
71	PTPN9	LCER	-0.1191	0.729284	0.5534	0.292862
71	PTPN9	LPC	0.265716	0.523259	0.277241	0.0604125
71	PTPN9	LPE	1.63285	0.794472	0.246562	0.0576557
71	PTPN9	PA	0.110198	1.04119	0.693021	0.470778
71	PTPN9	PC	0.708765	2.08887	37.9111	6.55936
71	PTPN9	PE	-1.78056	3.23177	15.9978	8.48969
71	PTPN9	PG	0.694021	1.28082	1.00945	0.16068
71	PTPN9	PI	0.788183	1.21046	10.8648	1.00866
71	PTPN9	PS	0.549954	0.840743	5.40125	0.794392
71	PTPN9	SM	0.692619	0.598074	7.214	0.749899
71	PTPN9	TAG	-0.153067	1.11673	3.50562	0.764456
72	MOSPD2	CE	-1.23975	0.600027	2.74625	1.19921
72	MOSPD2	CER	-0.144445	0.852078	0.836647	0.737589
72	MOSPD2	DAG	0.0907754	0.725987	2.73949	0.612804
72	MOSPD2	DCER	0.145654	1.13182	0.10786	0.076217
72	MOSPD2	FFA	-0.120885	1.02225	6.58211	1.5159
72	MOSPD2	HCER	0.251928	0.417022	1.52681	0.265637
72	MOSPD2	LCER	0.105672	0.4279	0.568008	0.279665
72	MOSPD2	LPC	-0.500462	0.504048	0.23275	0.0775092
72	MOSPD2	LPE	1.37002	1.15319	0.225856	0.0366814
72	MOSPD2	PA	-0.083445	0.735679	0.63687	0.352301
72	MOSPD2	PC	-0.0288574	0.960939	36.0453	3.58018
72	MOSPD2	PE	0.203842	0.811288	21.0225	2.48712
72	MOSPD2	PG	-0.169898	0.860719	0.923083	0.18597
72	MOSPD2	PI	0.146372	1.31766	9.93088	1.09599
72	MOSPD2	PS	-0.159409	0.796515	4.93515	0.855161
72	MOSPD2	SM	1.02745	0.552756	7.52544	0.997736
72	MOSPD2	TAG	-0.12736	0.907144	3.44199	0.974811
73	MCF2L2	CE	0.0782352	0.157473	2.67756	0.110785
73	MCF2L2	CER	0.0375201	0.171594	0.402914	0.00449505
73	MCF2L2	DAG	-1.04324	1.30762	2.3381	0.0405835
73	MCF2L2	DCER	-0.537527	0.910339	0.0460366	0.0136434
73	MCF2L2	FFA	-0.754713	0.321159	6.34481	1.31823
73	MCF2L2	HCER	-0.229101	0.304661	1.27231	0.14366
73	MCF2L2	LCER	-0.711242	0.219429	0.293353	0.0398143
73	MCF2L2	LPC	-0.0429018	0.777606	0.250563	0.037329
73	MCF2L2	LPE	0.980846	1.29652	0.246767	0.128857
73	MCF2L2	PA	0.749659	0.0486025	0.847899	0.464098
73	MCF2L2	PC	0.221276	0.269565	37.7279	1.87535
73	MCF2L2	PE	0.000428356	0.136859	21.3134	1.56073
73	MCF2L2	PG	-0.128472	0.158157	0.844708	0.0143891
73	MCF2L2	PI	0.25017	0.0999297	10.3789	0.914658
73	MCF2L2	PS	0.353216	0.130673	4.93843	0.584471
73	MCF2L2	SM	0.0366407	0.53361	6.37715	0.929211
73	MCF2L2	TAG	-0.058409	0.272566	3.69915	0.63249
74	KIAA1755	CE	0.129394	0.493386	2.66538	0.082768
74	KIAA1755	CER	0.0323045	0.307261	0.422886	0.0341941
74	KIAA1755	DAG	-0.245506	0.158747	2.64411	0.55285
74	KIAA1755	DCER	-0.615946	0.2738	0.0511064	0.0110591
74	KIAA1755	FFA	-0.694344	0.0939406	6.28998	1.51666
74	KIAA1755	HCER	0.542252	0.579617	1.42122	0.0181243
74	KIAA1755	LCER	-0.269105	0.577939	0.305737	0.0124071
74	KIAA1755	LPC	1.08279	0.745104	0.233727	0.0667021
74	KIAA1755	LPE	1.0258	0.100792	0.231349	0.0736996
74	KIAA1755	PA	0.276042	0.766137	0.534312	0.0070975
74	KIAA1755	PC	0.69426	0.0468269	37.61	0.388045
74	KIAA1755	PE	-0.647148	0.217892	20.3838	0.303353
74	KIAA1755	PG	-0.109793	0.00352019	0.815481	0.0770023
74	KIAA1755	PI	0.395965	0.201313	10.3836	0.8233
74	KIAA1755	PS	0.875551	1.29146	4.93112	0.801498
74	KIAA1755	SM	1.2902	0.362739	6.86167	0.850563
74	KIAA1755	TAG	-0.110361	0.304752	4.21461	0.235352
75	KALRN	CE	0.000349352	0.0749016	2.65183	0.22233
75	KALRN	CER	-0.0401055	0.477665	0.417892	0.0470521
75	KALRN	DAG	0.864184	0.654276	3.07426	0.696636
75	KALRN	DCER	0.135307	0.0516527	0.0613123	0.0187944
75	KALRN	FFA	-0.385064	0.00964137	6.78662	1.78238
75	KALRN	HCER	0.575635	1.27088	1.40648	0.149448
75	KALRN	LCER	-0.0115694	0.645325	0.332657	0.00493047
75	KALRN	LPC	-0.420093	0.455399	0.187347	0.0579938
75	KALRN	LPE	-0.143454	0.384887	0.181133	0.0773239
75	KALRN	PA	-0.246217	0.240385	0.484582	0.054722
75	KALRN	PC	0.396625	0.355419	36.9218	1.12233
75	KALRN	PE	0.130145	0.289591	22.5416	0.784145
75	KALRN	PG	-0.423903	0.0960874	0.784213	0.0814382
75	KALRN	PI	-0.9699	0.308943	9.37456	0.431755
75	KALRN	PS	0.159428	0.0315731	4.63635	0.217492
75	KALRN	SM	0.625352	0.235193	6.53695	1.0729
75	KALRN	TAG	-0.548779	0.34955	3.62048	0.268948
76	PDZD8	CE	2.12131	0.684084	3.76344	0.171063
76	PDZD8	CER	1.27122	0.606032	0.502399	0.0405256
76	PDZD8	DAG	-0.129934	0.757967	2.64782	0.273234
76	PDZD8	DCER	1.2402	0.940731	0.0648039	0.0176115
76	PDZD8	FFA	-0.99143	0.708456	6.05783	0.868419
76	PDZD8	HCER	0.649247	0.525148	1.46353	0.0293433
76	PDZD8	LCER	0.531317	0.900003	0.379095	0.115861
76	PDZD8	LPC	-0.483306	0.856268	0.220969	0.0354666
76	PDZD8	LPE	-0.244821	0.0956966	0.180901	0.0526934
76	PDZD8	PA	-0.429698	0.526752	0.663599	0.403665
76	PDZD8	PC	0.587501	0.485256	38.6048	2.47237
76	PDZD8	PE	-0.0399286	0.549106	21.2001	2.60965
76	PDZD8	PG	-0.580119	0.451835	0.794938	0.0207124
76	PDZD8	PI	-0.832288	0.241183	9.29382	0.779904
76	PDZD8	PS	0.192037	1.01753	4.8765	1.0974
76	PDZD8	SM	0.308152	1.13805	6.57239	1.33715
76	PDZD8	TAG	-0.997543	0.373354	2.71307	0.148868
77	ESYT2	CE	-0.0144088	0.376217	2.59385	0.0454893
77	ESYT2	CER	0.59234	0.0797049	0.466217	0.0210287
77	ESYT2	DAG	-0.105818	0.803085	2.72301	0.162881
77	ESYT2	DCER	1.05868	0.266801	0.0734064	0.0259853
77	ESYT2	FFA	0.128068	0.867626	7.11401	0.903757
77	ESYT2	HCER	0.0580312	0.545391	1.32884	0.0411908
77	ESYT2	LCER	0.464338	0.119214	0.401396	0.0818656
77	ESYT2	LPC	0.401124	1.3994	0.248458	0.1407
77	ESYT2	LPE	0.901127	0.0990412	0.227189	0.0809403
77	ESYT2	PA	-1.07073	0.258098	0.40206	0.0451479
77	ESYT2	PC	-0.520813	0.37125	34.8707	1.29578
77	ESYT2	PE	0.249141	0.887589	22.9788	2.47752
77	ESYT2	PG	-0.304188	0.264094	0.797746	0.10046
77	ESYT2	PI	0.255355	1.07316	10.427	1.72107
77	ESYT2	PS	0.0603982	0.297573	4.59882	0.0965734
77	ESYT2	SM	0.692565	0.381037	6.52085	0.734965
77	ESYT2	TAG	-0.106721	0.565094	4.22765	0.589212
78	ESYT3	CE	-0.781243	0.214553	2.19676	0.0688376
78	ESYT3	CER	-0.270652	0.0841692	0.378154	0.0140719
78	ESYT3	DAG	-0.855316	0.372966	2.45029	0.590853
78	ESYT3	DCER	-1.06862	0.121976	0.0396304	0.00424482
78	ESYT3	FFA	0.688857	0.725997	7.75444	1.26422
78	ESYT3	HCER	-0.590674	0.122266	1.18754	0.0418541
78	ESYT3	LCER	0.528348	0.239811	0.379424	0.0698262
78	ESYT3	LPC	0.582999	1.63743	0.300634	0.106696
78	ESYT3	LPE	1.00506	0.807368	0.228656	0.0350431
78	ESYT3	PA	-0.374323	0.95373	0.70031	0.488111
78	ESYT3	PC	0.118398	0.117111	37.4694	1.49488
78	ESYT3	PE	0.092509	0.438833	21.5624	0.0940523
78	ESYT3	PG	-0.380883	0.514813	0.816153	0.0259627
78	ESYT3	PI	-0.168106	0.362127	9.91994	1.27006
78	ESYT3	PS	-1.01341	0.50873	4.1051	0.102623
78	ESYT3	SM	0.0967213	0.47912	6.41409	0.898062
78	ESYT3	TAG	0.4237	0.756104	4.09707	0.330346
79	ESYT1	CE	0.336177	0.119939	2.84427	0.308806
79	ESYT1	CER	0.320299	0.841536	0.428178	0.0509515
79	ESYT1	DAG	0.918195	0.917302	2.97883	0.286984
79	ESYT1	DCER	0.0810106	0.302414	0.0513114	0.00213093
79	ESYT1	FFA	0.582355	0.823668	7.63475	1.13927
79	ESYT1	HCER	-0.76205	0.353731	1.14714	0.0129534
79	ESYT1	LCER	0.193065	0.313905	0.355983	0.0755379
79	ESYT1	LPC	-0.533515	0.20736	0.21217	0.00992155
79	ESYT1	LPE	-0.3034	0.323665	0.180356	0.0618376
79	ESYT1	PA	-0.0399718	1.05151	0.767127	0.547614
79	ESYT1	PC	-0.271854	1.15676	36.396	1.55936
79	ESYT1	PE	0.15611	0.533654	21.7264	0.150077
79	ESYT1	PG	0.773204	0.554857	0.94029	0.0213999
79	ESYT1	PI	-0.0178624	0.282492	10.1402	0.573154
79	ESYT1	PS	0.174454	1.65314	4.8901	1.47241
79	ESYT1	SM	0.763922	0.334774	6.81737	0.417477
79	ESYT1	TAG	-1.38744	0.503011	2.48945	0.892258
80	TEX2	CE	0.435039	1.04795	2.97973	0.754818
80	TEX2	CER	0.395385	0.831173	0.442769	0.0482628
80	TEX2	DAG	1.26377	0.786481	3.42319	0.739853
80	TEX2	DCER	1.11787	1.36103	0.0735403	0.00822167
80	TEX2	FFA	0.393293	0.768994	8.14086	1.17606
80	TEX2	HCER	-0.588292	0.307801	1.16996	0.0617619
80	TEX2	LCER	0.298441	0.42198	0.433677	0.114215
80	TEX2	LPC	-0.362257	0.910152	0.206207	0.0701197
80	TEX2	LPE	0.0964763	1.28372	0.185441	0.114244
80	TEX2	PA	0.217119	1.12017	0.763213	0.376482
80	TEX2	PC	-0.47903	0.562921	34.4401	3.80665
80	TEX2	PE	0.229987	0.843498	22.8883	3.85315
80	TEX2	PG	-0.615427	0.520103	0.829724	0.118898
80	TEX2	PI	-0.377505	0.672226	9.60939	1.09728
80	TEX2	PS	-0.261494	1.28651	4.52833	1.14695
80	TEX2	SM	0.123135	0.644367	6.01699	1.23853
80	TEX2	TAG	-0.572608	1.21117	3.8931	2.06556
81	C2CD2L	CE	0.556895	0.673378	3.01413	0.65325
81	C2CD2L	CER	0.853613	0.263615	0.46788	0.00982926
81	C2CD2L	DAG	-0.831138	1.27434	2.48592	0.88125
81	C2CD2L	DCER	0.030151	0.392901	0.0506825	0.00107289
81	C2CD2L	FFA	-0.0984833	0.693668	7.13314	2.50573
81	C2CD2L	HCER	-0.432049	0.404094	1.22104	0.0191004
81	C2CD2L	LCER	1.33276	0.649881	0.436243	0.00647561
81	C2CD2L	LPC	-0.853998	0.00783634	0.188388	0.0299851
81	C2CD2L	LPE	0.359563	0.887247	0.199009	0.0196857
81	C2CD2L	PA	0.0208073	0.616706	0.751019	0.47625
81	C2CD2L	PC	0.0801144	0.630735	37.2812	0.247374
81	C2CD2L	PE	0.301387	0.131324	22.0847	0.863861
81	C2CD2L	PG	-0.140015	0.0287656	0.844184	0.0344313
81	C2CD2L	PI	-0.645089	0.659731	9.39669	1.67389
81	C2CD2L	PS	0.0870508	0.688246	4.8019	0.894498
81	C2CD2L	SM	1.07202	0.625616	7.00643	0.250378
81	C2CD2L	TAG	-1.17606	0.160236	2.63746	0.625316
82	C2CD2	CE	-0.344121	0.430414	2.49433	0.363552
82	C2CD2	CER	0.0768517	0.335794	0.406734	0.00883595
82	C2CD2	DAG	0.241905	0.215875	2.79711	0.608357
82	C2CD2	DCER	-0.357777	NA	0.050121	NA
82	C2CD2	FFA	0.594847	0.340534	7.70683	1.63079
82	C2CD2	HCER	-0.260433	0.314533	1.26533	0.14539
82	C2CD2	LCER	0.941581	0.179147	0.408291	0.0649243
82	C2CD2	LPC	-0.468161	0.0635381	0.215471	0.0187197
82	C2CD2	LPE	0.731752	0.922827	0.232198	0.10757
82	C2CD2	PA	0.437662	1.00368	0.850872	0.598567
82	C2CD2	PC	-0.629298	0.628563	35.8057	2.48046
82	C2CD2	PE	0.263703	0.649914	21.9684	2.84959
82	C2CD2	PG	0.0527312	0.928996	0.861259	0.0672342
82	C2CD2	PI	-0.175451	1.00015	10.0495	0.137286
82	C2CD2	PS	0.263126	0.224225	4.88862	0.633056
82	C2CD2	SM	0.390526	0.255818	6.57915	0.443559
82	C2CD2	TAG	-0.585812	1.15244	3.44512	1.8844
83	GRAMD1A	CE	0.230628	1.02584	2.86383	0.792215
83	GRAMD1A	CER	0.777504	0.907645	0.464638	0.0601281
83	GRAMD1A	DAG	0.934616	0.23007	3.00534	0.508266
83	GRAMD1A	DCER	1.1802	0.527048	0.0637471	0.0131284
83	GRAMD1A	FFA	0.244175	0.109971	7.40774	1.99994
83	GRAMD1A	HCER	0.656395	0.0270342	1.46906	0.0829134
83	GRAMD1A	LCER	0.0305705	1.07594	0.344032	0.128943
83	GRAMD1A	LPC	0.963628	1.70945	0.327365	0.11792
83	GRAMD1A	LPE	1.11889	0.270173	0.238657	0.0611869
83	GRAMD1A	PA	-0.0250048	1.23867	0.78153	0.583467
83	GRAMD1A	PC	-1.13879	0.0313108	34.5379	0.816561
83	GRAMD1A	PE	-0.260258	0.151764	20.6591	0.84161
83	GRAMD1A	PG	0.459175	0.553736	0.906475	0.0236942
83	GRAMD1A	PI	0.17718	0.279702	10.2853	1.11527
83	GRAMD1A	PS	0.900463	2.29617	5.34426	1.908
83	GRAMD1A	SM	0.718103	0.352131	6.78724	0.403233
83	GRAMD1A	TAG	0.268743	2.09142	4.5138	3.19568
84	GRAMD1B	CE	0.233883	0.412679	2.81284	0.453276
84	GRAMD1B	CER	0.0224609	0.92939	0.404992	0.0553319
84	GRAMD1B	DAG	-0.512976	0.928846	2.51976	0.194778
84	GRAMD1B	DCER	0.125476	1.6527	0.0537859	0.0228279
84	GRAMD1B	FFA	-0.480112	0.414766	6.61092	1.29118
84	GRAMD1B	HCER	-0.184992	0.892151	1.27282	0.125094
84	GRAMD1B	LCER	-0.331194	0.692406	0.319115	0.102785
84	GRAMD1B	LPC	-0.241902	0.906336	0.237959	0.0428865
84	GRAMD1B	LPE	0.532735	0.24129	0.217064	0.0734047
84	GRAMD1B	PA	-0.154514	0.505764	0.712257	0.434214
84	GRAMD1B	PC	-0.0585381	0.971638	37.1733	3.42694
84	GRAMD1B	PE	0.22768	0.431431	21.8827	2.29672
84	GRAMD1B	PG	-0.567609	0.160571	0.797405	0.010752
84	GRAMD1B	PI	0.160242	0.860071	10.2094	1.71888
84	GRAMD1B	PS	-0.494239	0.405802	4.44705	0.683342
84	GRAMD1B	SM	0.271881	0.5611	6.49247	0.238751
84	GRAMD1B	TAG	-0.2014	1.13191	3.83625	2.01882
85	GRAMD1C	CE	0.719017	2.08889	3.30671	0.772334
85	GRAMD1C	CER	-0.0662825	1.11967	0.563703	0.181677
85	GRAMD1C	DAG	0.423416	0.453456	3.0709	0.298603
85	GRAMD1C	DCER	-0.436886	0.485813	0.0674875	0.0187601
85	GRAMD1C	FFA	-0.628293	0.58789	6.68558	1.45627
85	GRAMD1C	HCER	0.174516	0.672114	1.60604	0.367163
85	GRAMD1C	LCER	0.727424	1.53897	0.553552	0.148022
85	GRAMD1C	LPC	-0.905286	0.126732	0.15904	0.0178509
85	GRAMD1C	LPE	-0.85153	0.572277	0.136575	0.0218043
85	GRAMD1C	PA	1.56716	1.79044	0.617119	0.131512
85	GRAMD1C	PC	0.835666	1.07023	36.4418	3.13921
85	GRAMD1C	PE	-0.200449	1.1326	22.126	2.73933
85	GRAMD1C	PG	0.554306	1.25817	0.951837	0.0709702
85	GRAMD1C	PI	0.135265	0.314396	9.70442	1.1145
85	GRAMD1C	PS	0.777869	0.673463	5.09869	0.357806
85	GRAMD1C	SM	0.0136167	1.39283	6.07162	1.11751
85	GRAMD1C	TAG	-0.905441	0.545001	2.83887	0.300724
86	VPS13A	CE	1.31816	0.0300314	3.41329	0.448938
86	VPS13A	CER	0.487677	1.17541	0.462671	0.106826
86	VPS13A	DAG	1.67359	1.25972	3.44301	0.105072
86	VPS13A	DCER	0.0486788	0.331612	0.0592939	0.0135701
86	VPS13A	FFA	0.273718	1.1312	8.72069	4.67651
86	VPS13A	HCER	-1.20252	0.438381	1.08892	0.097783
86	VPS13A	LCER	0.829723	0.0992979	0.448758	0.127707
86	VPS13A	LPC	-0.0422947	0.514782	0.184064	0.0276202
86	VPS13A	LPE	-0.537225	0.171975	0.161186	0.0611147
86	VPS13A	PA	0.521825	2.04791	0.572203	0.290785
86	VPS13A	PC	0.844	1.07333	37.8673	2.65903
86	VPS13A	PE	-0.871084	0.312657	19.6693	1.24211
86	VPS13A	PG	1.43264	1.79623	0.958326	0.0818408
86	VPS13A	PI	-1.20094	0.80964	9.1486	0.0134482
86	VPS13A	PS	0.42756	1.13701	4.72049	0.761709
86	VPS13A	SM	0.0370248	1.02302	6.27237	1.41649
86	VPS13A	TAG	-1.12011	0.772674	2.80954	1.29093
87	VPS13B	CE	-0.630346	0.592308	2.37698	0.36981
87	VPS13B	CER	-0.250536	0.879951	0.432532	0.0705071
87	VPS13B	DAG	-0.258994	0.33003	2.73007	0.423235
87	VPS13B	DCER	-0.167565	1.0318	0.059653	0.0253334
87	VPS13B	FFA	-0.0535043	0.921596	6.68549	1.35568
87	VPS13B	HCER	-0.67073	0.538443	1.21788	0.0573435
87	VPS13B	LCER	-0.73991	0.371391	0.3518	0.129779
87	VPS13B	LPC	-0.00181952	1.26947	0.225888	0.109321
87	VPS13B	LPE	0.814659	0.726945	0.240585	0.0859924
87	VPS13B	PA	-0.713436	1.00187	0.429335	0.133184
87	VPS13B	PC	0.0928519	0.401139	35.458	0.671797
87	VPS13B	PE	0.574355	0.444991	23.4044	0.800947
87	VPS13B	PG	-0.548976	0.849048	0.839306	0.209852
87	VPS13B	PI	-0.0304083	0.757616	10.0659	0.439677
87	VPS13B	PS	0.140251	0.543668	4.81571	0.587086
87	VPS13B	SM	0.876457	0.520989	6.87815	0.569963
87	VPS13B	TAG	-0.233296	0.278493	3.78828	0.668531
88	VPS13C	CE	0.168197	0.882503	2.81692	0.702099
88	VPS13C	CER	-0.254322	0.850131	0.382751	0.046672
88	VPS13C	DAG	0.917889	0.104535	3.01033	0.614476
88	VPS13C	DCER	0.238644	0.168883	0.0534563	0.00742156
88	VPS13C	FFA	-0.281576	0.951502	6.74559	0.797402
88	VPS13C	HCER	-0.202028	0.245267	1.27408	0.0202763
88	VPS13C	LCER	-0.195568	0.69422	0.328572	0.102691
88	VPS13C	LPC	-0.97466	0.389009	0.183375	0.00472421
88	VPS13C	LPE	-0.772626	1.22272	0.167538	0.0935532
88	VPS13C	PA	-0.413322	0.538149	0.667284	0.407779
88	VPS13C	PC	0.354507	0.16161	37.9791	0.912175
88	VPS13C	PE	-0.0690899	0.238653	21.1342	1.82288
88	VPS13C	PG	-0.618968	0.481557	0.79064	0.0242121
88	VPS13C	PI	-0.542961	0.780591	9.64736	0.163795
88	VPS13C	PS	-0.227189	1.43025	4.64387	1.31009
88	VPS13C	SM	0.723272	0.669543	6.82457	1.06258
88	VPS13C	TAG	-0.406426	0.227797	3.35035	0.537713
89	VPS13D	CE	1.43053	1.3655	4.46428	2.46947
89	VPS13D	CER	0.829217	0.88211	0.596351	0.258291
89	VPS13D	DAG	0.218283	0.668267	2.88712	0.4597
89	VPS13D	DCER	1.37243	0.78782	0.086492	0.0309697
89	VPS13D	FFA	0.604594	1.05974	8.92682	3.23925
89	VPS13D	HCER	-0.426714	0.983266	1.28224	0.19887
89	VPS13D	LCER	0.181658	0.617325	0.459085	0.226325
89	VPS13D	LPC	0.357985	1.08576	0.178217	0.0155194
89	VPS13D	LPE	-0.0282698	0.651845	0.164282	0.0754128
89	VPS13D	PA	0.523218	0.919621	0.612322	0.0634476
89	VPS13D	PC	-0.014094	0.227551	34.9829	2.27085
89	VPS13D	PE	-0.917582	0.717164	19.5631	2.07858
89	VPS13D	PG	0.81795	0.714799	0.959553	0.0448382
89	VPS13D	PI	0.168344	0.333172	9.93613	0.705715
89	VPS13D	PS	0.676612	0.758577	4.94713	0.587579
89	VPS13D	SM	0.828691	0.830548	6.36335	1.36872
89	VPS13D	TAG	-0.445267	0.544343	3.5906	1.01587
90	COL4A3BP	CE	-0.436802	0.310074	2.47143	0.253347
90	COL4A3BP	CER	0.0782933	0.623095	0.438579	0.0594091
90	COL4A3BP	DAG	0.124646	1.10447	3.0147	0.88532
90	COL4A3BP	DCER	1.18744	1.31546	0.0706388	0.0182108
90	COL4A3BP	FFA	-0.0558744	0.278209	7.82721	1.91251
90	COL4A3BP	HCER	1.68088	0.40398	1.85673	0.193424
90	COL4A3BP	LCER	-0.409444	0.817022	0.406193	0.220341
90	COL4A3BP	LPC	-0.131818	0.440977	0.210376	0.0657279
90	COL4A3BP	LPE	-0.192351	0.398804	0.160935	0.0632451
90	COL4A3BP	PA	0.447228	0.561126	0.806049	0.409943
90	COL4A3BP	PC	0.0970987	1.03267	36.3201	2.67339
90	COL4A3BP	PE	0.225664	0.552709	22.4173	2.06137
90	COL4A3BP	PG	0.448372	0.216525	0.963059	0.115353
90	COL4A3BP	PI	-0.0722825	0.0867306	9.7989	0.82281
90	COL4A3BP	PS	-0.622505	0.441722	4.30958	0.544931
90	COL4A3BP	SM	-2.77042	1.21856	4.08414	0.752382
90	COL4A3BP	TAG	0.836713	1.18138	4.84406	1.73549
91	NonTarget_1	CE	-0.848983	0.597761	3.11307	1.95066
91	NonTarget_1	CER	-0.777292	0.459063	0.481354	0.251118
91	NonTarget_1	DAG	0.339461	1.88011	2.63037	1.06582
91	NonTarget_1	DCER	-0.014429	0.439602	0.0676567	0.0229247
91	NonTarget_1	FFA	0.529121	0.968587	7.32172	0.645557
91	NonTarget_1	HCER	-0.310783	0.272969	1.31785	0.0639416
91	NonTarget_1	LCER	-0.597047	0.871891	0.442751	0.368243
91	NonTarget_1	LPC	-0.166635	0.326623	0.243642	0.0920117
91	NonTarget_1	LPE	0.686544	1.2326	0.20241	0.117258
91	NonTarget_1	PA	-0.962393	0.181071	0.444758	0.0669648
91	NonTarget_1	PC	-1.4723	0.854084	32.592	1.76849
91	NonTarget_1	PE	1.32207	0.569561	24.4331	3.85088
91	NonTarget_1	PG	0.127923	0.288879	0.903906	0.114703
91	NonTarget_1	PI	-0.837897	0.931065	9.5988	1.18547
91	NonTarget_1	PS	-0.213027	0.667678	4.81031	0.35998
91	NonTarget_1	SM	-0.471641	0.875221	6.38662	1.3745
91	NonTarget_1	TAG	0.493255	1.65554	5.00975	2.26349
92	NonTarget_2	CE	0.0744216	1.00792	3.39364	1.88058
92	NonTarget_2	CER	-0.382794	0.381685	0.465385	0.17934
92	NonTarget_2	DAG	-0.168909	0.775623	2.58356	0.43627
92	NonTarget_2	DCER	-0.246571	0.569439	0.0599445	0.0167766
92	NonTarget_2	FFA	0.532355	1.22339	8.35872	2.19567
92	NonTarget_2	HCER	-0.518296	0.446791	1.22821	0.0897128
92	NonTarget_2	LCER	-0.199075	0.919949	0.50387	0.277863
92	NonTarget_2	LPC	-0.569041	0.33418	0.205136	0.0664386
92	NonTarget_2	LPE	-0.315207	1.0827	0.162811	0.0844163
92	NonTarget_2	PA	-0.279311	0.53542	0.591132	0.191955
92	NonTarget_2	PC	-0.337727	0.883957	34.8829	1.81673
92	NonTarget_2	PE	0.072721	0.808832	21.7773	2.71405
92	NonTarget_2	PG	-0.497452	0.664802	0.849343	0.12613
92	NonTarget_2	PI	-0.409538	0.754092	9.60265	0.418012
92	NonTarget_2	PS	-0.17243	1.13523	4.85171	0.648152
92	NonTarget_2	SM	0.221071	0.717271	6.44268	0.864021
92	NonTarget_2	TAG	0.156563	0.882467	4.04096	1.00394
93	NonTarget_3	CE	-0.0237111	0.759564	3.36188	1.76602
93	NonTarget_3	CER	-0.600873	0.252778	0.45805	0.182541
93	NonTarget_3	DAG	-0.316505	0.905173	2.5374	0.369387
93	NonTarget_3	DCER	-0.299708	0.484233	0.0577619	0.0220904
93	NonTarget_3	FFA	-0.0504759	0.918726	7.26782	1.84325
93	NonTarget_3	HCER	-0.611143	0.322922	1.2449	0.0935551
93	NonTarget_3	LCER	-0.349577	0.28953	0.458742	0.223297
93	NonTarget_3	LPC	-0.247125	0.954053	0.218991	0.0681146
93	NonTarget_3	LPE	-0.657212	0.763545	0.147436	0.0569683
93	NonTarget_3	PA	-0.246445	0.765515	0.577851	0.211154
93	NonTarget_3	PC	-0.00783917	0.688868	35.9842	1.99085
93	NonTarget_3	PE	0.146008	0.618632	21.5704	2.50647
93	NonTarget_3	PG	-0.351328	0.270522	0.870489	0.120011
93	NonTarget_3	PI	0.143593	0.657266	10.0254	0.624188
93	NonTarget_3	PS	-0.145548	0.465599	4.93328	0.489587
93	NonTarget_3	SM	0.0494376	0.442576	6.55789	0.971925
93	NonTarget_3	TAG	0.00912504	0.861288	3.72754	0.877402
94	NonTarget_4	CE	-0.382882	0.187195	3.03403	1.12678
94	NonTarget_4	CER	-0.679272	0.166011	0.428092	0.170353
94	NonTarget_4	DAG	0.190221	0.3514	2.67924	0.393802
94	NonTarget_4	DCER	-0.605402	0.604704	0.0537313	0.0100253
94	NonTarget_4	FFA	-0.303354	0.859535	7.35258	2.73204
94	NonTarget_4	HCER	-0.523494	0.328324	1.23392	0.153635
94	NonTarget_4	LCER	-0.395367	0.110329	0.447866	0.21029
94	NonTarget_4	LPC	-0.742529	0.388352	0.204849	0.0927887
94	NonTarget_4	LPE	-0.45333	0.85461	0.135742	0.0471226
94	NonTarget_4	PA	0.237277	0.496682	0.671204	0.206909
94	NonTarget_4	PC	0.101611	0.526141	36.0679	1.40683
94	NonTarget_4	PE	0.347222	0.772547	21.8348	1.27262
94	NonTarget_4	PG	-0.355889	0.714824	0.869511	0.17841
94	NonTarget_4	PI	0.442155	1.08946	10.1068	0.748104
94	NonTarget_4	PS	-0.0906345	0.666921	4.85774	0.480462
94	NonTarget_4	SM	0.277867	0.840229	6.44735	1.08233
94	NonTarget_4	TAG	-0.254235	0.518908	3.5746	0.785099
95	NonTarget_5	CE	-0.660779	0.666618	2.78408	0.637021
95	NonTarget_5	CER	-0.855772	0.664174	0.403054	0.0800601
95	NonTarget_5	DAG	0.622348	1.24257	2.79593	0.452948
95	NonTarget_5	DCER	-0.726923	0.981213	0.0554826	0.00991896
95	NonTarget_5	FFA	-0.702268	0.329984	6.49335	1.7377
95	NonTarget_5	HCER	-0.428451	0.337514	1.25452	0.153307
95	NonTarget_5	LCER	-0.944314	0.719545	0.410871	0.137216
95	NonTarget_5	LPC	-0.592321	0.794626	0.202796	0.0739987
95	NonTarget_5	LPE	0.0264099	0.943465	0.167764	0.0546319
95	NonTarget_5	PA	0.843558	1.13749	0.717447	0.261613
95	NonTarget_5	PC	-0.297998	1.33008	34.5608	1.65162
95	NonTarget_5	PE	0.752252	0.777923	23.0631	1.94456
95	NonTarget_5	PG	-0.0107726	1.14725	0.918372	0.221854
95	NonTarget_5	PI	1.20276	1.20783	10.8852	1.28727
95	NonTarget_5	PS	-0.42857	0.405719	4.68525	0.45636
95	NonTarget_5	SM	-0.423689	0.745177	6.01567	0.408001
95	NonTarget_5	TAG	0.490184	1.23141	4.59555	1.17973
96	NonTarget_6	CE	-0.586738	0.252309	2.41925	0.255765
96	NonTarget_6	CER	-1.04248	0.291996	0.349394	0.0444592
96	NonTarget_6	DAG	0.512274	1.45959	3.04085	0.659698
96	NonTarget_6	DCER	-0.573249	0.245453	0.0500039	0.0113707
96	NonTarget_6	FFA	-0.709295	0.332236	6.06785	1.77816
96	NonTarget_6	HCER	-1.01574	0.114813	1.17335	0.0844789
96	NonTarget_6	LCER	-0.551532	0.491905	0.344829	0.0591581
96	NonTarget_6	LPC	-0.0934677	0.903041	0.186445	0.0430866
96	NonTarget_6	LPE	0.828246	0.965233	0.241044	0.0899347
96	NonTarget_6	PA	0.498817	0.835202	0.544608	0.111299
96	NonTarget_6	PC	0.363202	1.15563	35.8284	0.767878
96	NonTarget_6	PE	0.891313	0.472447	24.2302	1.10901
96	NonTarget_6	PG	0.662808	1.35671	0.974436	0.197834
96	NonTarget_6	PI	-0.573082	0.525803	9.71241	0.553531
96	NonTarget_6	PS	-0.863208	0.752337	4.20655	0.353876
96	NonTarget_6	SM	-0.792445	1.4763	5.6518	0.480124
96	NonTarget_6	TAG	0.443425	0.162494	4.97852	0.278258

## Sheet: Lipid Classes Percentages
SampleRoster	SampleID	LipidClass	Percentage	Lipidomics.Round	Target Gene Symbol	ColumnNo	RowNo	Zscore	Control
48	B09	LPE	0.0957494	Sept	OSBPL8	9	A	-0.726853	FALSE
48	B09	CER	0.920269	Sept	OSBPL8	9	A	1.78706	FALSE
48	B09	PI	9.63048	Sept	OSBPL8	9	A	0.498407	FALSE
48	B09	DAG	3.81393	Sept	OSBPL8	9	A	1.1073	FALSE
48	B09	SM	4.68255	Sept	OSBPL8	9	A	-0.653729	FALSE
48	B09	PG	1.01002	Sept	OSBPL8	9	A	0.182575	FALSE
48	B09	PS	5.46321	Sept	OSBPL8	9	A	1.30169	FALSE
48	B09	PE	17.7047	Sept	OSBPL8	9	A	-1.49405	FALSE
48	B09	DCER	0.100645	Sept	OSBPL8	9	A	1.60154	FALSE
48	B09	PA	0.70558	Sept	OSBPL8	9	A	0.219229	FALSE
48	B09	PC	32.2682	Sept	OSBPL8	9	A	-0.26965	FALSE
48	B09	LCER	0.99456	Sept	OSBPL8	9	A	2.44941	FALSE
48	B09	LPC	0.167317	Sept	OSBPL8	9	A	0.657373	FALSE
48	B09	FFA	12.2674	Sept	OSBPL8	9	A	1.53942	FALSE
48	B09	CE	5.64877	Sept	OSBPL8	9	A	1.8105	FALSE
48	B09	TAG	2.64942	Sept	OSBPL8	9	A	-0.924875	FALSE
48	B09	HCER	1.87717	Sept	OSBPL8	9	A	0.901091	FALSE
49	B10	CER	1.1527	Sept	OSBPL9	10	A	2.74913	FALSE
49	B10	DCER	0.103461	Sept	OSBPL9	10	A	1.72524	FALSE
49	B10	LPE	0.0928293	Sept	OSBPL9	10	A	-0.787412	FALSE
49	B10	PS	4.47953	Sept	OSBPL9	10	A	-0.147381	FALSE
49	B10	PA	0.829902	Sept	OSBPL9	10	A	1.16211	FALSE
49	B10	PG	1.161	Sept	OSBPL9	10	A	0.976223	FALSE
49	B10	LCER	0.937973	Sept	OSBPL9	10	A	2.12911	FALSE
49	B10	PI	8.5626	Sept	OSBPL9	10	A	-1.1208	FALSE
49	B10	HCER	3.35572	Sept	OSBPL9	10	A	3.42027	FALSE
49	B10	FFA	9.62224	Sept	OSBPL9	10	A	0.120272	FALSE
49	B10	CE	5.10047	Sept	OSBPL9	10	A	1.41517	FALSE
49	B10	PC	34.5675	Sept	OSBPL9	10	A	0.506254	FALSE
49	B10	DAG	3.96193	Sept	OSBPL9	10	A	1.32494	FALSE
49	B10	PE	19.6629	Sept	OSBPL9	10	A	-0.945779	FALSE
49	B10	TAG	2.36686	Sept	OSBPL9	10	A	-1.04898	FALSE
49	B10	SM	3.90632	Sept	OSBPL9	10	A	-1.53598	FALSE
49	B10	LPC	0.136044	Sept	OSBPL9	10	A	-1.03918	FALSE
19	B19	TAG	1.99385	May	STARD7	7	B	-1.21281	FALSE
19	B19	PC	34.2724	May	STARD7	7	B	0.406659	FALSE
19	B19	LPC	0.15338	May	STARD7	7	B	-0.098701	FALSE
19	B19	SM	6.35337	May	STARD7	7	B	1.24528	FALSE
19	B19	PS	6.13668	May	STARD7	7	B	2.2938	FALSE
19	B19	PG	1.62574	May	STARD7	7	B	3.41935	FALSE
19	B19	CE	2.73273	May	STARD7	7	B	-0.292032	FALSE
19	B19	FFA	7.032	May	STARD7	7	B	-1.26938	FALSE
19	B19	LCER	0.583792	May	STARD7	7	B	0.124375	FALSE
19	B19	CER	0.556824	May	STARD7	7	B	0.282715	FALSE
19	B19	PA	0.927007	May	STARD7	7	B	1.89857	FALSE
19	B19	DCER	0.0441017	May	STARD7	7	B	-0.882325	FALSE
19	B19	HCER	1.37056	May	STARD7	7	B	0.0379147	FALSE
19	B19	PI	9.78755	May	STARD7	7	B	0.736567	FALSE
19	B19	LPE	0.14541	May	STARD7	7	B	0.303012	FALSE
19	B19	DAG	2.93466	May	STARD7	7	B	-0.185714	FALSE
19	B19	PE	23.35	May	STARD7	7	B	0.0865347	FALSE
20	B20	PS	5.03109	May	STARD8	8	B	0.66514	FALSE
20	B20	FFA	9.25184	May	STARD8	8	B	-0.0784443	FALSE
20	B20	PC	34.2112	May	STARD8	8	B	0.386006	FALSE
20	B20	CE	2.82731	May	STARD8	8	B	-0.223835	FALSE
20	B20	LPC	0.173181	May	STARD8	8	B	0.975538	FALSE
20	B20	PA	0.815241	May	STARD8	8	B	1.05092	FALSE
20	B20	CER	0.362108	May	STARD8	8	B	-0.523236	FALSE
20	B20	TAG	5.49861	May	STARD8	8	B	0.326524	FALSE
20	B20	PG	0.983301	May	STARD8	8	B	0.0420952	FALSE
20	B20	PI	9.95392	May	STARD8	8	B	0.988836	FALSE
20	B20	LCER	0.552558	May	STARD8	8	B	-0.0524185	FALSE
20	B20	DCER	0.0393504	May	STARD8	8	B	-1.09104	FALSE
20	B20	HCER	1.04595	May	STARD8	8	B	-0.515154	FALSE
20	B20	LPE	0.114498	May	STARD8	8	B	-0.338049	FALSE
20	B20	SM	6.68186	May	STARD8	8	B	1.61863	FALSE
20	B20	PE	20.2306	May	STARD8	8	B	-0.786824	FALSE
20	B20	DAG	2.22735	May	STARD8	8	B	-1.22585	FALSE
22	B21	CE	2.732	May	STARD9	9	B	-0.292559	FALSE
22	B21	PS	4.22848	May	STARD9	9	B	-0.517206	FALSE
22	B21	LPC	0.152415	May	STARD9	9	B	-0.151072	FALSE
22	B21	PC	36.8603	May	STARD9	9	B	1.27995	FALSE
22	B21	PA	0.728613	May	STARD9	9	B	0.393914	FALSE
22	B21	FFA	10.995	May	STARD9	9	B	0.856769	FALSE
22	B21	DCER	0.0665889	May	STARD9	9	B	0.105497	FALSE
22	B21	LCER	0.469607	May	STARD9	9	B	-0.521938	FALSE
22	B21	LPE	0.113097	May	STARD9	9	B	-0.367101	FALSE
22	B21	TAG	4.33925	May	STARD9	9	B	-0.182682	FALSE
22	B21	SM	4.69028	May	STARD9	9	B	-0.644951	FALSE
22	B21	PG	0.976773	May	STARD9	9	B	0.00777706	FALSE
22	B21	PI	8.18027	May	STARD9	9	B	-1.70052	FALSE
22	B21	DAG	2.83256	May	STARD9	9	B	-0.335851	FALSE
22	B21	PE	21.2047	May	STARD9	9	B	-0.514099	FALSE
22	B21	HCER	1.07511	May	STARD9	9	B	-0.465473	FALSE
22	B21	CER	0.354929	May	STARD9	9	B	-0.552954	FALSE
23	B22	LCER	0.362944	May	STARD10	10	B	-1.12567	FALSE
23	B22	CE	2.08634	May	STARD10	10	B	-0.758092	FALSE
23	B22	PC	31.0124	May	STARD10	10	B	-0.693406	FALSE
23	B22	PS	3.94187	May	STARD10	10	B	-0.939413	FALSE
23	B22	DCER	0.0537177	May	STARD10	10	B	-0.459909	FALSE
23	B22	PA	0.61376	May	STARD10	10	B	-0.477158	FALSE
23	B22	FFA	12.0663	May	STARD10	10	B	1.43151	FALSE
23	B22	LPE	0.163449	May	STARD10	10	B	0.67711	FALSE
23	B22	PI	9.01823	May	STARD10	10	B	-0.429938	FALSE
23	B22	HCER	0.932665	May	STARD10	10	B	-0.708171	FALSE
23	B22	LPC	0.17721	May	STARD10	10	B	1.19408	FALSE
23	B22	SM	4.78563	May	STARD10	10	B	-0.536569	FALSE
23	B22	TAG	6.27058	May	STARD10	10	B	0.665579	FALSE
23	B22	PE	24.5247	May	STARD10	10	B	0.41545	FALSE
23	B22	PG	0.936377	May	STARD10	10	B	-0.204582	FALSE
23	B22	DAG	2.76395	May	STARD10	10	B	-0.436742	FALSE
23	B22	CER	0.289777	May	STARD10	10	B	-0.822624	FALSE
24	B23	CE	2.34877	May	DLC1	11	B	-0.568879	FALSE
24	B23	PC	34.5946	May	DLC1	11	B	0.515377	FALSE
24	B23	PI	9.51244	May	DLC1	11	B	0.319419	FALSE
24	B23	LPC	0.127957	May	DLC1	11	B	-1.47793	FALSE
24	B23	LCER	0.547286	May	DLC1	11	B	-0.0822566	FALSE
24	B23	PS	4.6128	May	DLC1	11	B	0.0489509	FALSE
24	B23	PA	0.539908	May	DLC1	11	B	-1.03726	FALSE
24	B23	SM	6.06771	May	DLC1	11	B	0.920606	FALSE
24	B23	FFA	8.02024	May	DLC1	11	B	-0.739194	FALSE
24	B23	LPE	0.106719	May	DLC1	11	B	-0.499364	FALSE
24	B23	DAG	2.47483	May	DLC1	11	B	-0.861913	FALSE
24	B23	TAG	4.81489	May	DLC1	11	B	0.026225	FALSE
24	B23	DCER	0.0591746	May	DLC1	11	B	-0.220199	FALSE
24	B23	PG	0.892724	May	DLC1	11	B	-0.434066	FALSE
24	B23	HCER	1.10946	May	DLC1	11	B	-0.406953	FALSE
24	B23	PE	23.7624	May	DLC1	11	B	0.201995	FALSE
24	B23	CER	0.408181	May	DLC1	11	B	-0.332537	FALSE
37	B35	FFA	10.6836	May	PITPNC1	11	C	0.68969	FALSE
37	B35	PC	33.3711	May	PITPNC1	11	C	0.102525	FALSE
37	B35	PS	4.13171	May	PITPNC1	11	C	-0.659754	FALSE
37	B35	DCER	0.051613	May	PITPNC1	11	C	-0.552365	FALSE
37	B35	HCER	0.877052	May	PITPNC1	11	C	-0.802927	FALSE
37	B35	SM	5.3801	May	PITPNC1	11	C	0.139085	FALSE
37	B35	CE	2.1801	May	PITPNC1	11	C	-0.69049	FALSE
37	B35	CER	0.299293	May	PITPNC1	11	C	-0.783238	FALSE
37	B35	LPE	0.124049	May	PITPNC1	11	C	-0.139968	FALSE
37	B35	DAG	3.06206	May	PITPNC1	11	C	0.00164192	FALSE
37	B35	PE	21.4633	May	PITPNC1	11	C	-0.441708	FALSE
37	B35	PI	9.78806	May	PITPNC1	11	C	0.737342	FALSE
37	B35	PG	0.800547	May	PITPNC1	11	C	-0.918633	FALSE
37	B35	LPC	0.140461	May	PITPNC1	11	C	-0.799554	FALSE
37	B35	PA	0.72517	May	PITPNC1	11	C	0.367798	FALSE
37	B35	LCER	0.405372	May	PITPNC1	11	C	-0.885518	FALSE
37	B35	TAG	6.51643	May	PITPNC1	11	C	0.773558	FALSE
51	B45	PS	4.97829	Sept	GLTPD2	9	D	0.587357	FALSE
51	B45	FFA	7.35313	Sept	GLTPD2	9	D	-1.0971	FALSE
51	B45	LPE	0.124324	Sept	GLTPD2	9	D	-0.134279	FALSE
51	B45	DCER	0.0880406	Sept	GLTPD2	9	D	1.04783	FALSE
51	B45	LCER	0.709879	Sept	GLTPD2	9	D	0.838052	FALSE
51	B45	PI	9.42562	Sept	GLTPD2	9	D	0.18778	FALSE
51	B45	PE	21.2727	Sept	GLTPD2	9	D	-0.495062	FALSE
51	B45	PA	0.682929	Sept	GLTPD2	9	D	0.0474364	FALSE
51	B45	CE	2.88313	Sept	GLTPD2	9	D	-0.183589	FALSE
51	B45	DAG	4.31772	Sept	GLTPD2	9	D	1.84815	FALSE
51	B45	HCER	1.56351	Sept	GLTPD2	9	D	0.36668	FALSE
51	B45	TAG	2.62705	Sept	GLTPD2	9	D	-0.934699	FALSE
51	B45	PC	36.6069	Sept	GLTPD2	9	D	1.19444	FALSE
51	B45	LPC	0.186216	Sept	GLTPD2	9	D	1.68266	FALSE
51	B45	SM	5.53988	Sept	GLTPD2	9	D	0.320686	FALSE
51	B45	PG	1.04989	Sept	GLTPD2	9	D	0.392156	FALSE
51	B45	CER	0.59079	Sept	GLTPD2	9	D	0.423304	FALSE
53	B48	LPE	0.0884295	Sept	SEC14L1	12	D	-0.878655	FALSE
53	B48	FFA	7.41811	Sept	SEC14L1	12	D	-1.06223	FALSE
53	B48	LPC	0.153098	Sept	SEC14L1	12	D	-0.114021	FALSE
53	B48	PS	4.94298	Sept	SEC14L1	12	D	0.535339	FALSE
53	B48	SM	6.48367	Sept	SEC14L1	12	D	1.39336	FALSE
53	B48	PC	34.0173	Sept	SEC14L1	12	D	0.320593	FALSE
53	B48	PA	0.56472	Sept	SEC14L1	12	D	-0.849086	FALSE
53	B48	LCER	0.485109	Sept	SEC14L1	12	D	-0.434192	FALSE
53	B48	HCER	1.53799	Sept	SEC14L1	12	D	0.3232	FALSE
53	B48	PI	9.1556	Sept	SEC14L1	12	D	-0.221642	FALSE
53	B48	DAG	3.55912	Sept	SEC14L1	12	D	0.732588	FALSE
53	B48	PE	24.3714	Sept	SEC14L1	12	D	0.372516	FALSE
53	B48	DCER	0.0716187	Sept	SEC14L1	12	D	0.326448	FALSE
53	B48	CER	0.466849	Sept	SEC14L1	12	D	-0.0897008	FALSE
53	B48	CE	2.24952	Sept	SEC14L1	12	D	-0.640435	FALSE
53	B48	TAG	3.66719	Sept	SEC14L1	12	D	-0.477857	FALSE
53	B48	PG	0.767257	Sept	SEC14L1	12	D	-1.09363	FALSE
60	B57	PI	8.83692	May	TTPA	9	E	-0.704857	FALSE
60	B57	PC	30.086	May	TTPA	9	E	-1.00602	FALSE
60	B57	PS	4.23898	May	TTPA	9	E	-0.501726	FALSE
60	B57	DAG	2.71913	May	TTPA	9	E	-0.502659	FALSE
60	B57	DCER	0.0660494	May	TTPA	9	E	0.0817989	FALSE
60	B57	PG	0.790021	May	TTPA	9	E	-0.973965	FALSE
60	B57	LPC	0.126596	May	TTPA	9	E	-1.55173	FALSE
60	B57	HCER	1.06162	May	TTPA	9	E	-0.488447	FALSE
60	B57	FFA	11.4757	May	TTPA	9	E	1.11463	FALSE
60	B57	LPE	0.131424	May	TTPA	9	E	0.0129579	FALSE
60	B57	SM	5.07252	May	TTPA	9	E	-0.210499	FALSE
60	B57	PE	25.3786	May	TTPA	9	E	0.654502	FALSE
60	B57	CE	2.2891	May	TTPA	9	E	-0.611902	FALSE
60	B57	LCER	0.405016	May	TTPA	9	E	-0.887533	FALSE
60	B57	PA	0.693838	May	TTPA	9	E	0.130173	FALSE
60	B57	TAG	6.3303	May	TTPA	9	E	0.691808	FALSE
60	B57	CER	0.298217	May	TTPA	9	E	-0.787692	FALSE
71	B67	LPC	0.16434	May	GDAP2	7	F	0.495912	FALSE
71	B67	CE	3.09512	May	GDAP2	7	F	-0.0307392	FALSE
71	B67	DAG	2.41866	May	GDAP2	7	F	-0.94452	FALSE
71	B67	SM	4.9723	May	GDAP2	7	F	-0.32441	FALSE
71	B67	LPE	0.242917	May	GDAP2	7	F	2.32512	FALSE
71	B67	PA	0.522157	May	GDAP2	7	F	-1.17189	FALSE
71	B67	PI	10.3067	May	GDAP2	7	F	1.5238	FALSE
71	B67	DCER	0.0422412	May	GDAP2	7	F	-0.964053	FALSE
71	B67	PC	28.5233	May	GDAP2	7	F	-1.53336	FALSE
71	B67	HCER	1.09362	May	GDAP2	7	F	-0.433932	FALSE
71	B67	PS	4.07189	May	GDAP2	7	F	-0.74787	FALSE
71	B67	PE	27.5474	May	GDAP2	7	F	1.26175	FALSE
71	B67	TAG	8.37048	May	GDAP2	7	F	1.58788	FALSE
71	B67	FFA	6.90359	May	GDAP2	7	F	-1.33827	FALSE
71	B67	PG	0.907599	May	GDAP2	7	F	-0.355869	FALSE
71	B67	CER	0.376114	May	GDAP2	7	F	-0.465266	FALSE
71	B67	LCER	0.441473	May	GDAP2	7	F	-0.681178	FALSE
73	B68	PG	0.933956	May	SESTD1	8	F	-0.217308	FALSE
73	B68	PI	8.04574	May	SESTD1	8	F	-1.90452	FALSE
73	B68	CER	0.346485	May	SESTD1	8	F	-0.587902	FALSE
73	B68	PC	25.3241	May	SESTD1	8	F	-2.61293	FALSE
73	B68	LPC	0.176487	May	SESTD1	8	F	1.15487	FALSE
73	B68	HCER	0.797249	May	SESTD1	8	F	-0.938895	FALSE
73	B68	DAG	1.98942	May	SESTD1	8	F	-1.57574	FALSE
73	B68	CE	3.70725	May	SESTD1	8	F	0.410616	FALSE
73	B68	SM	3.89279	May	SESTD1	8	F	-1.55136	FALSE
73	B68	PE	32.5513	May	SESTD1	8	F	2.66276	FALSE
73	B68	LPE	0.261937	May	SESTD1	8	F	2.71954	FALSE
73	B68	PS	3.37337	May	SESTD1	8	F	-1.77688	FALSE
73	B68	DCER	0.0356136	May	SESTD1	8	F	-1.25519	FALSE
73	B68	FFA	7.17915	May	SESTD1	8	F	-1.19044	FALSE
73	B68	PA	0.341438	May	SESTD1	8	F	-2.5425	FALSE
73	B68	TAG	10.7029	May	SESTD1	8	F	2.61232	FALSE
73	B68	LCER	0.340747	May	SESTD1	8	F	-1.25131	FALSE
56	B80	CE	2.49292	Sept	TEX2	8	G	-0.464944	FALSE
56	B80	LPC	0.146869	Sept	TEX2	8	G	-0.451947	FALSE
56	B80	TAG	5.86893	Sept	TEX2	8	G	0.48917	FALSE
56	B80	HCER	1.21141	Sept	TEX2	8	G	-0.233241	FALSE
56	B80	PE	27.2962	Sept	TEX2	8	G	1.1914	FALSE
56	B80	PC	30.0455	Sept	TEX2	8	G	-1.01969	FALSE
56	B80	LPE	0.114731	Sept	TEX2	8	G	-0.33321	FALSE
56	B80	PG	0.955597	Sept	TEX2	8	G	-0.103546	FALSE
56	B80	PI	8.54106	Sept	TEX2	8	G	-1.15347	FALSE
56	B80	DAG	4.24532	Sept	TEX2	8	G	1.74168	FALSE
56	B80	CER	0.401219	Sept	TEX2	8	G	-0.361352	FALSE
56	B80	SM	4.74707	Sept	TEX2	8	G	-0.580402	FALSE
56	B80	DCER	0.0677267	Sept	TEX2	8	G	0.15548	FALSE
56	B80	PA	0.829937	Sept	TEX2	8	G	1.16238	FALSE
56	B80	FFA	8.64	Sept	TEX2	8	G	-0.406698	FALSE
56	B80	LCER	0.548352	Sept	TEX2	8	G	-0.0762223	FALSE
56	B80	PS	3.84718	Sept	TEX2	8	G	-1.0789	FALSE
95	B89	PA	0.605661	May	VPS13D	5	H	-0.538577	FALSE
95	B89	SM	5.25081	May	VPS13D	5	H	-0.00786359	FALSE
95	B89	PS	5.38625	May	VPS13D	5	H	1.18832	FALSE
95	B89	PE	17.5188	May	VPS13D	5	H	-1.54608	FALSE
95	B89	HCER	1.34466	May	VPS13D	5	H	-0.00621157	FALSE
95	B89	DAG	2.74536	May	VPS13D	5	H	-0.464086	FALSE
95	B89	LPE	0.0934305	May	VPS13D	5	H	-0.774944	FALSE
95	B89	LCER	0.718146	May	VPS13D	5	H	0.884847	FALSE
95	B89	FFA	12.5508	May	VPS13D	5	H	1.69143	FALSE
95	B89	PI	9.3025	May	VPS13D	5	H	0.00109642	FALSE
95	B89	LPC	0.183781	May	VPS13D	5	H	1.55059	FALSE
95	B89	CE	7.29017	May	VPS13D	5	H	2.99399	FALSE
95	B89	CER	0.892599	May	VPS13D	5	H	1.67253	FALSE
95	B89	DCER	0.111697	May	VPS13D	5	H	2.087	FALSE
95	B89	PG	0.991275	May	VPS13D	5	H	0.0840113	FALSE
95	B89	PC	32.3608	May	VPS13D	5	H	-0.238405	FALSE
95	B89	TAG	2.65324	May	VPS13D	5	H	-0.923197	FALSE
59	B90	PG	1.09583	Sept	COL4A3BP	6	H	0.63367	FALSE
59	B90	LPC	0.148562	Sept	COL4A3BP	6	H	-0.360074	FALSE
59	B90	SM	3.8214	Sept	COL4A3BP	6	H	-1.63249	FALSE
59	B90	TAG	3.65484	Sept	COL4A3BP	6	H	-0.483281	FALSE
59	B90	LCER	0.655938	Sept	COL4A3BP	6	H	0.532737	FALSE
59	B90	CER	0.492455	Sept	COL4A3BP	6	H	0.0162866	FALSE
59	B90	DAG	3.75939	Sept	COL4A3BP	6	H	1.0271	FALSE
59	B90	PI	9.1895	Sept	COL4A3BP	6	H	-0.170246	FALSE
59	B90	FFA	9.10608	Sept	COL4A3BP	6	H	-0.156646	FALSE
59	B90	PE	22.6795	Sept	COL4A3BP	6	H	-0.101171	FALSE
59	B90	LPE	0.099711	Sept	COL4A3BP	6	H	-0.644698	FALSE
59	B90	PS	4.28474	Sept	COL4A3BP	6	H	-0.434316	FALSE
59	B90	PA	0.695508	Sept	COL4A3BP	6	H	0.142837	FALSE
59	B90	CE	2.52352	Sept	COL4A3BP	6	H	-0.442881	FALSE
59	B90	PC	35.6468	Sept	COL4A3BP	6	H	0.870446	FALSE
59	B90	HCER	2.07209	Sept	COL4A3BP	6	H	1.23321	FALSE
59	B90	DCER	0.0741149	Sept	COL4A3BP	6	H	0.436105	FALSE
100	B92	SM	5.57647	May	NonTarget_2	8	H	0.362266	TRUE
100	B92	LCER	0.527001	May	NonTarget_2	8	H	-0.197077	TRUE
100	B92	FFA	9.39404	May	NonTarget_2	8	H	-0.00215666	TRUE
100	B92	PS	4.43988	May	NonTarget_2	8	H	-0.205786	TRUE
100	B92	DAG	2.83613	May	NonTarget_2	8	H	-0.330608	TRUE
100	B92	PG	0.820464	May	NonTarget_2	8	H	-0.813929	TRUE
100	B92	PC	33.6265	May	NonTarget_2	8	H	0.188702	TRUE
100	B92	HCER	1.11519	May	NonTarget_2	8	H	-0.397182	TRUE
100	B92	PE	23.4302	May	NonTarget_2	8	H	0.108999	TRUE
100	B92	DCER	0.0524943	May	NonTarget_2	8	H	-0.513654	TRUE
100	B92	CER	0.344935	May	NonTarget_2	8	H	-0.594318	TRUE
100	B92	PA	0.702092	May	NonTarget_2	8	H	0.19277	TRUE
100	B92	CE	2.23256	May	NonTarget_2	8	H	-0.652666	TRUE
100	B92	TAG	5.40112	May	NonTarget_2	8	H	0.283702	TRUE
100	B92	PI	9.22561	May	NonTarget_2	8	H	-0.115494	TRUE
100	B92	LPE	0.133935	May	NonTarget_2	8	H	0.0650476	TRUE
100	B92	LPC	0.141401	May	NonTarget_2	8	H	-0.748581	TRUE
105	B94	SM	6.35337	May	NonTarget_4	10	H	1.24528	TRUE
105	B94	HCER	1.14971	May	NonTarget_4	10	H	-0.338359	TRUE
105	B94	PS	5.30128	May	NonTarget_4	10	H	1.06315	TRUE
105	B94	CE	2.77191	May	NonTarget_4	10	H	-0.263782	TRUE
105	B94	CER	0.377978	May	NonTarget_4	10	H	-0.457549	TRUE
105	B94	DAG	2.81406	May	NonTarget_4	10	H	-0.363058	TRUE
105	B94	LCER	0.50529	May	NonTarget_4	10	H	-0.319963	TRUE
105	B94	FFA	10.0863	May	NonTarget_4	10	H	0.369265	TRUE
105	B94	PC	34.898	May	NonTarget_4	10	H	0.61776	TRUE
105	B94	DCER	0.0425129	May	NonTarget_4	10	H	-0.952118	TRUE
105	B94	PI	9.95271	May	NonTarget_4	10	H	0.986997	TRUE
105	B94	PE	21.3586	May	NonTarget_4	10	H	-0.471023	TRUE
105	B94	PG	1.01102	May	NonTarget_4	10	H	0.18782	TRUE
105	B94	PA	0.657181	May	NonTarget_4	10	H	-0.147841	TRUE
105	B94	TAG	2.49817	May	NonTarget_4	10	H	-0.991305	TRUE
105	B94	LPC	0.135814	May	NonTarget_4	10	H	-1.05169	TRUE
105	B94	LPE	0.0861169	May	NonTarget_4	10	H	-0.926614	TRUE
108	B95	PI	10.3182	May	NonTarget_5	11	H	1.54123	TRUE
108	B95	PS	4.12169	May	NonTarget_5	11	H	-0.674518	TRUE
108	B95	FFA	8.51749	May	NonTarget_5	11	H	-0.472423	TRUE
108	B95	DCER	0.0487966	May	NonTarget_5	11	H	-0.676086	TRUE
108	B95	TAG	4.12431	May	NonTarget_5	11	H	-0.277088	TRUE
108	B95	SM	5.63875	May	NonTarget_5	11	H	0.433057	TRUE
108	B95	LCER	0.483508	May	NonTarget_5	11	H	-0.443253	TRUE
108	B95	PG	0.821184	May	NonTarget_5	11	H	-0.810147	TRUE
108	B95	DAG	2.68241	May	NonTarget_5	11	H	-0.556661	TRUE
108	B95	HCER	1.02701	May	NonTarget_5	11	H	-0.547421	TRUE
108	B95	LPE	0.152419	May	NonTarget_5	11	H	0.448363	TRUE
108	B95	PE	22.469	May	NonTarget_5	11	H	-0.160109	TRUE
108	B95	PC	35.9855	May	NonTarget_5	11	H	0.984759	TRUE
108	B95	CER	0.350168	May	NonTarget_5	11	H	-0.572657	TRUE
108	B95	PA	0.676171	May	NonTarget_5	11	H	-0.00381687	TRUE
108	B95	LPC	0.157659	May	NonTarget_5	11	H	0.133454	TRUE
108	B95	CE	2.42564	May	NonTarget_5	11	H	-0.513448	TRUE
2	C02	CE	3.03019	May	OSBPL1A	2	A	0.372964	FALSE
2	C02	LPE	0.114699	May	OSBPL1A	2	A	-1.21982	FALSE
2	C02	LCER	0.37141	May	OSBPL1A	2	A	-0.138812	FALSE
2	C02	PE	20.4142	May	OSBPL1A	2	A	-0.0169997	FALSE
2	C02	PC	40.0734	May	OSBPL1A	2	A	0.818964	FALSE
2	C02	PA	1.1342	May	OSBPL1A	2	A	0.628887	FALSE
2	C02	PI	8.33882	May	OSBPL1A	2	A	-1.00471	FALSE
2	C02	TAG	2.69804	May	OSBPL1A	2	A	-0.61196	FALSE
2	C02	SM	6.01241	May	OSBPL1A	2	A	0.14815	FALSE
2	C02	PG	0.770582	May	OSBPL1A	2	A	-0.642025	FALSE
2	C02	CER	0.386293	May	OSBPL1A	2	A	0.00112707	FALSE
2	C02	DAG	2.70522	May	OSBPL1A	2	A	1.31146	FALSE
2	C02	DCER	0.0442267	May	OSBPL1A	2	A	-0.849366	FALSE
2	C02	FFA	7.60893	May	OSBPL1A	2	A	-0.701655	FALSE
2	C02	HCER	1.39261	May	OSBPL1A	2	A	0.592256	FALSE
2	C02	LPC	0.199472	May	OSBPL1A	2	A	-1.02596	FALSE
2	C02	PS	4.70522	May	OSBPL1A	2	A	-0.555876	FALSE
3	C03	LPE	0.137186	May	OSBPL2	3	A	-0.514852	FALSE
3	C03	PA	1.10557	May	OSBPL2	3	A	0.522801	FALSE
3	C03	DAG	2.51495	May	OSBPL2	3	A	0.624017	FALSE
3	C03	PG	0.820674	May	OSBPL2	3	A	-0.152171	FALSE
3	C03	PI	7.93785	May	OSBPL2	3	A	-1.34551	FALSE
3	C03	HCER	1.18507	May	OSBPL2	3	A	-0.377499	FALSE
3	C03	PE	21.8989	May	OSBPL2	3	A	0.559219	FALSE
3	C03	CE	3.0651	May	OSBPL2	3	A	0.424657	FALSE
3	C03	CER	0.3194	May	OSBPL2	3	A	-0.783788	FALSE
3	C03	LPC	0.236898	May	OSBPL2	3	A	-0.36942	FALSE
3	C03	SM	5.86732	May	OSBPL2	3	A	-0.0944745	FALSE
3	C03	LCER	0.258491	May	OSBPL2	3	A	-1.78516	FALSE
3	C03	PC	37.9855	May	OSBPL2	3	A	-0.0147847	FALSE
3	C03	DCER	0.0408273	May	OSBPL2	3	A	-1.13287	FALSE
3	C03	PS	4.4067	May	OSBPL2	3	A	-1.01833	FALSE
3	C03	FFA	8.06615	May	OSBPL2	3	A	-0.315828	FALSE
3	C03	TAG	4.1534	May	OSBPL2	3	A	1.34898	FALSE
4	C04	TAG	2.65205	May	OSBPL3	4	A	-0.673931	FALSE
4	C04	LPE	0.120676	May	OSBPL3	4	A	-1.03244	FALSE
4	C04	PA	1.16101	May	OSBPL3	4	A	0.728255	FALSE
4	C04	LPC	0.21603	May	OSBPL3	4	A	-0.735489	FALSE
4	C04	DCER	0.0384737	May	OSBPL3	4	A	-1.32917	FALSE
4	C04	PC	39.4424	May	OSBPL3	4	A	0.566993	FALSE
4	C04	LCER	0.269911	May	OSBPL3	4	A	-1.61865	FALSE
4	C04	PG	0.72097	May	OSBPL3	4	A	-1.12719	FALSE
4	C04	PI	8.15098	May	OSBPL3	4	A	-1.16436	FALSE
4	C04	CER	0.363126	May	OSBPL3	4	A	-0.270718	FALSE
4	C04	CE	2.99664	May	OSBPL3	4	A	0.323298	FALSE
4	C04	DAG	2.52728	May	OSBPL3	4	A	0.66857	FALSE
4	C04	PE	21.7373	May	OSBPL3	4	A	0.496514	FALSE
4	C04	PS	5.1074	May	OSBPL3	4	A	0.0671434	FALSE
4	C04	HCER	1.36079	May	OSBPL3	4	A	0.443559	FALSE
4	C04	SM	5.88223	May	OSBPL3	4	A	-0.0695524	FALSE
4	C04	FFA	7.25267	May	OSBPL3	4	A	-1.00229	FALSE
5	C05	PC	39.7928	May	OSBP2	5	A	0.70691	FALSE
5	C05	PG	0.667504	May	OSBP2	5	A	-1.65004	FALSE
5	C05	CE	2.6788	May	OSBP2	5	A	-0.147261	FALSE
5	C05	DCER	0.0472858	May	OSBP2	5	A	-0.594235	FALSE
5	C05	DAG	2.2229	May	OSBP2	5	A	-0.431139	FALSE
5	C05	LPC	0.21582	May	OSBP2	5	A	-0.73918	FALSE
5	C05	LPE	0.109831	May	OSBP2	5	A	-1.37245	FALSE
5	C05	PA	1.1573	May	OSBP2	5	A	0.714488	FALSE
5	C05	PE	20.836	May	OSBP2	5	A	0.146685	FALSE
5	C05	LCER	0.324947	May	OSBP2	5	A	-0.816234	FALSE
5	C05	PI	9.1088	May	OSBP2	5	A	-0.350293	FALSE
5	C05	CER	0.339211	May	OSBP2	5	A	-0.551325	FALSE
5	C05	FFA	7.87465	May	OSBP2	5	A	-0.477426	FALSE
5	C05	TAG	3.71658	May	OSBP2	5	A	0.760413	FALSE
5	C05	SM	5.5494	May	OSBP2	5	A	-0.626141	FALSE
5	C05	PS	4.16272	May	OSBP2	5	A	-1.39628	FALSE
5	C05	HCER	1.19545	May	OSBP2	5	A	-0.328981	FALSE
6	C06	PC	37.0142	May	OSBPL5	6	A	-0.402638	FALSE
6	C06	LCER	0.28623	May	OSBPL5	6	A	-1.38073	FALSE
6	C06	DCER	0.040161	May	OSBPL5	6	A	-1.18845	FALSE
6	C06	CE	2.27239	May	OSBPL5	6	A	-0.748928	FALSE
6	C06	LPC	0.31919	May	OSBPL5	6	A	1.07414	FALSE
6	C06	DAG	2.50704	May	OSBPL5	6	A	0.595443	FALSE
6	C06	PG	0.777773	May	OSBPL5	6	A	-0.571702	FALSE
6	C06	PI	10.1687	May	OSBPL5	6	A	0.550544	FALSE
6	C06	LPE	0.148033	May	OSBPL5	6	A	-0.1748	FALSE
6	C06	PE	20.8509	May	OSBPL5	6	A	0.15249	FALSE
6	C06	PA	0.618857	May	OSBPL5	6	A	-1.28067	FALSE
6	C06	PS	4.69814	May	OSBPL5	6	A	-0.566857	FALSE
6	C06	CER	0.282987	May	OSBPL5	6	A	-1.21106	FALSE
6	C06	TAG	2.81708	May	OSBPL5	6	A	-0.451574	FALSE
6	C06	SM	5.60697	May	OSBPL5	6	A	-0.529867	FALSE
6	C06	HCER	1.17134	May	OSBPL5	6	A	-0.441625	FALSE
6	C06	FFA	10.4199	May	OSBPL5	6	A	1.67044	FALSE
7	C07	PC	37.9469	May	OSBPL6	7	A	-0.0301958	FALSE
7	C07	DAG	2.19229	May	OSBPL6	7	A	-0.54174	FALSE
7	C07	CER	0.271444	May	OSBPL6	7	A	-1.34651	FALSE
7	C07	LCER	0.277142	May	OSBPL6	7	A	-1.51322	FALSE
7	C07	PI	10.1707	May	OSBPL6	7	A	0.552241	FALSE
7	C07	CE	2.25359	May	OSBPL6	7	A	-0.776768	FALSE
7	C07	PA	0.578124	May	OSBPL6	7	A	-1.43161	FALSE
7	C07	DCER	0.0310052	May	OSBPL6	7	A	-1.95205	FALSE
7	C07	HCER	1.099	May	OSBPL6	7	A	-0.779653	FALSE
7	C07	LPC	0.309393	May	OSBPL6	7	A	0.902281	FALSE
7	C07	LPE	0.139315	May	OSBPL6	7	A	-0.448102	FALSE
7	C07	PE	22.6151	May	OSBPL6	7	A	0.837182	FALSE
7	C07	PG	0.730211	May	OSBPL6	7	A	-1.03682	FALSE
7	C07	SM	5.0299	May	OSBPL6	7	A	-1.49491	FALSE
7	C07	PS	4.752	May	OSBPL6	7	A	-0.48341	FALSE
7	C07	TAG	2.89871	May	OSBPL6	7	A	-0.34158	FALSE
7	C07	FFA	8.70517	May	OSBPL6	7	A	0.223415	FALSE
8	C08	PI	8.36253	May	OSBPL7	8	A	-0.984562	FALSE
8	C08	DCER	0.0368485	May	OSBPL7	8	A	-1.46471	FALSE
8	C08	PC	39.7283	May	OSBPL7	8	A	0.681138	FALSE
8	C08	PA	0.799067	May	OSBPL7	8	A	-0.612916	FALSE
8	C08	CE	2.72298	May	OSBPL7	8	A	-0.0818401	FALSE
8	C08	DAG	2.17211	May	OSBPL7	8	A	-0.614636	FALSE
8	C08	LCER	0.297383	May	OSBPL7	8	A	-1.21811	FALSE
8	C08	HCER	1.19903	May	OSBPL7	8	A	-0.312284	FALSE
8	C08	TAG	2.95843	May	OSBPL7	8	A	-0.261108	FALSE
8	C08	LPE	0.116765	May	OSBPL7	8	A	-1.15507	FALSE
8	C08	PG	0.733567	May	OSBPL7	8	A	-1.004	FALSE
8	C08	SM	5.95256	May	OSBPL7	8	A	0.0480754	FALSE
8	C08	LPC	0.234849	May	OSBPL7	8	A	-0.405366	FALSE
8	C08	PE	21.9867	May	OSBPL7	8	A	0.593304	FALSE
8	C08	CER	0.321297	May	OSBPL7	8	A	-0.761533	FALSE
8	C08	PS	5.09362	May	OSBPL7	8	A	0.0457941	FALSE
8	C08	FFA	7.28395	May	OSBPL7	8	A	-0.975898	FALSE
9	C09	PA	0.690717	May	OSBPL8	9	A	-1.0144	FALSE
9	C09	TAG	2.44107	May	OSBPL8	9	A	-0.958202	FALSE
9	C09	LPE	0.176288	May	OSBPL8	9	A	0.711017	FALSE
9	C09	PC	40.9527	May	OSBPL8	9	A	1.17006	FALSE
9	C09	CE	4.18214	May	OSBPL8	9	A	2.07839	FALSE
9	C09	PI	9.26726	May	OSBPL8	9	A	-0.215609	FALSE
9	C09	DAG	1.54829	May	OSBPL8	9	A	-2.86845	FALSE
9	C09	DCER	0.047781	May	OSBPL8	9	A	-0.552936	FALSE
9	C09	LCER	0.645102	May	OSBPL8	9	A	3.8516	FALSE
9	C09	CER	0.448133	May	OSBPL8	9	A	0.726754	FALSE
9	C09	PG	1.07079	May	OSBPL8	9	A	2.29378	FALSE
9	C09	SM	6.11285	May	OSBPL8	9	A	0.316121	FALSE
9	C09	HCER	1.35623	May	OSBPL8	9	A	0.422278	FALSE
9	C09	FFA	6.79994	May	OSBPL8	9	A	-1.38434	FALSE
9	C09	LPC	0.327599	May	OSBPL8	9	A	1.22165	FALSE
9	C09	PE	18.5918	May	OSBPL8	9	A	-0.724333	FALSE
9	C09	PS	5.34137	May	OSBPL8	9	A	0.429592	FALSE
10	C10	PS	4.41695	May	OSBPL9	10	A	-1.00245	FALSE
10	C10	CER	0.615139	May	OSBPL9	10	A	2.68639	FALSE
10	C10	PI	9.42291	May	OSBPL9	10	A	-0.0833256	FALSE
10	C10	PA	0.947385	May	OSBPL9	10	A	-0.0633344	FALSE
10	C10	PG	1.12572	May	OSBPL9	10	A	2.83088	FALSE
10	C10	CE	3.16801	May	OSBPL9	10	A	0.576997	FALSE
10	C10	PC	38.7115	May	OSBPL9	10	A	0.275128	FALSE
10	C10	LCER	0.423398	May	OSBPL9	10	A	0.61918	FALSE
10	C10	PE	19.6991	May	OSBPL9	10	A	-0.294576	FALSE
10	C10	TAG	2.38724	May	OSBPL9	10	A	-1.03074	FALSE
10	C10	SM	3.7184	May	OSBPL9	10	A	-3.68815	FALSE
10	C10	DAG	2.64132	May	OSBPL9	10	A	1.08061	FALSE
10	C10	DCER	0.0557496	May	OSBPL9	10	A	0.111652	FALSE
10	C10	LPE	0.13094	May	OSBPL9	10	A	-0.710678	FALSE
10	C10	FFA	9.67313	May	OSBPL9	10	A	1.04024	FALSE
10	C10	LPC	0.28911	May	OSBPL9	10	A	0.546472	FALSE
10	C10	HCER	2.57402	May	OSBPL9	10	A	6.11254	FALSE
11	C11	TAG	2.69239	May	OSBPL10	11	A	-0.619572	FALSE
11	C11	CER	0.372714	May	OSBPL10	11	A	-0.158208	FALSE
11	C11	FFA	9.10231	May	OSBPL10	11	A	0.558547	FALSE
11	C11	PA	0.942761	May	OSBPL10	11	A	-0.080468	FALSE
11	C11	DAG	2.1731	May	OSBPL10	11	A	-0.611039	FALSE
11	C11	LPE	0.139977	May	OSBPL10	11	A	-0.427356	FALSE
11	C11	PI	9.76126	May	OSBPL10	11	A	0.204245	FALSE
11	C11	PS	5.7914	May	OSBPL10	11	A	1.12675	FALSE
11	C11	LPC	0.257972	May	OSBPL10	11	A	0.000246681	FALSE
11	C11	LCER	0.276864	May	OSBPL10	11	A	-1.51728	FALSE
11	C11	SM	5.82639	May	OSBPL10	11	A	-0.162927	FALSE
11	C11	PE	19.6375	May	OSBPL10	11	A	-0.318457	FALSE
11	C11	DCER	0.0566201	May	OSBPL10	11	A	0.184251	FALSE
11	C11	CE	2.58646	May	OSBPL10	11	A	-0.283964	FALSE
11	C11	HCER	1.30339	May	OSBPL10	11	A	0.175352	FALSE
11	C11	PG	0.831822	May	OSBPL10	11	A	-0.0431586	FALSE
11	C11	PC	38.2471	May	OSBPL10	11	A	0.089654	FALSE
15	C15	PA	0.555149	May	STARD3	3	B	-1.51674	FALSE
15	C15	PE	20.1246	May	STARD3	3	B	-0.129422	FALSE
15	C15	PS	5.19052	May	STARD3	3	B	0.195908	FALSE
15	C15	FFA	9.19186	May	STARD3	3	B	0.63412	FALSE
15	C15	LPE	0.154501	May	STARD3	3	B	0.0279845	FALSE
15	C15	DAG	1.88247	May	STARD3	3	B	-1.66108	FALSE
15	C15	PG	0.860268	May	STARD3	3	B	0.235018	FALSE
15	C15	CE	2.08288	May	STARD3	3	B	-1.02949	FALSE
15	C15	LCER	0.326928	May	STARD3	3	B	-0.787345	FALSE
15	C15	LPC	0.271923	May	STARD3	3	B	0.244981	FALSE
15	C15	DCER	0.0402904	May	STARD3	3	B	-1.17765	FALSE
15	C15	PI	11.0221	May	STARD3	3	B	1.27582	FALSE
15	C15	SM	5.63545	May	STARD3	3	B	-0.482241	FALSE
15	C15	PC	37.7879	May	STARD3	3	B	-0.0937039	FALSE
15	C15	CER	0.318618	May	STARD3	3	B	-0.792962	FALSE
15	C15	HCER	1.3254	May	STARD3	3	B	0.278236	FALSE
15	C15	TAG	3.22922	May	STARD3	3	B	0.103748	FALSE
16	C16	TAG	3.72317	May	STARD4	4	B	0.769298	FALSE
16	C16	LPC	0.296459	May	STARD4	4	B	0.675386	FALSE
16	C16	HCER	1.17062	May	STARD4	4	B	-0.444996	FALSE
16	C16	PS	4.88293	May	STARD4	4	B	-0.280584	FALSE
16	C16	CE	2.13184	May	STARD4	4	B	-0.957016	FALSE
16	C16	LPE	0.159212	May	STARD4	4	B	0.175685	FALSE
16	C16	DCER	0.0415032	May	STARD4	4	B	-1.07651	FALSE
16	C16	PI	9.24946	May	STARD4	4	B	-0.230744	FALSE
16	C16	DAG	1.8504	May	STARD4	4	B	-1.77696	FALSE
16	C16	PA	0.504713	May	STARD4	4	B	-1.70362	FALSE
16	C16	FFA	8.7196	May	STARD4	4	B	0.235598	FALSE
16	C16	SM	5.44469	May	STARD4	4	B	-0.801251	FALSE
16	C16	PC	37.6335	May	STARD4	4	B	-0.15536	FALSE
16	C16	PG	0.97016	May	STARD4	4	B	1.30967	FALSE
16	C16	LCER	0.3287	May	STARD4	4	B	-0.761507	FALSE
16	C16	CER	0.26527	May	STARD4	4	B	-1.41895	FALSE
16	C16	PE	22.6278	May	STARD4	4	B	0.84211	FALSE
17	C17	PG	0.924552	May	STARD5	5	B	0.863659	FALSE
17	C17	LPC	0.267914	May	STARD5	5	B	0.174658	FALSE
17	C17	CE	2.38598	May	STARD5	5	B	-0.580767	FALSE
17	C17	SM	6.23946	May	STARD5	5	B	0.527849	FALSE
17	C17	PC	33.2837	May	STARD5	5	B	-1.8923	FALSE
17	C17	LCER	0.402663	May	STARD5	5	B	0.316861	FALSE
17	C17	PA	1.36195	May	STARD5	5	B	1.47279	FALSE
17	C17	PS	4.68023	May	STARD5	5	B	-0.5946	FALSE
17	C17	HCER	1.41437	May	STARD5	5	B	0.693918	FALSE
17	C17	PI	9.32492	May	STARD5	5	B	-0.166606	FALSE
17	C17	CER	0.351424	May	STARD5	5	B	-0.408027	FALSE
17	C17	DCER	0.0464897	May	STARD5	5	B	-0.660629	FALSE
17	C17	DAG	2.08242	May	STARD5	5	B	-0.938671	FALSE
17	C17	PE	24.6478	May	STARD5	5	B	1.6261	FALSE
17	C17	FFA	7.84286	May	STARD5	5	B	-0.504253	FALSE
17	C17	TAG	4.56395	May	STARD5	5	B	1.90216	FALSE
17	C17	LPE	0.179289	May	STARD5	5	B	0.805089	FALSE
18	C18	PA	1.19895	May	STARD6	6	B	0.868838	FALSE
18	C18	PC	39.6098	May	STARD6	6	B	0.633825	FALSE
18	C18	PS	4.58692	May	STARD6	6	B	-0.739143	FALSE
18	C18	SM	6.20343	May	STARD6	6	B	0.467596	FALSE
18	C18	TAG	4.05978	May	STARD6	6	B	1.22284	FALSE
18	C18	CE	2.49655	May	STARD6	6	B	-0.417071	FALSE
18	C18	HCER	1.53246	May	STARD6	6	B	1.24574	FALSE
18	C18	PI	3.84261	May	STARD6	6	B	-4.82614	FALSE
18	C18	LCER	0.387857	May	STARD6	6	B	0.100985	FALSE
18	C18	DAG	2.24508	May	STARD6	6	B	-0.35101	FALSE
18	C18	FFA	9.36545	May	STARD6	6	B	0.780604	FALSE
18	C18	DCER	0.0538931	May	STARD6	6	B	-0.0431782	FALSE
18	C18	PE	22.6383	May	STARD6	6	B	0.846178	FALSE
18	C18	LPC	0.271542	May	STARD6	6	B	0.238304	FALSE
18	C18	PG	0.963657	May	STARD6	6	B	1.24608	FALSE
18	C18	LPE	0.186568	May	STARD6	6	B	1.03331	FALSE
18	C18	CER	0.357181	May	STARD6	6	B	-0.340468	FALSE
21	C21	CE	2.57421	May	STARD9	9	B	-0.30209	FALSE
21	C21	PC	43.0679	May	STARD9	9	B	2.01471	FALSE
21	C21	PA	0.995424	May	STARD9	9	B	0.114673	FALSE
21	C21	FFA	7.23347	May	STARD9	9	B	-1.01849	FALSE
21	C21	PS	3.88153	May	STARD9	9	B	-1.83188	FALSE
21	C21	LPC	0.295916	May	STARD9	9	B	0.665862	FALSE
21	C21	LCER	0.372858	May	STARD9	9	B	-0.117697	FALSE
21	C21	TAG	2.69233	May	STARD9	9	B	-0.619657	FALSE
21	C21	HCER	1.32391	May	STARD9	9	B	0.271273	FALSE
21	C21	PI	8.40782	May	STARD9	9	B	-0.946069	FALSE
21	C21	LPE	0.148182	May	STARD9	9	B	-0.170122	FALSE
21	C21	SM	6.02117	May	STARD9	9	B	0.162808	FALSE
21	C21	DAG	2.49714	May	STARD9	9	B	0.559675	FALSE
21	C21	PG	0.863851	May	STARD9	9	B	0.27006	FALSE
21	C21	DCER	NA	May	STARD9	9	B	NA	FALSE
21	C21	CER	0.352275	May	STARD9	9	B	-0.398033	FALSE
21	C21	PE	19.272	May	STARD9	9	B	-0.460309	FALSE
25	C24	PS	3.87462	May	STARD13	12	B	-1.84259	FALSE
25	C24	CE	2.31217	May	STARD13	12	B	-0.690045	FALSE
25	C24	PC	40.7136	May	STARD13	12	B	1.07458	FALSE
25	C24	DCER	0.046044	May	STARD13	12	B	-0.697803	FALSE
25	C24	FFA	6.18717	May	STARD13	12	B	-1.90143	FALSE
25	C24	PA	0.953942	May	STARD13	12	B	-0.039038	FALSE
25	C24	PG	0.821443	May	STARD13	12	B	-0.144647	FALSE
25	C24	TAG	4.13715	May	STARD13	12	B	1.32709	FALSE
25	C24	LPE	0.183621	May	STARD13	12	B	0.940914	FALSE
25	C24	LPC	0.239928	May	STARD13	12	B	-0.31627	FALSE
25	C24	PI	8.21677	May	STARD13	12	B	-1.10844	FALSE
25	C24	HCER	1.16379	May	STARD13	12	B	-0.476928	FALSE
25	C24	LCER	0.300994	May	STARD13	12	B	-1.16547	FALSE
25	C24	DAG	2.42284	May	STARD13	12	B	0.29125	FALSE
25	C24	PE	22.2661	May	STARD13	12	B	0.701735	FALSE
25	C24	SM	5.87226	May	STARD13	12	B	-0.0862156	FALSE
25	C24	CER	0.287591	May	STARD13	12	B	-1.15703	FALSE
26	C25	CE	2.79021	May	ACOT11	1	C	0.017691	FALSE
26	C25	LPC	0.227345	May	ACOT11	1	C	-0.537011	FALSE
26	C25	PS	5.00651	May	ACOT11	1	C	-0.0891436	FALSE
26	C25	DCER	0.0367133	May	ACOT11	1	C	-1.47599	FALSE
26	C25	PC	41.1845	May	ACOT11	1	C	1.26265	FALSE
26	C25	PI	8.01265	May	ACOT11	1	C	-1.28194	FALSE
26	C25	FFA	6.80031	May	ACOT11	1	C	-1.38402	FALSE
26	C25	PA	1.34449	May	ACOT11	1	C	1.40811	FALSE
26	C25	TAG	2.3614	May	ACOT11	1	C	-1.06555	FALSE
26	C25	LCER	0.309435	May	ACOT11	1	C	-1.0424	FALSE
26	C25	LPE	0.131826	May	ACOT11	1	C	-0.682899	FALSE
26	C25	DAG	2.47476	May	ACOT11	1	C	0.478829	FALSE
26	C25	CER	0.340155	May	ACOT11	1	C	-0.540254	FALSE
26	C25	SM	6.03553	May	ACOT11	1	C	0.186816	FALSE
26	C25	HCER	1.29615	May	ACOT11	1	C	0.141536	FALSE
26	C25	PE	20.9197	May	ACOT11	1	C	0.179155	FALSE
26	C25	PG	0.728347	May	ACOT11	1	C	-1.05505	FALSE
27	C26	PC	34.9872	May	ACOT12	2	C	-1.21207	FALSE
27	C26	LPC	0.264324	May	ACOT12	2	C	0.111689	FALSE
27	C26	CE	2.55361	May	ACOT12	2	C	-0.332598	FALSE
27	C26	TAG	4.1883	May	ACOT12	2	C	1.39601	FALSE
27	C26	FFA	8.16947	May	ACOT12	2	C	-0.228639	FALSE
27	C26	PA	1.00308	May	ACOT12	2	C	0.143023	FALSE
27	C26	PS	4.86846	May	ACOT12	2	C	-0.302999	FALSE
27	C26	LPE	0.136978	May	ACOT12	2	C	-0.521371	FALSE
27	C26	LCER	0.383721	May	ACOT12	2	C	0.0406895	FALSE
27	C26	HCER	1.27405	May	ACOT12	2	C	0.0382892	FALSE
27	C26	SM	6.74607	May	ACOT12	2	C	1.37507	FALSE
27	C26	PI	9.45308	May	ACOT12	2	C	-0.0576805	FALSE
27	C26	PG	0.834142	May	ACOT12	2	C	-0.0204654	FALSE
27	C26	CER	0.363207	May	ACOT12	2	C	-0.269761	FALSE
27	C26	DCER	0.06578	May	ACOT12	2	C	0.9482	FALSE
27	C26	DAG	2.1463	May	ACOT12	2	C	-0.707898	FALSE
27	C26	PE	22.5622	May	ACOT12	2	C	0.816659	FALSE
28	C27	PC	37.1072	May	NPC1	3	C	-0.3655	FALSE
28	C27	CE	2.57711	May	NPC1	3	C	-0.297796	FALSE
28	C27	PS	5.44951	May	NPC1	3	C	0.597112	FALSE
28	C27	LPE	0.173615	May	NPC1	3	C	0.62722	FALSE
28	C27	DCER	0.0887852	May	NPC1	3	C	2.86684	FALSE
28	C27	FFA	9.62756	May	NPC1	3	C	1.00179	FALSE
28	C27	HCER	1.35033	May	NPC1	3	C	0.394718	FALSE
28	C27	DAG	2.12489	May	NPC1	3	C	-0.785245	FALSE
28	C27	SM	6.40934	May	NPC1	3	C	0.811953	FALSE
28	C27	PG	1.00782	May	NPC1	3	C	1.67798	FALSE
28	C27	CER	0.630661	May	NPC1	3	C	2.86852	FALSE
28	C27	LCER	0.438582	May	NPC1	3	C	0.84056	FALSE
28	C27	PI	11.0953	May	NPC1	3	C	1.33812	FALSE
28	C27	TAG	2.52229	May	NPC1	3	C	-0.848767	FALSE
28	C27	PA	0.625901	May	NPC1	3	C	-1.25457	FALSE
28	C27	LPC	0.342473	May	NPC1	3	C	1.48258	FALSE
28	C27	PE	18.4285	May	NPC1	3	C	-0.78768	FALSE
29	C28	PC	35.569	May	NPC1L1	4	C	-0.97976	FALSE
29	C28	FFA	9.23573	May	NPC1L1	4	C	0.671139	FALSE
29	C28	CE	2.31167	May	NPC1L1	4	C	-0.690784	FALSE
29	C28	PS	5.59519	May	NPC1L1	4	C	0.822789	FALSE
29	C28	LPE	0.139804	May	NPC1L1	4	C	-0.432784	FALSE
29	C28	SM	5.69995	May	NPC1L1	4	C	-0.374383	FALSE
29	C28	PG	0.989129	May	NPC1L1	4	C	1.49517	FALSE
29	C28	DCER	0.0456036	May	NPC1L1	4	C	-0.734531	FALSE
29	C28	HCER	1.38301	May	NPC1L1	4	C	0.547395	FALSE
29	C28	CER	0.351909	May	NPC1L1	4	C	-0.402328	FALSE
29	C28	DAG	2.15516	May	NPC1L1	4	C	-0.675866	FALSE
29	C28	PE	21.8176	May	NPC1L1	4	C	0.527669	FALSE
29	C28	LPC	0.291981	May	NPC1L1	4	C	0.596842	FALSE
29	C28	PI	10.7593	May	NPC1L1	4	C	1.05249	FALSE
29	C28	PA	0.6671	May	NPC1L1	4	C	-1.10191	FALSE
29	C28	LCER	0.332644	May	NPC1L1	4	C	-0.704004	FALSE
29	C28	TAG	2.65526	May	NPC1L1	4	C	-0.669607	FALSE
30	C29	PC	35.3296	May	NPC2	5	C	-1.07534	FALSE
30	C29	CE	2.39216	May	NPC2	5	C	-0.571608	FALSE
30	C29	PS	4.76206	May	NPC2	5	C	-0.467824	FALSE
30	C29	FFA	10.0672	May	NPC2	5	C	1.37277	FALSE
30	C29	HCER	1.39711	May	NPC2	5	C	0.613278	FALSE
30	C29	LPE	0.15599	May	NPC2	5	C	0.074661	FALSE
30	C29	PI	9.40034	May	NPC2	5	C	-0.102507	FALSE
30	C29	DAG	2.24781	May	NPC2	5	C	-0.341138	FALSE
30	C29	SM	7.54175	May	NPC2	5	C	2.70571	FALSE
30	C29	PA	0.489146	May	NPC2	5	C	-1.76131	FALSE
30	C29	PG	1.07277	May	NPC2	5	C	2.31314	FALSE
30	C29	LPC	0.307613	May	NPC2	5	C	0.871055	FALSE
30	C29	DCER	0.0626911	May	NPC2	5	C	0.690582	FALSE
30	C29	LCER	0.387015	May	NPC2	5	C	0.0887189	FALSE
30	C29	CER	0.540284	May	NPC2	5	C	1.80804	FALSE
30	C29	PE	19.803	May	NPC2	5	C	-0.254239	FALSE
30	C29	TAG	4.04347	May	NPC2	5	C	1.20086	FALSE
31	C30	PS	5.80972	May	LY86	6	C	1.15513	FALSE
31	C30	SM	5.71041	May	LY86	6	C	-0.356891	FALSE
31	C30	CE	2.91072	May	LY86	6	C	0.196102	FALSE
31	C30	DAG	2.37751	May	LY86	6	C	0.127456	FALSE
31	C30	LPE	0.164575	May	LY86	6	C	0.343792	FALSE
31	C30	PC	36.8723	May	LY86	6	C	-0.459299	FALSE
31	C30	FFA	10.316	May	LY86	6	C	1.58273	FALSE
31	C30	LPC	0.335521	May	LY86	6	C	1.36063	FALSE
31	C30	HCER	1.27609	May	LY86	6	C	0.0478199	FALSE
31	C30	PG	1.07223	May	LY86	6	C	2.30786	FALSE
31	C30	DCER	0.0466157	May	LY86	6	C	-0.650121	FALSE
31	C30	PA	0.619145	May	LY86	6	C	-1.27961	FALSE
31	C30	LCER	0.350087	May	LY86	6	C	-0.449691	FALSE
31	C30	PI	10.3186	May	LY86	6	C	0.677945	FALSE
31	C30	PE	19.0031	May	LY86	6	C	-0.564704	FALSE
31	C30	CER	0.431064	May	LY86	6	C	0.52647	FALSE
31	C30	TAG	2.38632	May	LY86	6	C	-1.03197	FALSE
32	C31	PC	39.7852	May	LY96	7	C	0.703877	FALSE
32	C31	SM	5.82834	May	LY96	7	C	-0.159668	FALSE
32	C31	CE	2.27844	May	LY96	7	C	-0.739967	FALSE
32	C31	FFA	7.92331	May	LY96	7	C	-0.436362	FALSE
32	C31	PS	5.2139	May	LY96	7	C	0.232131	FALSE
32	C31	LPE	0.196956	May	LY96	7	C	1.35897	FALSE
32	C31	LPC	0.323435	May	LY96	7	C	1.14861	FALSE
32	C31	DAG	2.0562	May	LY96	7	C	-1.03342	FALSE
32	C31	DCER	0.0478781	May	LY96	7	C	-0.544833	FALSE
32	C31	HCER	1.26543	May	LY96	7	C	-0.00202246	FALSE
32	C31	PI	10.4705	May	LY96	7	C	0.807055	FALSE
32	C31	CER	0.362491	May	LY96	7	C	-0.278166	FALSE
32	C31	PE	19.2066	May	LY96	7	C	-0.485702	FALSE
32	C31	PG	0.717563	May	LY96	7	C	-1.16051	FALSE
32	C31	PA	0.537117	May	LY96	7	C	-1.58356	FALSE
32	C31	TAG	3.43857	May	LY96	7	C	0.385818	FALSE
32	C31	LCER	0.348038	May	LY96	7	C	-0.479574	FALSE
33	C32	PS	4.82661	May	GM2A	8	C	-0.36783	FALSE
33	C32	LPE	0.219551	May	GM2A	8	C	2.06732	FALSE
33	C32	CE	2.44394	May	GM2A	8	C	-0.494954	FALSE
33	C32	PC	37.3133	May	GM2A	8	C	-0.283229	FALSE
33	C32	FFA	6.65815	May	GM2A	8	C	-1.50398	FALSE
33	C32	SM	6.54938	May	GM2A	8	C	1.04614	FALSE
33	C32	LPC	0.269406	May	GM2A	8	C	0.200821	FALSE
33	C32	PA	0.717765	May	GM2A	8	C	-0.914177	FALSE
33	C32	PG	0.877581	May	GM2A	8	C	0.404328	FALSE
33	C32	LCER	0.310065	May	GM2A	8	C	-1.03321	FALSE
33	C32	DCER	0.0450896	May	GM2A	8	C	-0.777398	FALSE
33	C32	CER	0.356283	May	GM2A	8	C	-0.351013	FALSE
33	C32	PI	10.1046	May	GM2A	8	C	0.496079	FALSE
33	C32	HCER	1.23273	May	GM2A	8	C	-0.154805	FALSE
33	C32	PE	22.5494	May	GM2A	8	C	0.811692	FALSE
33	C32	DAG	2.19789	May	GM2A	8	C	-0.521483	FALSE
33	C32	TAG	3.32825	May	GM2A	8	C	0.237183	FALSE
34	C33	CE	1.85932	May	PITPNM1	9	C	-1.36046	FALSE
34	C33	PS	4.52712	May	PITPNM1	9	C	-0.831786	FALSE
34	C33	PA	0.578178	May	PITPNM1	9	C	-1.43141	FALSE
34	C33	DAG	1.97077	May	PITPNM1	9	C	-1.34205	FALSE
34	C33	FFA	9.46168	May	PITPNM1	9	C	0.861811	FALSE
34	C33	PC	37.0282	May	PITPNM1	9	C	-0.397052	FALSE
34	C33	LPC	0.465817	May	PITPNM1	9	C	3.64628	FALSE
34	C33	SM	5.491	May	PITPNM1	9	C	-0.723811	FALSE
34	C33	CER	0.271838	May	PITPNM1	9	C	-1.34188	FALSE
34	C33	TAG	3.1492	May	PITPNM1	9	C	-0.00407554	FALSE
34	C33	PE	22.6668	May	PITPNM1	9	C	0.857254	FALSE
34	C33	LPE	0.163148	May	PITPNM1	9	C	0.299076	FALSE
34	C33	PI	10.1024	May	PITPNM1	9	C	0.494167	FALSE
34	C33	LCER	0.292911	May	PITPNM1	9	C	-1.28332	FALSE
34	C33	DCER	0.0402168	May	PITPNM1	9	C	-1.18379	FALSE
34	C33	HCER	1.15903	May	PITPNM1	9	C	-0.499161	FALSE
34	C33	PG	0.772364	May	PITPNM1	9	C	-0.624598	FALSE
35	C34	PC	39.5181	May	PITPNM2	10	C	0.597204	FALSE
35	C34	FFA	8.21471	May	PITPNM2	10	C	-0.190462	FALSE
35	C34	LPE	0.184141	May	PITPNM2	10	C	0.957203	FALSE
35	C34	CE	2.2442	May	PITPNM2	10	C	-0.790667	FALSE
35	C34	PS	4.52968	May	PITPNM2	10	C	-0.827819	FALSE
35	C34	PA	0.529086	May	PITPNM2	10	C	-1.61331	FALSE
35	C34	HCER	1.11762	May	PITPNM2	10	C	-0.692645	FALSE
35	C34	DCER	0.0448243	May	PITPNM2	10	C	-0.799519	FALSE
35	C34	PI	9.56009	May	PITPNM2	10	C	0.0332742	FALSE
35	C34	SM	5.64664	May	PITPNM2	10	C	-0.463523	FALSE
35	C34	LPC	0.382334	May	PITPNM2	10	C	2.18181	FALSE
35	C34	CER	0.316175	May	PITPNM2	10	C	-0.821638	FALSE
35	C34	DAG	2.09763	May	PITPNM2	10	C	-0.883708	FALSE
35	C34	PG	0.730357	May	PITPNM2	10	C	-1.03539	FALSE
35	C34	LCER	0.414717	May	PITPNM2	10	C	0.492612	FALSE
35	C34	PE	21.4985	May	PITPNM2	10	C	0.403828	FALSE
35	C34	TAG	2.97117	May	PITPNM2	10	C	-0.243955	FALSE
36	C35	FFA	7.09061	May	PITPNC1	11	C	-1.13905	FALSE
36	C35	PC	40.056	May	PITPNC1	11	C	0.811996	FALSE
36	C35	CE	2.58448	May	PITPNC1	11	C	-0.28689	FALSE
36	C35	PI	9.46798	May	PITPNC1	11	C	-0.0450194	FALSE
36	C35	PS	4.99015	May	PITPNC1	11	C	-0.114488	FALSE
36	C35	DCER	0.0522942	May	PITPNC1	11	C	-0.176531	FALSE
36	C35	HCER	1.21494	May	PITPNC1	11	C	-0.237928	FALSE
36	C35	PE	19.1457	May	PITPNC1	11	C	-0.509359	FALSE
36	C35	PA	1.51536	May	PITPNC1	11	C	2.04125	FALSE
36	C35	LPE	0.156671	May	PITPNC1	11	C	0.0959986	FALSE
36	C35	PG	0.827773	May	PITPNC1	11	C	-0.0827502	FALSE
36	C35	SM	6.19603	May	PITPNC1	11	C	0.455229	FALSE
36	C35	LCER	0.487475	May	PITPNC1	11	C	1.55342	FALSE
36	C35	CER	0.390086	May	PITPNC1	11	C	0.0456295	FALSE
36	C35	LPC	0.232215	May	PITPNC1	11	C	-0.451583	FALSE
36	C35	TAG	2.89852	May	PITPNC1	11	C	-0.341837	FALSE
36	C35	DAG	2.69379	May	PITPNC1	11	C	1.27017	FALSE
38	C36	DCER	0.0475742	May	PITPNB	12	C	-0.570181	FALSE
38	C36	CER	0.337038	May	PITPNB	12	C	-0.576823	FALSE
38	C36	CE	2.15644	May	PITPNB	12	C	-0.92059	FALSE
38	C36	HCER	1.47245	May	PITPNB	12	C	0.965309	FALSE
38	C36	LPE	0.138476	May	PITPNB	12	C	-0.474417	FALSE
38	C36	SM	5.50778	May	PITPNB	12	C	-0.695748	FALSE
38	C36	PC	38.1964	May	PITPNB	12	C	0.0694259	FALSE
38	C36	FFA	9.25389	May	PITPNB	12	C	0.686465	FALSE
38	C36	PI	9.5031	May	PITPNB	12	C	-0.0151682	FALSE
38	C36	PS	5.00579	May	PITPNB	12	C	-0.090261	FALSE
38	C36	PE	21.1112	May	PITPNB	12	C	0.253495	FALSE
38	C36	DAG	2.21277	May	PITPNB	12	C	-0.467737	FALSE
38	C36	LPC	0.377117	May	PITPNB	12	C	2.09029	FALSE
38	C36	LCER	0.243844	May	PITPNB	12	C	-1.9987	FALSE
38	C36	TAG	3.20568	May	PITPNB	12	C	0.0720238	FALSE
38	C36	PG	0.737214	May	PITPNB	12	C	-0.968334	FALSE
38	C36	PA	0.493257	May	PITPNB	12	C	-1.74608	FALSE
39	C37	PS	5.82133	May	PITPNA	1	D	1.17311	FALSE
39	C37	PC	35.2879	May	PITPNA	1	D	-1.09201	FALSE
39	C37	CE	4.08253	May	PITPNA	1	D	1.93092	FALSE
39	C37	HCER	1.42835	May	PITPNA	1	D	0.75924	FALSE
39	C37	PI	10.747	May	PITPNA	1	D	1.04208	FALSE
39	C37	FFA	8.01007	May	PITPNA	1	D	-0.363151	FALSE
39	C37	PE	18.8104	May	PITPNA	1	D	-0.639474	FALSE
39	C37	DCER	0.0533996	May	PITPNA	1	D	-0.0843377	FALSE
39	C37	LPE	0.10458	May	PITPNA	1	D	-1.53708	FALSE
39	C37	SM	6.71534	May	PITPNA	1	D	1.32367	FALSE
39	C37	TAG	3.60039	May	PITPNA	1	D	0.603855	FALSE
39	C37	DAG	2.60572	May	PITPNA	1	D	0.951959	FALSE
39	C37	PG	0.966899	May	PITPNA	1	D	1.27778	FALSE
39	C37	CER	0.50824	May	PITPNA	1	D	1.43204	FALSE
39	C37	LPC	0.141032	May	PITPNA	1	D	-2.05112	FALSE
39	C37	LCER	0.386765	May	PITPNA	1	D	0.0850659	FALSE
39	C37	PA	0.730061	May	PITPNA	1	D	-0.868613	FALSE
40	C38	SM	6.77425	May	PITPNM3	2	D	1.4222	FALSE
40	C38	DAG	2.36468	May	PITPNM3	2	D	0.081123	FALSE
40	C38	LPE	0.132765	May	PITPNM3	2	D	-0.653444	FALSE
40	C38	DCER	NA	May	PITPNM3	2	D	NA	FALSE
40	C38	PE	20.3093	May	PITPNM3	2	D	-0.0577393	FALSE
40	C38	PC	34.6803	May	PITPNM3	2	D	-1.33461	FALSE
40	C38	HCER	1.29327	May	PITPNM3	2	D	0.128074	FALSE
40	C38	PG	0.953026	May	PITPNM3	2	D	1.14211	FALSE
40	C38	PI	10.7473	May	PITPNM3	2	D	1.04228	FALSE
40	C38	CE	3.06336	May	PITPNM3	2	D	0.422077	FALSE
40	C38	PS	6.53049	May	PITPNM3	2	D	2.2717	FALSE
40	C38	FFA	8.39595	May	PITPNM3	2	D	-0.0375244	FALSE
40	C38	LPC	0.236601	May	PITPNM3	2	D	-0.37464	FALSE
40	C38	CER	0.455731	May	PITPNM3	2	D	0.815904	FALSE
40	C38	PA	1.02799	May	PITPNM3	2	D	0.235324	FALSE
40	C38	LCER	0.415664	May	PITPNM3	2	D	0.506419	FALSE
40	C38	TAG	2.61935	May	PITPNM3	2	D	-0.717995	FALSE
41	C39	DAG	2.46359	May	SCP2	3	D	0.438471	FALSE
41	C39	TAG	2.59821	May	SCP2	3	D	-0.746472	FALSE
41	C39	CE	6.62954	May	SCP2	3	D	5.70167	FALSE
41	C39	PS	5.90435	May	SCP2	3	D	1.30173	FALSE
41	C39	DCER	0.0742262	May	SCP2	3	D	1.65262	FALSE
41	C39	LCER	0.507885	May	SCP2	3	D	1.85099	FALSE
41	C39	HCER	1.29508	May	SCP2	3	D	0.136548	FALSE
41	C39	PG	0.903071	May	SCP2	3	D	0.653594	FALSE
41	C39	PI	11.0228	May	SCP2	3	D	1.27647	FALSE
41	C39	PE	17.82	May	SCP2	3	D	-1.02385	FALSE
41	C39	PC	32.8639	May	SCP2	3	D	-2.05996	FALSE
41	C39	CER	0.74253	May	SCP2	3	D	4.18119	FALSE
41	C39	LPE	0.109612	May	SCP2	3	D	-1.37933	FALSE
41	C39	SM	5.78257	May	SCP2	3	D	-0.236208	FALSE
41	C39	LPC	0.179347	May	SCP2	3	D	-1.37899	FALSE
41	C39	FFA	10.5693	May	SCP2	3	D	1.79649	FALSE
41	C39	PA	0.533941	May	SCP2	3	D	-1.59532	FALSE
42	C40	DAG	2.0593	May	SCP2D1	4	D	-1.02222	FALSE
42	C40	TAG	3.35589	May	SCP2D1	4	D	0.274418	FALSE
42	C40	LPE	0.142071	May	SCP2D1	4	D	-0.361697	FALSE
42	C40	DCER	0.0544537	May	SCP2D1	4	D	0.00357811	FALSE
42	C40	CE	2.38173	May	SCP2D1	4	D	-0.587056	FALSE
42	C40	PI	10.4656	May	SCP2D1	4	D	0.80288	FALSE
42	C40	CER	0.33197	May	SCP2D1	4	D	-0.6363	FALSE
42	C40	SM	6.0777	May	SCP2D1	4	D	0.25734	FALSE
42	C40	HCER	1.30556	May	SCP2D1	4	D	0.185524	FALSE
42	C40	PG	0.897926	May	SCP2D1	4	D	0.603284	FALSE
42	C40	PE	19.5151	May	SCP2D1	4	D	-0.365975	FALSE
42	C40	FFA	11.1605	May	SCP2D1	4	D	2.29537	FALSE
42	C40	LCER	0.403068	May	SCP2D1	4	D	0.322759	FALSE
42	C40	PC	35.7515	May	SCP2D1	4	D	-0.906874	FALSE
42	C40	LPC	0.320309	May	SCP2D1	4	D	1.09377	FALSE
42	C40	PS	5.2854	May	SCP2D1	4	D	0.342884	FALSE
42	C40	PA	0.491955	May	SCP2D1	4	D	-1.7509	FALSE
43	C41	PC	35.717	May	HSD17B4	5	D	-0.92064	FALSE
43	C41	PG	0.868159	May	HSD17B4	5	D	0.312188	FALSE
43	C41	SM	5.61773	May	HSD17B4	5	D	-0.511867	FALSE
43	C41	LPE	0.163409	May	HSD17B4	5	D	0.307255	FALSE
43	C41	CE	2.55746	May	HSD17B4	5	D	-0.326887	FALSE
43	C41	DCER	0.047234	May	HSD17B4	5	D	-0.598551	FALSE
43	C41	HCER	1.18381	May	HSD17B4	5	D	-0.383371	FALSE
43	C41	PE	24.8189	May	HSD17B4	5	D	1.69251	FALSE
43	C41	PI	9.3773	May	HSD17B4	5	D	-0.122091	FALSE
43	C41	LCER	0.389043	May	HSD17B4	5	D	0.118284	FALSE
43	C41	DAG	2.53411	May	HSD17B4	5	D	0.693234	FALSE
43	C41	TAG	3.46429	May	HSD17B4	5	D	0.420481	FALSE
43	C41	CER	0.388743	May	HSD17B4	5	D	0.0298771	FALSE
43	C41	PS	4.44054	May	HSD17B4	5	D	-0.965911	FALSE
43	C41	PA	1.04931	May	HSD17B4	5	D	0.314324	FALSE
43	C41	LPC	0.252776	May	HSD17B4	5	D	-0.0908873	FALSE
43	C41	FFA	7.13018	May	HSD17B4	5	D	-1.10566	FALSE
44	C42	DAG	2.42306	May	STOML1	6	D	0.292032	FALSE
44	C42	PG	0.863736	May	STOML1	6	D	0.268932	FALSE
44	C42	PC	39.8312	May	STOML1	6	D	0.722252	FALSE
44	C42	SM	5.58644	May	STOML1	6	D	-0.564198	FALSE
44	C42	CER	0.329844	May	STOML1	6	D	-0.661245	FALSE
44	C42	LCER	0.407196	May	STOML1	6	D	0.382945	FALSE
44	C42	CE	2.40872	May	STOML1	6	D	-0.547101	FALSE
44	C42	HCER	1.15929	May	STOML1	6	D	-0.497966	FALSE
44	C42	PI	10.6315	May	STOML1	6	D	0.943917	FALSE
44	C42	PS	4.95767	May	STOML1	6	D	-0.164807	FALSE
44	C42	LPE	0.141348	May	STOML1	6	D	-0.384384	FALSE
44	C42	PE	18.0294	May	STOML1	6	D	-0.942604	FALSE
44	C42	FFA	8.42847	May	STOML1	6	D	-0.010074	FALSE
44	C42	DCER	0.0652082	May	STOML1	6	D	0.900506	FALSE
44	C42	TAG	3.55272	May	STOML1	6	D	0.539633	FALSE
44	C42	PA	0.924162	May	STOML1	6	D	-0.149386	FALSE
44	C42	LPC	0.25999	May	STOML1	6	D	0.0356565	FALSE
45	C43	PC	35.9369	May	HSDL2	7	D	-0.83285	FALSE
45	C43	CE	2.43693	May	HSDL2	7	D	-0.505337	FALSE
45	C43	TAG	3.28119	May	HSDL2	7	D	0.173766	FALSE
45	C43	PE	23.2786	May	HSDL2	7	D	1.09471	FALSE
45	C43	PI	9.25367	May	HSDL2	7	D	-0.227164	FALSE
45	C43	PG	0.789253	May	HSDL2	7	D	-0.459439	FALSE
45	C43	LPE	0.135356	May	HSDL2	7	D	-0.572214	FALSE
45	C43	LCER	0.482194	May	HSDL2	7	D	1.47641	FALSE
45	C43	DAG	2.2873	May	HSDL2	7	D	-0.198441	FALSE
45	C43	CER	0.366183	May	HSDL2	7	D	-0.234842	FALSE
45	C43	PS	4.91235	May	HSDL2	7	D	-0.235013	FALSE
45	C43	DCER	0.049901	May	HSDL2	7	D	-0.37612	FALSE
45	C43	HCER	1.22642	May	HSDL2	7	D	-0.184258	FALSE
45	C43	LPC	0.230786	May	HSDL2	7	D	-0.476643	FALSE
45	C43	PA	1.15194	May	HSDL2	7	D	0.694615	FALSE
45	C43	SM	5.84428	May	HSDL2	7	D	-0.133004	FALSE
45	C43	FFA	8.33674	May	HSDL2	7	D	-0.0874816	FALSE
46	C44	LPE	0.158084	May	CPTP	8	D	0.140322	FALSE
46	C44	CE	2.92016	May	CPTP	8	D	0.210072	FALSE
46	C44	PC	36.5503	May	CPTP	8	D	-0.587904	FALSE
46	C44	TAG	3.36265	May	CPTP	8	D	0.283533	FALSE
46	C44	PG	0.775858	May	CPTP	8	D	-0.590431	FALSE
46	C44	LPC	0.217925	May	CPTP	8	D	-0.702254	FALSE
46	C44	PA	1.33522	May	CPTP	8	D	1.37377	FALSE
46	C44	PI	9.26234	May	CPTP	8	D	-0.219794	FALSE
46	C44	LCER	0.442106	May	CPTP	8	D	0.891936	FALSE
46	C44	CER	0.409938	May	CPTP	8	D	0.278572	FALSE
46	C44	SM	6.61955	May	CPTP	8	D	1.16348	FALSE
46	C44	DAG	2.56815	May	CPTP	8	D	0.816223	FALSE
46	C44	PS	5.08662	May	CPTP	8	D	0.0349502	FALSE
46	C44	DCER	0.058615	May	CPTP	8	D	0.350628	FALSE
46	C44	PE	20.5655	May	CPTP	8	D	0.0417137	FALSE
46	C44	FFA	8.42746	May	CPTP	8	D	-0.0109306	FALSE
46	C44	HCER	1.23952	May	CPTP	8	D	-0.123045	FALSE
47	C45	PC	39.0294	May	GLTPD2	9	D	0.40207	FALSE
47	C45	LPE	0.163553	May	GLTPD2	9	D	0.311763	FALSE
47	C45	DAG	2.30713	May	GLTPD2	9	D	-0.126824	FALSE
47	C45	PI	10.1911	May	GLTPD2	9	D	0.569613	FALSE
47	C45	TAG	3.32338	May	GLTPD2	9	D	0.230624	FALSE
47	C45	PG	0.76474	May	GLTPD2	9	D	-0.69916	FALSE
47	C45	LCER	0.358941	May	GLTPD2	9	D	-0.320609	FALSE
47	C45	SM	5.55128	May	GLTPD2	9	D	-0.623005	FALSE
47	C45	CE	1.93171	May	GLTPD2	9	D	-1.2533	FALSE
47	C45	CER	0.286227	May	GLTPD2	9	D	-1.17304	FALSE
47	C45	PE	19.6942	May	GLTPD2	9	D	-0.296476	FALSE
47	C45	DCER	0.0518504	May	GLTPD2	9	D	-0.213541	FALSE
47	C45	HCER	1.10595	May	GLTPD2	9	D	-0.747201	FALSE
47	C45	PS	4.61759	May	GLTPD2	9	D	-0.691624	FALSE
47	C45	LPC	0.413728	May	GLTPD2	9	D	2.73253	FALSE
47	C45	FFA	9.61686	May	GLTPD2	9	D	0.992761	FALSE
47	C45	PA	0.59234	May	GLTPD2	9	D	-1.37893	FALSE
48	C46	PC	39.2603	May	GLTP	10	D	0.494271	FALSE
48	C46	LCER	0.399625	May	GLTP	10	D	0.272575	FALSE
48	C46	LPE	0.164955	May	GLTP	10	D	0.355724	FALSE
48	C46	CE	2.44608	May	GLTP	10	D	-0.491785	FALSE
48	C46	PI	9.16831	May	GLTP	10	D	-0.29971	FALSE
48	C46	DCER	0.0623431	May	GLTP	10	D	0.661559	FALSE
48	C46	TAG	3.40722	May	GLTP	10	D	0.34359	FALSE
48	C46	DAG	2.08512	May	GLTP	10	D	-0.928907	FALSE
48	C46	PS	4.72492	May	GLTP	10	D	-0.525368	FALSE
48	C46	SM	6.30374	May	GLTP	10	D	0.635347	FALSE
48	C46	PG	0.806243	May	GLTP	10	D	-0.293291	FALSE
48	C46	HCER	0.561283	May	GLTP	10	D	-3.2922	FALSE
48	C46	FFA	6.89525	May	GLTP	10	D	-1.3039	FALSE
48	C46	CER	0.338433	May	GLTP	10	D	-0.560456	FALSE
48	C46	PE	22.2742	May	GLTP	10	D	0.70486	FALSE
48	C46	PA	0.847935	May	GLTP	10	D	-0.431841	FALSE
48	C46	LPC	0.254055	May	GLTP	10	D	-0.0684501	FALSE
49	C47	PC	31.7485	May	PLEKHA8	11	D	-2.50536	FALSE
49	C47	TAG	5.98522	May	PLEKHA8	11	D	3.81717	FALSE
49	C47	LPE	0.250829	May	PLEKHA8	11	D	3.04791	FALSE
49	C47	CER	0.292345	May	PLEKHA8	11	D	-1.10125	FALSE
49	C47	PI	9.72871	May	PLEKHA8	11	D	0.176583	FALSE
49	C47	CE	1.93618	May	PLEKHA8	11	D	-1.24667	FALSE
49	C47	LCER	0.346098	May	PLEKHA8	11	D	-0.507859	FALSE
49	C47	DCER	0.0470647	May	PLEKHA8	11	D	-0.612673	FALSE
49	C47	DAG	1.97007	May	PLEKHA8	11	D	-1.34459	FALSE
49	C47	HCER	1.18322	May	PLEKHA8	11	D	-0.386116	FALSE
49	C47	PS	4.34576	May	PLEKHA8	11	D	-1.11273	FALSE
49	C47	PG	0.82501	May	PLEKHA8	11	D	-0.10977	FALSE
49	C47	PA	0.535481	May	PLEKHA8	11	D	-1.58962	FALSE
49	C47	FFA	9.6481	May	PLEKHA8	11	D	1.01912	FALSE
49	C47	SM	4.96607	May	PLEKHA8	11	D	-1.60165	FALSE
49	C47	PE	25.7917	May	PLEKHA8	11	D	2.07008	FALSE
49	C47	LPC	0.399595	May	PLEKHA8	11	D	2.48461	FALSE
50	C48	LPE	0.159848	May	SEC14L1	12	D	0.195604	FALSE
50	C48	PS	7.22534	May	SEC14L1	12	D	3.3481	FALSE
50	C48	PI	9.54503	May	SEC14L1	12	D	0.0204697	FALSE
50	C48	PG	0.989974	May	SEC14L1	12	D	1.50344	FALSE
50	C48	CER	0.469345	May	SEC14L1	12	D	0.975655	FALSE
50	C48	PC	36.4817	May	SEC14L1	12	D	-0.615279	FALSE
50	C48	DAG	1.89068	May	SEC14L1	12	D	-1.63144	FALSE
50	C48	SM	6.89763	May	SEC14L1	12	D	1.62853	FALSE
50	C48	CE	3.83302	May	SEC14L1	12	D	1.56152	FALSE
50	C48	FFA	9.52546	May	SEC14L1	12	D	0.915636	FALSE
50	C48	LCER	0.465234	May	SEC14L1	12	D	1.22915	FALSE
50	C48	TAG	2.47968	May	SEC14L1	12	D	-0.906173	FALSE
50	C48	HCER	1.60088	May	SEC14L1	12	D	1.56544	FALSE
50	C48	DCER	0.0480581	May	SEC14L1	12	D	-0.529818	FALSE
50	C48	PE	17.4446	May	SEC14L1	12	D	-1.16955	FALSE
50	C48	LPC	0.282497	May	SEC14L1	12	D	0.430474	FALSE
50	C48	PA	0.660954	May	SEC14L1	12	D	-1.12469	FALSE
51	C49	LPE	0.134055	May	SEC14L2	1	E	-0.613024	FALSE
51	C49	PS	6.1717	May	SEC14L2	1	E	1.71589	FALSE
51	C49	PI	11.8031	May	SEC14L2	1	E	1.93969	FALSE
51	C49	DCER	NA	May	SEC14L2	1	E	NA	FALSE
51	C49	PC	40.4045	May	SEC14L2	1	E	0.951159	FALSE
51	C49	PG	0.800429	May	SEC14L2	1	E	-0.350147	FALSE
51	C49	DAG	2.26268	May	SEC14L2	1	E	-0.287416	FALSE
51	C49	CE	3.0129	May	SEC14L2	1	E	0.347364	FALSE
51	C49	LPC	0.248288	May	SEC14L2	1	E	-0.169619	FALSE
51	C49	FFA	6.62225	May	SEC14L2	1	E	-1.53428	FALSE
51	C49	HCER	1.2822	May	SEC14L2	1	E	0.0763683	FALSE
51	C49	PA	1.11205	May	SEC14L2	1	E	0.546808	FALSE
51	C49	TAG	3.09936	May	SEC14L2	1	E	-0.0712274	FALSE
51	C49	PE	16.4538	May	SEC14L2	1	E	-1.55409	FALSE
51	C49	CER	0.397512	May	SEC14L2	1	E	0.132768	FALSE
51	C49	SM	5.79157	May	SEC14L2	1	E	-0.221159	FALSE
51	C49	LCER	0.403552	May	SEC14L2	1	E	0.329823	FALSE
52	C50	PC	40.2426	May	SEC14L3	2	E	0.886534	FALSE
52	C50	CE	2.70713	May	SEC14L3	2	E	-0.105319	FALSE
52	C50	LPE	0.139678	May	SEC14L3	2	E	-0.436734	FALSE
52	C50	PI	9.32435	May	SEC14L3	2	E	-0.16709	FALSE
52	C50	DCER	0.0700448	May	SEC14L3	2	E	1.30388	FALSE
52	C50	DAG	1.96487	May	SEC14L3	2	E	-1.36339	FALSE
52	C50	TAG	3.27132	May	SEC14L3	2	E	0.160474	FALSE
52	C50	PG	0.864148	May	SEC14L3	2	E	0.27297	FALSE
52	C50	FFA	8.24085	May	SEC14L3	2	E	-0.168404	FALSE
52	C50	PS	4.96514	May	SEC14L3	2	E	-0.153228	FALSE
52	C50	LCER	0.464647	May	SEC14L3	2	E	1.22058	FALSE
52	C50	PA	0.828567	May	SEC14L3	2	E	-0.503605	FALSE
52	C50	LPC	0.269309	May	SEC14L3	2	E	0.199134	FALSE
52	C50	SM	5.79105	May	SEC14L3	2	E	-0.222021	FALSE
52	C50	HCER	1.22061	May	SEC14L3	2	E	-0.211442	FALSE
52	C50	CER	0.393216	May	SEC14L3	2	E	0.082359	FALSE
52	C50	PE	19.2424	May	SEC14L3	2	E	-0.471799	FALSE
53	C51	PA	1.23361	May	SEC14L4	3	E	0.99726	FALSE
53	C51	PI	11.0536	May	SEC14L4	3	E	1.30266	FALSE
53	C51	LCER	0.456125	May	SEC14L4	3	E	1.09633	FALSE
53	C51	PC	38.269	May	SEC14L4	3	E	0.0984333	FALSE
53	C51	CE	3.19771	May	SEC14L4	3	E	0.620973	FALSE
53	C51	PE	19.6329	May	SEC14L4	3	E	-0.320243	FALSE
53	C51	PS	5.26927	May	SEC14L4	3	E	0.317896	FALSE
53	C51	DAG	1.99092	May	SEC14L4	3	E	-1.26927	FALSE
53	C51	DCER	0.04823	May	SEC14L4	3	E	-0.515486	FALSE
53	C51	LPE	0.108493	May	SEC14L4	3	E	-1.41439	FALSE
53	C51	CER	0.43329	May	SEC14L4	3	E	0.55259	FALSE
53	C51	LPC	0.249337	May	SEC14L4	3	E	-0.151218	FALSE
53	C51	TAG	2.96652	May	SEC14L4	3	E	-0.250217	FALSE
53	C51	FFA	7.08033	May	SEC14L4	3	E	-1.14772	FALSE
53	C51	HCER	1.22937	May	SEC14L4	3	E	-0.170498	FALSE
53	C51	SM	5.91485	May	SEC14L4	3	E	-0.014988	FALSE
53	C51	PG	0.866362	May	SEC14L4	3	E	0.294613	FALSE
54	C52	CE	3.1047	May	SEC14L5	4	E	0.483282	FALSE
54	C52	PI	9.31247	May	SEC14L5	4	E	-0.177184	FALSE
54	C52	CER	0.376976	May	SEC14L5	4	E	-0.1082	FALSE
54	C52	PC	38.3956	May	SEC14L5	4	E	0.148992	FALSE
54	C52	LCER	0.34965	May	SEC14L5	4	E	-0.456065	FALSE
54	C52	LPE	0.132446	May	SEC14L5	4	E	-0.663447	FALSE
54	C52	PS	4.36116	May	SEC14L5	4	E	-1.08887	FALSE
54	C52	PE	21.7013	May	SEC14L5	4	E	0.482537	FALSE
54	C52	DCER	0.0463489	May	SEC14L5	4	E	-0.672374	FALSE
54	C52	TAG	3.18765	May	SEC14L5	4	E	0.0477306	FALSE
54	C52	SM	6.15208	May	SEC14L5	4	E	0.381736	FALSE
54	C52	FFA	6.81956	May	SEC14L5	4	E	-1.36778	FALSE
54	C52	LPC	0.215869	May	SEC14L5	4	E	-0.73832	FALSE
54	C52	PG	0.798535	May	SEC14L5	4	E	-0.368671	FALSE
54	C52	DAG	2.8285	May	SEC14L5	4	E	1.75685	FALSE
54	C52	PA	1.09194	May	SEC14L5	4	E	0.472307	FALSE
54	C52	HCER	1.12512	May	SEC14L5	4	E	-0.657599	FALSE
55	C53	CE	2.8559	May	SEC14L6	5	E	0.11494	FALSE
55	C53	DCER	0.0640604	May	SEC14L6	5	E	0.804784	FALSE
55	C53	CER	0.354596	May	SEC14L6	5	E	-0.370805	FALSE
55	C53	PC	41.7041	May	SEC14L6	5	E	1.47014	FALSE
55	C53	PS	4.68902	May	SEC14L6	5	E	-0.58097	FALSE
55	C53	LCER	0.401238	May	SEC14L6	5	E	0.296078	FALSE
55	C53	PI	9.2758	May	SEC14L6	5	E	-0.208351	FALSE
55	C53	PG	0.760857	May	SEC14L6	5	E	-0.73713	FALSE
55	C53	LPE	0.149405	May	SEC14L6	5	E	-0.131769	FALSE
55	C53	PA	1.00884	May	SEC14L6	5	E	0.164399	FALSE
55	C53	TAG	3.59228	May	SEC14L6	5	E	0.592933	FALSE
55	C53	FFA	6.68043	May	SEC14L6	5	E	-1.48518	FALSE
55	C53	PE	18.9676	May	SEC14L6	5	E	-0.578464	FALSE
55	C53	DAG	2.50501	May	SEC14L6	5	E	0.588118	FALSE
55	C53	LPC	0.23062	May	SEC14L6	5	E	-0.479557	FALSE
55	C53	SM	5.63369	May	SEC14L6	5	E	-0.48519	FALSE
55	C53	HCER	1.12651	May	SEC14L6	5	E	-0.651103	FALSE
56	C54	PS	4.40814	May	MCF2L	6	E	-1.0161	FALSE
56	C54	FFA	7.60033	May	MCF2L	6	E	-0.708916	FALSE
56	C54	CE	2.59443	May	MCF2L	6	E	-0.272154	FALSE
56	C54	DCER	0.0695664	May	MCF2L	6	E	1.26399	FALSE
56	C54	TAG	2.87994	May	MCF2L	6	E	-0.366878	FALSE
56	C54	LPC	0.224349	May	MCF2L	6	E	-0.589569	FALSE
56	C54	LPE	0.125153	May	MCF2L	6	E	-0.892104	FALSE
56	C54	PI	8.22978	May	MCF2L	6	E	-1.09739	FALSE
56	C54	PC	41.5662	May	MCF2L	6	E	1.41507	FALSE
56	C54	LCER	0.431157	May	MCF2L	6	E	0.732302	FALSE
56	C54	PA	1.10178	May	MCF2L	6	E	0.508784	FALSE
56	C54	PE	20.3725	May	MCF2L	6	E	-0.0332062	FALSE
56	C54	PG	0.755465	May	MCF2L	6	E	-0.789856	FALSE
56	C54	DAG	2.56541	May	MCF2L	6	E	0.806334	FALSE
56	C54	SM	5.6309	May	MCF2L	6	E	-0.489844	FALSE
56	C54	HCER	1.08974	May	MCF2L	6	E	-0.822952	FALSE
56	C54	CER	0.355129	May	MCF2L	6	E	-0.364545	FALSE
57	C55	LPE	0.161496	May	MCF2	7	E	0.247295	FALSE
57	C55	PI	8.73102	May	MCF2	7	E	-0.671377	FALSE
57	C55	PS	4.93989	May	MCF2	7	E	-0.192352	FALSE
57	C55	LPC	0.236663	May	MCF2	7	E	-0.37355	FALSE
57	C55	FFA	9.98969	May	MCF2	7	E	1.30738	FALSE
57	C55	PA	1.10167	May	MCF2	7	E	0.508353	FALSE
57	C55	PC	37.9748	May	MCF2	7	E	-0.0190439	FALSE
57	C55	LCER	0.370453	May	MCF2	7	E	-0.152759	FALSE
57	C55	DCER	0.055275	May	MCF2	7	E	0.0720724	FALSE
57	C55	DAG	2.41576	May	MCF2	7	E	0.265654	FALSE
57	C55	PE	21.1437	May	MCF2	7	E	0.266124	FALSE
57	C55	SM	5.75707	May	MCF2	7	E	-0.278847	FALSE
57	C55	PG	0.823471	May	MCF2	7	E	-0.12482	FALSE
57	C55	CER	0.352663	May	MCF2	7	E	-0.393491	FALSE
57	C55	CE	2.21624	May	MCF2	7	E	-0.832059	FALSE
57	C55	HCER	1.13315	May	MCF2	7	E	-0.6201	FALSE
57	C55	TAG	2.59692	May	MCF2	7	E	-0.748211	FALSE
58	C56	PI	9.86273	May	RLBP1	8	E	0.290494	FALSE
58	C56	FFA	11.0915	May	RLBP1	8	E	2.23712	FALSE
58	C56	DCER	0.0622732	May	RLBP1	8	E	0.65573	FALSE
58	C56	PG	0.816701	May	RLBP1	8	E	-0.191024	FALSE
58	C56	PS	5.43436	May	RLBP1	8	E	0.573648	FALSE
58	C56	DAG	2.72984	May	RLBP1	8	E	1.40042	FALSE
58	C56	PE	19.2906	May	RLBP1	8	E	-0.453118	FALSE
58	C56	PC	36.5089	May	RLBP1	8	E	-0.604433	FALSE
58	C56	LPE	0.128202	May	RLBP1	8	E	-0.796515	FALSE
58	C56	TAG	2.00545	May	RLBP1	8	E	-1.54515	FALSE
58	C56	CE	2.80704	May	RLBP1	8	E	0.042603	FALSE
58	C56	SM	5.90558	May	RLBP1	8	E	-0.0304926	FALSE
58	C56	LPC	0.212306	May	RLBP1	8	E	-0.800819	FALSE
58	C56	HCER	1.24126	May	RLBP1	8	E	-0.114935	FALSE
58	C56	PA	1.10244	May	RLBP1	8	E	0.511213	FALSE
58	C56	LCER	0.401146	May	RLBP1	8	E	0.294748	FALSE
58	C56	CER	0.399755	May	RLBP1	8	E	0.159092	FALSE
59	C57	PI	8.92418	May	TTPA	9	E	-0.5072	FALSE
59	C57	PS	4.4985	May	TTPA	9	E	-0.876119	FALSE
59	C57	FFA	8.8044	May	TTPA	9	E	0.307151	FALSE
59	C57	DCER	0.053185	May	TTPA	9	E	-0.102233	FALSE
59	C57	LPE	0.170208	May	TTPA	9	E	0.520409	FALSE
59	C57	SM	5.85742	May	TTPA	9	E	-0.111035	FALSE
59	C57	PE	22.3415	May	TTPA	9	E	0.730981	FALSE
59	C57	DAG	2.8181	May	TTPA	9	E	1.7193	FALSE
59	C57	PC	35.0706	May	TTPA	9	E	-1.17878	FALSE
59	C57	HCER	1.30834	May	TTPA	9	E	0.198492	FALSE
59	C57	PG	0.709145	May	TTPA	9	E	-1.24283	FALSE
59	C57	CE	2.54342	May	TTPA	9	E	-0.347673	FALSE
59	C57	CER	0.373506	May	TTPA	9	E	-0.148911	FALSE
59	C57	PA	1.5125	May	TTPA	9	E	2.03065	FALSE
59	C57	LPC	0.223548	May	TTPA	9	E	-0.603619	FALSE
59	C57	LCER	0.366188	May	TTPA	9	E	-0.214948	FALSE
59	C57	TAG	4.42532	May	TTPA	9	E	1.71536	FALSE
61	C58	DCER	0.0739169	May	CLVS2	10	E	1.62682	FALSE
61	C58	PC	36.534	May	CLVS2	10	E	-0.594396	FALSE
61	C58	PA	1.06525	May	CLVS2	10	E	0.373423	FALSE
61	C58	PG	0.699609	May	CLVS2	10	E	-1.33608	FALSE
61	C58	CE	2.34149	May	CLVS2	10	E	-0.646634	FALSE
61	C58	PS	5.09755	May	CLVS2	10	E	0.0518808	FALSE
61	C58	HCER	1.29263	May	CLVS2	10	E	0.125117	FALSE
61	C58	LPE	0.151539	May	CLVS2	10	E	-0.0648859	FALSE
61	C58	FFA	9.91932	May	CLVS2	10	E	1.24799	FALSE
61	C58	SM	5.85687	May	CLVS2	10	E	-0.111951	FALSE
61	C58	TAG	3.24411	May	CLVS2	10	E	0.123812	FALSE
61	C58	PI	9.66472	May	CLVS2	10	E	0.122202	FALSE
61	C58	DAG	2.56172	May	CLVS2	10	E	0.79301	FALSE
61	C58	LPC	0.23217	May	CLVS2	10	E	-0.452362	FALSE
61	C58	LCER	0.346841	May	CLVS2	10	E	-0.497014	FALSE
61	C58	PE	20.5853	May	CLVS2	10	E	0.049398	FALSE
61	C58	CER	0.332909	May	CLVS2	10	E	-0.625281	FALSE
62	C59	DCER	0.0451651	May	CLVS1	11	E	-0.771099	FALSE
62	C59	CER	0.293146	May	CLVS1	11	E	-1.09186	FALSE
62	C59	PG	0.823745	May	CLVS1	11	E	-0.122137	FALSE
62	C59	FFA	8.64081	May	CLVS1	11	E	0.169106	FALSE
62	C59	LPE	0.151164	May	CLVS1	11	E	-0.0766259	FALSE
62	C59	PS	4.75095	May	CLVS1	11	E	-0.485046	FALSE
62	C59	LPC	0.226768	May	CLVS1	11	E	-0.547121	FALSE
62	C59	PE	20.7938	May	CLVS1	11	E	0.130327	FALSE
62	C59	PC	39.5942	May	CLVS1	11	E	0.627604	FALSE
62	C59	TAG	3.42385	May	CLVS1	11	E	0.365994	FALSE
62	C59	DAG	2.15697	May	CLVS1	11	E	-0.669341	FALSE
62	C59	HCER	1.16517	May	CLVS1	11	E	-0.470479	FALSE
62	C59	PI	8.51972	May	CLVS1	11	E	-0.850965	FALSE
62	C59	LCER	0.366179	May	CLVS1	11	E	-0.215071	FALSE
62	C59	CE	2.4481	May	CLVS1	11	E	-0.488798	FALSE
62	C59	PA	1.12184	May	CLVS1	11	E	0.583079	FALSE
62	C59	SM	5.47838	May	CLVS1	11	E	-0.744915	FALSE
63	C60	DAG	2.59958	May	TTPAL	12	E	0.929801	FALSE
63	C60	FFA	9.95826	May	TTPAL	12	E	1.28085	FALSE
63	C60	LPE	0.140784	May	TTPAL	12	E	-0.402057	FALSE
63	C60	CE	2.63565	May	TTPAL	12	E	-0.211129	FALSE
63	C60	PC	38.4347	May	TTPAL	12	E	0.164575	FALSE
63	C60	HCER	1.32996	May	TTPAL	12	E	0.299525	FALSE
63	C60	CER	0.326748	May	TTPAL	12	E	-0.697568	FALSE
63	C60	PI	8.79995	May	TTPAL	12	E	-0.612786	FALSE
63	C60	PG	0.766824	May	TTPAL	12	E	-0.678781	FALSE
63	C60	SM	5.96152	May	TTPAL	12	E	0.0630488	FALSE
63	C60	PS	5.65749	May	TTPAL	12	E	0.919312	FALSE
63	C60	DCER	0.0538428	May	TTPAL	12	E	-0.0473743	FALSE
63	C60	LPC	0.220664	May	TTPAL	12	E	-0.654198	FALSE
63	C60	PE	18.1462	May	TTPAL	12	E	-0.897277	FALSE
63	C60	LCER	0.31661	May	TTPAL	12	E	-0.937789	FALSE
63	C60	PA	1.19001	May	TTPAL	12	E	0.835698	FALSE
63	C60	TAG	3.46126	May	TTPAL	12	E	0.4164	FALSE
64	C61	LPE	0.151565	May	NF1	1	F	-0.0640491	FALSE
64	C61	DCER	0.0435765	May	NF1	1	F	-0.903591	FALSE
64	C61	LPC	0.260876	May	NF1	1	F	0.0511911	FALSE
64	C61	DAG	2.76668	May	NF1	1	F	1.53353	FALSE
64	C61	PS	4.93541	May	NF1	1	F	-0.199286	FALSE
64	C61	PG	0.73798	May	NF1	1	F	-0.960848	FALSE
64	C61	FFA	7.76886	May	NF1	1	F	-0.566696	FALSE
64	C61	PE	19.1804	May	NF1	1	F	-0.495855	FALSE
64	C61	HCER	1.23896	May	NF1	1	F	-0.125669	FALSE
64	C61	CER	0.345555	May	NF1	1	F	-0.476887	FALSE
64	C61	SM	6.2281	May	NF1	1	F	0.508864	FALSE
64	C61	PI	9.69448	May	NF1	1	F	0.147491	FALSE
64	C61	PA	1.23661	May	NF1	1	F	1.00836	FALSE
64	C61	PC	38.9097	May	NF1	1	F	0.354282	FALSE
64	C61	TAG	3.56971	May	NF1	1	F	0.562524	FALSE
64	C61	CE	2.64028	May	NF1	1	F	-0.204286	FALSE
64	C61	LCER	0.291154	May	NF1	1	F	-1.30894	FALSE
67	C64	LPE	0.205171	May	BNIP2	4	F	1.61651	FALSE
67	C64	HCER	1.23136	May	BNIP2	4	F	-0.161218	FALSE
67	C64	LPC	0.263067	May	BNIP2	4	F	0.0896362	FALSE
67	C64	DAG	2.07632	May	BNIP2	4	F	-0.960731	FALSE
67	C64	PG	0.790001	May	BNIP2	4	F	-0.452126	FALSE
67	C64	PA	0.889688	May	BNIP2	4	F	-0.277125	FALSE
67	C64	FFA	7.67816	May	BNIP2	4	F	-0.643235	FALSE
67	C64	CE	2.75156	May	BNIP2	4	F	-0.0395353	FALSE
67	C64	PC	36.844	May	BNIP2	4	F	-0.470625	FALSE
67	C64	PI	9.70627	May	BNIP2	4	F	0.157516	FALSE
67	C64	PS	5.31937	May	BNIP2	4	F	0.39551	FALSE
67	C64	SM	6.13831	May	BNIP2	4	F	0.358703	FALSE
67	C64	CER	0.354086	May	BNIP2	4	F	-0.376786	FALSE
67	C64	DCER	0.0535547	May	BNIP2	4	F	-0.0714029	FALSE
67	C64	PE	22.4025	May	BNIP2	4	F	0.754673	FALSE
67	C64	TAG	2.82944	May	BNIP2	4	F	-0.434916	FALSE
67	C64	LCER	0.467164	May	BNIP2	4	F	1.25728	FALSE
68	C65	LPE	0.170947	May	PRUNE2	5	F	0.543586	FALSE
68	C65	LPC	0.241129	May	PRUNE2	5	F	-0.295213	FALSE
68	C65	DAG	2.66071	May	PRUNE2	5	F	1.15065	FALSE
68	C65	HCER	1.23492	May	PRUNE2	5	F	-0.144548	FALSE
68	C65	PG	0.759696	May	PRUNE2	5	F	-0.748487	FALSE
68	C65	FFA	8.86876	May	PRUNE2	5	F	0.361466	FALSE
68	C65	DCER	0.0479964	May	PRUNE2	5	F	-0.534969	FALSE
68	C65	CE	2.61013	May	PRUNE2	5	F	-0.248918	FALSE
68	C65	PA	1.05874	May	PRUNE2	5	F	0.349271	FALSE
68	C65	PI	6.95221	May	PRUNE2	5	F	-2.18322	FALSE
68	C65	PC	40.1708	May	PRUNE2	5	F	0.857833	FALSE
68	C65	PS	3.60832	May	PRUNE2	5	F	-2.25512	FALSE
68	C65	CER	0.411333	May	PRUNE2	5	F	0.294949	FALSE
68	C65	SM	6.45882	May	PRUNE2	5	F	0.894691	FALSE
68	C65	TAG	2.36371	May	PRUNE2	5	F	-1.06244	FALSE
68	C65	PE	21.8971	May	PRUNE2	5	F	0.558498	FALSE
68	C65	LCER	0.48477	May	PRUNE2	5	F	1.51397	FALSE
70	C67	PI	10.027	May	GDAP2	7	F	0.430119	FALSE
70	C67	LPE	0.191089	May	GDAP2	7	F	1.17503	FALSE
70	C67	SM	6.79138	May	GDAP2	7	F	1.45083	FALSE
70	C67	LPC	0.202389	May	GDAP2	7	F	-0.974785	FALSE
70	C67	DCER	0.0577367	May	GDAP2	7	F	0.277381	FALSE
70	C67	PG	0.857618	May	GDAP2	7	F	0.209113	FALSE
70	C67	DAG	2.47908	May	GDAP2	7	F	0.494419	FALSE
70	C67	PA	0.976068	May	GDAP2	7	F	0.0429483	FALSE
70	C67	CER	0.436805	May	GDAP2	7	F	0.593829	FALSE
70	C67	PS	4.84236	May	GDAP2	7	F	-0.343436	FALSE
70	C67	FFA	7.66419	May	GDAP2	7	F	-0.655026	FALSE
70	C67	PE	20.4021	May	GDAP2	7	F	-0.0217062	FALSE
70	C67	HCER	1.1147	May	GDAP2	7	F	-0.706322	FALSE
70	C67	PC	37.352	May	GDAP2	7	F	-0.267743	FALSE
70	C67	CE	3.53054	May	GDAP2	7	F	1.11372	FALSE
70	C67	TAG	2.65438	May	GDAP2	7	F	-0.670794	FALSE
70	C67	LCER	0.420504	May	GDAP2	7	F	0.576979	FALSE
72	C68	CE	3.10754	May	SESTD1	8	F	0.487483	FALSE
72	C68	LPC	0.20526	May	SESTD1	8	F	-0.924413	FALSE
72	C68	CER	0.374097	May	SESTD1	8	F	-0.141977	FALSE
72	C68	PI	10.8272	May	SESTD1	8	F	1.11018	FALSE
72	C68	DAG	2.53658	May	SESTD1	8	F	0.702191	FALSE
72	C68	PE	22.0773	May	SESTD1	8	F	0.628438	FALSE
72	C68	PC	36.6542	May	SESTD1	8	F	-0.546402	FALSE
72	C68	PA	1.17432	May	SESTD1	8	F	0.777565	FALSE
72	C68	HCER	1.08153	May	SESTD1	8	F	-0.861287	FALSE
72	C68	DCER	0.0673614	May	SESTD1	8	F	1.08009	FALSE
72	C68	LPE	0.169374	May	SESTD1	8	F	0.494274	FALSE
72	C68	PG	0.722671	May	SESTD1	8	F	-1.11056	FALSE
72	C68	PS	4.87936	May	SESTD1	8	F	-0.286121	FALSE
72	C68	SM	5.63208	May	SESTD1	8	F	-0.487869	FALSE
72	C68	TAG	2.41108	May	SESTD1	8	F	-0.998617	FALSE
72	C68	LCER	0.366593	May	SESTD1	8	F	-0.209035	FALSE
72	C68	FFA	7.71352	May	SESTD1	8	F	-0.613394	FALSE
76	C71	CER	0.385837	May	PTPN9	11	F	-0.0042261	FALSE
76	C71	PI	12.1341	May	PTPN9	11	F	2.22099	FALSE
76	C71	DCER	0.064294	May	PTPN9	11	F	0.824265	FALSE
76	C71	PE	3.96354	May	PTPN9	11	F	-6.40176	FALSE
76	C71	FFA	9.10229	May	PTPN9	11	F	0.558535	FALSE
76	C71	PS	6.19546	May	PTPN9	11	F	1.75268	FALSE
76	C71	LPE	0.243377	May	PTPN9	11	F	2.8143	FALSE
76	C71	PA	1.38775	May	PTPN9	11	F	1.5684	FALSE
76	C71	HCER	1.43988	May	PTPN9	11	F	0.813147	FALSE
76	C71	PC	47.4611	May	PTPN9	11	F	3.76901	FALSE
76	C71	SM	6.56309	May	PTPN9	11	F	1.06907	FALSE
76	C71	DAG	2.45317	May	PTPN9	11	F	0.400834	FALSE
76	C71	LCER	0.38847	May	PTPN9	11	F	0.109926	FALSE
76	C71	PG	1.04496	May	PTPN9	11	F	2.04111	FALSE
76	C71	CE	2.67244	May	PTPN9	11	F	-0.156677	FALSE
76	C71	TAG	4.20126	May	PTPN9	11	F	1.41346	FALSE
76	C71	LPC	0.29901	May	PTPN9	11	F	0.720151	FALSE
77	C72	DCER	0.0581178	May	MOSPD2	12	F	0.309164	FALSE
77	C72	PE	19.9935	May	MOSPD2	12	F	-0.180308	FALSE
77	C72	SM	6.31293	May	MOSPD2	12	F	0.65072	FALSE
77	C72	PI	8.41093	May	MOSPD2	12	F	-0.943425	FALSE
77	C72	PS	4.39964	May	MOSPD2	12	F	-1.02927	FALSE
77	C72	CER	0.329116	May	MOSPD2	12	F	-0.66978	FALSE
77	C72	PC	41.1921	May	MOSPD2	12	F	1.26569	FALSE
77	C72	HCER	1.29732	May	MOSPD2	12	F	0.14701	FALSE
77	C72	FFA	7.07387	May	MOSPD2	12	F	-1.15317	FALSE
77	C72	LPE	0.231878	May	MOSPD2	12	F	2.4538	FALSE
77	C72	LCER	0.395389	May	MOSPD2	12	F	0.210806	FALSE
77	C72	DAG	2.26297	May	MOSPD2	12	F	-0.286372	FALSE
77	C72	CE	1.90935	May	MOSPD2	12	F	-1.28639	FALSE
77	C72	PA	1.14706	May	MOSPD2	12	F	0.676565	FALSE
77	C72	TAG	4.00031	May	MOSPD2	12	F	1.14271	FALSE
77	C72	PG	0.757189	May	MOSPD2	12	F	-0.772999	FALSE
77	C72	LPC	0.228317	May	MOSPD2	12	F	-0.519957	FALSE
78	C73	PS	5.35171	May	MCF2L2	1	G	0.445616	FALSE
78	C73	PE	20.2098	May	MCF2L2	1	G	-0.0963453	FALSE
78	C73	FFA	7.27695	May	MCF2L2	1	G	-0.981807	FALSE
78	C73	PI	9.73215	May	MCF2L2	1	G	0.179509	FALSE
78	C73	DCER	0.055684	May	MCF2L2	1	G	0.106179	FALSE
78	C73	PC	39.054	May	MCF2L2	1	G	0.411887	FALSE
78	C73	SM	5.7201	May	MCF2L2	1	G	-0.340678	FALSE
78	C73	HCER	1.17072	May	MCF2L2	1	G	-0.444529	FALSE
78	C73	PA	1.17607	May	MCF2L2	1	G	0.784026	FALSE
78	C73	CE	2.7559	May	MCF2L2	1	G	-0.0331149	FALSE
78	C73	LCER	0.321506	May	MCF2L2	1	G	-0.866402	FALSE
78	C73	PG	0.834533	May	MCF2L2	1	G	-0.0166383	FALSE
78	C73	DAG	2.3094	May	MCF2L2	1	G	-0.118613	FALSE
78	C73	CER	0.399735	May	MCF2L2	1	G	0.158855	FALSE
78	C73	LPE	0.155652	May	MCF2L2	1	G	0.0640683	FALSE
78	C73	TAG	3.25191	May	MCF2L2	1	G	0.134324	FALSE
78	C73	LPC	0.224167	May	MCF2L2	1	G	-0.592752	FALSE
81	C76	FFA	6.6719	May	PDZD8	4	G	-1.49238	FALSE
81	C76	PS	5.65248	May	PDZD8	4	G	0.911543	FALSE
81	C76	LPE	0.143641	May	PDZD8	4	G	-0.312489	FALSE
81	C76	CE	3.8844	May	PDZD8	4	G	1.63759	FALSE
81	C76	PA	0.949033	May	PDZD8	4	G	-0.0572281	FALSE
81	C76	SM	5.62688	May	PDZD8	4	G	-0.496569	FALSE
81	C76	DAG	2.45461	May	PDZD8	4	G	0.40603	FALSE
81	C76	PG	0.809584	May	PDZD8	4	G	-0.260623	FALSE
81	C76	HCER	1.48428	May	PDZD8	4	G	1.02058	FALSE
81	C76	PC	40.3531	May	PDZD8	4	G	0.930629	FALSE
81	C76	TAG	2.60781	May	PDZD8	4	G	-0.733541	FALSE
81	C76	CER	0.531055	May	PDZD8	4	G	1.69975	FALSE
81	C76	DCER	0.0772571	May	PDZD8	4	G	1.9054	FALSE
81	C76	LPC	0.195891	May	PDZD8	4	G	-1.08878	FALSE
81	C76	PI	8.74235	May	PDZD8	4	G	-0.661746	FALSE
81	C76	PE	19.3548	May	PDZD8	4	G	-0.428205	FALSE
81	C76	LCER	0.461021	May	PDZD8	4	G	1.16772	FALSE
83	C78	FFA	8.64838	May	ESYT3	6	G	0.1755	FALSE
83	C78	PC	38.5264	May	ESYT3	6	G	0.201208	FALSE
83	C78	LPC	0.225188	May	ESYT3	6	G	-0.57484	FALSE
83	C78	PS	4.17766	May	ESYT3	6	G	-1.37314	FALSE
83	C78	SM	5.77907	May	ESYT3	6	G	-0.242068	FALSE
83	C78	DCER	0.0426319	May	ESYT3	6	G	-0.982367	FALSE
83	C78	PA	1.04546	May	ESYT3	6	G	0.300066	FALSE
83	C78	HCER	1.15795	May	ESYT3	6	G	-0.504218	FALSE
83	C78	PI	9.02188	May	ESYT3	6	G	-0.424169	FALSE
83	C78	CE	2.14809	May	ESYT3	6	G	-0.932955	FALSE
83	C78	LPE	0.203877	May	ESYT3	6	G	1.57595	FALSE
83	C78	PE	21.4959	May	ESYT3	6	G	0.402811	FALSE
83	C78	CER	0.368204	May	ESYT3	6	G	-0.211135	FALSE
83	C78	TAG	3.86348	May	ESYT3	6	G	0.958346	FALSE
83	C78	PG	0.834511	May	ESYT3	6	G	-0.0168553	FALSE
83	C78	DAG	2.0325	May	ESYT3	6	G	-1.11904	FALSE
83	C78	LCER	0.428799	May	ESYT3	6	G	0.697921	FALSE
84	C79	CE	3.06263	May	ESYT1	7	G	0.420987	FALSE
84	C79	PS	5.93126	May	ESYT1	7	G	1.3434	FALSE
84	C79	FFA	8.44033	May	ESYT1	7	G	-6.61746e-05	FALSE
84	C79	PC	35.2934	May	ESYT1	7	G	-1.08981	FALSE
84	C79	LPC	0.219185	May	ESYT1	7	G	-0.680141	FALSE
84	C79	LPE	0.136631	May	ESYT1	7	G	-0.532265	FALSE
84	C79	PA	1.15435	May	ESYT1	7	G	0.703556	FALSE
84	C79	DCER	0.0528182	May	ESYT1	7	G	-0.132828	FALSE
84	C79	SM	6.52217	May	ESYT1	7	G	1.00064	FALSE
84	C79	HCER	1.1563	May	ESYT1	7	G	-0.511925	FALSE
84	C79	PI	9.73495	May	ESYT1	7	G	0.18189	FALSE
84	C79	CER	0.464206	May	ESYT1	7	G	0.915355	FALSE
84	C79	PE	21.8325	May	ESYT1	7	G	0.533461	FALSE
84	C79	TAG	1.85853	May	ESYT1	7	G	-1.74312	FALSE
84	C79	DAG	2.7759	May	ESYT1	7	G	1.56683	FALSE
84	C79	LCER	0.409396	May	ESYT1	7	G	0.415029	FALSE
84	C79	PG	0.955422	May	ESYT1	7	G	1.16555	FALSE
85	C80	FFA	8.98502	May	TEX2	8	G	0.459576	FALSE
85	C80	DCER	0.0793539	May	TEX2	8	G	2.08027	FALSE
85	C80	PS	5.85254	May	TEX2	8	G	1.22146	FALSE
85	C80	SM	6.08238	May	TEX2	8	G	0.265175	FALSE
85	C80	PC	36.7174	May	TEX2	8	G	-0.521187	FALSE
85	C80	PA	1.10187	May	TEX2	8	G	0.509108	FALSE
85	C80	PI	9.55361	May	TEX2	8	G	0.0277655	FALSE
85	C80	LPC	0.188168	May	TEX2	8	G	-1.22424	FALSE
85	C80	HCER	1.09897	May	TEX2	8	G	-0.779788	FALSE
85	C80	CE	3.84924	May	TEX2	8	G	1.58555	FALSE
85	C80	LPE	0.12435	May	TEX2	8	G	-0.917282	FALSE
85	C80	CER	0.495708	May	TEX2	8	G	1.28499	FALSE
85	C80	TAG	1.74819	May	TEX2	8	G	-1.89178	FALSE
85	C80	PE	20.1602	May	TEX2	8	G	-0.115607	FALSE
85	C80	DAG	2.81098	May	TEX2	8	G	1.69358	FALSE
85	C80	LCER	0.432752	May	TEX2	8	G	0.755564	FALSE
85	C80	PG	0.719314	May	TEX2	8	G	-1.14338	FALSE
86	C81	FFA	8.90496	May	C2CD2L	9	G	0.392014	FALSE
86	C81	PA	1.08778	May	C2CD2L	9	G	0.456884	FALSE
86	C81	DCER	0.0514412	May	C2CD2L	9	G	-0.247672	FALSE
86	C81	PI	8.21307	May	C2CD2L	9	G	-1.11159	FALSE
86	C81	SM	6.82939	May	C2CD2L	9	G	1.5144	FALSE
86	C81	PS	5.4344	May	C2CD2L	9	G	0.573714	FALSE
86	C81	LPE	0.185089	May	C2CD2L	9	G	0.986941	FALSE
86	C81	HCER	1.23455	May	C2CD2L	9	G	-0.146311	FALSE
86	C81	PC	37.1063	May	C2CD2L	9	G	-0.365883	FALSE
86	C81	CE	3.47605	May	C2CD2L	9	G	1.03305	FALSE
86	C81	PE	21.4738	May	C2CD2L	9	G	0.394247	FALSE
86	C81	LPC	0.20959	May	C2CD2L	9	G	-0.848457	FALSE
86	C81	LCER	0.440822	May	C2CD2L	9	G	0.873221	FALSE
86	C81	TAG	2.19529	May	C2CD2L	9	G	-1.28936	FALSE
86	C81	PG	0.819837	May	C2CD2L	9	G	-0.160355	FALSE
86	C81	CER	0.47483	May	C2CD2L	9	G	1.04002	FALSE
86	C81	DAG	1.86278	May	C2CD2L	9	G	-1.73224	FALSE
87	C82	FFA	8.85997	May	C2CD2	10	G	0.354053	FALSE
87	C82	PI	10.1466	May	C2CD2	10	G	0.531764	FALSE
87	C82	CER	0.412982	May	C2CD2	10	G	0.314294	FALSE
87	C82	PA	1.27412	May	C2CD2	10	G	1.14737	FALSE
87	C82	PC	37.5597	May	C2CD2	10	G	-0.184837	FALSE
87	C82	PS	5.33626	May	C2CD2	10	G	0.421677	FALSE
87	C82	SM	6.26551	May	C2CD2	10	G	0.571417	FALSE
87	C82	DCER	0.050121	May	C2CD2	10	G	-0.357777	FALSE
87	C82	LPE	0.156135	May	C2CD2	10	G	0.0792151	FALSE
87	C82	LPC	0.228708	May	C2CD2	10	G	-0.513089	FALSE
87	C82	HCER	1.16252	May	C2CD2	10	G	-0.482842	FALSE
87	C82	CE	2.7514	May	C2CD2	10	G	-0.0397728	FALSE
87	C82	TAG	2.11265	May	C2CD2	10	G	-1.40071	FALSE
87	C82	LCER	0.454199	May	C2CD2	10	G	1.06826	FALSE
87	C82	DAG	2.36694	May	C2CD2	10	G	0.0892586	FALSE
87	C82	PE	19.9534	May	C2CD2	10	G	-0.195856	FALSE
87	C82	PG	0.908801	May	C2CD2	10	G	0.709631	FALSE
88	C83	PS	6.69343	May	GRAMD1A	11	G	2.5241	FALSE
88	C83	HCER	1.41043	May	GRAMD1A	11	G	0.675511	FALSE
88	C83	FFA	8.82192	May	GRAMD1A	11	G	0.321937	FALSE
88	C83	SM	6.50211	May	GRAMD1A	11	G	0.967097	FALSE
88	C83	DCER	0.0730303	May	GRAMD1A	11	G	1.55288	FALSE
88	C83	LPE	0.195392	May	GRAMD1A	11	G	1.30993	FALSE
88	C83	PC	35.1153	May	GRAMD1A	11	G	-1.16093	FALSE
88	C83	TAG	2.25411	May	GRAMD1A	11	G	-1.21011	FALSE
88	C83	CER	0.507155	May	GRAMD1A	11	G	1.41931	FALSE
88	C83	PI	9.49671	May	GRAMD1A	11	G	-0.0205999	FALSE
88	C83	CE	3.42401	May	GRAMD1A	11	G	0.956007	FALSE
88	C83	PA	1.1941	May	GRAMD1A	11	G	0.850864	FALSE
88	C83	PE	20.064	May	GRAMD1A	11	G	-0.152945	FALSE
88	C83	LPC	0.243983	May	GRAMD1A	11	G	-0.245136	FALSE
88	C83	DAG	2.64594	May	GRAMD1A	11	G	1.0973	FALSE
88	C83	LCER	0.435209	May	GRAMD1A	11	G	0.791374	FALSE
88	C83	PG	0.923229	May	GRAMD1A	11	G	0.850725	FALSE
89	C84	FFA	7.52392	May	GRAMD1B	12	G	-0.773396	FALSE
89	C84	SM	6.32364	May	GRAMD1B	12	G	0.668638	FALSE
89	C84	HCER	1.36128	May	GRAMD1B	12	G	0.445854	FALSE
89	C84	LCER	0.391795	May	GRAMD1B	12	G	0.158411	FALSE
89	C84	PE	20.2587	May	GRAMD1B	12	G	-0.077388	FALSE
89	C84	PS	4.93024	May	GRAMD1B	12	G	-0.207294	FALSE
89	C84	TAG	2.40873	May	GRAMD1B	12	G	-1.00178	FALSE
89	C84	PA	1.01929	May	GRAMD1B	12	G	0.203116	FALSE
89	C84	CE	3.13335	May	GRAMD1B	12	G	0.525691	FALSE
89	C84	PC	39.5965	May	GRAMD1B	12	G	0.628514	FALSE
89	C84	LPE	0.165159	May	GRAMD1B	12	G	0.362118	FALSE
89	C84	CER	0.444118	May	GRAMD1B	12	G	0.679639	FALSE
89	C84	PI	8.99393	May	GRAMD1B	12	G	-0.44792	FALSE
89	C84	LPC	0.207634	May	GRAMD1B	12	G	-0.882778	FALSE
89	C84	DCER	0.0699276	May	GRAMD1B	12	G	1.29411	FALSE
89	C84	DAG	2.38204	May	GRAMD1B	12	G	0.143817	FALSE
89	C84	PG	0.789802	May	GRAMD1B	12	G	-0.454069	FALSE
93	C88	CER	0.415753	May	VPS13C	4	H	0.346811	FALSE
93	C88	PC	38.6241	May	VPS13C	4	H	0.240231	FALSE
93	C88	DAG	2.57583	May	VPS13C	4	H	0.843972	FALSE
93	C88	PE	19.8452	May	VPS13C	4	H	-0.237843	FALSE
93	C88	SM	6.07321	May	VPS13C	4	H	0.249834	FALSE
93	C88	PA	0.955627	May	VPS13C	4	H	-0.0327935	FALSE
93	C88	LPC	0.186715	May	VPS13C	4	H	-1.24973	FALSE
93	C88	HCER	1.25974	May	VPS13C	4	H	-0.0285987	FALSE
93	C88	FFA	7.30944	May	VPS13C	4	H	-0.95439	FALSE
93	C88	CE	3.31338	May	VPS13C	4	H	0.792221	FALSE
93	C88	PI	9.53153	May	VPS13C	4	H	0.00900031	FALSE
93	C88	LCER	0.401186	May	VPS13C	4	H	0.29532	FALSE
93	C88	PS	5.57025	May	VPS13C	4	H	0.784151	FALSE
93	C88	TAG	2.97013	May	VPS13C	4	H	-0.24535	FALSE
93	C88	DCER	0.0587041	May	VPS13C	4	H	0.358062	FALSE
93	C88	PG	0.80776	May	VPS13C	4	H	-0.278456	FALSE
93	C88	LPE	0.101386	May	VPS13C	4	H	-1.63722	FALSE
96	C90	DAG	2.03583	May	COL4A3BP	6	H	-1.107	FALSE
96	C90	LPE	0.15707	May	COL4A3BP	6	H	0.108527	FALSE
96	C90	PG	0.887476	May	COL4A3BP	6	H	0.501089	FALSE
96	C90	SM	3.49836	May	COL4A3BP	6	H	-4.05614	FALSE
96	C90	HCER	1.69779	May	COL4A3BP	6	H	2.01825	FALSE
96	C90	PA	1.25993	May	COL4A3BP	6	H	1.09477	FALSE
96	C90	FFA	8.74695	May	COL4A3BP	6	H	0.258678	FALSE
96	C90	CER	0.448416	May	COL4A3BP	6	H	0.730073	FALSE
96	C90	PE	20.2374	May	COL4A3BP	6	H	-0.0856508	FALSE
96	C90	DCER	0.0868611	May	COL4A3BP	6	H	2.70637	FALSE
96	C90	PS	4.8665	May	COL4A3BP	6	H	-0.306042	FALSE
96	C90	PC	39.2658	May	COL4A3BP	6	H	0.496468	FALSE
96	C90	CE	2.69469	May	COL4A3BP	6	H	-0.123733	FALSE
96	C90	LCER	0.323402	May	COL4A3BP	6	H	-0.838764	FALSE
96	C90	LPC	0.27942	May	COL4A3BP	6	H	0.376499	FALSE
96	C90	TAG	4.0418	May	COL4A3BP	6	H	1.19861	FALSE
96	C90	PI	9.47233	May	COL4A3BP	6	H	-0.0413159	FALSE
99	C92	SM	5.47165	May	NonTarget_2	8	H	-0.756174	TRUE
99	C92	FFA	10.4672	May	NonTarget_2	8	H	1.71033	TRUE
99	C92	HCER	1.13457	May	NonTarget_2	8	H	-0.613466	TRUE
99	C92	PS	5.43506	May	NonTarget_2	8	H	0.574728	TRUE
99	C92	DAG	2.50314	May	NonTarget_2	8	H	0.58136	TRUE
99	C92	DCER	0.0609706	May	NonTarget_2	8	H	0.547094	TRUE
99	C92	LCER	0.334876	May	NonTarget_2	8	H	-0.671475	TRUE
99	C92	PG	0.773512	May	NonTarget_2	8	H	-0.613373	TRUE
99	C92	CER	0.336129	May	NonTarget_2	8	H	-0.587492	TRUE
99	C92	PI	9.88128	May	NonTarget_2	8	H	0.30626	TRUE
99	C92	TAG	2.91535	May	NonTarget_2	8	H	-0.319162	TRUE
99	C92	PA	0.922511	May	NonTarget_2	8	H	-0.155504	TRUE
99	C92	PE	20.666	May	NonTarget_2	8	H	0.0807023	TRUE
99	C92	PC	36.0625	May	NonTarget_2	8	H	-0.782666	TRUE
99	C92	LPE	0.107417	May	NonTarget_2	8	H	-1.44812	TRUE
99	C92	LPC	0.241535	May	NonTarget_2	8	H	-0.288081	TRUE
99	C92	CE	2.68628	May	NonTarget_2	8	H	-0.136178	TRUE
102	C93	SM	5.54038	May	NonTarget_3	9	H	-0.641228	TRUE
102	C93	CER	0.348053	May	NonTarget_3	9	H	-0.447574	TRUE
102	C93	DAG	2.27069	May	NonTarget_3	9	H	-0.258476	TRUE
102	C93	CE	2.87865	May	NonTarget_3	9	H	0.148616	TRUE
102	C93	FFA	9.11762	May	NonTarget_3	9	H	0.57147	TRUE
102	C93	PS	5.37401	May	NonTarget_3	9	H	0.480156	TRUE
102	C93	PE	20.3374	May	NonTarget_3	9	H	-0.0468171	TRUE
102	C93	HCER	1.1055	May	NonTarget_3	9	H	-0.749274	TRUE
102	C93	PC	38.628	May	NonTarget_3	9	H	0.241784	TRUE
102	C93	PG	0.782301	May	NonTarget_3	9	H	-0.527425	TRUE
102	C93	PA	0.945636	May	NonTarget_3	9	H	-0.0698149	TRUE
102	C93	LPC	0.238961	May	NonTarget_3	9	H	-0.333244	TRUE
102	C93	LCER	0.352592	May	NonTarget_3	9	H	-0.413164	TRUE
102	C93	PI	9.24411	May	NonTarget_3	9	H	-0.235289	TRUE
102	C93	TAG	2.67267	May	NonTarget_3	9	H	-0.646143	TRUE
102	C93	DCER	0.0489514	May	NonTarget_3	9	H	-0.45532	TRUE
102	C93	LPE	0.114429	May	NonTarget_3	9	H	-1.22831	TRUE
104	C94	SM	5.37664	May	NonTarget_4	10	H	-0.915058	TRUE
104	C94	PS	4.84745	May	NonTarget_4	10	H	-0.335544	TRUE
104	C94	HCER	1.11046	May	NonTarget_4	10	H	-0.726129	TRUE
104	C94	FFA	9.22922	May	NonTarget_4	10	H	0.665645	TRUE
104	C94	DAG	2.41762	May	NonTarget_4	10	H	0.272365	TRUE
104	C94	CER	0.320926	May	NonTarget_4	10	H	-0.765887	TRUE
104	C94	CE	2.42172	May	NonTarget_4	10	H	-0.527854	TRUE
104	C94	PE	20.2012	May	NonTarget_4	10	H	-0.0997043	TRUE
104	C94	DCER	0.0530869	May	NonTarget_4	10	H	-0.11042	TRUE
104	C94	PI	10.5958	May	NonTarget_4	10	H	0.913517	TRUE
104	C94	PC	37.5629	May	NonTarget_4	10	H	-0.183563	TRUE
104	C94	PG	0.743774	May	NonTarget_4	10	H	-0.904187	TRUE
104	C94	LCER	0.354975	May	NonTarget_4	10	H	-0.378424	TRUE
104	C94	PA	1.0232	May	NonTarget_4	10	H	0.217586	TRUE
104	C94	LPE	0.119185	May	NonTarget_4	10	H	-1.07919	TRUE
104	C94	LPC	0.232195	May	NonTarget_4	10	H	-0.451918	TRUE
104	C94	TAG	3.38978	May	NonTarget_4	10	H	0.32009	TRUE
107	C95	PS	4.8545	May	NonTarget_5	11	H	-0.324632	TRUE
107	C95	DCER	0.0641643	May	NonTarget_5	11	H	0.813446	TRUE
107	C95	PI	11.7938	May	NonTarget_5	11	H	1.93174	TRUE
107	C95	SM	5.82155	May	NonTarget_5	11	H	-0.171027	TRUE
107	C95	HCER	1.15665	May	NonTarget_5	11	H	-0.510264	TRUE
107	C95	CER	0.322209	May	NonTarget_5	11	H	-0.750831	TRUE
107	C95	FFA	7.97925	May	NonTarget_5	11	H	-0.389158	TRUE
107	C95	PC	32.8419	May	NonTarget_5	11	H	-2.06873	TRUE
107	C95	TAG	4.79092	May	NonTarget_5	11	H	2.20797	TRUE
107	C95	LCER	0.305252	May	NonTarget_5	11	H	-1.10338	TRUE
107	C95	LPE	0.112366	May	NonTarget_5	11	H	-1.29298	TRUE
107	C95	PG	0.711378	May	NonTarget_5	11	H	-1.22099	TRUE
107	C95	CE	2.75559	May	NonTarget_5	11	H	-0.0335651	TRUE
107	C95	DAG	2.74673	May	NonTarget_5	11	H	1.46145	TRUE
107	C95	PE	22.3088	May	NonTarget_5	11	H	0.718296	TRUE
107	C95	LPC	0.219338	May	NonTarget_5	11	H	-0.677465	TRUE
107	C95	PA	1.2156	May	NonTarget_5	11	H	0.930528	TRUE
1	E01	CE	4.5009	May	OSBP	1	A	2.3361	FALSE
1	E01	PG	0.890323	May	OSBP	1	A	1.3141	FALSE
1	E01	PS	5.3602	May	OSBP	1	A	1.46747	FALSE
1	E01	SM	4.58418	May	OSBP	1	A	-2.23583	FALSE
1	E01	TAG	2.32163	May	OSBP	1	A	-1.36346	FALSE
1	E01	LCER	0.816013	May	OSBP	1	A	2.7048	FALSE
1	E01	PA	0.63578	May	OSBP	1	A	0.638429	FALSE
1	E01	PC	32.7802	May	OSBP	1	A	-1.285	FALSE
1	E01	PI	9.15142	May	OSBP	1	A	-0.606722	FALSE
1	E01	HCER	1.12831	May	OSBP	1	A	-1.09137	FALSE
1	E01	LPC	0.187954	May	OSBP	1	A	1.69108	FALSE
1	E01	LPE	0.0999718	May	OSBP	1	A	-1.1747	FALSE
1	E01	PE	17.3798	May	OSBP	1	A	-1.55994	FALSE
1	E01	DAG	2.82481	May	OSBP	1	A	0.963599	FALSE
1	E01	DCER	0.0784421	May	OSBP	1	A	0.412251	FALSE
1	E01	CER	0.637894	May	OSBP	1	A	2.48826	FALSE
1	E01	FFA	16.6222	May	OSBP	1	A	2.74944	FALSE
12	E12	DCER	0.059007	May	OSBPL11	12	A	-0.804504	FALSE
12	E12	PA	0.577103	May	OSBPL11	12	A	0.0883846	FALSE
12	E12	LCER	0.259728	May	OSBPL11	12	A	-0.920431	FALSE
12	E12	LPC	0.127996	May	OSBPL11	12	A	-1.81463	FALSE
12	E12	TAG	5.57284	May	OSBPL11	12	A	0.955028	FALSE
12	E12	PS	3.85662	May	OSBPL11	12	A	-2.04149	FALSE
12	E12	PE	21.5697	May	OSBPL11	12	A	-0.171044	FALSE
12	E12	DAG	2.15558	May	OSBPL11	12	A	-0.583388	FALSE
12	E12	PC	36.248	May	OSBPL11	12	A	0.196512	FALSE
12	E12	CE	2.70464	May	OSBPL11	12	A	-0.0875502	FALSE
12	E12	SM	4.68616	May	OSBPL11	12	A	-2.00567	FALSE
12	E12	FFA	9.39204	May	OSBPL11	12	A	0.112358	FALSE
12	E12	PG	0.704394	May	OSBPL11	12	A	-0.737135	FALSE
12	E12	CER	0.406175	May	OSBPL11	12	A	-0.230115	FALSE
12	E12	HCER	1.62105	May	OSBPL11	12	A	2.20216	FALSE
12	E12	LPE	0.0857829	May	OSBPL11	12	A	-1.58137	FALSE
12	E12	PI	9.97315	May	OSBPL11	12	A	0.840851	FALSE
13	E13	CE	2.58805	May	STAR	1	B	-0.244857	FALSE
13	E13	DCER	0.0868101	May	STAR	1	B	0.936137	FALSE
13	E13	PI	10.0129	May	STAR	1	B	0.910874	FALSE
13	E13	PA	0.493501	May	STAR	1	B	-0.695314	FALSE
13	E13	CER	0.401245	May	STAR	1	B	-0.287956	FALSE
13	E13	TAG	3.86874	May	STAR	1	B	-0.260192	FALSE
13	E13	DAG	2.04013	May	STAR	1	B	-0.850258	FALSE
13	E13	PS	4.28832	May	STAR	1	B	-1.03402	FALSE
13	E13	LCER	0.391725	May	STAR	1	B	-0.0602242	FALSE
13	E13	LPC	0.167342	May	STAR	1	B	0.485868	FALSE
13	E13	PC	37.9437	May	STAR	1	B	0.920926	FALSE
13	E13	FFA	8.67022	May	STAR	1	B	-0.150919	FALSE
13	E13	PG	0.656896	May	STAR	1	B	-1.26115	FALSE
13	E13	HCER	1.31787	May	STAR	1	B	0.175669	FALSE
13	E13	LPE	0.125665	May	STAR	1	B	-0.438318	FALSE
13	E13	PE	21.4075	May	STAR	1	B	-0.224828	FALSE
13	E13	SM	5.53945	May	STAR	1	B	-0.0799651	FALSE
14	E14	LPC	0.153601	May	PCTP	2	B	-0.317517	FALSE
14	E14	PS	4.56513	May	PCTP	2	B	-0.387993	FALSE
14	E14	FFA	8.72792	May	PCTP	2	B	-0.12987	FALSE
14	E14	DAG	2.59321	May	PCTP	2	B	0.428232	FALSE
14	E14	PA	0.519708	May	PCTP	2	B	-0.449645	FALSE
14	E14	PI	9.70361	May	PCTP	2	B	0.366022	FALSE
14	E14	PE	21.7708	May	PCTP	2	B	-0.1044	FALSE
14	E14	TAG	3.83881	May	PCTP	2	B	-0.281531	FALSE
14	E14	PG	0.7294	May	PCTP	2	B	-0.46126	FALSE
14	E14	CE	2.42236	May	PCTP	2	B	-0.468418	FALSE
14	E14	DCER	0.0890821	May	PCTP	2	B	1.07838	FALSE
14	E14	LCER	0.379093	May	PCTP	2	B	-0.142549	FALSE
14	E14	HCER	1.1431	May	PCTP	2	B	-0.992503	FALSE
14	E14	PC	37.0065	May	PCTP	2	B	0.520562	FALSE
14	E14	CER	0.372256	May	PCTP	2	B	-0.628031	FALSE
14	E14	SM	5.83125	May	PCTP	2	B	0.578549	FALSE
14	E14	LPE	0.154165	May	PCTP	2	B	0.378532	FALSE
65	E62	DCER	0.0595372	May	ARHGAP8	2	F	-0.771312	FALSE
65	E62	LPE	0.122288	May	ARHGAP8	2	F	-0.535103	FALSE
65	E62	PS	5.45233	May	ARHGAP8	2	F	1.68249	FALSE
65	E62	PG	0.864545	May	ARHGAP8	2	F	1.02971	FALSE
65	E62	DAG	3.09413	May	ARHGAP8	2	F	1.58615	FALSE
65	E62	SM	5.23773	May	ARHGAP8	2	F	-0.7609	FALSE
65	E62	FFA	17.3241	May	ARHGAP8	2	F	3.00547	FALSE
65	E62	CE	4.87844	May	ARHGAP8	2	F	2.84549	FALSE
65	E62	PC	33.492	May	ARHGAP8	2	F	-0.980891	FALSE
65	E62	PI	9.00705	May	ARHGAP8	2	F	-0.861041	FALSE
65	E62	TAG	2.23655	May	ARHGAP8	2	F	-1.42413	FALSE
65	E62	LPC	0.190436	May	ARHGAP8	2	F	1.83619	FALSE
65	E62	CER	0.613463	May	ARHGAP8	2	F	2.20165	FALSE
65	E62	HCER	1.20024	May	ARHGAP8	2	F	-0.6106	FALSE
65	E62	PE	14.505	May	ARHGAP8	2	F	-2.51292	FALSE
65	E62	LCER	0.845146	May	ARHGAP8	2	F	2.89465	FALSE
65	E62	PA	0.877	May	ARHGAP8	2	F	2.89965	FALSE
66	E63	PS	4.67401	May	ARHGAP1	3	F	-0.133906	FALSE
66	E63	DAG	2.18826	May	ARHGAP1	3	F	-0.50784	FALSE
66	E63	PI	9.22909	May	ARHGAP1	3	F	-0.469899	FALSE
66	E63	PE	21.3033	May	ARHGAP1	3	F	-0.259376	FALSE
66	E63	LPE	0.184608	May	ARHGAP1	3	F	1.25105	FALSE
66	E63	PG	0.797647	May	ARHGAP1	3	F	0.291669	FALSE
66	E63	CE	2.37222	May	ARHGAP1	3	F	-0.536066	FALSE
66	E63	HCER	1.36124	May	ARHGAP1	3	F	0.465573	FALSE
66	E63	FFA	7.82987	May	ARHGAP1	3	F	-0.457421	FALSE
66	E63	LPC	0.163784	May	ARHGAP1	3	F	0.277875	FALSE
66	E63	CER	0.3878	May	ARHGAP1	3	F	-0.445681	FALSE
66	E63	PC	39.3294	May	ARHGAP1	3	F	1.51292	FALSE
66	E63	DCER	0.0610325	May	ARHGAP1	3	F	-0.677694	FALSE
66	E63	LCER	0.379023	May	ARHGAP1	3	F	-0.143004	FALSE
66	E63	PA	0.565678	May	ARHGAP1	3	F	-0.0187241	FALSE
66	E63	SM	5.36707	May	ARHGAP1	3	F	-0.468996	FALSE
66	E63	TAG	3.80604	May	ARHGAP1	3	F	-0.304906	FALSE
69	E66	PG	0.732899	May	BNIPL	6	F	-0.422655	FALSE
69	E66	PI	10.6622	May	BNIPL	6	F	2.05469	FALSE
69	E66	LPC	0.160953	May	BNIPL	6	F	0.11234	FALSE
69	E66	PA	0.524952	May	BNIPL	6	F	-0.400489	FALSE
69	E66	DCER	0.0992418	May	BNIPL	6	F	1.71444	FALSE
69	E66	CE	2.42652	May	BNIPL	6	F	-0.462801	FALSE
69	E66	FFA	6.95478	May	BNIPL	6	F	-0.776598	FALSE
69	E66	DAG	1.87497	May	BNIPL	6	F	-1.23204	FALSE
69	E66	HCER	1.15152	May	BNIPL	6	F	-0.936211	FALSE
69	E66	LPE	0.198671	May	BNIPL	6	F	1.6541	FALSE
69	E66	SM	5.58584	May	BNIPL	6	F	0.0247158	FALSE
69	E66	PC	36.4953	May	BNIPL	6	F	0.302169	FALSE
69	E66	LCER	0.394743	May	BNIPL	6	F	-0.0405608	FALSE
69	E66	PS	4.28435	May	BNIPL	6	F	-1.04328	FALSE
69	E66	PE	22.987	May	BNIPL	6	F	0.298765	FALSE
69	E66	TAG	5.08027	May	BNIPL	6	F	0.603773	FALSE
69	E66	CER	0.385757	May	BNIPL	6	F	-0.469645	FALSE
74	E69	PC	32.2119	May	ATCAY	9	F	-1.5278	FALSE
74	E69	DCER	0.0567263	May	ATCAY	9	F	-0.947292	FALSE
74	E69	CER	0.408675	May	ATCAY	9	F	-0.200789	FALSE
74	E69	LPC	0.163307	May	ATCAY	9	F	0.249958	FALSE
74	E69	PI	10.6312	May	ATCAY	9	F	2.00005	FALSE
74	E69	PE	26.4267	May	ATCAY	9	F	1.43898	FALSE
74	E69	PA	0.508359	May	ATCAY	9	F	-0.556036	FALSE
74	E69	LPE	0.194131	May	ATCAY	9	F	1.52397	FALSE
74	E69	PG	0.690985	May	ATCAY	9	F	-0.885065	FALSE
74	E69	CE	2.24283	May	ATCAY	9	F	-0.710656	FALSE
74	E69	HCER	1.46935	May	ATCAY	9	F	1.18819	FALSE
74	E69	FFA	7.84711	May	ATCAY	9	F	-0.451135	FALSE
74	E69	PS	4.38533	May	ATCAY	9	F	-0.807602	FALSE
74	E69	SM	5.57708	May	ATCAY	9	F	0.00494132	FALSE
74	E69	DAG	2.04163	May	ATCAY	9	F	-0.846789	FALSE
74	E69	LCER	0.361669	May	ATCAY	9	F	-0.256099	FALSE
74	E69	TAG	4.78308	May	ATCAY	9	F	0.391841	FALSE
75	E70	PI	8.80987	May	TRIO	10	F	-1.2084	FALSE
75	E70	CER	0.430805	May	TRIO	10	F	0.0588247	FALSE
75	E70	DCER	0.0926184	May	TRIO	10	F	1.29978	FALSE
75	E70	PE	22.6762	May	TRIO	10	F	0.195733	FALSE
75	E70	PC	35.6177	May	TRIO	10	F	-0.0727472	FALSE
75	E70	LPE	0.205993	May	TRIO	10	F	1.86397	FALSE
75	E70	LPC	0.163155	May	TRIO	10	F	0.241067	FALSE
75	E70	CE	2.3957	May	TRIO	10	F	-0.50439	FALSE
75	E70	DAG	2.42909	May	TRIO	10	F	0.0488511	FALSE
75	E70	PS	4.4539	May	TRIO	10	F	-0.647583	FALSE
75	E70	FFA	7.52955	May	TRIO	10	F	-0.566959	FALSE
75	E70	SM	5.63217	May	TRIO	10	F	0.129278	FALSE
75	E70	PA	0.483131	May	TRIO	10	F	-0.792528	FALSE
75	E70	PG	0.760033	May	TRIO	10	F	-0.12331	FALSE
75	E70	HCER	1.51433	May	TRIO	10	F	1.48882	FALSE
75	E70	TAG	6.40378	May	TRIO	10	F	1.54758	FALSE
75	E70	LCER	0.401948	May	TRIO	10	F	0.00639545	FALSE
79	E74	PS	5.49786	May	KIAA1755	2	G	1.78875	FALSE
79	E74	PE	20.5983	May	KIAA1755	2	G	-0.493075	FALSE
79	E74	FFA	7.36242	May	KIAA1755	2	G	-0.627918	FALSE
79	E74	HCER	1.43403	May	KIAA1755	2	G	0.952103	FALSE
79	E74	PA	0.539331	May	KIAA1755	2	G	-0.265699	FALSE
79	E74	LPE	0.179236	May	KIAA1755	2	G	1.09707	FALSE
79	E74	CER	0.447064	May	KIAA1755	2	G	0.249571	FALSE
79	E74	PI	9.80141	May	KIAA1755	2	G	0.538315	FALSE
79	E74	SM	6.26024	May	KIAA1755	2	G	1.5467	FALSE
79	E74	DAG	2.25319	May	KIAA1755	2	G	-0.357757	FALSE
79	E74	PC	37.3356	May	KIAA1755	2	G	0.661148	FALSE
79	E74	DCER	0.0589264	May	KIAA1755	2	G	-0.809552	FALSE
79	E74	LPC	0.186562	May	KIAA1755	2	G	1.60966	FALSE
79	E74	PG	0.761032	May	KIAA1755	2	G	-0.112282	FALSE
79	E74	CE	2.60686	May	KIAA1755	2	G	-0.219482	FALSE
79	E74	TAG	4.38103	May	KIAA1755	2	G	0.105131	FALSE
79	E74	LCER	0.296964	May	KIAA1755	2	G	-0.677769	FALSE
80	E75	PE	23.0961	May	KALRN	3	G	0.334917	FALSE
80	E75	FFA	8.04695	May	KALRN	3	G	-0.378246	FALSE
80	E75	SM	5.77829	May	KALRN	3	G	0.459045	FALSE
80	E75	CER	0.451163	May	KALRN	3	G	0.297654	FALSE
80	E75	PS	4.79014	May	KALRN	3	G	0.137102	FALSE
80	E75	LPE	0.126457	May	KALRN	3	G	-0.41561	FALSE
80	E75	HCER	1.51215	May	KALRN	3	G	1.47428	FALSE
80	E75	PA	0.523277	May	KALRN	3	G	-0.416195	FALSE
80	E75	PI	9.06926	May	KALRN	3	G	-0.751444	FALSE
80	E75	CE	2.80904	May	KALRN	3	G	0.0533128	FALSE
80	E75	LPC	0.14634	May	KALRN	3	G	-0.742108	FALSE
80	E75	PG	0.726627	May	KALRN	3	G	-0.491847	FALSE
80	E75	DCER	0.0746019	May	KALRN	3	G	0.171831	FALSE
80	E75	DAG	2.58166	May	KALRN	3	G	0.401541	FALSE
80	E75	TAG	3.81066	May	KALRN	3	G	-0.30161	FALSE
80	E75	PC	36.1281	May	KALRN	3	G	0.145306	FALSE
80	E75	LCER	0.329171	May	KALRN	3	G	-0.467883	FALSE
82	E77	PS	4.66711	May	ESYT2	5	G	-0.150018	FALSE
82	E77	FFA	7.75306	May	ESYT2	5	G	-0.485436	FALSE
82	E77	SM	6.00115	May	ESYT2	5	G	0.961999	FALSE
82	E77	PA	0.433985	May	ESYT2	5	G	-1.25323	FALSE
82	E77	LPC	0.148968	May	ESYT2	5	G	-0.5884	FALSE
82	E77	PI	9.21002	May	ESYT2	5	G	-0.503484	FALSE
82	E77	PG	0.72671	May	ESYT2	5	G	-0.490931	FALSE
82	E77	PC	33.9545	May	ESYT2	5	G	-0.783327	FALSE
82	E77	DCER	0.0917808	May	ESYT2	5	G	1.24734	FALSE
82	E77	CE	2.56168	May	ESYT2	5	G	-0.280434	FALSE
82	E77	LPE	0.169956	May	ESYT2	5	G	0.831094	FALSE
82	E77	DAG	2.60784	May	ESYT2	5	G	0.462049	FALSE
82	E77	LCER	0.459283	May	ESYT2	5	G	0.380041	FALSE
82	E77	PE	24.7306	May	ESYT2	5	G	0.876761	FALSE
82	E77	HCER	1.35797	May	ESYT2	5	G	0.443681	FALSE
82	E77	CER	0.481087	May	ESYT2	5	G	0.6487	FALSE
82	E77	TAG	4.64428	May	ESYT2	5	G	0.292861	FALSE
90	E85	HCER	1.289	May	GRAMD1C	1	H	-0.0172856	FALSE
90	E85	SM	5.63195	May	GRAMD1C	1	H	0.128775	FALSE
90	E85	PS	4.82584	May	GRAMD1C	1	H	0.220421	FALSE
90	E85	PI	9.77429	May	GRAMD1C	1	H	0.49054	FALSE
90	E85	DCER	0.0565116	May	GRAMD1C	1	H	-0.960733	FALSE
90	E85	PA	0.646878	May	GRAMD1C	1	H	0.74246	FALSE
90	E85	FFA	8.04244	May	GRAMD1C	1	H	-0.379889	FALSE
90	E85	PE	19.442	May	GRAMD1C	1	H	-0.876359	FALSE
90	E85	LPE	0.133691	May	GRAMD1C	1	H	-0.208281	FALSE
90	E85	CER	0.348126	May	GRAMD1C	1	H	-0.911104	FALSE
90	E85	CE	2.32027	May	GRAMD1C	1	H	-0.606172	FALSE
90	E85	PG	0.874659	May	GRAMD1C	1	H	1.14129	FALSE
90	E85	DAG	2.69164	May	GRAMD1C	1	H	0.655758	FALSE
90	E85	LPC	0.142932	May	GRAMD1C	1	H	-0.941361	FALSE
90	E85	TAG	2.75468	May	GRAMD1C	1	H	-1.05464	FALSE
90	E85	LCER	0.412661	May	GRAMD1C	1	H	0.076213	FALSE
90	E85	PC	40.6124	May	GRAMD1C	1	H	2.06106	FALSE
91	E86	PS	5.2591	May	VPS13A	2	H	1.23155	FALSE
91	E86	DCER	0.0688894	May	VPS13A	2	H	-0.185807	FALSE
91	E86	FFA	12.0275	May	VPS13A	2	H	1.0736	FALSE
91	E86	PA	0.777819	May	VPS13A	2	H	1.96991	FALSE
91	E86	HCER	1.15806	May	VPS13A	2	H	-0.892534	FALSE
91	E86	PE	18.791	May	VPS13A	2	H	-1.09217	FALSE
91	E86	PC	35.9871	May	VPS13A	2	H	0.0850438	FALSE
91	E86	PI	9.13909	May	VPS13A	2	H	-0.628434	FALSE
91	E86	CER	0.538209	May	VPS13A	2	H	1.31882	FALSE
91	E86	DAG	3.51731	May	VPS13A	2	H	2.56435	FALSE
91	E86	PG	1.0162	May	VPS13A	2	H	2.70277	FALSE
91	E86	TAG	1.89672	May	VPS13A	2	H	-1.66647	FALSE
91	E86	LPE	0.117971	May	VPS13A	2	H	-0.65883	FALSE
91	E86	CE	3.73073	May	VPS13A	2	H	1.29693	FALSE
91	E86	LPC	0.164534	May	VPS13A	2	H	0.321711	FALSE
91	E86	SM	5.27076	May	VPS13A	2	H	-0.686358	FALSE
91	E86	LCER	0.539061	May	VPS13A	2	H	0.899937	FALSE
92	E87	SM	6.22852	May	VPS13B	3	H	1.47512	FALSE
92	E87	PE	22.5787	May	VPS13B	3	H	0.163418	FALSE
92	E87	PA	0.535487	May	VPS13B	3	H	-0.30173	FALSE
92	E87	CER	0.490974	May	VPS13B	3	H	0.764691	FALSE
92	E87	CE	2.80303	May	VPS13B	3	H	0.045213	FALSE
92	E87	DAG	2.24951	May	VPS13B	3	H	-0.36626	FALSE
92	E87	PS	5.01348	May	VPS13B	3	H	0.65834	FALSE
92	E87	LPE	0.141398	May	VPS13B	3	H	0.0126037	FALSE
92	E87	PC	35.315	May	VPS13B	3	H	-0.202073	FALSE
92	E87	FFA	8.04382	May	VPS13B	3	H	-0.379386	FALSE
92	E87	LPC	0.151165	May	VPS13B	3	H	-0.459939	FALSE
92	E87	DCER	0.088198	May	VPS13B	3	H	1.02303	FALSE
92	E87	PG	0.668542	May	VPS13B	3	H	-1.13266	FALSE
92	E87	HCER	1.28233	May	VPS13B	3	H	-0.0618827	FALSE
92	E87	LCER	0.344444	May	VPS13B	3	H	-0.368348	FALSE
92	E87	PI	9.70798	May	VPS13B	3	H	0.373725	FALSE
92	E87	TAG	4.35738	May	VPS13B	3	H	0.088269	FALSE
94	E89	PS	5.1755	May	VPS13D	5	H	1.03643	FALSE
94	E89	PE	21.6744	May	VPS13D	5	H	-0.136358	FALSE
94	E89	CER	0.418362	May	VPS13D	5	H	-0.0871442	FALSE
94	E89	SM	5.94747	May	VPS13D	5	H	0.840837	FALSE
94	E89	PC	36.2949	May	VPS13D	5	H	0.216564	FALSE
94	E89	CE	3.38152	May	VPS13D	5	H	0.825739	FALSE
94	E89	DCER	0.0958597	May	VPS13D	5	H	1.5027	FALSE
94	E89	LPC	0.160683	May	VPS13D	5	H	0.0965558	FALSE
94	E89	FFA	7.91662	May	VPS13D	5	H	-0.425781	FALSE
94	E89	PA	0.678837	May	VPS13D	5	H	1.04205	FALSE
94	E89	DAG	2.515	May	VPS13D	5	H	0.24744	FALSE
94	E89	LPE	0.155867	May	VPS13D	5	H	0.42729	FALSE
94	E89	TAG	3.44853	May	VPS13D	5	H	-0.55985	FALSE
94	E89	PG	0.908255	May	VPS13D	5	H	1.51193	FALSE
94	E89	HCER	1.05965	May	VPS13D	5	H	-1.55031	FALSE
94	E89	LCER	0.359367	May	VPS13D	5	H	-0.271102	FALSE
94	E89	PI	9.80919	May	VPS13D	5	H	0.552009	FALSE
97	E91	SM	4.95047	May	NonTarget_1	7	H	-1.40918	TRUE
97	E91	DAG	1.64584	May	NonTarget_1	7	H	-1.76167	TRUE
97	E91	HCER	1.29215	May	NonTarget_1	7	H	0.00373958	TRUE
97	E91	LPE	0.1206	May	NonTarget_1	7	H	-0.583476	TRUE
97	E91	PA	0.481432	May	NonTarget_1	7	H	-0.808453	TRUE
97	E91	FFA	8.03621	May	NonTarget_1	7	H	-0.382163	TRUE
97	E91	PS	4.53633	May	NonTarget_1	7	H	-0.455206	TRUE
97	E91	CER	0.328469	May	NonTarget_1	7	H	-1.14171	TRUE
97	E91	LCER	0.235065	May	NonTarget_1	7	H	-1.08115	TRUE
97	E91	PG	0.811398	May	NonTarget_1	7	H	0.443366	TRUE
97	E91	PI	8.73539	May	NonTarget_1	7	H	-1.3396	TRUE
97	E91	DCER	0.0666765	May	NonTarget_1	7	H	-0.32435	TRUE
97	E91	TAG	7.60001	May	NonTarget_1	7	H	2.40064	TRUE
97	E91	CE	2.05349	May	NonTarget_1	7	H	-0.966124	TRUE
97	E91	PE	28.0334	May	NonTarget_1	7	H	1.97158	TRUE
97	E91	PC	30.9118	May	NonTarget_1	7	H	-2.08322	TRUE
97	E91	LPC	0.161321	May	NonTarget_1	7	H	0.133875	TRUE
98	E92	HCER	1.33395	May	NonTarget_2	8	H	0.283155	TRUE
98	E92	DAG	1.8494	May	NonTarget_2	8	H	-1.29114	TRUE
98	E92	SM	6.13288	May	NonTarget_2	8	H	1.25928	TRUE
98	E92	FFA	8.80092	May	NonTarget_2	8	H	-0.103245	TRUE
98	E92	CER	0.442137	May	NonTarget_2	8	H	0.19177	TRUE
98	E92	DCER	0.0637798	May	NonTarget_2	8	H	-0.505698	TRUE
98	E92	PG	0.76623	May	NonTarget_2	8	H	-0.0549345	TRUE
98	E92	CE	3.05913	May	NonTarget_2	8	H	0.390761	TRUE
98	E92	LCER	0.347571	May	NonTarget_2	8	H	-0.347974	TRUE
98	E92	PE	21.3287	May	NonTarget_2	8	H	-0.250956	TRUE
98	E92	TAG	3.91019	May	NonTarget_2	8	H	-0.230629	TRUE
98	E92	PS	5.04791	May	NonTarget_2	8	H	0.738678	TRUE
98	E92	PA	0.520976	May	NonTarget_2	8	H	-0.437764	TRUE
98	E92	PC	36.5572	May	NonTarget_2	8	H	0.328606	TRUE
98	E92	LPC	0.153513	May	NonTarget_2	8	H	-0.322697	TRUE
98	E92	LPE	0.112648	May	NonTarget_2	8	H	-0.811394	TRUE
98	E92	PI	9.57289	May	NonTarget_2	8	H	0.135753	TRUE
101	E93	HCER	1.28586	May	NonTarget_3	9	H	-0.0382779	TRUE
101	E93	PG	0.747882	May	NonTarget_3	9	H	-0.257362	TRUE
101	E93	SM	5.53013	May	NonTarget_3	9	H	-0.101017	TRUE
101	E93	DAG	2.62918	May	NonTarget_3	9	H	0.511372	TRUE
101	E93	PA	0.438076	May	NonTarget_3	9	H	-1.21488	TRUE
101	E93	PE	22.5152	May	NonTarget_3	9	H	0.142384	TRUE
101	E93	FFA	8.57831	May	NonTarget_3	9	H	-0.184441	TRUE
101	E93	DCER	0.0723067	May	NonTarget_3	9	H	0.0281347	TRUE
101	E93	CER	0.361746	May	NonTarget_3	9	H	-0.751327	TRUE
101	E93	PC	37.0234	May	NonTarget_3	9	H	0.527752	TRUE
101	E93	PS	4.45126	May	NonTarget_3	9	H	-0.653748	TRUE
101	E93	LPE	0.10342	May	NonTarget_3	9	H	-1.07587	TRUE
101	E93	CE	2.22184	May	NonTarget_3	9	H	-0.738975	TRUE
101	E93	PI	10.114	May	NonTarget_3	9	H	1.08899	TRUE
101	E93	TAG	3.44392	May	NonTarget_3	9	H	-0.563134	TRUE
101	E93	LPC	0.181912	May	NonTarget_3	9	H	1.33782	TRUE
101	E93	LCER	0.30155	May	NonTarget_3	9	H	-0.647885	TRUE
103	E94	SM	5.51364	May	NonTarget_4	10	H	-0.138222	TRUE
103	E94	PS	4.46398	May	NonTarget_4	10	H	-0.624057	TRUE
103	E94	PI	8.85851	May	NonTarget_4	10	H	-1.12271	TRUE
103	E94	PG	0.66087	May	NonTarget_4	10	H	-1.2173	TRUE
103	E94	HCER	1.14395	May	NonTarget_4	10	H	-0.986839	TRUE
103	E94	DAG	2.52701	May	NonTarget_4	10	H	0.275218	TRUE
103	E94	FFA	8.57707	May	NonTarget_4	10	H	-0.184893	TRUE
103	E94	CER	0.361945	May	NonTarget_4	10	H	-0.748988	TRUE
103	E94	LPE	0.110022	May	NonTarget_4	10	H	-0.886653	TRUE
103	E94	CE	2.48604	May	NonTarget_4	10	H	-0.382502	TRUE
103	E94	LCER	0.317746	May	NonTarget_4	10	H	-0.542339	TRUE
103	E94	PA	0.53198	May	NonTarget_4	10	H	-0.334605	TRUE
103	E94	PE	22.9395	May	NonTarget_4	10	H	0.283026	TRUE
103	E94	PC	37.4706	May	NonTarget_4	10	H	0.718832	TRUE
103	E94	DCER	0.0545303	May	NonTarget_4	10	H	-1.08477	TRUE
103	E94	TAG	3.84137	May	NonTarget_4	10	H	-0.279711	TRUE
103	E94	LPC	0.141195	May	NonTarget_4	10	H	-1.04291	TRUE
106	E95	DAG	2.03598	May	NonTarget_5	11	H	-0.859852	TRUE
106	E95	HCER	1.2253	May	NonTarget_5	11	H	-0.443121	TRUE
106	E95	DCER	0.0431841	May	NonTarget_5	11	H	-1.79512	TRUE
106	E95	CER	0.344444	May	NonTarget_5	11	H	-0.954309	TRUE
106	E95	PA	0.551437	May	NonTarget_5	11	H	-0.152214	TRUE
106	E95	CE	2.18221	May	NonTarget_5	11	H	-0.792446	TRUE
106	E95	PG	0.718017	May	NonTarget_5	11	H	-0.586835	TRUE
106	E95	SM	5.53789	May	NonTarget_5	11	H	-0.083489	TRUE
106	E95	FFA	7.65328	May	NonTarget_5	11	H	-0.521832	TRUE
106	E95	PS	4.43291	May	NonTarget_5	11	H	-0.69657	TRUE
106	E95	PC	32.6108	May	NonTarget_5	11	H	-1.35734	TRUE
106	E95	LCER	0.324466	May	NonTarget_5	11	H	-0.498546	TRUE
106	E95	LPE	0.111728	May	NonTarget_5	11	H	-0.83777	TRUE
106	E95	LPC	0.129126	May	NonTarget_5	11	H	-1.7486	TRUE
106	E95	PE	26.9293	May	NonTarget_5	11	H	1.60558	TRUE
106	E95	TAG	6.35202	May	NonTarget_5	11	H	1.51067	TRUE
106	E95	PI	8.8179	May	NonTarget_5	11	H	-1.19425	TRUE
109	E96	SM	5.8232	May	NonTarget_6	12	H	0.560388	TRUE
109	E96	FFA	8.11143	May	NonTarget_6	12	H	-0.354728	TRUE
109	E96	LCER	0.324831	May	NonTarget_6	12	H	-0.496168	TRUE
109	E96	PS	4.60894	May	NonTarget_6	12	H	-0.285764	TRUE
109	E96	PG	0.753072	May	NonTarget_6	12	H	-0.200099	TRUE
109	E96	HCER	1.13354	May	NonTarget_6	12	H	-1.05645	TRUE
109	E96	LPE	0.146809	May	NonTarget_6	12	H	0.167696	TRUE
109	E96	PE	23.2028	May	NonTarget_6	12	H	0.370283	TRUE
109	E96	CER	0.309594	May	NonTarget_6	12	H	-1.36314	TRUE
109	E96	DAG	2.62963	May	NonTarget_6	12	H	0.512431	TRUE
109	E96	LPC	0.15192	May	NonTarget_6	12	H	-0.415829	TRUE
109	E96	PC	36.0104	May	NonTarget_6	12	H	0.0949976	TRUE
109	E96	PI	9.11786	May	NonTarget_6	12	H	-0.665842	TRUE
109	E96	CE	2.18204	May	NonTarget_6	12	H	-0.792671	TRUE
109	E96	DCER	0.0631172	May	NonTarget_6	12	H	-0.547185	TRUE
109	E96	TAG	4.78676	May	NonTarget_6	12	H	0.394463	TRUE
109	E96	PA	0.644121	May	NonTarget_6	12	H	0.716617	TRUE
57	F85	CER	0.772327	Sept	GRAMD1C	1	H	NA	FALSE
57	F85	TAG	2.62895	Sept	GRAMD1C	1	H	NA	FALSE
57	F85	PG	0.923296	Sept	GRAMD1C	1	H	NA	FALSE
57	F85	PA	0.523048	Sept	GRAMD1C	1	H	NA	FALSE
57	F85	HCER	1.92473	Sept	GRAMD1C	1	H	NA	FALSE
57	F85	PI	8.14806	Sept	GRAMD1C	1	H	NA	FALSE
57	F85	DCER	0.0869633	Sept	GRAMD1C	1	H	NA	FALSE
57	F85	LPC	0.144248	Sept	GRAMD1C	1	H	NA	FALSE
57	F85	LCER	0.754609	Sept	GRAMD1C	1	H	NA	FALSE
57	F85	PS	4.804	Sept	GRAMD1C	1	H	NA	FALSE
57	F85	SM	5.86787	Sept	GRAMD1C	1	H	NA	FALSE
57	F85	DAG	3.27198	Sept	GRAMD1C	1	H	NA	FALSE
57	F85	PC	33.8778	Sept	GRAMD1C	1	H	NA	FALSE
57	F85	FFA	7.54992	Sept	GRAMD1C	1	H	NA	FALSE
57	F85	LPE	0.121804	Sept	GRAMD1C	1	H	NA	FALSE
57	F85	PE	24.6277	Sept	GRAMD1C	1	H	NA	FALSE
57	F85	CE	3.97269	Sept	GRAMD1C	1	H	NA	FALSE
1	H01	FFA	6.34707	August	OSBP	1	A	0.588773	FALSE
1	H01	HCER	1.29179	August	OSBP	1	A	-0.361156	FALSE
1	H01	LCER	0.300597	August	OSBP	1	A	-0.056719	FALSE
1	H01	PG	1.00357	August	OSBP	1	A	1.07391	FALSE
1	H01	LPC	0.142664	August	OSBP	1	A	-1.16478	FALSE
1	H01	PI	11.4541	August	OSBP	1	A	0.801262	FALSE
1	H01	LPE	0.104693	August	OSBP	1	A	-2.14354	FALSE
1	H01	PA	0.394088	August	OSBP	1	A	-0.631487	FALSE
1	H01	SM	5.97352	August	OSBP	1	A	-1.11866	FALSE
1	H01	PC	31.4957	August	OSBP	1	A	-2.27497	FALSE
1	H01	CE	1.99755	August	OSBP	1	A	-1.20347	FALSE
1	H01	PE	21.9783	August	OSBP	1	A	-0.0781438	FALSE
1	H01	PS	2.99675	August	OSBP	1	A	-2.57653	FALSE
1	H01	DAG	3.252	August	OSBP	1	A	0.462403	FALSE
1	H01	TAG	10.9575	August	OSBP	1	A	4.93088	FALSE
1	H01	DCER	0.035788	August	OSBP	1	A	-1.24738	FALSE
1	H01	CER	0.274277	August	OSBP	1	A	-1.88908	FALSE
2	H02	FFA	6.00629	August	OSBPL1A	2	A	0.181613	FALSE
2	H02	CER	0.441365	August	OSBPL1A	2	A	0.399259	FALSE
2	H02	TAG	3.35376	August	OSBPL1A	2	A	-0.854188	FALSE
2	H02	SM	6.61151	August	OSBPL1A	2	A	-0.196808	FALSE
2	H02	PC	37.4197	August	OSBPL1A	2	A	0.509016	FALSE
2	H02	PA	0.425197	August	OSBPL1A	2	A	-0.298029	FALSE
2	H02	HCER	1.36626	August	OSBPL1A	2	A	-0.0459779	FALSE
2	H02	LCER	0.264338	August	OSBPL1A	2	A	-0.568244	FALSE
2	H02	PG	0.877714	August	OSBPL1A	2	A	-0.038502	FALSE
2	H02	LPC	0.264033	August	OSBPL1A	2	A	0.34605	FALSE
[truncated: 2,166 more rows]

## Sheet: Lipid Species Amounts
SampleRoster	SampleID	TargetGeneSymbol	LipidClass	LipidSpecies	Amount (nmol)
9	B09	OSBPL8	TAG	TAG 52:2-18:2	5.03493
9	B09	OSBPL8	FA	FA 20:3	1.52161
9	B09	OSBPL8	PS	PS 16:0-16:1	1.92536
9	B09	OSBPL8	TAG	TAG 52:4-18:2	2.26935
9	B09	OSBPL8	PG	PG 17:0-20:0	0.789663
9	B09	OSBPL8	PE-O	PE-O 18:0-20:3	1.148
9	B09	OSBPL8	TAG	TAG 47:1-17:0	0.0494014
9	B09	OSBPL8	TAG	TAG 52:2-14:0	0.160221
9	B09	OSBPL8	PC	PC 16:0-20:1	5.56258
9	B09	OSBPL8	TAG	TAG 50:1-20:1	0.169122
9	B09	OSBPL8	TAG	TAG 52:5-18:1	0.0810004
9	B09	OSBPL8	TAG	TAG 50:6-20:4	NA
9	B09	OSBPL8	PI	PI 15:0-18:0	NA
9	B09	OSBPL8	TAG	TAG 54:5-18:3	0.241666
9	B09	OSBPL8	TAG	TAG 44:1-12:0	0.0494508
9	B09	OSBPL8	TAG	TAG 50:1-16:0	19.5923
9	B09	OSBPL8	TAG	TAG 49:0-16:0	3.37888
9	B09	OSBPL8	PI	PI 15:0-20:3	NA
9	B09	OSBPL8	TAG	TAG 44:2-18:1	NA
9	B09	OSBPL8	TAG	TAG 52:2-16:1	1.15893
9	B09	OSBPL8	TAG	TAG 54:3-18:2	2.58534
9	B09	OSBPL8	TAG	TAG 54:7-18:1	0.160221
9	B09	OSBPL8	PA	PA 30:0	0.593448
9	B09	OSBPL8	TAG	TAG 56:3-20:0	0.0761048
9	B09	OSBPL8	TAG	TAG 50:2-20:2	0.0636432
9	B09	OSBPL8	TAG	TAG 56:7-20:5	0.136633
9	B09	OSBPL8	PE-P	PE-P 18:0-22:5	NA
9	B09	OSBPL8	PC	PC 15:0-18:2	2.13445
9	B09	OSBPL8	TAG	TAG 58:9-18:1	0.133072
9	B09	OSBPL8	TAG	TAG 56:9-22:6	NA
9	B09	OSBPL8	TAG	TAG 48:4-14:1	NA
9	B09	OSBPL8	TAG	TAG 48:4-16:1	0.0217584
9	B09	OSBPL8	PC	PC 18:0-20:4	13.6285
9	B09	OSBPL8	PA	PA 36:4	1.93377
9	B09	OSBPL8	TAG	TAG 52:4-20:4	0.280386
9	B09	OSBPL8	PC	PC 16:0-22:2	NA
9	B09	OSBPL8	TAG	TAG 58:10-18:2	NA
9	B09	OSBPL8	TAG	TAG 47:2-18:2	0.0689839
9	B09	OSBPL8	PG	PG 16:0-20:2	0.927842
9	B09	OSBPL8	PC	PC 18:1-20:3	7.6629
9	B09	OSBPL8	PA	PA 34:0	1.46191
9	B09	OSBPL8	TAG	TAG 50:4-18:2	0.15577
9	B09	OSBPL8	PI	PI 18:0-20:3	56.9242
9	B09	OSBPL8	PS	PS 17:0-20:3	0.61299
9	B09	OSBPL8	CE	CE 22:5	1.75997
9	B09	OSBPL8	TAG	TAG 50:2-18:1	5.1413
9	B09	OSBPL8	LPC	LPC 16:1	0.467977
9	B09	OSBPL8	TAG	TAG 52:1-16:1	0.848279
9	B09	OSBPL8	TAG	TAG 50:2-16:0	9.30081
9	B09	OSBPL8	PE-P	PE-P 18:0-20:4	50.038
9	B09	OSBPL8	PI	PI 16:0-16:0	0.293211
9	B09	OSBPL8	PA	PA 40:5	NA
9	B09	OSBPL8	TAG	TAG 48:3-18:1	0.0738795
9	B09	OSBPL8	PA	PA 28:0	NA
9	B09	OSBPL8	PI	PI 18:0-20:4	137.23
9	B09	OSBPL8	LPE	LPE 17:0	NA
9	B09	OSBPL8	TAG	TAG 52:5-20:4	0.125951
9	B09	OSBPL8	PC	PC 17:0-18:2	6.60722
9	B09	OSBPL8	PI	PI 18:1-20:3	12.0481
9	B09	OSBPL8	TAG	TAG 54:1-18:0	18.6973
9	B09	OSBPL8	TAG	TAG 50:4-14:0	0.0685388
9	B09	OSBPL8	TAG	TAG 51:4-18:3	0.0525168
9	B09	OSBPL8	TAG	TAG 46:2-18:1	0.0970225
9	B09	OSBPL8	TAG	TAG 48:0-16:0	6.9202
9	B09	OSBPL8	PA	PA 32:2	0.801878
9	B09	OSBPL8	TAG	TAG 55:2-18:2	0.105479
9	B09	OSBPL8	PI	PI 16:0-20:4	2.22602
9	B09	OSBPL8	TAG	TAG 54:5-22:4	0.0525168
9	B09	OSBPL8	FA	FA 12:0	3.2581
9	B09	OSBPL8	TAG	TAG 49:2-15:0	0.488228
9	B09	OSBPL8	TAG	TAG 50:0-18:0	13.2262
9	B09	OSBPL8	TAG	TAG 54:6-20:3	0.0346156
9	B09	OSBPL8	TAG	TAG 52:3-16:1	1.73528
9	B09	OSBPL8	TAG	TAG 51:4-16:1	0.069429
9	B09	OSBPL8	PC	PC 14:0-18:0	3.77373
9	B09	OSBPL8	TAG	TAG 52:3-20:2	0.11616
9	B09	OSBPL8	TAG	TAG 54:1-20:1	0.518047
9	B09	OSBPL8	TAG	TAG 52:5-14:0	0.0393524
9	B09	OSBPL8	TAG	TAG 53:0-16:0	0.687614
9	B09	OSBPL8	CER	CER 18:1	0.199412
9	B09	OSBPL8	TAG	TAG 54:7-18:2	0.0687366
9	B09	OSBPL8	PE	PE 18:1-18:2	102.283
9	B09	OSBPL8	FA	FA 22:5	0.80949
9	B09	OSBPL8	TAG	TAG 47:0-17:0	0.213182
9	B09	OSBPL8	TAG	TAG 52:3-18:3	0.31332
9	B09	OSBPL8	TAG	TAG 50:3-18:3	0.248342
9	B09	OSBPL8	TAG	TAG 55:3-18:1	0.296408
9	B09	OSBPL8	SM	SM 14:0	10.4275
9	B09	OSBPL8	TAG	TAG 56:4-22:4	0.146424
9	B09	OSBPL8	PS	PS 18:2-20:2	NA
9	B09	OSBPL8	PC	PC 16:0-22:5	3.18763
9	B09	OSBPL8	TAG	TAG 51:1-17:0	1.67564
9	B09	OSBPL8	PC	PC 16:0-20:5	NA
9	B09	OSBPL8	PA	PA 36:2	8.36327
9	B09	OSBPL8	PE-P	PE-P 16:0-18:1	32.5966
9	B09	OSBPL8	PI	PI 18:1-22:4	1.46295
9	B09	OSBPL8	TAG	TAG 56:6-20:5	0.343139
9	B09	OSBPL8	TAG	TAG 50:5-20:4	NA
9	B09	OSBPL8	TAG	TAG 52:4-20:3	0.105479
9	B09	OSBPL8	PE-O	PE-O 18:0-20:5	NA
9	B09	OSBPL8	TAG	TAG 38:0-12:0	NA
9	B09	OSBPL8	PS	PS 18:0-18:0	3.43894
9	B09	OSBPL8	TAG	TAG 52:4-18:0	0.0609729
9	B09	OSBPL8	TAG	TAG 48:2-16:1	0.848724
9	B09	OSBPL8	TAG	TAG 49:2-16:0	0.870532
9	B09	OSBPL8	PI	PI 17:0-20:3	NA
9	B09	OSBPL8	PE-O	PE-O 16:0-22:2	NA
9	B09	OSBPL8	PE	PE 14:0-18:2	0.743343
9	B09	OSBPL8	TAG	TAG 51:2-18:1	2.4941
9	B09	OSBPL8	PG	PG 18:1-22:5	NA
9	B09	OSBPL8	PC	PC 17:0-18:1	10.2185
9	B09	OSBPL8	DAG	DAG 18:1-20:2	1.37666
9	B09	OSBPL8	PG	PG 18:1-20:0	NA
9	B09	OSBPL8	TAG	TAG 48:1-14:0	2.48832
9	B09	OSBPL8	TAG	TAG 52:1-20:0	0.116605
9	B09	OSBPL8	PS	PS 18:0-22:4	13.6522
9	B09	OSBPL8	TAG	TAG 53:2-18:1	1.85455
9	B09	OSBPL8	TAG	TAG 48:4-14:0	NA
9	B09	OSBPL8	CE	CE 18:0	7.08935
9	B09	OSBPL8	PC	PC 14:1-16:0	NA
9	B09	OSBPL8	TAG	TAG 55:7-22:6	0.0587476
9	B09	OSBPL8	PE-O	PE-O 18:0-18:3	NA
9	B09	OSBPL8	TAG	TAG 48:3-16:0	0.132182
9	B09	OSBPL8	PE	PE 14:1-18:2	1.49423
9	B09	OSBPL8	FA	FA 24:1	38.8882
9	B09	OSBPL8	LCER	LCER 18:1	NA
9	B09	OSBPL8	TAG	TAG 56:8-20:5	0.0783301
9	B09	OSBPL8	PC	PC 18:0-18:0	3.05084
9	B09	OSBPL8	TAG	TAG 54:5-18:1	0.976011
9	B09	OSBPL8	PE-O	PE-O 16:0-20:2	NA
9	B09	OSBPL8	PE	PE 18:0-18:1	111.235
9	B09	OSBPL8	TAG	TAG 54:4-20:4	0.400107
9	B09	OSBPL8	PE-P	PE-P 18:1-20:3	5.82335
9	B09	OSBPL8	PA	PA 34:4	2.50985
9	B09	OSBPL8	PE	PE 16:0-20:4	7.87405
9	B09	OSBPL8	PC	PC 18:1-18:2	282.675
9	B09	OSBPL8	PE	PE 18:1-20:2	1.73985
9	B09	OSBPL8	HCER	HCER 18:0	5.94401
9	B09	OSBPL8	TAG	TAG 56:8-22:5	NA
9	B09	OSBPL8	PC	PC 16:1-18:2	37.4333
9	B09	OSBPL8	PS	PS 16:1-18:1	8.90656
9	B09	OSBPL8	TAG	TAG 50:3-18:2	1.36054
9	B09	OSBPL8	TAG	TAG 58:7-20:4	NA
9	B09	OSBPL8	TAG	TAG 48:0-18:0	2.2373
9	B09	OSBPL8	TAG	TAG 48:4-18:3	NA
9	B09	OSBPL8	TAG	TAG 48:4-18:1	NA
9	B09	OSBPL8	LPC	LPC 17:0	NA
9	B09	OSBPL8	TAG	TAG 60:12-22:6	NA
9	B09	OSBPL8	TAG	TAG 52:4-18:3	0.474876
9	B09	OSBPL8	TAG	TAG 47:0-15:0	0.627086
9	B09	OSBPL8	TAG	TAG 54:6-16:0	0.184699
9	B09	OSBPL8	PE-O	PE-O 18:0-18:1	11.5132
9	B09	OSBPL8	PI	PI 18:0-20:0	NA
9	B09	OSBPL8	PE	PE 14:0-16:0	NA
9	B09	OSBPL8	PI	PI 18:2-20:4	NA
9	B09	OSBPL8	TAG	TAG 51:1-18:1	3.36686
9	B09	OSBPL8	PE	PE 17:0-20:4	1.71601
9	B09	OSBPL8	TAG	TAG 52:6-14:0	NA
9	B09	OSBPL8	PG	PG 18:1-20:1	NA
9	B09	OSBPL8	PS	PS 18:1-20:2	3.80085
9	B09	OSBPL8	PI	PI 16:0-18:2	6.11816
9	B09	OSBPL8	TAG	TAG 54:6-22:6	0.0903466
9	B09	OSBPL8	SM	SM 24:1	45.6159
9	B09	OSBPL8	TAG	TAG 58:9-20:4	NA
9	B09	OSBPL8	PS	PS 17:0-18:1	5.35395
9	B09	OSBPL8	TAG	TAG 49:2-17:0	0.0912368
9	B09	OSBPL8	TAG	TAG 50:3-18:0	0.0569673
9	B09	OSBPL8	PS	PS 18:2-20:1	3.45201
9	B09	OSBPL8	PI	PI 17:0-20:1	NA
9	B09	OSBPL8	PE-O	PE-O 16:0-16:1	NA
9	B09	OSBPL8	TAG	TAG 54:4-20:3	0.445502
9	B09	OSBPL8	TAG	TAG 52:5-18:3	0.206507
9	B09	OSBPL8	PI	PI 16:1-18:1	13.1436
9	B09	OSBPL8	TAG	TAG 58:6-18:1	0.0791734
9	B09	OSBPL8	TAG	TAG 56:7-16:1	0.028187
9	B09	OSBPL8	PE	PE 16:0-20:3	1.49432
9	B09	OSBPL8	PS	PS 18:0-20:1	NA
9	B09	OSBPL8	PE	PE 18:1-20:5	NA
9	B09	OSBPL8	TAG	TAG 54:6-20:4	0.246562
9	B09	OSBPL8	TAG	TAG 60:10-22:5	NA
9	B09	OSBPL8	TAG	TAG 54:2-20:2	0.187369
9	B09	OSBPL8	TAG	TAG 52:7-18:1	0.234545
9	B09	OSBPL8	TAG	TAG 56:5-20:2	0.0609729
9	B09	OSBPL8	HCER	HCER 16:0	50.3389
9	B09	OSBPL8	PE-P	PE-P 18:2-20:4	0.982758
9	B09	OSBPL8	TAG	TAG 54:0-18:0	30.6898
9	B09	OSBPL8	TAG	TAG 54:8-20:5	0.0453959
9	B09	OSBPL8	TAG	TAG 58:6-18:0	0.0899016
9	B09	OSBPL8	PC	PC 18:0-22:6	NA
9	B09	OSBPL8	PE	PE 18:1-18:3	0.838405
9	B09	OSBPL8	TAG	TAG 56:5-22:4	0.166451
9	B09	OSBPL8	PE	PE 14:1-18:1	0.921497
9	B09	OSBPL8	TAG	TAG 46:3-16:0	NA
9	B09	OSBPL8	TAG	TAG 55:1-18:1	0.381414
9	B09	OSBPL8	TAG	TAG 49:1-16:0	3.54844
9	B09	OSBPL8	LCER	LCER 14:0	1.35371
9	B09	OSBPL8	TAG	TAG 49:0-17:0	0.915038
9	B09	OSBPL8	TAG	TAG 42:2-18:2	NA
9	B09	OSBPL8	LPC	LPC 20:3	NA
9	B09	OSBPL8	PI	PI 18:1-20:4	22.6885
9	B09	OSBPL8	PG	PG 18:0-18:2	2.25591
9	B09	OSBPL8	CE	CE 18:4	0.640845
9	B09	OSBPL8	PE	PE 16:0-22:4	1.06728
9	B09	OSBPL8	TAG	TAG 52:0-18:0	49.882
9	B09	OSBPL8	TAG	TAG 50:5-16:0	NA
9	B09	OSBPL8	FA	FA 14:1	1.22804
9	B09	OSBPL8	TAG	TAG 54:3-16:1	0.145979
9	B09	OSBPL8	TAG	TAG 58:9-22:5	NA
9	B09	OSBPL8	LCER	LCER 24:0	8.64012
9	B09	OSBPL8	DAG	DAG 16:0-18:1	49.5052
9	B09	OSBPL8	TAG	TAG 46:4-18:2	NA
9	B09	OSBPL8	PE-P	PE-P 16:0-22:6	NA
9	B09	OSBPL8	TAG	TAG 48:5-18:3	NA
9	B09	OSBPL8	TAG	TAG 50:2-16:1	3.36374
9	B09	OSBPL8	TAG	TAG 54:4-18:3	0.180248
9	B09	OSBPL8	TAG	TAG 47:2-14:0	0.0916818
9	B09	OSBPL8	PC	PC 16:0-18:2	306.21
9	B09	OSBPL8	TAG	TAG 54:3-20:3	0.363167
9	B09	OSBPL8	TAG	TAG 50:1-18:0	3.29342
9	B09	OSBPL8	PS	PS 18:0-20:4	6.73129
9	B09	OSBPL8	PS	PS 18:0-18:2	95.6836
9	B09	OSBPL8	PI	PI 18:0-20:5	1.24535
9	B09	OSBPL8	PS	PS 17:0-20:0	1.38687
9	B09	OSBPL8	TAG	TAG 48:3-12:0	NA
9	B09	OSBPL8	TAG	TAG 52:3-22:1	NA
9	B09	OSBPL8	TAG	TAG 56:5-20:3	0.163781
9	B09	OSBPL8	HCER	HCER 14:0	2.24072
9	B09	OSBPL8	PC	PC 12:0-18:1	1.06187
9	B09	OSBPL8	TAG	TAG 52:3-18:0	0.664471
9	B09	OSBPL8	PE-P	PE-P 16:0-20:5	NA
9	B09	OSBPL8	PS	PS 18:1-18:2	14.9905
9	B09	OSBPL8	TAG	TAG 42:1-12:0	NA
9	B09	OSBPL8	TAG	TAG 47:1-16:1	0.327562
9	B09	OSBPL8	TAG	TAG 50:5-18:1	NA
9	B09	OSBPL8	TAG	TAG 54:3-18:1	19.6457
9	B09	OSBPL8	TAG	TAG 50:4-18:1	0.0663135
9	B09	OSBPL8	PE-P	PE-P 18:0-20:3	9.22244
9	B09	OSBPL8	PA	PA 34:1	9.65438
9	B09	OSBPL8	TAG	TAG 52:3-20:1	0.0548123
9	B09	OSBPL8	TAG	TAG 56:5-18:2	0.133517
9	B09	OSBPL8	TAG	TAG 50:3-18:1	0.938626
9	B09	OSBPL8	PI	PI 17:0-18:1	2.38517
9	B09	OSBPL8	TAG	TAG 58:7-18:0	0.147314
9	B09	OSBPL8	PS	PS 18:2-20:0	2.04069
9	B09	OSBPL8	PS	PS 18:1-20:4	NA
9	B09	OSBPL8	TAG	TAG 52:5-18:2	0.295073
9	B09	OSBPL8	TAG	TAG 52:1-20:1	0.579465
9	B09	OSBPL8	PS	PS 18:1-18:1	48.6428
9	B09	OSBPL8	DAG	DAG 16:1-18:0	2.20781
9	B09	OSBPL8	PC	PC 18:0-18:3	2.20551
9	B09	OSBPL8	PE-P	PE-P 18:0-18:1	21.2499
9	B09	OSBPL8	TAG	TAG 52:3-18:2	5.80221
9	B09	OSBPL8	LPE	LPE 20:3	0.269202
9	B09	OSBPL8	PE-O	PE-O 16:0-20:1	NA
9	B09	OSBPL8	TAG	TAG 58:7-18:1	0.0525168
9	B09	OSBPL8	PE	PE 18:2-22:5	NA
9	B09	OSBPL8	TAG	TAG 51:1-18:0	2.0348
9	B09	OSBPL8	PC	PC 18:1-22:2	NA
9	B09	OSBPL8	TAG	TAG 53:4-18:3	0.0469783
9	B09	OSBPL8	TAG	TAG 44:3-18:2	NA
9	B09	OSBPL8	PE	PE 14:1-18:0	NA
9	B09	OSBPL8	TAG	TAG 49:2-16:1	0.514486
9	B09	OSBPL8	PA	PA 38:1	NA
9	B09	OSBPL8	PI	PI 16:1-18:0	4.46602
9	B09	OSBPL8	DAG	DAG 18:0-18:1	10.5439
9	B09	OSBPL8	TAG	TAG 48:4-20:4	NA
9	B09	OSBPL8	PE-P	PE-P 18:1-18:0	NA
9	B09	OSBPL8	CE	CE 18:3	17.4398
9	B09	OSBPL8	TAG	TAG 42:0-16:0	0.0689839
9	B09	OSBPL8	TAG	TAG 48:4-18:2	0.0237364
9	B09	OSBPL8	PG	PG 16:1-18:2	1.94138
9	B09	OSBPL8	CER	CER 20:1	0.0766011
9	B09	OSBPL8	PC	PC 18:0-20:2	2.52897
9	B09	OSBPL8	TAG	TAG 52:8-16:1	0.174908
9	B09	OSBPL8	PE	PE 15:0-18:1	NA
9	B09	OSBPL8	TAG	TAG 52:4-16:0	1.36989
9	B09	OSBPL8	PE	PE 18:0-20:3	11.8327
9	B09	OSBPL8	PE	PE 14:0-16:1	NA
9	B09	OSBPL8	PS	PS 20:0-22:5	NA
9	B09	OSBPL8	PC	PC 16:1-18:0	17.4557
9	B09	OSBPL8	PC	PC 18:2-20:2	3.75928
9	B09	OSBPL8	TAG	TAG 54:8-22:6	NA
9	B09	OSBPL8	PE	PE 18:1-22:6	NA
9	B09	OSBPL8	FA	FA 18:3	14.7496
9	B09	OSBPL8	TAG	TAG 52:1-16:0	13.568
9	B09	OSBPL8	PI	PI 18:0-22:6	NA
9	B09	OSBPL8	TAG	TAG 54:6-18:1	0.110819
9	B09	OSBPL8	TAG	TAG 54:6-18:3	0.137523
9	B09	OSBPL8	HCER	HCER 22:1	1.80711
9	B09	OSBPL8	PE	PE 18:0-22:4	6.22374
9	B09	OSBPL8	TAG	TAG 52:3-20:3	0.23588
9	B09	OSBPL8	TAG	TAG 48:2-16:0	1.15047
9	B09	OSBPL8	TAG	TAG 55:2-18:1	0.355156
9	B09	OSBPL8	PC	PC 18:2-20:1	5.6361
9	B09	OSBPL8	TAG	TAG 46:3-12:0	NA
9	B09	OSBPL8	TAG	TAG 44:1-14:1	0.0337307
9	B09	OSBPL8	PE-P	PE-P 16:0-18:3	0.756108
9	B09	OSBPL8	PE	PE 16:1-17:0	NA
9	B09	OSBPL8	TAG	TAG 46:0-16:0	1.84788
9	B09	OSBPL8	CER	CER 22:1	0.463088
9	B09	OSBPL8	TAG	TAG 47:1-16:0	0.562107
9	B09	OSBPL8	CER	CER 16:0	30.5903
9	B09	OSBPL8	TAG	TAG 49:2-18:2	0.593261
9	B09	OSBPL8	TAG	TAG 58:8-22:5	0.0242309
9	B09	OSBPL8	PE	PE 18:0-20:5	NA
9	B09	OSBPL8	TAG	TAG 56:8-16:1	NA
9	B09	OSBPL8	DAG	DAG 18:1-20:4	0.753147
9	B09	OSBPL8	TAG	TAG 54:5-16:0	0.451288
9	B09	OSBPL8	PE	PE 17:0-18:2	4.92399
9	B09	OSBPL8	TAG	TAG 56:4-18:2	0.180693
9	B09	OSBPL8	PG	PG 18:0-20:3	NA
9	B09	OSBPL8	PE-P	PE-P 18:1-18:3	0.32919
9	B09	OSBPL8	TAG	TAG 48:5-18:2	NA
9	B09	OSBPL8	PE-O	PE-O 18:0-22:6	NA
9	B09	OSBPL8	TAG	TAG 53:1-18:0	1.75575
9	B09	OSBPL8	CER	CER 24:0	9.83543
9	B09	OSBPL8	PG	PG 16:0-20:4	NA
9	B09	OSBPL8	TAG	TAG 56:6-20:2	NA
9	B09	OSBPL8	TAG	TAG 51:5-18:3	0.0247254
9	B09	OSBPL8	PE-P	PE-P 18:0-20:1	1.08557
9	B09	OSBPL8	DAG	DAG 16:0-18:3	0.886982
9	B09	OSBPL8	PE	PE 14:0-18:1	2.03174
9	B09	OSBPL8	PE	PE 18:0-22:6	NA
9	B09	OSBPL8	LCER	LCER 16:0	38.3581
9	B09	OSBPL8	PI	PI 18:0-18:0	3.54692
9	B09	OSBPL8	TAG	TAG 48:2-14:0	1.05034
9	B09	OSBPL8	TAG	TAG 56:4-20:3	0.180248
9	B09	OSBPL8	LPE	LPE 18:0	2.44675
9	B09	OSBPL8	PI	PI 17:0-20:0	1.70663
9	B09	OSBPL8	LPC	LPC 22:6	NA
9	B09	OSBPL8	PI	PI 18:2-20:1	1.07895
9	B09	OSBPL8	TAG	TAG 48:1-12:0	0.116605
9	B09	OSBPL8	TAG	TAG 53:3-17:0	0.355601
9	B09	OSBPL8	PE-P	PE-P 16:0-16:1	4.79623
9	B09	OSBPL8	PA	PA 34:2	6.18923
9	B09	OSBPL8	PE	PE 18:1-20:4	24.0536
9	B09	OSBPL8	FA	FA 14:0	31.3028
9	B09	OSBPL8	HCER	HCER 22:0	9.16681
9	B09	OSBPL8	TAG	TAG 52:7-16:0	1.79269
9	B09	OSBPL8	TAG	TAG 55:5-18:2	0.0459112
9	B09	OSBPL8	PS	PS 16:1-20:0	NA
9	B09	OSBPL8	PI	PI 17:0-22:1	NA
9	B09	OSBPL8	TAG	TAG 56:5-18:1	0.374738
9	B09	OSBPL8	PS	PS 16:0-18:2	4.80611
9	B09	OSBPL8	TAG	TAG 54:0-16:0	0.454404
9	B09	OSBPL8	TAG	TAG 48:1-16:0	4.55694
9	B09	OSBPL8	DAG	DAG 14:0-14:0	0.668855
9	B09	OSBPL8	TAG	TAG 53:5-20:4	0.0738795
9	B09	OSBPL8	PA	PA 36:3	6.56845
9	B09	OSBPL8	FA	FA 20:4	0.964994
9	B09	OSBPL8	CE	CE 20:3	2.34255
9	B09	OSBPL8	TAG	TAG 52:5-16:0	0.166897
9	B09	OSBPL8	PI	PI 18:1-20:2	17.3836
9	B09	OSBPL8	CE	CE 18:2	248.074
9	B09	OSBPL8	TAG	TAG 50:1-14:0	1.41884
9	B09	OSBPL8	PG	PG 16:1-18:1	5.22401
9	B09	OSBPL8	PE-P	PE-P 18:0-20:5	NA
9	B09	OSBPL8	PG	PG 16:0-18:2	1.61601
9	B09	OSBPL8	TAG	TAG 50:4-16:0	0.0801103
9	B09	OSBPL8	PC	PC 16:1-17:0	5.22696
9	B09	OSBPL8	TAG	TAG 52:2-20:1	0.335573
9	B09	OSBPL8	PE-P	PE-P 16:0-20:4	59.7349
9	B09	OSBPL8	TAG	TAG 58:6-20:4	NA
9	B09	OSBPL8	TAG	TAG 53:4-16:0	0.116605
9	B09	OSBPL8	PE-P	PE-P 18:1-20:1	0.876503
9	B09	OSBPL8	TAG	TAG 58:2-18:1	0.218523
9	B09	OSBPL8	PE-O	PE-O 18:0-22:5	NA
9	B09	OSBPL8	PE-P	PE-P 18:0-22:2	0.78464
9	B09	OSBPL8	TAG	TAG 47:1-14:0	0.375628
9	B09	OSBPL8	PE	PE 16:0-18:1	38.1367
9	B09	OSBPL8	TAG	TAG 56:6-18:1	0.213182
9	B09	OSBPL8	HCER	HCER 24:0	19.0649
9	B09	OSBPL8	PC	PC 14:0-20:2	NA
9	B09	OSBPL8	TAG	TAG 56:10-18:2	0.069874
9	B09	OSBPL8	SM	SM 26:1	1.78415
9	B09	OSBPL8	TAG	TAG 54:5-22:1	NA
9	B09	OSBPL8	SM	SM 22:1	16.0594
9	B09	OSBPL8	TAG	TAG 52:6-18:3	0.0341991
9	B09	OSBPL8	TAG	TAG 58:8-18:1	0.0956873
9	B09	OSBPL8	TAG	TAG 56:7-22:4	NA
9	B09	OSBPL8	TAG	TAG 50:3-14:0	0.488673
9	B09	OSBPL8	TAG	TAG 54:4-22:1	NA
9	B09	OSBPL8	TAG	TAG 47:2-15:0	0.0591926
9	B09	OSBPL8	DAG	DAG 12:0-16:0	1.11831
9	B09	OSBPL8	TAG	TAG 52:7-22:6	NA
9	B09	OSBPL8	PC	PC 14:0-16:1	7.41867
9	B09	OSBPL8	TAG	TAG 52:6-20:4	0.0323252
9	B09	OSBPL8	PC	PC 18:1-22:4	NA
9	B09	OSBPL8	FA	FA 20:5	0.861809
9	B09	OSBPL8	TAG	TAG 58:6-22:5	0.0743246
9	B09	OSBPL8	LPC	LPC 18:0	3.20096
9	B09	OSBPL8	TAG	TAG 56:2-20:1	0.392986
9	B09	OSBPL8	TAG	TAG 58:9-22:6	0.030709
9	B09	OSBPL8	PE-P	PE-P 18:0-20:2	1.18719
9	B09	OSBPL8	PC	PC 18:0-18:1	122.181
9	B09	OSBPL8	CE	CE 12:0	0.235623
9	B09	OSBPL8	PI	PI 18:0-18:3	1.26822
9	B09	OSBPL8	TAG	TAG 56:8-20:4	0.0645333
9	B09	OSBPL8	PC	PC 18:2-20:0	2.23278
9	B09	OSBPL8	TAG	TAG 46:2-16:1	0.146869
9	B09	OSBPL8	PA	PA 38:2	0.42844
9	B09	OSBPL8	CE	CE 22:1	0.761991
9	B09	OSBPL8	PE	PE 16:1-18:2	14.6864
9	B09	OSBPL8	TAG	TAG 46:2-14:1	0.0823356
9	B09	OSBPL8	TAG	TAG 56:3-20:2	0.142418
9	B09	OSBPL8	PA	PA 36:1	2.423
9	B09	OSBPL8	PI	PI 18:2-18:2	0.711129
9	B09	OSBPL8	PE-P	PE-P 16:0-16:0	2.84221
9	B09	OSBPL8	PE-O	PE-O 18:0-20:4	6.28845
9	B09	OSBPL8	TAG	TAG 52:8-18:2	0.0827807
9	B09	OSBPL8	PI	PI 18:0-22:4	7.48014
9	B09	OSBPL8	TAG	TAG 52:4-14:0	0.0903466
9	B09	OSBPL8	PS	PS 17:0-20:1	NA
9	B09	OSBPL8	PI	PI 15:0-18:2	NA
9	B09	OSBPL8	PE-O	PE-O 16:0-20:4	3.41928
9	B09	OSBPL8	PS	PS 16:0-18:1	18.5188
9	B09	OSBPL8	DAG	DAG 18:1-20:5	0.149765
9	B09	OSBPL8	TAG	TAG 55:1-16:0	0.211847
9	B09	OSBPL8	TAG	TAG 58:7-18:2	0.0375826
9	B09	OSBPL8	TAG	TAG 44:0-16:0	0.31243
9	B09	OSBPL8	PG	PG 18:1-18:2	2.11853
9	B09	OSBPL8	PS	PS 18:1-20:0	3.49015
9	B09	OSBPL8	TAG	TAG 52:1-18:1	18.9412
9	B09	OSBPL8	TAG	TAG 54:6-20:5	0.478437
9	B09	OSBPL8	FA	FA 18:0	362.765
9	B09	OSBPL8	TAG	TAG 48:3-18:2	0.164226
9	B09	OSBPL8	PI	PI 18:0-22:5	2.28984
9	B09	OSBPL8	TAG	TAG 48:3-16:1	0.184699
9	B09	OSBPL8	CE	CE 14:1	0.459202
9	B09	OSBPL8	DCER	DCER 24:0	0.631923
9	B09	OSBPL8	DAG	DAG 18:2-20:5	NA
9	B09	OSBPL8	PI	PI 15:0-20:0	NA
9	B09	OSBPL8	TAG	TAG 48:2-14:1	0.297298
9	B09	OSBPL8	TAG	TAG 52:6-18:1	NA
9	B09	OSBPL8	DAG	DAG 14:0-20:0	0.388857
9	B09	OSBPL8	PS	PS 16:0-18:0	1.06434
9	B09	OSBPL8	TAG	TAG 51:0-18:0	6.24326
9	B09	OSBPL8	FA	FA 20:2	1.74905
9	B09	OSBPL8	PC	PC 16:0-20:4	14.8536
9	B09	OSBPL8	LPC	LPC 20:1	NA
9	B09	OSBPL8	TAG	TAG 60:11-22:5	NA
9	B09	OSBPL8	TAG	TAG 56:8-22:6	0.0480662
9	B09	OSBPL8	LCER	LCER 22:0	2.23953
9	B09	OSBPL8	PS	PS 17:0-18:0	0.509253
9	B09	OSBPL8	TAG	TAG 51:3-16:1	0.236771
9	B09	OSBPL8	TAG	TAG 54:2-16:0	1.01785
9	B09	OSBPL8	PE-P	PE-P 18:1-22:6	NA
9	B09	OSBPL8	PC	PC 18:1-22:6	NA
9	B09	OSBPL8	PA	PA 38:5	0.241239
9	B09	OSBPL8	TAG	TAG 56:4-18:1	0.515821
9	B09	OSBPL8	TAG	TAG 53:2-18:2	0.422805
9	B09	OSBPL8	TAG	TAG 46:1-14:1	0.142418
9	B09	OSBPL8	TAG	TAG 46:0-12:0	0.211847
9	B09	OSBPL8	PE	PE 18:1-22:0	0.703151
9	B09	OSBPL8	PI	PI 15:0-22:5	NA
9	B09	OSBPL8	PE	PE 16:0-16:1	4.17449
9	B09	OSBPL8	TAG	TAG 50:4-16:1	0.144644
9	B09	OSBPL8	LCER	LCER 22:1	0.559463
9	B09	OSBPL8	TAG	TAG 48:1-18:0	0.368953
9	B09	OSBPL8	PG	PG 18:1-20:2	NA
9	B09	OSBPL8	TAG	TAG 52:2-18:1	24.9121
9	B09	OSBPL8	PC	PC 16:0-22:1	NA
9	B09	OSBPL8	TAG	TAG 56:7-18:1	0.093017
9	B09	OSBPL8	PE	PE 16:0-18:2	25.494
9	B09	OSBPL8	TAG	TAG 47:1-15:0	0.265254
9	B09	OSBPL8	TAG	TAG 52:4-18:1	1.00271
9	B09	OSBPL8	DAG	DAG 16:0-22:5	0.888997
9	B09	OSBPL8	PC	PC 18:0-20:3	10.0576
9	B09	OSBPL8	TAG	TAG 56:9-20:4	NA
9	B09	OSBPL8	PS	PS 17:0-18:2	1.93516
9	B09	OSBPL8	PE-P	PE-P 18:0-16:0	2.7978
9	B09	OSBPL8	PI	PI 18:0-18:2	70.8309
9	B09	OSBPL8	TAG	TAG 58:8-20:4	0.0356046
9	B09	OSBPL8	DAG	DAG 18:2-18:3	0.144282
9	B09	OSBPL8	CE	CE 24:0	0.544833
9	B09	OSBPL8	LPC	LPC 20:4	NA
9	B09	OSBPL8	PC	PC 16:0-16:0	25.0653
9	B09	OSBPL8	TAG	TAG 56:6-22:5	0.158885
9	B09	OSBPL8	TAG	TAG 50:5-16:1	NA
9	B09	OSBPL8	TAG	TAG 51:5-18:2	NA
9	B09	OSBPL8	TAG	TAG 45:0-16:0	0.278606
9	B09	OSBPL8	DAG	DAG 16:0-22:6	0.205103
9	B09	OSBPL8	HCER	HCER 20:0	0.96098
9	B09	OSBPL8	TAG	TAG 48:2-18:1	0.615069
9	B09	OSBPL8	TAG	TAG 52:6-20:5	0.0796653
9	B09	OSBPL8	TAG	TAG 54:2-18:2	2.90622
9	B09	OSBPL8	DAG	DAG 18:2-20:3	0.159657
9	B09	OSBPL8	PS	PS 18:1-20:1	11.8436
9	B09	OSBPL8	TAG	TAG 54:4-20:1	0.0409453
9	B09	OSBPL8	FA	FA 20:0	10.4315
9	B09	OSBPL8	DAG	DAG 16:1-20:2	0.24436
9	B09	OSBPL8	TAG	TAG 56:3-16:0	0.0912368
9	B09	OSBPL8	PE	PE 16:0-20:1	NA
9	B09	OSBPL8	TAG	TAG 46:0-18:0	0.409008
9	B09	OSBPL8	TAG	TAG 53:2-16:0	0.554987
9	B09	OSBPL8	PC	PC 18:0-20:5	NA
9	B09	OSBPL8	PS	PS 18:0-18:3	1.52147
9	B09	OSBPL8	HCER	HCER 26:1	0.656279
9	B09	OSBPL8	TAG	TAG 51:4-15:0	0.0569673
9	B09	OSBPL8	PC	PC 18:0-18:2	164.747
9	B09	OSBPL8	PG	PG 16:0-18:0	2.59153
9	B09	OSBPL8	PI	PI 17:0-20:4	1.20766
9	B09	OSBPL8	DCER	DCER 14:0	NA
9	B09	OSBPL8	TAG	TAG 52:3-14:0	0.0961324
9	B09	OSBPL8	PA	PA 38:3	0.55292
9	B09	OSBPL8	TAG	TAG 52:5-20:3	0.0257144
9	B09	OSBPL8	TAG	TAG 54:4-20:2	0.164671
9	B09	OSBPL8	DAG	DAG 12:0-18:2	0.127115
9	B09	OSBPL8	TAG	TAG 46:1-12:0	0.170902
9	B09	OSBPL8	DAG	DAG 16:1-20:4	0.086711
9	B09	OSBPL8	PI	PI 16:0-18:0	5.42833
9	B09	OSBPL8	PE-P	PE-P 18:1-16:0	3.13087
9	B09	OSBPL8	TAG	TAG 49:3-16:0	0.0743246
9	B09	OSBPL8	TAG	TAG 54:2-20:1	1.08594
9	B09	OSBPL8	TAG	TAG 50:4-20:3	NA
9	B09	OSBPL8	LCER	LCER 20:0	0.43992
9	B09	OSBPL8	PG	PG 14:0-18:1	1.24003
9	B09	OSBPL8	LPE	LPE 16:0	0.349962
9	B09	OSBPL8	TAG	TAG 42:1-18:1	0.0197803
9	B09	OSBPL8	TAG	TAG 48:0-14:0	1.65517
9	B09	OSBPL8	PE-P	PE-P 16:0-18:0	0.969997
9	B09	OSBPL8	TAG	TAG 56:3-18:1	0.898126
9	B09	OSBPL8	TAG	TAG 52:4-20:2	NA
9	B09	OSBPL8	PC	PC 18:0-22:5	NA
9	B09	OSBPL8	TAG	TAG 57:2-18:1	0.136188
9	B09	OSBPL8	TAG	TAG 49:3-16:1	0.127731
9	B09	OSBPL8	PC	PC 18:0-20:1	NA
9	B09	OSBPL8	PI	PI 15:0-20:1	2.71416
9	B09	OSBPL8	TAG	TAG 51:2-16:0	2.32943
9	B09	OSBPL8	DAG	DAG 14:0-20:4	NA
9	B09	OSBPL8	PC	PC 18:2-20:3	2.06946
9	B09	OSBPL8	TAG	TAG 52:5-20:5	NA
9	B09	OSBPL8	TAG	TAG 48:1-16:1	1.29601
9	B09	OSBPL8	PE	PE 18:2-18:2	5.97179
9	B09	OSBPL8	DAG	DAG 16:1-18:2	1.98614
9	B09	OSBPL8	TAG	TAG 53:1-17:0	0.899906
9	B09	OSBPL8	TAG	TAG 56:2-18:0	0.406782
9	B09	OSBPL8	PG	PG 15:0-18:1	NA
9	B09	OSBPL8	PA	PA 40:2	NA
9	B09	OSBPL8	TAG	TAG 51:2-16:1	0.334238
9	B09	OSBPL8	PS	PS 18:2-18:2	0.794661
9	B09	OSBPL8	DAG	DAG 14:0-16:1	1.50551
9	B09	OSBPL8	TAG	TAG 52:2-20:0	NA
9	B09	OSBPL8	TAG	TAG 58:6-22:4	0.0569673
9	B09	OSBPL8	PC	PC 16:0-18:3	4.89268
9	B09	OSBPL8	PI	PI 16:0-20:1	1.21382
9	B09	OSBPL8	PE	PE 18:1-22:1	NA
9	B09	OSBPL8	PS	PS 18:0-20:3	7.11991
9	B09	OSBPL8	PC	PC 18:1-18:1	213.302
9	B09	OSBPL8	PI	PI 18:1-18:2	23.5654
9	B09	OSBPL8	CER	CER 22:0	3.45048
9	B09	OSBPL8	HCER	HCER 24:1	41.1557
9	B09	OSBPL8	TAG	TAG 49:3-18:3	0.0445057
9	B09	OSBPL8	TAG	TAG 56:6-18:2	0.100583
9	B09	OSBPL8	TAG	TAG 44:2-16:0	NA
9	B09	OSBPL8	TAG	TAG 49:0-18:0	2.26401
9	B09	OSBPL8	TAG	TAG 54:7-22:6	0.0410442
9	B09	OSBPL8	PE	PE 18:2-20:2	0.798286
9	B09	OSBPL8	DAG	DAG 18:0-18:3	0.555842
9	B09	OSBPL8	PE	PE 16:0-22:5	NA
9	B09	OSBPL8	TAG	TAG 47:2-16:1	0.0965774
9	B09	OSBPL8	PE-P	PE-P 14:0-18:1	1.13361
9	B09	OSBPL8	TAG	TAG 52:4-22:1	NA
9	B09	OSBPL8	HCER	HCER 26:0	0.307045
9	B09	OSBPL8	PE	PE 16:0-18:3	NA
9	B09	OSBPL8	TAG	TAG 54:3-18:0	3.19418
9	B09	OSBPL8	TAG	TAG 56:1-16:0	0.222974
9	B09	OSBPL8	TAG	TAG 48:2-12:0	0.0761048
9	B09	OSBPL8	PE-O	PE-O 16:0-18:1	2.82
9	B09	OSBPL8	TAG	TAG 44:0-14:0	0.30976
9	B09	OSBPL8	PC	PC 16:0-20:2	5.90093
9	B09	OSBPL8	DAG	DAG 12:0-18:1	0.383679
9	B09	OSBPL8	PE	PE 16:0-22:6	NA
9	B09	OSBPL8	PI	PI 16:0-20:3	2.35224
9	B09	OSBPL8	TAG	TAG 58:6-16:0	0.0316485
9	B09	OSBPL8	TAG	TAG 47:2-18:1	0.0560772
9	B09	OSBPL8	PI	PI 16:0-17:0	NA
9	B09	OSBPL8	TAG	TAG 40:0-16:0	NA
9	B09	OSBPL8	SM	SM 26:0	2.79084
9	B09	OSBPL8	TAG	TAG 50:0-16:0	15.5788
9	B09	OSBPL8	TAG	TAG 48:2-18:2	0.723218
9	B09	OSBPL8	TAG	TAG 52:6-22:6	NA
9	B09	OSBPL8	TAG	TAG 58:8-22:6	0.0805554
9	B09	OSBPL8	SM	SM 20:0	19.9689
9	B09	OSBPL8	TAG	TAG 54:1-20:0	0.514041
9	B09	OSBPL8	TAG	TAG 44:1-16:1	0.0551871
9	B09	OSBPL8	PG	PG 18:1-22:4	NA
9	B09	OSBPL8	TAG	TAG 53:6-20:4	0.0309198
9	B09	OSBPL8	PE-P	PE-P 16:0-20:2	2.48697
9	B09	OSBPL8	PE	PE 18:2-20:4	2.21121
9	B09	OSBPL8	DAG	DAG 18:1-18:1	14.5214
9	B09	OSBPL8	FA	FA 20:1	3.87305
9	B09	OSBPL8	TAG	TAG 50:5-18:2	NA
9	B09	OSBPL8	PE	PE 16:0-20:2	NA
9	B09	OSBPL8	PI	PI 15:0-22:2	4.06104
9	B09	OSBPL8	PG	PG 16:0-18:1	33.1734
9	B09	OSBPL8	PE	PE 18:1-18:1	62.0456
9	B09	OSBPL8	TAG	TAG 46:2-18:2	0.0845609
9	B09	OSBPL8	PE-P	PE-P 16:0-20:3	12.0443
9	B09	OSBPL8	TAG	TAG 46:2-12:0	0.0468481
9	B09	OSBPL8	PC	PC 18:1-20:1	5.95466
9	B09	OSBPL8	PS	PS 18:0-22:6	3.15789
9	B09	OSBPL8	TAG	TAG 42:0-14:0	0.0631981
9	B09	OSBPL8	LPC	LPC 16:0	3.10737
9	B09	OSBPL8	TAG	TAG 56:2-16:0	0.206952
9	B09	OSBPL8	PC	PC 15:0-16:1	NA
9	B09	OSBPL8	TAG	TAG 48:3-18:3	0.0578575
9	B09	OSBPL8	TAG	TAG 53:1-16:0	0.687169
9	B09	OSBPL8	PI	PI 18:0-20:2	43.0861
9	B09	OSBPL8	DCER	DCER 24:1	1.18442
9	B09	OSBPL8	TAG	TAG 44:2-12:0	NA
9	B09	OSBPL8	DCER	DCER 18:0	0.555954
9	B09	OSBPL8	PC	PC 18:2-18:3	1.87651
9	B09	OSBPL8	LPE	LPE 16:1	NA
9	B09	OSBPL8	TAG	TAG 54:7-20:5	0.0974676
9	B09	OSBPL8	TAG	TAG 52:5-16:1	0.155325
9	B09	OSBPL8	TAG	TAG 56:3-18:2	0.130847
9	B09	OSBPL8	FA	FA 18:2	8.93927
9	B09	OSBPL8	TAG	TAG 48:4-12:0	NA
9	B09	OSBPL8	TAG	TAG 50:5-14:0	NA
9	B09	OSBPL8	CE	CE 16:0	19.813
9	B09	OSBPL8	TAG	TAG 54:3-16:0	0.726779
9	B09	OSBPL8	DAG	DAG 18:2-22:5	NA
9	B09	OSBPL8	TAG	TAG 48:3-14:1	0.1126
9	B09	OSBPL8	PI	PI 15:0-20:2	2.15899
9	B09	OSBPL8	TAG	TAG 54:2-18:0	10.984
9	B09	OSBPL8	TAG	TAG 51:3-17:0	0.0921269
9	B09	OSBPL8	TAG	TAG 44:2-14:0	NA
9	B09	OSBPL8	PI	PI 14:0-18:1	1.48356
9	B09	OSBPL8	TAG	TAG 56:5-16:0	0.224309
9	B09	OSBPL8	CE	CE 22:6	0.951126
9	B09	OSBPL8	PS	PS 16:0-16:0	NA
9	B09	OSBPL8	PE-P	PE-P 18:1-18:1	17.8526
9	B09	OSBPL8	TAG	TAG 58:3-18:1	0.169567
9	B09	OSBPL8	PE	PE 18:1-20:1	2.07614
9	B09	OSBPL8	PE-O	PE-O 18:0-16:1	1.56544
9	B09	OSBPL8	TAG	TAG 51:3-18:2	0.733455
9	B09	OSBPL8	TAG	TAG 49:1-18:1	1.97739
9	B09	OSBPL8	FA	FA 22:6	0.554435
9	B09	OSBPL8	TAG	TAG 58:7-22:4	0.0323252
9	B09	OSBPL8	TAG	TAG 48:1-18:1	2.43001
9	B09	OSBPL8	TAG	TAG 46:3-14:1	NA
9	B09	OSBPL8	CE	CE 22:2	0.87848
9	B09	OSBPL8	PI	PI 16:1-18:2	0.645308
9	B09	OSBPL8	TAG	TAG 46:2-16:0	0.0836708
9	B09	OSBPL8	PI	PI 16:0-20:2	3.4423
9	B09	OSBPL8	CE	CE 20:2	0.897547
9	B09	OSBPL8	TAG	TAG 58:5-18:1	0.0712092
9	B09	OSBPL8	FA	FA 18:4	0.465057
9	B09	OSBPL8	CE	CE 20:0	17.3824
9	B09	OSBPL8	PE	PE 18:1-22:2	NA
9	B09	OSBPL8	TAG	TAG 56:6-18:3	0.0425277
9	B09	OSBPL8	FA	FA 16:1	4.02129
9	B09	OSBPL8	TAG	TAG 51:3-18:3	0.0669928
9	B09	OSBPL8	SM	SM 18:1	3.32461
9	B09	OSBPL8	PG	PG 14:0-16:0	0.217739
9	B09	OSBPL8	TAG	TAG 56:7-22:6	0.121056
9	B09	OSBPL8	TAG	TAG 56:7-18:3	0.106369
9	B09	OSBPL8	TAG	TAG 51:0-16:0	2.06685
9	B09	OSBPL8	TAG	TAG 42:1-16:0	NA
9	B09	OSBPL8	TAG	TAG 48:4-16:0	NA
9	B09	OSBPL8	FA	FA 17:0	13.8657
9	B09	OSBPL8	TAG	TAG 58:10-20:5	NA
9	B09	OSBPL8	DAG	DAG 16:1-16:1	0.755409
9	B09	OSBPL8	TAG	TAG 45:1-15:0	0.0436156
9	B09	OSBPL8	PI	PI 15:0-22:1	1.59354
9	B09	OSBPL8	TAG	TAG 49:3-15:0	0.0569673
9	B09	OSBPL8	TAG	TAG 49:1-15:0	1.36989
9	B09	OSBPL8	TAG	TAG 52:6-16:1	NA
9	B09	OSBPL8	PG	PG 18:2-18:2	0.395868
9	B09	OSBPL8	TAG	TAG 50:3-14:1	0.145089
9	B09	OSBPL8	TAG	TAG 52:2-18:0	5.95086
9	B09	OSBPL8	PS	PS 18:0-22:5	9.28758
9	B09	OSBPL8	TAG	TAG 56:7-16:0	0.160221
9	B09	OSBPL8	TAG	TAG 58:10-22:5	0.0369398
9	B09	OSBPL8	TAG	TAG 52:4-20:0	NA
9	B09	OSBPL8	PG	PG 16:1-18:0	0.954485
9	B09	OSBPL8	TAG	TAG 53:2-17:0	0.808224
9	B09	OSBPL8	TAG	TAG 57:10-22:6	0.562553
9	B09	OSBPL8	TAG	TAG 56:6-16:0	0.162446
9	B09	OSBPL8	PI	PI 18:0-20:1	4.37712
9	B09	OSBPL8	PE-P	PE-P 16:0-22:5	NA
9	B09	OSBPL8	TAG	TAG 44:1-18:1	0.0556322
9	B09	OSBPL8	DCER	DCER 16:0	3.68449
9	B09	OSBPL8	PC	PC 18:1-22:5	NA
9	B09	OSBPL8	TAG	TAG 50:2-14:0	1.42374
9	B09	OSBPL8	PI	PI 16:0-22:4	NA
9	B09	OSBPL8	TAG	TAG 46:1-14:0	0.649784
9	B09	OSBPL8	PE-O	PE-O 18:0-22:4	0.895269
9	B09	OSBPL8	TAG	TAG 50:5-18:3	NA
9	B09	OSBPL8	TAG	TAG 50:4-20:4	0.03701
9	B09	OSBPL8	DAG	DAG 16:0-20:4	0.506021
9	B09	OSBPL8	TAG	TAG 56:6-18:0	0.19093
9	B09	OSBPL8	PG	PG 14:0-18:2	NA
9	B09	OSBPL8	PE-P	PE-P 18:0-18:2	53.5158
9	B09	OSBPL8	PC	PC 14:0-14:0	0.80388
9	B09	OSBPL8	DAG	DAG 18:1-22:5	0.185983
9	B09	OSBPL8	TAG	TAG 56:4-20:1	0.173572
9	B09	OSBPL8	PC	PC 18:1-20:2	5.46804
9	B09	OSBPL8	TAG	TAG 53:4-18:2	0.567893
9	B09	OSBPL8	TAG	TAG 56:4-16:0	0.11705
9	B09	OSBPL8	TAG	TAG 54:4-18:1	4.84133
9	B09	OSBPL8	TAG	TAG 54:3-20:1	0.334683
9	B09	OSBPL8	TAG	TAG 52:0-20:0	0.326672
9	B09	OSBPL8	TAG	TAG 45:0-14:0	0.201166
9	B09	OSBPL8	DCER	DCER 26:1	NA
9	B09	OSBPL8	PE-P	PE-P 18:0-16:1	3.07536
9	B09	OSBPL8	PE-P	PE-P 18:2-18:2	1.65798
9	B09	OSBPL8	TAG	TAG 49:1-17:0	0.412568
9	B09	OSBPL8	TAG	TAG 54:1-16:0	0.711647
9	B09	OSBPL8	TAG	TAG 52:5-22:5	0.0494014
9	B09	OSBPL8	TAG	TAG 46:1-18:0	0.0479673
9	B09	OSBPL8	TAG	TAG 51:1-16:0	3.16436
9	B09	OSBPL8	TAG	TAG 54:3-20:2	0.449063
9	B09	OSBPL8	TAG	TAG 56:2-20:0	0.326672
9	B09	OSBPL8	PS	PS 18:0-18:1	97.2856
9	B09	OSBPL8	TAG	TAG 40:0-12:0	NA
9	B09	OSBPL8	TAG	TAG 51:4-20:4	0.0556322
9	B09	OSBPL8	SM	SM 24:0	25.5599
9	B09	OSBPL8	HCER	HCER 18:1	0.251656
9	B09	OSBPL8	TAG	TAG 48:2-18:0	0.0511816
9	B09	OSBPL8	PI	PI 17:0-20:2	1.1092
9	B09	OSBPL8	PC	PC 16:1-18:1	91.0107
9	B09	OSBPL8	TAG	TAG 55:4-18:1	0.135297
9	B09	OSBPL8	PE	PE 18:0-18:3	1.22932
9	B09	OSBPL8	DAG	DAG 14:1-18:1	0.306678
9	B09	OSBPL8	CE	CE 22:0	0.287097
9	B09	OSBPL8	DAG	DAG 14:0-18:1	5.87201
9	B09	OSBPL8	DAG	DAG 16:1-20:0	NA
9	B09	OSBPL8	TAG	TAG 54:7-18:3	0.0939071
9	B09	OSBPL8	PA	PA 36:0	0.712137
9	B09	OSBPL8	PC	PC 16:0-18:0	20.437
9	B09	OSBPL8	PI	PI 18:1-18:3	NA
9	B09	OSBPL8	TAG	TAG 50:0-14:0	1.63025
9	B09	OSBPL8	PC	PC 14:0-20:4	NA
9	B09	OSBPL8	TAG	TAG 53:1-18:1	1.54969
9	B09	OSBPL8	PI	PI 16:0-16:1	1.26522
9	B09	OSBPL8	TAG	TAG 45:1-16:0	0.0912368
9	B09	OSBPL8	LCER	LCER 24:1	16.2672
9	B09	OSBPL8	PE	PE 18:0-22:5	NA
9	B09	OSBPL8	DAG	DAG 14:0-18:2	1.57698
9	B09	OSBPL8	TAG	TAG 56:4-18:0	0.399216
9	B09	OSBPL8	PE	PE 18:2-20:3	0.54865
9	B09	OSBPL8	PE	PE 18:1-22:4	2.38379
9	B09	OSBPL8	PA	PA 32:0	2.13352
9	B09	OSBPL8	TAG	TAG 56:1-18:1	0.310205
9	B09	OSBPL8	PS	PS 17:0-22:1	1.18977
9	B09	OSBPL8	CE	CE 14:0	3.90518
9	B09	OSBPL8	PG	PG 14:0-18:0	NA
9	B09	OSBPL8	DAG	DAG 15:0-18:2	0.537025
9	B09	OSBPL8	TAG	TAG 58:7-22:6	0.0894565
9	B09	OSBPL8	PC	PC 12:0-18:0	1.22524
9	B09	OSBPL8	PE-P	PE-P 16:0-22:4	21.9179
9	B09	OSBPL8	DAG	DAG 14:0-18:3	0.0893552
9	B09	OSBPL8	DAG	DAG 18:1-20:3	0.697759
9	B09	OSBPL8	TAG	TAG 56:7-20:3	NA
9	B09	OSBPL8	TAG	TAG 54:4-22:4	0.124171
9	B09	OSBPL8	PG	PG 18:0-18:1	8.57895
9	B09	OSBPL8	TAG	TAG 56:3-20:1	0.480217
9	B09	OSBPL8	PE	PE 18:1-22:5	NA
9	B09	OSBPL8	LPC	LPC 15:0	NA
9	B09	OSBPL8	TAG	TAG 56:6-20:3	0.0649784
9	B09	OSBPL8	TAG	TAG 47:0-16:0	1.60176
9	B09	OSBPL8	SM	SM 20:1	1.45506
9	B09	OSBPL8	PE-O	PE-O 16:0-22:5	NA
9	B09	OSBPL8	TAG	TAG 51:3-15:0	0.283502
9	B09	OSBPL8	DAG	DAG 16:0-16:0	37.7935
9	B09	OSBPL8	DAG	DAG 18:1-22:4	0.234518
9	B09	OSBPL8	TAG	TAG 54:5-18:2	1.06413
9	B09	OSBPL8	TAG	TAG 54:5-18:0	0.0876763
9	B09	OSBPL8	TAG	TAG 51:2-15:0	0.732564
9	B09	OSBPL8	TAG	TAG 50:2-18:2	3.5609
9	B09	OSBPL8	PI	PI 17:0-18:0	NA
9	B09	OSBPL8	TAG	TAG 54:4-18:0	0.736125
9	B09	OSBPL8	PE-P	PE-P 18:1-16:1	2.64237
9	B09	OSBPL8	DAG	DAG 16:1-22:6	0.0406677
9	B09	OSBPL8	FA	FA 18:1	28.2515
9	B09	OSBPL8	TAG	TAG 56:6-20:4	0.229205
9	B09	OSBPL8	CER	CER 18:0	4.10353
9	B09	OSBPL8	PI	PI 15:0-22:4	1.61021
9	B09	OSBPL8	DAG	DAG 16:0-16:1	12.2777
9	B09	OSBPL8	TAG	TAG 54:5-20:5	0.0814455
9	B09	OSBPL8	PE-O	PE-O 16:0-22:6	NA
9	B09	OSBPL8	FA	FA 22:4	0.510836
9	B09	OSBPL8	TAG	TAG 49:1-16:1	0.414348
9	B09	OSBPL8	PA	PA 40:4	NA
9	B09	OSBPL8	TAG	TAG 51:1-15:0	1.02541
9	B09	OSBPL8	PE	PE 16:1-18:1	12.4347
9	B09	OSBPL8	TAG	TAG 46:1-18:1	0.335573
9	B09	OSBPL8	LPC	LPC 20:2	NA
9	B09	OSBPL8	LPC	LPC 18:2	1.40393
9	B09	OSBPL8	PI	PI 18:1-20:1	8.04312
9	B09	OSBPL8	FA	FA 15:0	8.86822
9	B09	OSBPL8	PC	PC 18:0-22:4	3.88772
9	B09	OSBPL8	PE-O	PE-O 18:0-18:0	NA
9	B09	OSBPL8	PI	PI 18:0-18:1	92.5081
9	B09	OSBPL8	DAG	DAG 16:0-18:0	54.0567
9	B09	OSBPL8	PC	PC 18:2-20:4	2.49843
9	B09	OSBPL8	TAG	TAG 46:3-14:0	NA
9	B09	OSBPL8	PE-P	PE-P 16:1-18:1	1.8763
9	B09	OSBPL8	PS	PS 16:1-17:0	0.409689
9	B09	OSBPL8	TAG	TAG 49:1-14:0	0.339579
9	B09	OSBPL8	TAG	TAG 44:1-14:0	0.0894565
9	B09	OSBPL8	PC	PC 18:2-18:2	22.3734
9	B09	OSBPL8	DAG	DAG 18:1-18:2	11.3954
9	B09	OSBPL8	PE-P	PE-P 18:1-20:2	0.726645
9	B09	OSBPL8	PE	PE 18:2-20:1	2.03174
9	B09	OSBPL8	TAG	TAG 53:3-16:0	0.245672
9	B09	OSBPL8	PC	PC 16:0-18:1	600.587
9	B09	OSBPL8	CE	CE 20:5	0.697747
9	B09	OSBPL8	TAG	TAG 56:6-22:4	0.0631981
9	B09	OSBPL8	TAG	TAG 54:7-16:1	NA
9	B09	OSBPL8	TAG	TAG 46:0-14:0	1.02274
9	B09	OSBPL8	PE-O	PE-O 18:0-20:2	NA
9	B09	OSBPL8	DAG	DAG 16:1-18:1	6.46147
9	B09	OSBPL8	TAG	TAG 45:0-15:0	0.142863
9	B09	OSBPL8	PG	PG 16:0-16:0	1.3329
9	B09	OSBPL8	SM	SM 18:0	9.74745
9	B09	OSBPL8	PS	PS 16:1-18:0	9.38412
9	B09	OSBPL8	TAG	TAG 51:2-18:2	0.993368
9	B09	OSBPL8	TAG	TAG 54:8-18:3	NA
9	B09	OSBPL8	PE	PE 17:0-18:1	5.78018
9	B09	OSBPL8	CE	CE 20:4	9.88901
9	B09	OSBPL8	PG	PG 18:0-20:2	NA
9	B09	OSBPL8	TAG	TAG 46:1-16:1	0.336908
9	B09	OSBPL8	PE-P	PE-P 18:1-18:2	31.4299
9	B09	OSBPL8	TAG	TAG 44:2-18:2	NA
9	B09	OSBPL8	TAG	TAG 55:4-18:2	0.0841158
9	B09	OSBPL8	PI	PI 15:0-22:0	1.43933
9	B09	OSBPL8	TAG	TAG 50:3-20:3	0.0520014
9	B09	OSBPL8	TAG	TAG 54:1-18:1	9.86292
9	B09	OSBPL8	PE-P	PE-P 16:0-22:2	1.37141
9	B09	OSBPL8	PI	PI 18:2-20:2	0.917947
9	B09	OSBPL8	LPC	LPC 22:5	NA
9	B09	OSBPL8	PA	PA 36:5	0.119011
9	B09	OSBPL8	LPC	LPC 18:1	3.59406
9	B09	OSBPL8	PI	PI 18:1-20:0	0.774369
9	B09	OSBPL8	PE-P	PE-P 18:0-22:6	NA
9	B09	OSBPL8	CER	CER 20:0	0.327942
9	B09	OSBPL8	HCER	HCER 20:1	0.204779
9	B09	OSBPL8	TAG	TAG 55:5-18:1	0.0952423
9	B09	OSBPL8	PC	PC 16:1-20:0	NA
9	B09	OSBPL8	TAG	TAG 46:3-16:1	NA
9	B09	OSBPL8	PE	PE 18:0-20:2	1.40212
9	B09	OSBPL8	PE-O	PE-O 16:0-22:4	2.24356
9	B09	OSBPL8	TAG	TAG 54:5-20:3	0.202056
9	B09	OSBPL8	PS	PS 16:0-20:1	NA
9	B09	OSBPL8	TAG	TAG 56:8-18:1	0.384975
9	B09	OSBPL8	FA	FA 22:1	6.61907
9	B09	OSBPL8	PE-P	PE-P 18:1-20:5	NA
9	B09	OSBPL8	PE-O	PE-O 16:0-18:0	NA
9	B09	OSBPL8	PC	PC 18:1-20:0	1.90879
9	B09	OSBPL8	PC	PC 18:1-20:4	12.1738
9	B09	OSBPL8	PG	PG 18:0-20:4	NA
9	B09	OSBPL8	DAG	DAG 12:0-18:0	0.881972
9	B09	OSBPL8	PS	PS 18:0-20:0	NA
9	B09	OSBPL8	TAG	TAG 56:3-18:0	0.445057
9	B09	OSBPL8	PE-O	PE-O 18:0-20:1	NA
9	B09	OSBPL8	TAG	TAG 54:6-18:2	0.393876
9	B09	OSBPL8	TAG	TAG 50:4-14:1	0.0520717
9	B09	OSBPL8	CE	CE 24:1	0.566436
9	B09	OSBPL8	TAG	TAG 46:3-18:1	NA
9	B09	OSBPL8	SM	SM 16:0	122.686
9	B09	OSBPL8	DAG	DAG 14:1-16:0	0.381024
9	B09	OSBPL8	PA	PA 38:4	0.460284
9	B09	OSBPL8	PE	PE 18:0-18:0	2.89217
9	B09	OSBPL8	TAG	TAG 54:8-20:4	NA
9	B09	OSBPL8	PE	PE 18:0-18:2	192.469
9	B09	OSBPL8	TAG	TAG 49:0-15:0	1.59731
9	B09	OSBPL8	PE	PE 16:1-18:0	4.99607
9	B09	OSBPL8	TAG	TAG 58:7-16:0	0.0979126
9	B09	OSBPL8	DAG	DAG 18:0-18:2	8.87085
9	B09	OSBPL8	TAG	TAG 46:1-16:0	0.673372
9	B09	OSBPL8	PA	PA 34:3	1.34322
9	B09	OSBPL8	TAG	TAG 47:1-18:1	0.236771
9	B09	OSBPL8	TAG	TAG 54:6-22:5	0.0571547
9	B09	OSBPL8	CE	CE 16:1	8.66082
9	B09	OSBPL8	SM	SM 22:0	70.0981
9	B09	OSBPL8	PS	PS 16:1-18:2	NA
9	B09	OSBPL8	LPE	LPE 20:4	0.468611
9	B09	OSBPL8	TAG	TAG 52:6-18:2	0.0341991
9	B09	OSBPL8	TAG	TAG 51:2-17:0	0.712537
9	B09	OSBPL8	PE-O	PE-O 16:0-18:2	3.35689
9	B09	OSBPL8	TAG	TAG 53:4-20:4	0.0814455
9	B09	OSBPL8	TAG	TAG 44:0-12:0	0.101028
9	B09	OSBPL8	TAG	TAG 50:2-14:1	0.110819
9	B09	OSBPL8	PC	PC 16:0-20:3	12.2926
9	B09	OSBPL8	TAG	TAG 42:1-14:0	NA
9	B09	OSBPL8	TAG	TAG 60:11-22:6	NA
9	B09	OSBPL8	TAG	TAG 57:3-18:2	0.0431706
9	B09	OSBPL8	PE-P	PE-P 18:0-18:3	0.47321
9	B09	OSBPL8	PE-P	PE-P 16:0-18:2	61.1405
9	B09	OSBPL8	TAG	TAG 58:8-20:3	NA
9	B09	OSBPL8	PC	PC 14:0-16:0	14.8191
9	B09	OSBPL8	TAG	TAG 52:3-20:0	NA
9	B09	OSBPL8	PE-O	PE-O 16:0-20:3	0.668342
9	B09	OSBPL8	TAG	TAG 49:2-14:0	0.226979
9	B09	OSBPL8	CER	CER 14:0	1.17568
9	B09	OSBPL8	PC	PC 16:0-22:4	3.93092
9	B09	OSBPL8	PS	PS 18:1-20:3	NA
9	B09	OSBPL8	DAG	DAG 18:0-22:6	0.144332
9	B09	OSBPL8	TAG	TAG 54:4-18:2	2.82255
9	B09	OSBPL8	TAG	TAG 54:7-22:5	NA
9	B09	OSBPL8	PA	PA 34:5	0.493651
9	B09	OSBPL8	PE-P	PE-P 18:0-22:4	9.99896
9	B09	OSBPL8	TAG	TAG 36:0-12:0	0.0337307
9	B09	OSBPL8	TAG	TAG 45:1-18:1	0.0507365
9	B09	OSBPL8	CE	CE 15:0	4.26731
9	B09	OSBPL8	TAG	TAG 56:7-18:2	0.069429
9	B09	OSBPL8	TAG	TAG 49:2-18:1	0.404557
9	B09	OSBPL8	TAG	TAG 48:3-14:0	0.123726
9	B09	OSBPL8	TAG	TAG 56:8-18:3	0.173572
9	B09	OSBPL8	TAG	TAG 56:5-18:0	0.226979
9	B09	OSBPL8	TAG	TAG 56:8-16:0	0.180693
9	B09	OSBPL8	PE-P	PE-P 18:1-22:4	3.90467
9	B09	OSBPL8	PE-P	PE-P 16:0-22:1	NA
9	B09	OSBPL8	DAG	DAG 14:0-16:0	10.0456
9	B09	OSBPL8	TAG	TAG 52:2-16:0	14.9446
9	B09	OSBPL8	PE	PE 16:0-16:0	0.37193
9	B09	OSBPL8	CER	CER 26:1	0.262732
9	B09	OSBPL8	TAG	TAG 54:4-16:1	0.109039
9	B09	OSBPL8	CE	CE 17:0	2.60671
9	B09	OSBPL8	TAG	TAG 60:10-22:6	NA
9	B09	OSBPL8	TAG	TAG 49:3-18:2	0.126841
9	B09	OSBPL8	TAG	TAG 54:7-20:4	0.0332622
9	B09	OSBPL8	TAG	TAG 54:6-16:1	0.0783301
9	B09	OSBPL8	TAG	TAG 53:4-17:0	0.0881214
9	B09	OSBPL8	PC	PC 14:0-18:2	19.5938
9	B09	OSBPL8	DCER	DCER 22:0	0.625199
9	B09	OSBPL8	LCER	LCER 18:0	2.1305
9	B09	OSBPL8	TAG	TAG 56:5-20:1	0.0364947
9	B09	OSBPL8	TAG	TAG 56:9-18:3	0.0445057
9	B09	OSBPL8	TAG	TAG 46:3-18:3	NA
9	B09	OSBPL8	LPE	LPE 18:1	2.04892
9	B09	OSBPL8	TAG	TAG 56:4-20:4	0.227424
9	B09	OSBPL8	FA	FA 22:2	0.845096
9	B09	OSBPL8	TAG	TAG 50:2-18:0	0.689394
9	B09	OSBPL8	PE-P	PE-P 18:1-20:4	28.6162
9	B09	OSBPL8	TAG	TAG 58:8-18:2	0.030165
9	B09	OSBPL8	TAG	TAG 55:7-15:0	0.0440373
9	B09	OSBPL8	PC	PC 16:0-16:1	93.988
9	B09	OSBPL8	TAG	TAG 52:1-18:0	19.194
9	B09	OSBPL8	TAG	TAG 54:3-18:3	0.237661
9	B09	OSBPL8	TAG	TAG 51:0-17:0	1.86568
9	B09	OSBPL8	TAG	TAG 42:1-16:1	NA
9	B09	OSBPL8	TAG	TAG 52:3-16:0	5.87698
9	B09	OSBPL8	CER	CER 26:0	0.118135
9	B09	OSBPL8	PG	PG 18:1-20:3	NA
9	B09	OSBPL8	TAG	TAG 48:1-14:1	0.161111
9	B09	OSBPL8	TAG	TAG 42:2-12:0	NA
9	B09	OSBPL8	TAG	TAG 46:2-14:0	0.125951
9	B09	OSBPL8	TAG	TAG 56:7-18:0	1.18608
9	B09	OSBPL8	PG	PG 18:1-20:4	0.599288
9	B09	OSBPL8	TAG	TAG 56:5-20:4	0.294628
9	B09	OSBPL8	TAG	TAG 52:4-16:1	0.685388
9	B09	OSBPL8	PS	PS 18:0-20:2	1.51677
9	B09	OSBPL8	TAG	TAG 58:10-20:4	NA
9	B09	OSBPL8	TAG	TAG 54:8-18:2	0.046731
9	B09	OSBPL8	CE	CE 18:1	42.2534
9	B09	OSBPL8	PE	PE 18:0-20:4	67.6413
9	B09	OSBPL8	TAG	TAG 54:5-20:4	0.532289
9	B09	OSBPL8	PG	PG 17:0-18:1	1.26654
9	B09	OSBPL8	TAG	TAG 50:3-16:0	1.33206
9	B09	OSBPL8	PI	PI 17:0-18:2	1.24453
9	B09	OSBPL8	CE	CE 22:4	0.341927
9	B09	OSBPL8	PE-P	PE-P 18:1-22:5	NA
9	B09	OSBPL8	DCER	DCER 20:0	0.400563
9	B09	OSBPL8	PE-P	PE-P 16:0-20:1	2.93103
9	B09	OSBPL8	TAG	TAG 56:6-22:6	0.161111
9	B09	OSBPL8	PI	PI 16:0-18:1	28.4206
9	B09	OSBPL8	PE	PE 16:0-18:0	1.54323
9	B09	OSBPL8	TAG	TAG 55:3-18:2	0.0872312
9	B09	OSBPL8	TAG	TAG 50:4-18:3	0.0583025
9	B09	OSBPL8	DAG	DAG 18:2-22:6	NA
9	B09	OSBPL8	TAG	TAG 52:6-16:0	0.202501
9	B09	OSBPL8	TAG	TAG 58:9-18:2	0.0370881
9	B09	OSBPL8	TAG	TAG 46:3-18:2	NA
9	B09	OSBPL8	DAG	DAG 18:2-22:4	0.259735
9	B09	OSBPL8	PC	PC 14:0-18:1	50.7249
9	B09	OSBPL8	DAG	DAG 16:0-20:5	0.114689
9	B09	OSBPL8	DAG	DAG 16:0-20:3	0.66228
9	B09	OSBPL8	TAG	TAG 56:8-18:2	0.0309198
9	B09	OSBPL8	FA	FA 24:0	18.0486
9	B09	OSBPL8	TAG	TAG 44:1-16:0	0.0827807
9	B09	OSBPL8	PG	PG 16:0-20:3	0.192698
9	B09	OSBPL8	PG	PG 18:1-18:1	4.19006
9	B09	OSBPL8	TAG	TAG 52:4-22:4	NA
9	B09	OSBPL8	TAG	TAG 58:7-22:5	0.0721461
9	B09	OSBPL8	DAG	DAG 15:0-18:1	1.37275
9	B09	OSBPL8	PE	PE 18:0-20:1	NA
9	B09	OSBPL8	FA	FA 16:0	296.304
9	B09	OSBPL8	FA	FA 22:0	3.58085
9	B09	OSBPL8	TAG	TAG 56:4-20:2	0.171347
9	B09	OSBPL8	DAG	DAG 18:2-20:4	0.163689
9	B09	OSBPL8	TAG	TAG 54:2-20:0	0.137968
9	B09	OSBPL8	TAG	TAG 52:3-18:1	8.30744
9	B09	OSBPL8	PC	PC 14:1-18:1	NA
9	B09	OSBPL8	DAG	DAG 16:1-18:3	0.106438
9	B09	OSBPL8	TAG	TAG 54:4-16:0	0.655124
9	B09	OSBPL8	TAG	TAG 58:10-22:6	NA
9	B09	OSBPL8	DCER	DCER 18:1	NA
9	B09	OSBPL8	PE-O	PE-O 16:0-16:0	NA
9	B09	OSBPL8	DAG	DAG 18:1-20:1	2.26888
9	B09	OSBPL8	TAG	TAG 56:7-22:5	0.0565223
9	B09	OSBPL8	TAG	TAG 52:2-20:2	0.19449
9	B09	OSBPL8	TAG	TAG 44:2-16:1	NA
9	B09	OSBPL8	TAG	TAG 54:2-18:1	11.2969
9	B09	OSBPL8	DCER	DCER 22:1	NA
9	B09	OSBPL8	PE-P	PE-P 18:0-18:0	1.13244
9	B09	OSBPL8	DAG	DAG 18:1-22:6	0.140879
9	B09	OSBPL8	PA	PA 32:1	2.66907
9	B09	OSBPL8	CER	CER 24:1	14.1573
9	B09	OSBPL8	PE-P	PE-P 18:1-22:2	NA
9	B09	OSBPL8	TAG	TAG 44:0-18:0	0.0787752
9	B09	OSBPL8	PE	PE 18:1-20:3	4.29055
9	B09	OSBPL8	TAG	TAG 56:5-22:5	0.19093
9	B09	OSBPL8	TAG	TAG 52:7-20:5	NA
9	B09	OSBPL8	PG	PG 18:0-18:0	0.506615
9	B09	OSBPL8	TAG	TAG 47:0-14:0	0.334238
9	B09	OSBPL8	TAG	TAG 50:3-16:1	1.47091
9	B09	OSBPL8	PC	PC 15:0-18:1	7.62098
9	B09	OSBPL8	TAG	TAG 54:5-20:2	NA
9	B09	OSBPL8	PG	PG 16:0-16:1	0.963378
9	B09	OSBPL8	PE-O	PE-O 18:0-16:0	1.16575
9	B09	OSBPL8	TAG	TAG 40:0-14:0	NA
9	B09	OSBPL8	TAG	TAG 42:0-12:0	0.0276404
9	B09	OSBPL8	PI	PI 15:0-18:1	0.907559
9	B09	OSBPL8	PC	PC 14:0-20:3	NA
9	B09	OSBPL8	PC	PC 14:0-20:1	NA
9	B09	OSBPL8	TAG	TAG 54:5-22:5	0.183809
9	B09	OSBPL8	LPE	LPE 18:2	1.15458
9	B09	OSBPL8	PC	PC 17:0-20:4	NA
9	B09	OSBPL8	TAG	TAG 52:0-16:0	17.0012
9	B09	OSBPL8	TAG	TAG 56:9-20:5	0.0480662
9	B09	OSBPL8	TAG	TAG 54:5-16:1	0.0903466
9	B09	OSBPL8	CE	CE 20:1	4.76525
9	B09	OSBPL8	TAG	TAG 50:1-16:1	1.57995
9	B09	OSBPL8	DAG	DAG 16:0-18:2	14.3874
9	B09	OSBPL8	TAG	TAG 50:1-18:1	11.0294
9	B09	OSBPL8	PI	PI 18:1-18:1	75.6127
9	B09	OSBPL8	TAG	TAG 51:4-18:2	0.182919
9	B09	OSBPL8	PE-O	PE-O 18:0-18:2	14.9013
9	B09	OSBPL8	PC	PC 18:1-18:3	4.84253
9	B09	OSBPL8	DAG	DAG 20:0-20:0	7.39532
9	B09	OSBPL8	TAG	TAG 50:5-20:5	NA
9	B09	OSBPL8	TAG	TAG 55:5-20:4	0.0562178
9	B09	OSBPL8	TAG	TAG 56:7-20:4	0.109929
9	B09	OSBPL8	TAG	TAG 53:3-18:2	0.539855
9	B09	OSBPL8	PG	PG 16:0-20:1	NA
9	B09	OSBPL8	PC	PC 16:0-22:6	NA
10	B10	OSBPL9	TAG	TAG 50:1-20:1	0.288086
10	B10	OSBPL9	TAG	TAG 56:6-20:5	0.27754
10	B10	OSBPL9	PG	PG 17:0-20:0	0.836453
10	B10	OSBPL9	TAG	TAG 50:1-18:0	3.03665
10	B10	OSBPL9	TAG	TAG 49:1-16:0	5.37249
10	B10	OSBPL9	TAG	TAG 56:9-22:6	NA
10	B10	OSBPL9	PE-O	PE-O 18:0-20:5	NA
10	B10	OSBPL9	TAG	TAG 44:1-12:0	0.0589594
10	B10	OSBPL9	PG	PG 16:1-18:2	2.01495
10	B10	OSBPL9	PI	PI 18:1-22:4	1.46467
10	B10	OSBPL9	TAG	TAG 47:1-16:0	0.785166
10	B10	OSBPL9	PE-O	PE-O 16:0-16:1	0.644654
10	B10	OSBPL9	TAG	TAG 48:4-14:1	NA
10	B10	OSBPL9	TAG	TAG 50:1-16:0	19.7945
10	B10	OSBPL9	TAG	TAG 49:2-18:2	0.689776
10	B10	OSBPL9	TAG	TAG 54:3-18:2	2.30469
10	B10	OSBPL9	SM	SM 24:1	36.4641
10	B10	OSBPL9	PE	PE 18:0-18:1	127.008
10	B10	OSBPL9	TAG	TAG 50:2-20:2	0.073819
10	B10	OSBPL9	PE	PE 18:1-20:2	1.66983
10	B10	OSBPL9	TAG	TAG 51:4-18:3	0.0627941
10	B10	OSBPL9	PI	PI 16:0-20:2	4.24421
10	B10	OSBPL9	TAG	TAG 56:3-20:0	0.0642321
10	B10	OSBPL9	PC	PC 18:1-20:3	8.68759
10	B10	OSBPL9	TAG	TAG 54:1-18:0	16.2244
10	B10	OSBPL9	LPE	LPE 20:3	0.294712
10	B10	OSBPL9	PI	PI 18:0-20:5	NA
10	B10	OSBPL9	TAG	TAG 51:5-18:3	NA
10	B10	OSBPL9	PA	PA 36:2	10.8568
10	B10	OSBPL9	CE	CE 18:0	7.87232
10	B10	OSBPL9	LPC	LPC 16:1	NA
10	B10	OSBPL9	CE	CE 22:5	1.64531
10	B10	OSBPL9	PI	PI 18:2-20:1	1.23496
10	B10	OSBPL9	PA	PA 40:5	0.149098
10	B10	OSBPL9	PE-P	PE-P 18:2-18:2	1.36622
10	B10	OSBPL9	PS	PS 18:0-20:4	5.81768
10	B10	OSBPL9	TAG	TAG 53:4-18:3	0.0356845
10	B10	OSBPL9	TAG	TAG 52:4-18:2	2.00893
10	B10	OSBPL9	FA	FA 18:3	11.9168
10	B10	OSBPL9	SM	SM 22:1	15.4211
10	B10	OSBPL9	TAG	TAG 48:5-18:3	NA
10	B10	OSBPL9	FA	FA 12:0	3.11897
10	B10	OSBPL9	PA	PA 28:0	NA
10	B10	OSBPL9	PE-P	PE-P 18:0-20:3	9.75304
10	B10	OSBPL9	TAG	TAG 56:6-18:2	0.0817408
10	B10	OSBPL9	TAG	TAG 50:3-18:3	0.194614
10	B10	OSBPL9	PS	PS 18:2-20:0	NA
10	B10	OSBPL9	TAG	TAG 47:1-14:0	0.509064
10	B10	OSBPL9	PC	PC 18:0-18:3	1.96428
10	B10	OSBPL9	TAG	TAG 52:8-16:1	0.165374
10	B10	OSBPL9	TAG	TAG 56:5-22:4	0.1462
10	B10	OSBPL9	TAG	TAG 48:2-16:1	0.88487
10	B10	OSBPL9	PS	PS 17:0-18:1	3.31886
10	B10	OSBPL9	TAG	TAG 54:7-20:5	0.0685462
10	B10	OSBPL9	PG	PG 18:1-22:5	NA
10	B10	OSBPL9	TAG	TAG 54:0-16:0	0.480303
10	B10	OSBPL9	TAG	TAG 42:2-18:2	NA
10	B10	OSBPL9	PS	PS 18:1-18:2	11.3417
10	B10	OSBPL9	PS	PS 18:0-18:0	2.63603
10	B10	OSBPL9	LPC	LPC 22:5	NA
10	B10	OSBPL9	CE	CE 18:2	236.416
10	B10	OSBPL9	PS	PS 18:1-20:4	NA
10	B10	OSBPL9	PG	PG 16:0-18:2	1.71558
10	B10	OSBPL9	TAG	TAG 52:7-18:1	0.253094
10	B10	OSBPL9	PE-P	PE-P 16:0-22:6	7.54086
10	B10	OSBPL9	TAG	TAG 51:1-18:1	3.61138
10	B10	OSBPL9	FA	FA 20:3	1.21548
10	B10	OSBPL9	TAG	TAG 58:2-18:1	0.313491
10	B10	OSBPL9	PA	PA 34:4	2.431
10	B10	OSBPL9	PI	PI 16:0-18:2	6.11245
10	B10	OSBPL9	PC	PC 16:0-18:2	298.129
10	B10	OSBPL9	TAG	TAG 50:5-20:4	NA
10	B10	OSBPL9	TAG	TAG 50:4-18:2	0.151473
10	B10	OSBPL9	TAG	TAG 49:0-16:0	4.30595
10	B10	OSBPL9	PI	PI 17:0-20:3	0.82887
10	B10	OSBPL9	PC	PC 18:2-20:2	2.36321
10	B10	OSBPL9	TAG	TAG 52:5-16:0	0.143324
10	B10	OSBPL9	TAG	TAG 52:1-16:0	12.9955
10	B10	OSBPL9	TAG	TAG 48:3-16:0	0.0848439
10	B10	OSBPL9	TAG	TAG 49:2-16:1	0.739628
10	B10	OSBPL9	TAG	TAG 48:2-16:0	1.0675
10	B10	OSBPL9	TAG	TAG 54:8-20:5	NA
10	B10	OSBPL9	PA	PA 36:4	1.80062
10	B10	OSBPL9	TAG	TAG 47:2-18:2	0.0752571
10	B10	OSBPL9	PC	PC 16:0-16:0	52.0305
10	B10	OSBPL9	LPC	LPC 18:0	2.65765
10	B10	OSBPL9	TAG	TAG 53:0-16:0	0.692173
10	B10	OSBPL9	DAG	DAG 16:0-22:6	0.139025
10	B10	OSBPL9	PS	PS 17:0-20:0	1.69119
10	B10	OSBPL9	TAG	TAG 51:1-17:0	1.63456
10	B10	OSBPL9	TAG	TAG 58:7-18:2	NA
10	B10	OSBPL9	PS	PS 16:1-20:0	NA
10	B10	OSBPL9	PE	PE 14:0-16:1	NA
10	B10	OSBPL9	TAG	TAG 56:8-16:1	NA
10	B10	OSBPL9	PE-P	PE-P 16:0-20:5	NA
10	B10	OSBPL9	DAG	DAG 18:1-20:2	1.28488
10	B10	OSBPL9	TAG	TAG 48:0-18:0	2.08131
10	B10	OSBPL9	PC	PC 14:1-16:0	1.8185
10	B10	OSBPL9	TAG	TAG 56:1-18:1	0.341293
10	B10	OSBPL9	PE-O	PE-O 18:0-18:1	12.6782
10	B10	OSBPL9	TAG	TAG 46:4-18:2	NA
10	B10	OSBPL9	PE-O	PE-O 16:0-20:4	4.37695
10	B10	OSBPL9	SM	SM 14:0	8.43013
10	B10	OSBPL9	PE	PE 18:0-20:2	1.97343
10	B10	OSBPL9	PE	PE 18:0-18:3	2.08263
10	B10	OSBPL9	TAG	TAG 53:6-20:4	NA
10	B10	OSBPL9	PA	PA 32:2	0.93932
10	B10	OSBPL9	PC	PC 16:0-20:5	NA
10	B10	OSBPL9	PE-P	PE-P 18:0-22:2	0.75635
10	B10	OSBPL9	TAG	TAG 51:4-16:1	0.0797225
10	B10	OSBPL9	HCER	HCER 22:0	16.0657
10	B10	OSBPL9	PC	PC 16:1-18:2	33.699
10	B10	OSBPL9	TAG	TAG 50:3-18:0	0.0503312
10	B10	OSBPL9	PC	PC 12:0-18:1	NA
10	B10	OSBPL9	TAG	TAG 46:2-16:1	0.152911
10	B10	OSBPL9	PG	PG 18:1-20:2	NA
10	B10	OSBPL9	DAG	DAG 14:0-16:1	2.02816
10	B10	OSBPL9	LPC	LPC 20:1	NA
10	B10	OSBPL9	TAG	TAG 56:7-16:1	NA
10	B10	OSBPL9	PI	PI 18:1-18:2	19.7345
10	B10	OSBPL9	PE	PE 16:0-20:3	1.81341
10	B10	OSBPL9	DAG	DAG 16:0-20:4	0.47141
10	B10	OSBPL9	TAG	TAG 44:2-16:0	NA
10	B10	OSBPL9	PS	PS 17:0-18:0	NA
10	B10	OSBPL9	TAG	TAG 54:5-18:3	0.278978
10	B10	OSBPL9	TAG	TAG 54:5-18:1	1.02628
10	B10	OSBPL9	PE-P	PE-P 18:1-20:3	6.42505
10	B10	OSBPL9	TAG	TAG 47:2-14:0	0.105456
10	B10	OSBPL9	TAG	TAG 54:6-22:6	0.0656702
10	B10	OSBPL9	PC	PC 18:0-20:2	2.58248
10	B10	OSBPL9	TAG	TAG 49:2-16:0	1.19836
10	B10	OSBPL9	TAG	TAG 50:3-18:2	1.13413
10	B10	OSBPL9	FA	FA 22:5	0.855262
10	B10	OSBPL9	LPE	LPE 17:0	0.196474
10	B10	OSBPL9	TAG	TAG 54:4-22:1	NA
10	B10	OSBPL9	PE	PE 16:1-18:2	14.229
10	B10	OSBPL9	TAG	TAG 48:0-14:0	1.67291
10	B10	OSBPL9	LPC	LPC 20:3	NA
10	B10	OSBPL9	TAG	TAG 47:2-15:0	0.05848
10	B10	OSBPL9	TAG	TAG 53:1-18:0	1.44331
10	B10	OSBPL9	TAG	TAG 54:6-18:3	0.132299
10	B10	OSBPL9	PI	PI 18:0-20:4	95.7891
10	B10	OSBPL9	LCER	LCER 24:0	7.27235
10	B10	OSBPL9	DAG	DAG 16:0-18:1	61.6513
10	B10	OSBPL9	LCER	LCER 22:0	2.33273
10	B10	OSBPL9	LCER	LCER 16:0	40.2698
10	B10	OSBPL9	TAG	TAG 49:1-18:1	2.6177
10	B10	OSBPL9	TAG	TAG 50:3-18:1	0.9213
10	B10	OSBPL9	PS	PS 18:2-20:2	NA
10	B10	OSBPL9	TAG	TAG 54:0-18:0	27.2685
10	B10	OSBPL9	TAG	TAG 54:4-20:4	0.291441
10	B10	OSBPL9	FA	FA 20:5	0.862986
10	B10	OSBPL9	LPE	LPE 16:1	0.227173
10	B10	OSBPL9	PI	PI 16:1-18:2	NA
10	B10	OSBPL9	TAG	TAG 48:4-20:4	NA
10	B10	OSBPL9	TAG	TAG 53:2-18:2	0.347045
10	B10	OSBPL9	TAG	TAG 54:7-18:1	0.119836
10	B10	OSBPL9	PE-P	PE-P 14:0-18:1	0.907291
10	B10	OSBPL9	PS	PS 17:0-20:3	0.598461
10	B10	OSBPL9	TAG	TAG 50:3-14:0	0.457774
10	B10	OSBPL9	TAG	TAG 56:7-18:1	0.0829266
10	B10	OSBPL9	TAG	TAG 52:5-18:1	0.0762157
10	B10	OSBPL9	PE-P	PE-P 18:1-18:3	NA
10	B10	OSBPL9	TAG	TAG 56:3-20:2	0.177837
10	B10	OSBPL9	PC	PC 15:0-18:2	1.62014
10	B10	OSBPL9	TAG	TAG 52:4-18:3	0.40936
10	B10	OSBPL9	TAG	TAG 50:5-18:1	NA
10	B10	OSBPL9	TAG	TAG 40:0-16:0	0.0338064
10	B10	OSBPL9	TAG	TAG 52:8-18:2	0.0819679
10	B10	OSBPL9	HCER	HCER 26:1	0.789004
10	B10	OSBPL9	TAG	TAG 47:0-15:0	0.684504
10	B10	OSBPL9	PI	PI 15:0-22:1	1.44349
10	B10	OSBPL9	TAG	TAG 48:2-14:0	0.95773
10	B10	OSBPL9	PS	PS 16:0-18:1	23.0445
10	B10	OSBPL9	TAG	TAG 52:3-14:0	0.0968276
10	B10	OSBPL9	PI	PI 18:2-20:4	NA
10	B10	OSBPL9	PC	PC 18:1-22:6	NA
10	B10	OSBPL9	LPC	LPC 22:6	NA
10	B10	OSBPL9	TAG	TAG 48:4-16:1	NA
10	B10	OSBPL9	CER	CER 18:1	0.194986
10	B10	OSBPL9	TAG	TAG 58:9-22:6	NA
10	B10	OSBPL9	PG	PG 16:0-18:1	42.5633
10	B10	OSBPL9	DAG	DAG 18:2-20:5	NA
10	B10	OSBPL9	TAG	TAG 52:6-20:5	0.0733397
10	B10	OSBPL9	PE	PE 18:1-22:6	2.42871
10	B10	OSBPL9	TAG	TAG 54:4-18:0	0.638487
10	B10	OSBPL9	CER	CER 26:0	0.131359
10	B10	OSBPL9	TAG	TAG 52:4-20:2	NA
10	B10	OSBPL9	TAG	TAG 52:0-18:0	43.2417
10	B10	OSBPL9	TAG	TAG 49:3-16:1	0.162018
10	B10	OSBPL9	DAG	DAG 16:0-18:3	0.754602
10	B10	OSBPL9	PI	PI 17:0-20:4	0.760175
10	B10	OSBPL9	TAG	TAG 52:3-16:1	1.83733
10	B10	OSBPL9	PC	PC 16:1-17:0	3.81074
10	B10	OSBPL9	TAG	TAG 52:2-18:2	4.06676
10	B10	OSBPL9	PS	PS 18:1-18:1	44.103
10	B10	OSBPL9	TAG	TAG 52:1-20:1	0.859464
10	B10	OSBPL9	CE	CE 18:3	17.217
10	B10	OSBPL9	TAG	TAG 52:4-20:3	0.1021
10	B10	OSBPL9	PI	PI 18:1-20:3	10.5212
10	B10	OSBPL9	CE	CE 14:1	0.445758
10	B10	OSBPL9	TAG	TAG 52:5-20:4	0.0834059
10	B10	OSBPL9	TAG	TAG 54:8-22:6	NA
10	B10	OSBPL9	PE	PE 17:0-18:2	NA
10	B10	OSBPL9	TAG	TAG 52:5-18:3	0.156266
10	B10	OSBPL9	TAG	TAG 49:0-17:0	0.902126
10	B10	OSBPL9	PA	PA 36:3	7.31484
10	B10	OSBPL9	PG	PG 18:0-20:3	NA
10	B10	OSBPL9	TAG	TAG 48:4-18:3	NA
10	B10	OSBPL9	TAG	TAG 52:4-20:4	0.211391
10	B10	OSBPL9	TAG	TAG 48:4-14:0	NA
10	B10	OSBPL9	TAG	TAG 60:12-22:6	NA
10	B10	OSBPL9	TAG	TAG 49:3-18:3	0.0640808
10	B10	OSBPL9	HCER	HCER 24:1	70.2729
10	B10	OSBPL9	PG	PG 16:0-20:2	0.923713
10	B10	OSBPL9	SM	SM 24:0	25.9053
10	B10	OSBPL9	PC	PC 17:0-18:2	4.86043
10	B10	OSBPL9	PG	PG 18:1-20:1	NA
10	B10	OSBPL9	TAG	TAG 58:6-22:5	0.0757364
10	B10	OSBPL9	PE-P	PE-P 16:0-18:3	1.18164
10	B10	OSBPL9	PE	PE 18:2-20:2	0.852225
10	B10	OSBPL9	DAG	DAG 18:0-18:3	0.398945
10	B10	OSBPL9	TAG	TAG 53:3-17:0	0.293359
10	B10	OSBPL9	DAG	DAG 16:1-20:0	NA
10	B10	OSBPL9	PE-O	PE-O 18:0-20:3	0.971229
10	B10	OSBPL9	CER	CER 16:0	42.2638
10	B10	OSBPL9	TAG	TAG 56:1-16:0	0.313971
10	B10	OSBPL9	PC	PC 18:0-18:1	151.603
10	B10	OSBPL9	PI	PI 17:0-22:1	0.882841
10	B10	OSBPL9	TAG	TAG 52:3-18:2	5.09543
10	B10	OSBPL9	TAG	TAG 56:7-22:6	0.135175
10	B10	OSBPL9	TAG	TAG 48:1-18:0	0.354715
10	B10	OSBPL9	TAG	TAG 50:2-16:0	8.08222
10	B10	OSBPL9	TAG	TAG 54:4-20:1	0.0489436
10	B10	OSBPL9	DAG	DAG 16:1-20:2	0.244347
10	B10	OSBPL9	PE	PE 16:0-20:1	NA
10	B10	OSBPL9	CER	CER 24:0	11.7413
10	B10	OSBPL9	PG	PG 16:0-20:4	NA
10	B10	OSBPL9	PI	PI 18:0-22:4	6.29809
10	B10	OSBPL9	PC	PC 18:0-18:2	150.951
10	B10	OSBPL9	TAG	TAG 54:6-16:0	0.144283
10	B10	OSBPL9	PG	PG 14:0-18:0	NA
10	B10	OSBPL9	PS	PS 16:1-18:2	NA
10	B10	OSBPL9	DCER	DCER 14:0	NA
10	B10	OSBPL9	PE	PE 18:1-20:4	33.9763
10	B10	OSBPL9	TAG	TAG 52:4-16:0	1.17871
10	B10	OSBPL9	PG	PG 14:0-18:1	1.80002
10	B10	OSBPL9	DCER	DCER 16:0	4.08813
10	B10	OSBPL9	PI	PI 18:2-20:2	0.7005
10	B10	OSBPL9	TAG	TAG 42:1-18:1	NA
10	B10	OSBPL9	PC	PC 16:0-20:4	13.7529
10	B10	OSBPL9	PI	PI 18:1-20:2	18.886
10	B10	OSBPL9	TAG	TAG 48:4-18:1	NA
10	B10	OSBPL9	TAG	TAG 47:1-18:1	0.279937
10	B10	OSBPL9	FA	FA 14:1	1.20144
10	B10	OSBPL9	TAG	TAG 57:2-18:1	0.170647
10	B10	OSBPL9	PE-O	PE-O 18:0-18:3	NA
10	B10	OSBPL9	PE	PE 18:1-18:2	106.1
10	B10	OSBPL9	TAG	TAG 51:4-15:0	0.0680669
10	B10	OSBPL9	HCER	HCER 16:0	114.865
10	B10	OSBPL9	PE-O	PE-O 16:0-20:2	NA
10	B10	OSBPL9	DAG	DAG 14:0-20:4	NA
10	B10	OSBPL9	PE-P	PE-P 18:1-22:6	3.91112
10	B10	OSBPL9	CER	CER 20:1	0.071297
10	B10	OSBPL9	TAG	TAG 53:1-17:0	0.829745
10	B10	OSBPL9	PI	PI 18:0-20:3	56.0675
10	B10	OSBPL9	DCER	DCER 24:0	0.751689
10	B10	OSBPL9	TAG	TAG 58:9-20:4	NA
10	B10	OSBPL9	LCER	LCER 14:0	1.61711
10	B10	OSBPL9	TAG	TAG 56:7-22:4	NA
10	B10	OSBPL9	PS	PS 18:2-18:2	0.672572
10	B10	OSBPL9	TAG	TAG 52:2-14:0	0.196052
10	B10	OSBPL9	DAG	DAG 12:0-16:0	1.10101
10	B10	OSBPL9	CE	CE 18:4	0.63632
10	B10	OSBPL9	PI	PI 16:0-20:1	2.86911
10	B10	OSBPL9	TAG	TAG 58:10-18:2	0.0500649
10	B10	OSBPL9	PI	PI 16:0-16:0	0.522579
10	B10	OSBPL9	PE-O	PE-O 18:0-20:2	NA
10	B10	OSBPL9	PE	PE 18:1-20:1	2.57862
10	B10	OSBPL9	TAG	TAG 56:5-20:4	0.244945
10	B10	OSBPL9	TAG	TAG 52:3-20:3	0.205159
10	B10	OSBPL9	PC	PC 18:0-18:0	3.23121
10	B10	OSBPL9	TAG	TAG 54:7-22:6	NA
10	B10	OSBPL9	TAG	TAG 56:6-22:5	0.150993
10	B10	OSBPL9	PC	PC 18:1-18:2	264.592
10	B10	OSBPL9	TAG	TAG 54:3-18:0	2.80129
10	B10	OSBPL9	TAG	TAG 45:0-16:0	0.382996
10	B10	OSBPL9	PC	PC 14:0-20:4	NA
10	B10	OSBPL9	PE-P	PE-P 18:0-16:1	3.8142
10	B10	OSBPL9	PE-O	PE-O 16:0-22:2	NA
10	B10	OSBPL9	PG	PG 14:0-16:0	NA
10	B10	OSBPL9	TAG	TAG 51:2-18:1	3.09081
10	B10	OSBPL9	PE-P	PE-P 16:0-22:2	2.11512
10	B10	OSBPL9	PS	PS 18:1-20:1	10.8107
10	B10	OSBPL9	TAG	TAG 52:2-16:1	1.21274
10	B10	OSBPL9	TAG	TAG 48:5-18:2	NA
10	B10	OSBPL9	PA	PA 34:1	13.0849
10	B10	OSBPL9	TAG	TAG 58:8-22:6	0.0771744
10	B10	OSBPL9	PC	PC 16:0-22:5	2.30261
10	B10	OSBPL9	PE-P	PE-P 16:0-22:4	28.882
10	B10	OSBPL9	TAG	TAG 52:5-20:3	NA
10	B10	OSBPL9	CE	CE 22:2	0.780912
10	B10	OSBPL9	FA	FA 20:1	3.43088
10	B10	OSBPL9	TAG	TAG 52:5-14:0	0.0378149
10	B10	OSBPL9	DAG	DAG 16:1-18:0	2.66418
10	B10	OSBPL9	SM	SM 26:1	2.06224
10	B10	OSBPL9	TAG	TAG 56:6-16:0	0.114084
10	B10	OSBPL9	PI	PI 18:0-20:1	6.28709
10	B10	OSBPL9	LCER	LCER 20:0	NA
10	B10	OSBPL9	TAG	TAG 48:2-14:1	0.254532
10	B10	OSBPL9	TAG	TAG 54:4-20:3	0.391145
10	B10	OSBPL9	PC	PC 18:1-22:5	1.83356
10	B10	OSBPL9	FA	FA 20:2	1.36224
10	B10	OSBPL9	TAG	TAG 50:2-14:0	1.47542
10	B10	OSBPL9	TAG	TAG 54:6-18:1	0.100662
10	B10	OSBPL9	TAG	TAG 47:0-17:0	0.179275
10	B10	OSBPL9	TAG	TAG 52:3-20:1	0.0771744
10	B10	OSBPL9	PG	PG 14:0-18:2	NA
10	B10	OSBPL9	TAG	TAG 55:3-18:1	0.378682
10	B10	OSBPL9	PC	PC 18:1-22:4	NA
10	B10	OSBPL9	TAG	TAG 52:5-20:5	0.0383475
10	B10	OSBPL9	TAG	TAG 56:4-18:1	0.574254
10	B10	OSBPL9	TAG	TAG 48:0-16:0	7.20359
10	B10	OSBPL9	PE-P	PE-P 18:1-18:0	0.927397
10	B10	OSBPL9	DAG	DAG 16:1-18:2	1.51687
10	B10	OSBPL9	TAG	TAG 58:8-20:3	NA
10	B10	OSBPL9	PC	PC 18:2-20:4	1.8686
10	B10	OSBPL9	TAG	TAG 56:5-16:0	0.188382
10	B10	OSBPL9	PI	PI 17:0-20:1	NA
10	B10	OSBPL9	TAG	TAG 46:2-14:1	0.0776538
10	B10	OSBPL9	PI	PI 18:1-20:4	16.4409
10	B10	OSBPL9	PC	PC 16:0-18:3	4.66516
10	B10	OSBPL9	PE	PE 18:1-22:1	NA
10	B10	OSBPL9	TAG	TAG 46:0-14:0	1.18734
10	B10	OSBPL9	TAG	TAG 52:4-18:1	0.947184
10	B10	OSBPL9	DAG	DAG 18:2-22:6	NA
10	B10	OSBPL9	TAG	TAG 55:7-22:6	0.0660991
10	B10	OSBPL9	HCER	HCER 18:1	0.442498
10	B10	OSBPL9	TAG	TAG 46:3-14:1	NA
10	B10	OSBPL9	TAG	TAG 44:1-14:1	0.0340867
10	B10	OSBPL9	PC	PC 16:0-22:2	NA
10	B10	OSBPL9	PC	PC 18:2-18:3	NA
10	B10	OSBPL9	LPC	LPC 20:4	NA
10	B10	OSBPL9	PE-P	PE-P 18:0-22:5	6.08213
10	B10	OSBPL9	TAG	TAG 54:6-20:3	NA
10	B10	OSBPL9	TAG	TAG 48:3-16:1	0.201325
10	B10	OSBPL9	PE	PE 18:0-22:5	5.18337
10	B10	OSBPL9	SM	SM 18:1	2.6734
10	B10	OSBPL9	DAG	DAG 18:2-20:3	0.135711
10	B10	OSBPL9	TAG	TAG 50:3-16:0	1.05647
10	B10	OSBPL9	DAG	DAG 14:0-18:2	1.27252
10	B10	OSBPL9	TAG	TAG 51:1-18:0	1.71653
10	B10	OSBPL9	PC	PC 16:0-20:2	5.76308
10	B10	OSBPL9	FA	FA 20:0	8.10004
10	B10	OSBPL9	PE-P	PE-P 18:0-22:6	6.27467
10	B10	OSBPL9	PI	PI 16:0-17:0	NA
10	B10	OSBPL9	TAG	TAG 53:2-16:0	0.798588
10	B10	OSBPL9	PC	PC 18:0-20:5	NA
10	B10	OSBPL9	SM	SM 26:0	3.99619
10	B10	OSBPL9	TAG	TAG 50:4-18:3	0.0522485
10	B10	OSBPL9	PE	PE 18:0-22:6	6.86556
10	B10	OSBPL9	PS	PS 17:0-20:1	NA
10	B10	OSBPL9	FA	FA 24:1	32.2942
10	B10	OSBPL9	TAG	TAG 56:5-18:2	0.138051
10	B10	OSBPL9	PC	PC 18:2-20:1	4.77054
10	B10	OSBPL9	TAG	TAG 58:7-18:0	0.152431
10	B10	OSBPL9	TAG	TAG 58:6-18:0	0.0747777
10	B10	OSBPL9	TAG	TAG 51:0-17:0	1.61299
10	B10	OSBPL9	TAG	TAG 54:6-20:5	0.382517
10	B10	OSBPL9	FA	FA 14:0	29.0532
10	B10	OSBPL9	TAG	TAG 49:3-16:0	0.0973069
10	B10	OSBPL9	PE-P	PE-P 18:0-20:4	63.1657
10	B10	OSBPL9	PE-P	PE-P 18:0-18:1	23.9704
10	B10	OSBPL9	TAG	TAG 48:3-12:0	0.0335541
10	B10	OSBPL9	PS	PS 20:0-22:5	NA
10	B10	OSBPL9	DAG	DAG 14:0-20:0	0.507559
10	B10	OSBPL9	PG	PG 18:1-20:0	NA
10	B10	OSBPL9	TAG	TAG 56:7-20:4	0.0742984
10	B10	OSBPL9	PE	PE 18:2-22:5	NA
10	B10	OSBPL9	TAG	TAG 46:2-12:0	0.0575213
10	B10	OSBPL9	TAG	TAG 54:7-20:4	0.0420758
10	B10	OSBPL9	TAG	TAG 42:0-14:0	0.070943
10	B10	OSBPL9	TAG	TAG 53:2-18:1	1.98401
10	B10	OSBPL9	FA	FA 18:1	21.6308
10	B10	OSBPL9	TAG	TAG 56:2-16:0	0.275623
10	B10	OSBPL9	PS	PS 18:0-20:1	1.63541
10	B10	OSBPL9	TAG	TAG 50:4-16:0	0.0746768
10	B10	OSBPL9	DAG	DAG 16:0-16:1	17.1208
10	B10	OSBPL9	TAG	TAG 51:2-16:0	3.43354
10	B10	OSBPL9	PI	PI 17:0-20:0	1.76305
10	B10	OSBPL9	TAG	TAG 51:1-15:0	0.911713
10	B10	OSBPL9	DAG	DAG 18:0-18:1	12.3454
10	B10	OSBPL9	TAG	TAG 42:0-16:0	0.0848439
10	B10	OSBPL9	PE	PE 16:0-20:4	11.0668
10	B10	OSBPL9	TAG	TAG 46:0-12:0	0.21906
10	B10	OSBPL9	TAG	TAG 52:4-18:0	0.0508105
10	B10	OSBPL9	TAG	TAG 54:6-18:2	0.41655
10	B10	OSBPL9	TAG	TAG 54:5-22:1	NA
10	B10	OSBPL9	PE	PE 18:0-20:5	NA
10	B10	OSBPL9	TAG	TAG 44:2-14:0	NA
10	B10	OSBPL9	PC	PC 14:0-16:0	35.6694
10	B10	OSBPL9	TAG	TAG 52:3-18:0	0.591511
10	B10	OSBPL9	SM	SM 16:0	99.2731
10	B10	OSBPL9	TAG	TAG 51:2-16:1	0.382517
10	B10	OSBPL9	TAG	TAG 52:5-22:5	NA
10	B10	OSBPL9	PE	PE 16:0-22:4	1.38682
10	B10	OSBPL9	PS	PS 17:0-18:2	1.46887
10	B10	OSBPL9	PE-P	PE-P 18:2-20:4	NA
10	B10	OSBPL9	PI	PI 17:0-20:2	0.760175
10	B10	OSBPL9	TAG	TAG 49:0-18:0	2.08179
10	B10	OSBPL9	TAG	TAG 52:2-20:1	0.413195
10	B10	OSBPL9	TAG	TAG 48:1-12:0	0.121274
10	B10	OSBPL9	CER	CER 22:1	0.584959
10	B10	OSBPL9	PS	PS 18:0-18:2	79.9441
10	B10	OSBPL9	TAG	TAG 56:6-18:3	0.0335541
10	B10	OSBPL9	TAG	TAG 51:5-18:2	0.0287607
10	B10	OSBPL9	TAG	TAG 48:2-18:1	0.679231
10	B10	OSBPL9	TAG	TAG 58:8-22:5	NA
10	B10	OSBPL9	DAG	DAG 18:1-20:4	0.7766
10	B10	OSBPL9	TAG	TAG 49:1-14:0	0.409839
10	B10	OSBPL9	TAG	TAG 44:0-14:0	0.357591
10	B10	OSBPL9	TAG	TAG 46:1-18:0	0.0459161
10	B10	OSBPL9	TAG	TAG 42:1-16:0	NA
10	B10	OSBPL9	TAG	TAG 47:2-18:1	0.0522485
10	B10	OSBPL9	TAG	TAG 48:4-16:0	NA
10	B10	OSBPL9	PC	PC 16:0-16:1	168.058
10	B10	OSBPL9	TAG	TAG 47:1-16:1	0.548849
10	B10	OSBPL9	TAG	TAG 50:0-16:0	14.5596
10	B10	OSBPL9	TAG	TAG 48:3-18:1	0.0992243
10	B10	OSBPL9	TAG	TAG 60:10-22:5	NA
10	B10	OSBPL9	TAG	TAG 44:2-18:1	NA
10	B10	OSBPL9	TAG	TAG 52:3-18:3	0.232482
10	B10	OSBPL9	TAG	TAG 49:2-15:0	0.499956
10	B10	OSBPL9	TAG	TAG 54:5-20:3	0.149076
10	B10	OSBPL9	TAG	TAG 52:6-16:1	0.0227058
10	B10	OSBPL9	PI	PI 17:0-18:1	2.62253
10	B10	OSBPL9	FA	FA 22:1	5.42228
10	B10	OSBPL9	PE-P	PE-P 16:0-20:2	2.95509
10	B10	OSBPL9	TAG	TAG 54:4-20:2	0.163936
10	B10	OSBPL9	TAG	TAG 50:2-18:1	5.56854
10	B10	OSBPL9	PE-P	PE-P 18:1-20:1	1.34303
10	B10	OSBPL9	TAG	TAG 42:1-16:1	NA
10	B10	OSBPL9	TAG	TAG 56:3-18:0	0.421823
10	B10	OSBPL9	PG	PG 16:1-18:0	1.20448
10	B10	OSBPL9	TAG	TAG 45:1-16:0	0.110249
10	B10	OSBPL9	TAG	TAG 54:2-20:1	1.46392
10	B10	OSBPL9	TAG	TAG 44:2-18:2	NA
10	B10	OSBPL9	PC	PC 14:0-18:2	15.97
10	B10	OSBPL9	TAG	TAG 51:3-15:0	0.257408
10	B10	OSBPL9	DAG	DAG 18:1-22:4	0.26795
10	B10	OSBPL9	TAG	TAG 48:1-16:0	4.70285
10	B10	OSBPL9	DAG	DAG 14:0-14:0	0.861913
10	B10	OSBPL9	TAG	TAG 56:4-18:0	0.323078
10	B10	OSBPL9	TAG	TAG 51:0-18:0	5.32695
10	B10	OSBPL9	TAG	TAG 53:4-17:0	0.05848
10	B10	OSBPL9	PE	PE 16:1-18:0	7.25236
10	B10	OSBPL9	PS	PS 18:0-22:6	NA
10	B10	OSBPL9	TAG	TAG 56:3-18:1	1.26211
10	B10	OSBPL9	PA	PA 32:0	3.3828
10	B10	OSBPL9	PS	PS 17:0-22:1	1.12063
10	B10	OSBPL9	TAG	TAG 54:2-20:2	0.187903
10	B10	OSBPL9	DCER	DCER 24:1	1.33853
10	B10	OSBPL9	PC	PC 14:0-14:0	1.56244
10	B10	OSBPL9	PI	PI 16:1-18:0	6.76124
10	B10	OSBPL9	TAG	TAG 58:6-20:4	NA
10	B10	OSBPL9	PE-P	PE-P 16:0-18:1	39.8933
10	B10	OSBPL9	LPC	LPC 20:2	NA
10	B10	OSBPL9	CER	CER 26:1	0.317109
10	B10	OSBPL9	TAG	TAG 45:0-14:0	0.311574
10	B10	OSBPL9	TAG	TAG 38:0-12:0	NA
10	B10	OSBPL9	TAG	TAG 54:3-16:0	0.707033
10	B10	OSBPL9	PI	PI 14:0-18:1	1.83374
10	B10	OSBPL9	PA	PA 40:2	NA
10	B10	OSBPL9	PI	PI 16:1-18:1	11.5388
10	B10	OSBPL9	PE-P	PE-P 18:1-18:1	20.1669
10	B10	OSBPL9	TAG	TAG 56:2-20:0	0.297673
10	B10	OSBPL9	PS	PS 18:0-18:1	93.2822
10	B10	OSBPL9	TAG	TAG 52:7-22:6	NA
10	B10	OSBPL9	PE-P	PE-P 18:0-20:1	1.24633
10	B10	OSBPL9	PI	PI 18:0-18:2	65.3284
10	B10	OSBPL9	TAG	TAG 56:5-18:0	0.224812
10	B10	OSBPL9	TAG	TAG 50:6-20:4	NA
10	B10	OSBPL9	TAG	TAG 52:4-22:1	NA
10	B10	OSBPL9	FA	FA 18:4	0.471166
10	B10	OSBPL9	TAG	TAG 50:5-16:1	NA
10	B10	OSBPL9	TAG	TAG 56:2-20:1	0.457294
10	B10	OSBPL9	PE-P	PE-P 18:0-20:2	1.43706
10	B10	OSBPL9	PE	PE 15:0-18:1	NA
10	B10	OSBPL9	TAG	TAG 55:4-18:2	0.0992243
10	B10	OSBPL9	PI	PI 18:0-18:3	1.05545
10	B10	OSBPL9	TAG	TAG 50:3-20:3	0.0426616
10	B10	OSBPL9	PS	PS 18:2-20:1	3.22835
10	B10	OSBPL9	TAG	TAG 54:5-16:0	0.35088
10	B10	OSBPL9	PE-O	PE-O 16:0-18:1	3.55634
10	B10	OSBPL9	PC	PC 18:1-22:2	NA
10	B10	OSBPL9	TAG	TAG 54:7-18:2	0.0601843
10	B10	OSBPL9	PI	PI 18:0-20:0	NA
10	B10	OSBPL9	LCER	LCER 18:1	NA
10	B10	OSBPL9	TAG	TAG 54:1-20:0	0.57042
10	B10	OSBPL9	TAG	TAG 44:1-16:1	0.0690256
10	B10	OSBPL9	TAG	TAG 49:1-15:0	1.42174
10	B10	OSBPL9	TAG	TAG 46:2-18:1	0.113605
10	B10	OSBPL9	PA	PA 38:3	0.802011
10	B10	OSBPL9	PS	PS 18:1-20:2	2.85572
10	B10	OSBPL9	PI	PI 16:0-20:4	3.10418
10	B10	OSBPL9	LPC	LPC 18:2	1.30518
10	B10	OSBPL9	PI	PI 18:1-20:1	8.63228
10	B10	OSBPL9	FA	FA 18:0	307.992
10	B10	OSBPL9	TAG	TAG 48:3-18:2	0.136613
10	B10	OSBPL9	PA	PA 30:0	0.908113
10	B10	OSBPL9	TAG	TAG 55:5-18:2	0.0580539
10	B10	OSBPL9	PE-P	PE-P 16:0-22:5	11.7769
10	B10	OSBPL9	TAG	TAG 52:6-18:1	0.0213042
10	B10	OSBPL9	PS	PS 18:1-20:3	NA
10	B10	OSBPL9	PE-P	PE-P 16:0-18:0	1.20335
10	B10	OSBPL9	PG	PG 18:0-18:2	2.57529
10	B10	OSBPL9	TAG	TAG 46:1-14:0	0.737232
10	B10	OSBPL9	PE-P	PE-P 18:0-20:5	NA
10	B10	OSBPL9	TAG	TAG 50:4-20:4	0.0249259
10	B10	OSBPL9	PI	PI 15:0-22:4	1.07345
10	B10	OSBPL9	PC	PC 18:0-20:1	1.54736
10	B10	OSBPL9	HCER	HCER 22:1	3.21455
10	B10	OSBPL9	PI	PI 15:0-20:1	2.23687
10	B10	OSBPL9	TAG	TAG 56:5-20:2	0.0704636
10	B10	OSBPL9	DAG	DAG 18:1-22:5	0.185722
10	B10	OSBPL9	PG	PG 18:0-20:2	0.309534
10	B10	OSBPL9	TAG	TAG 56:3-18:2	0.149076
10	B10	OSBPL9	PE-O	PE-O 18:0-22:5	0.562745
10	B10	OSBPL9	FA	FA 18:2	5.70947
10	B10	OSBPL9	PE	PE 18:1-22:0	0.870849
10	B10	OSBPL9	PE	PE 16:0-18:1	54.6989
10	B10	OSBPL9	TAG	TAG 56:2-18:0	0.429972
10	B10	OSBPL9	CE	CE 16:0	22.589
10	B10	OSBPL9	PC	PC 14:0-20:2	NA
10	B10	OSBPL9	PI	PI 15:0-20:2	1.87324
10	B10	OSBPL9	HCER	HCER 18:0	14.6586
10	B10	OSBPL9	TAG	TAG 49:2-17:0	0.089158
10	B10	OSBPL9	PG	PG 15:0-18:1	NA
10	B10	OSBPL9	TAG	TAG 56:5-20:3	0.134216
10	B10	OSBPL9	TAG	TAG 49:1-17:0	0.412236
10	B10	OSBPL9	TAG	TAG 54:1-16:0	0.905961
10	B10	OSBPL9	PC	PC 18:2-18:2	19.2565
10	B10	OSBPL9	TAG	TAG 42:1-12:0	NA
10	B10	OSBPL9	CER	CER 22:0	4.83361
10	B10	OSBPL9	TAG	TAG 50:5-16:0	NA
10	B10	OSBPL9	CE	CE 16:1	9.29168
10	B10	OSBPL9	TAG	TAG 56:9-20:4	NA
10	B10	OSBPL9	TAG	TAG 48:2-18:0	0.0522485
10	B10	OSBPL9	TAG	TAG 51:3-18:2	0.8331
10	B10	OSBPL9	PC	PC 16:1-18:1	100.986
10	B10	OSBPL9	CE	CE 24:0	0.831829
10	B10	OSBPL9	LPE	LPE 18:0	2.60144
10	B10	OSBPL9	TAG	TAG 52:6-14:0	NA
10	B10	OSBPL9	PE-P	PE-P 18:1-20:5	NA
10	B10	OSBPL9	PA	PA 38:1	0.225381
10	B10	OSBPL9	PE	PE 17:0-18:1	6.32391
10	B10	OSBPL9	TAG	TAG 50:2-16:1	3.43067
10	B10	OSBPL9	TAG	TAG 47:2-16:1	0.148117
10	B10	OSBPL9	TAG	TAG 56:3-20:1	0.651429
10	B10	OSBPL9	TAG	TAG 58:5-18:1	0.0711448
10	B10	OSBPL9	PE	PE 18:1-22:2	NA
10	B10	OSBPL9	TAG	TAG 40:0-14:0	NA
10	B10	OSBPL9	TAG	TAG 50:0-14:0	1.41838
10	B10	OSBPL9	PG	PG 16:0-20:3	0.276951
10	B10	OSBPL9	HCER	HCER 26:0	0.243491
10	B10	OSBPL9	DCER	DCER 22:0	0.636298
10	B10	OSBPL9	PG	PG 18:1-20:4	0.970222
10	B10	OSBPL9	TAG	TAG 53:5-20:4	0.0786125
10	B10	OSBPL9	DAG	DAG 18:0-22:6	0.142433
10	B10	OSBPL9	PS	PS 18:0-22:4	10.3492
10	B10	OSBPL9	PE	PE 18:1-22:4	3.29369
10	B10	OSBPL9	PS	PS 18:0-18:3	1.63681
10	B10	OSBPL9	TAG	TAG 54:3-18:1	22.4324
10	B10	OSBPL9	CE	CE 14:0	5.12065
10	B10	OSBPL9	TAG	TAG 50:4-14:0	0.0701356
10	B10	OSBPL9	TAG	TAG 58:7-22:6	0.0848439
10	B10	OSBPL9	PG	PG 18:1-18:2	2.07635
10	B10	OSBPL9	TAG	TAG 56:7-20:3	NA
10	B10	OSBPL9	PC	PC 18:1-20:0	2.80131
10	B10	OSBPL9	DAG	DAG 16:1-20:4	0.0605536
10	B10	OSBPL9	TAG	TAG 46:1-12:0	0.231044
10	B10	OSBPL9	TAG	TAG 50:5-18:2	NA
10	B10	OSBPL9	TAG	TAG 47:1-17:0	0.0450584
10	B10	OSBPL9	TAG	TAG 47:0-16:0	2.5132
10	B10	OSBPL9	TAG	TAG 50:4-20:3	NA
10	B10	OSBPL9	TAG	TAG 52:7-16:0	1.72276
10	B10	OSBPL9	SM	SM 20:1	1.21483
10	B10	OSBPL9	TAG	TAG 54:5-20:4	0.429493
10	B10	OSBPL9	TAG	TAG 52:3-20:0	NA
10	B10	OSBPL9	PC	PC 17:0-18:1	10.9001
10	B10	OSBPL9	TAG	TAG 58:7-18:1	0.0508105
10	B10	OSBPL9	TAG	TAG 50:2-18:2	3.00789
10	B10	OSBPL9	TAG	TAG 44:0-18:0	0.073819
10	B10	OSBPL9	TAG	TAG 50:1-14:0	1.43947
10	B10	OSBPL9	TAG	TAG 48:3-18:3	0.0433933
10	B10	OSBPL9	TAG	TAG 44:2-12:0	NA
10	B10	OSBPL9	TAG	TAG 51:3-16:1	0.280896
10	B10	OSBPL9	DAG	DAG 18:2-18:3	0.108372
10	B10	OSBPL9	PS	PS 16:0-20:1	NA
10	B10	OSBPL9	PC	PC 18:2-20:3	2.20637
10	B10	OSBPL9	PG	PG 18:1-20:3	0.228077
10	B10	OSBPL9	PC	PC 18:1-20:2	7.70725
10	B10	OSBPL9	TAG	TAG 53:4-18:2	0.547411
10	B10	OSBPL9	PS	PS 18:0-20:2	NA
10	B10	OSBPL9	HCER	HCER 24:0	29.94
10	B10	OSBPL9	DAG	DAG 18:2-22:5	NA
10	B10	OSBPL9	TAG	TAG 52:6-18:3	NA
10	B10	OSBPL9	TAG	TAG 56:9-18:3	0.0340867
10	B10	OSBPL9	DCER	DCER 18:1	NA
10	B10	OSBPL9	TAG	TAG 58:7-20:4	0.0260976
10	B10	OSBPL9	PS	PS 16:1-17:0	NA
10	B10	OSBPL9	CE	CE 22:6	1.02066
10	B10	OSBPL9	TAG	TAG 44:1-14:0	0.127026
10	B10	OSBPL9	PE	PE 18:0-18:2	201.229
10	B10	OSBPL9	PS	PS 16:0-16:0	NA
10	B10	OSBPL9	PA	PA 36:5	0.235783
10	B10	OSBPL9	TAG	TAG 46:1-16:0	0.707033
10	B10	OSBPL9	TAG	TAG 58:3-18:1	0.266036
10	B10	OSBPL9	TAG	TAG 56:6-22:4	0.0532072
10	B10	OSBPL9	TAG	TAG 50:1-16:1	1.53103
10	B10	OSBPL9	PA	PA 34:5	0.42129
10	B10	OSBPL9	PC	PC 18:1-18:1	256.597
10	B10	OSBPL9	PE-O	PE-O 18:0-16:1	1.76205
10	B10	OSBPL9	TAG	TAG 54:5-22:4	0.0330215
10	B10	OSBPL9	SM	SM 18:0	8.40491
10	B10	OSBPL9	TAG	TAG 48:1-18:1	2.79937
10	B10	OSBPL9	TAG	TAG 56:4-20:1	0.203721
10	B10	OSBPL9	TAG	TAG 54:4-22:4	0.109291
10	B10	OSBPL9	TAG	TAG 52:5-18:2	0.247821
10	B10	OSBPL9	TAG	TAG 42:1-14:0	NA
10	B10	OSBPL9	PC	PC 18:0-20:4	11.66
10	B10	OSBPL9	HCER	HCER 20:0	1.80277
10	B10	OSBPL9	TAG	TAG 54:2-18:2	2.46287
10	B10	OSBPL9	TAG	TAG 46:3-16:0	NA
10	B10	OSBPL9	TAG	TAG 48:2-12:0	0.117919
10	B10	OSBPL9	TAG	TAG 56:8-20:4	0.059918
10	B10	OSBPL9	TAG	TAG 56:4-20:2	0.200366
10	B10	OSBPL9	DAG	DAG 12:0-18:1	0.511488
10	B10	OSBPL9	PA	PA 36:1	3.39216
10	B10	OSBPL9	PI	PI 18:1-20:0	0.945427
10	B10	OSBPL9	TAG	TAG 56:3-16:0	0.114563
10	B10	OSBPL9	TAG	TAG 54:6-20:4	0.172564
10	B10	OSBPL9	PE-O	PE-O 18:0-20:4	7.58282
10	B10	OSBPL9	PC	PC 16:1-20:0	NA
10	B10	OSBPL9	PG	PG 18:1-22:4	NA
10	B10	OSBPL9	TAG	TAG 56:4-20:3	0.161539
10	B10	OSBPL9	TAG	TAG 44:0-16:0	0.390186
10	B10	OSBPL9	TAG	TAG 52:2-18:0	4.99477
10	B10	OSBPL9	PS	PS 18:0-22:5	7.74835
10	B10	OSBPL9	PE	PE 18:1-22:5	1.75103
10	B10	OSBPL9	PS	PS 18:0-20:0	NA
10	B10	OSBPL9	PI	PI 16:0-18:0	5.36627
10	B10	OSBPL9	LPC	LPC 15:0	NA
10	B10	OSBPL9	PI	PI 18:0-22:5	1.9272
10	B10	OSBPL9	PC	PC 18:0-22:4	2.60814
10	B10	OSBPL9	PE	PE 16:0-16:1	7.17715
10	B10	OSBPL9	TAG	TAG 57:10-22:6	0.567064
10	B10	OSBPL9	PI	PI 15:0-22:2	3.64023
10	B10	OSBPL9	PE	PE 18:1-18:1	67.3288
10	B10	OSBPL9	TAG	TAG 58:8-18:1	0.0905961
10	B10	OSBPL9	TAG	TAG 56:5-20:1	0.0373889
10	B10	OSBPL9	DAG	DAG 18:1-18:2	9.56521
10	B10	OSBPL9	PE-P	PE-P 18:1-20:2	0.951296
10	B10	OSBPL9	TAG	TAG 52:2-18:1	26.2086
10	B10	OSBPL9	CE	CE 20:3	2.06818
10	B10	OSBPL9	PC	PC 16:0-18:1	792.714
10	B10	OSBPL9	PI	PI 16:0-22:4	NA
10	B10	OSBPL9	PE-P	PE-P 18:1-16:1	3.3522
10	B10	OSBPL9	TAG	TAG 56:6-20:4	0.21235
10	B10	OSBPL9	PE	PE 14:1-18:0	NA
10	B10	OSBPL9	SM	SM 22:0	72.2454
10	B10	OSBPL9	TAG	TAG 52:3-18:1	8.07503
10	B10	OSBPL9	FA	FA 22:4	0.371456
10	B10	OSBPL9	TAG	TAG 49:1-16:1	0.494683
10	B10	OSBPL9	PG	PG 18:2-18:2	0.32431
10	B10	OSBPL9	TAG	TAG 50:3-14:1	0.158663
10	B10	OSBPL9	TAG	TAG 56:7-20:5	0.111208
10	B10	OSBPL9	TAG	TAG 42:2-12:0	NA
10	B10	OSBPL9	PE	PE 16:1-18:1	13.2154
10	B10	OSBPL9	PC	PC 18:0-22:6	NA
10	B10	OSBPL9	TAG	TAG 54:3-20:1	0.418468
10	B10	OSBPL9	TAG	TAG 48:4-12:0	NA
10	B10	OSBPL9	PE	PE 18:1-18:3	1.30718
10	B10	OSBPL9	PE-P	PE-P 18:0-18:3	0.738522
10	B10	OSBPL9	PI	PI 18:0-18:1	108.864
10	B10	OSBPL9	TAG	TAG 52:7-20:5	NA
10	B10	OSBPL9	TAG	TAG 56:8-18:2	NA
10	B10	OSBPL9	PE	PE 18:2-20:1	1.54717
10	B10	OSBPL9	PE-P	PE-P 18:0-22:4	13.775
10	B10	OSBPL9	TAG	TAG 54:3-16:1	0.199407
10	B10	OSBPL9	DAG	DAG 16:0-22:5	0.636312
10	B10	OSBPL9	FA	FA 22:6	0.440972
10	B10	OSBPL9	DAG	DAG 14:1-18:1	0.364713
10	B10	OSBPL9	PA	PA 40:4	NA
10	B10	OSBPL9	PS	PS 16:0-16:1	1.70702
10	B10	OSBPL9	TAG	TAG 54:4-18:3	0.16825
10	B10	OSBPL9	CE	CE 20:0	13.7932
10	B10	OSBPL9	TAG	TAG 54:3-20:3	0.30007
10	B10	OSBPL9	TAG	TAG 53:1-18:1	1.40352
10	B10	OSBPL9	PI	PI 16:0-16:1	1.74621
10	B10	OSBPL9	FA	FA 16:1	3.40841
10	B10	OSBPL9	LCER	LCER 24:1	17.9183
10	B10	OSBPL9	CE	CE 12:0	0.305742
10	B10	OSBPL9	PC	PC 14:0-18:0	6.71204
10	B10	OSBPL9	TAG	TAG 51:3-18:3	0.0632734
10	B10	OSBPL9	PS	PS 16:1-18:1	7.92219
10	B10	OSBPL9	LPE	LPE 18:1	1.91025
10	B10	OSBPL9	PS	PS 16:0-18:0	0.877563
10	B10	OSBPL9	TAG	TAG 56:7-18:3	0.0848439
10	B10	OSBPL9	CE	CE 22:1	1.24176
10	B10	OSBPL9	TAG	TAG 50:2-18:0	0.551725
10	B10	OSBPL9	TAG	TAG 51:0-16:0	2.24093
10	B10	OSBPL9	PE	PE 18:2-20:3	0.715201
10	B10	OSBPL9	PI	PI 18:2-18:2	0.55511
10	B10	OSBPL9	TAG	TAG 52:1-20:0	0.116481
10	B10	OSBPL9	TAG	TAG 56:6-22:6	0.140927
10	B10	OSBPL9	TAG	TAG 52:1-18:0	17.2329
10	B10	OSBPL9	TAG	TAG 58:10-20:5	NA
10	B10	OSBPL9	TAG	TAG 60:11-22:5	NA
10	B10	OSBPL9	TAG	TAG 52:4-14:0	0.0580007
10	B10	OSBPL9	HCER	HCER 20:1	0.374601
10	B10	OSBPL9	TAG	TAG 48:2-18:2	0.560354
10	B10	OSBPL9	TAG	TAG 56:8-20:5	0.0612496
10	B10	OSBPL9	PE-O	PE-O 16:0-22:4	2.56176
10	B10	OSBPL9	DAG	DAG 15:0-18:2	0.450257
10	B10	OSBPL9	DAG	DAG 18:1-20:5	0.0956035
10	B10	OSBPL9	TAG	TAG 54:7-18:3	0.08772
10	B10	OSBPL9	PE	PE 18:2-18:2	5.71284
10	B10	OSBPL9	TAG	TAG 56:7-16:0	0.190779
10	B10	OSBPL9	TAG	TAG 48:4-18:2	NA
10	B10	OSBPL9	PG	PG 18:0-18:1	12.4504
10	B10	OSBPL9	TAG	TAG 50:0-18:0	12.0344
10	B10	OSBPL9	TAG	TAG 56:6-20:3	0.0459161
10	B10	OSBPL9	TAG	TAG 60:10-22:6	NA
10	B10	OSBPL9	TAG	TAG 56:10-18:2	0.0661495
10	B10	OSBPL9	TAG	TAG 49:3-18:2	0.157704
10	B10	OSBPL9	TAG	TAG 58:9-18:1	0.147159
10	B10	OSBPL9	PE-O	PE-O 18:0-18:2	13.6724
10	B10	OSBPL9	PI	PI 15:0-20:0	NA
10	B10	OSBPL9	TAG	TAG 44:1-18:1	0.072381
10	B10	OSBPL9	DAG	DAG 16:0-16:0	47.0658
10	B10	OSBPL9	CE	CE 22:4	0.266077
10	B10	OSBPL9	TAG	TAG 49:0-15:0	1.36901
10	B10	OSBPL9	TAG	TAG 36:0-12:0	0.0314237
10	B10	OSBPL9	CE	CE 15:0	4.8866
10	B10	OSBPL9	TAG	TAG 44:3-18:2	NA
10	B10	OSBPL9	TAG	TAG 56:8-22:6	0.0402649
10	B10	OSBPL9	TAG	TAG 54:5-20:5	0.0675875
10	B10	OSBPL9	PG	PG 16:0-16:0	1.73032
10	B10	OSBPL9	TAG	TAG 56:8-18:3	0.149555
10	B10	OSBPL9	TAG	TAG 52:6-18:2	NA
10	B10	OSBPL9	TAG	TAG 55:1-16:0	0.32883
10	B10	OSBPL9	PA	PA 38:5	0.305132
10	B10	OSBPL9	PS	PS 18:1-20:0	3.908
10	B10	OSBPL9	TAG	TAG 56:7-18:0	1.11208
10	B10	OSBPL9	TAG	TAG 46:1-14:1	0.122712
10	B10	OSBPL9	TAG	TAG 54:4-18:1	5.11412
10	B10	OSBPL9	TAG	TAG 52:2-16:0	14.8808
10	B10	OSBPL9	PA	PA 36:0	0.805131
10	B10	OSBPL9	TAG	TAG 57:3-18:2	0.0423841
10	B10	OSBPL9	FA	FA 15:0	8.51504
10	B10	OSBPL9	PG	PG 16:0-20:1	0.2222
10	B10	OSBPL9	PE	PE 16:0-18:3	0.467731
10	B10	OSBPL9	DAG	DAG 16:0-20:5	0.083849
10	B10	OSBPL9	DCER	DCER 26:1	NA
10	B10	OSBPL9	LCER	LCER 22:1	0.552977
10	B10	OSBPL9	TAG	TAG 50:4-16:1	0.122233
10	B10	OSBPL9	TAG	TAG 54:2-18:0	9.80643
10	B10	OSBPL9	PE-P	PE-P 16:1-18:1	2.22406
10	B10	OSBPL9	PC	PC 16:1-18:0	28.0731
10	B10	OSBPL9	TAG	TAG 52:2-20:0	NA
10	B10	OSBPL9	CE	CE 20:5	0.682514
10	B10	OSBPL9	PE-P	PE-P 18:1-20:4	38.7631
10	B10	OSBPL9	PE-P	PE-P 16:0-18:2	70.74
10	B10	OSBPL9	PS	PS 18:0-20:3	6.67611
10	B10	OSBPL9	PE	PE 16:0-18:2	28.3466
10	B10	OSBPL9	TAG	TAG 56:6-20:2	NA
10	B10	OSBPL9	TAG	TAG 50:4-18:1	0.0686219
10	B10	OSBPL9	PI	PI 15:0-20:3	NA
10	B10	OSBPL9	PE	PE 14:1-18:2	1.51803
10	B10	OSBPL9	TAG	TAG 49:2-18:1	0.479344
10	B10	OSBPL9	PS	PS 16:1-18:0	9.18685
10	B10	OSBPL9	PE-P	PE-P 18:0-16:0	4.36216
10	B10	OSBPL9	PE	PE 17:0-20:4	2.81884
10	B10	OSBPL9	TAG	TAG 56:8-18:1	0.375327
10	B10	OSBPL9	CE	CE 22:0	0.399517
10	B10	OSBPL9	TAG	TAG 46:2-16:0	0.0829266
10	B10	OSBPL9	TAG	TAG 53:4-20:4	0.0726585
10	B10	OSBPL9	DAG	DAG 14:0-18:1	6.96661
10	B10	OSBPL9	TAG	TAG 56:4-16:0	0.1021
10	B10	OSBPL9	PE-P	PE-P 18:1-18:2	33.8014
10	B10	OSBPL9	DAG	DAG 12:0-18:0	0.868194
10	B10	OSBPL9	PG	PG 16:0-16:1	0.996189
10	B10	OSBPL9	LCER	LCER 18:0	1.83087
10	B10	OSBPL9	TAG	TAG 56:5-18:1	0.344649
10	B10	OSBPL9	TAG	TAG 49:2-14:0	0.30726
10	B10	OSBPL9	TAG	TAG 58:7-22:5	0.0728603
10	B10	OSBPL9	PI	PI 17:0-18:2	1.06711
10	B10	OSBPL9	TAG	TAG 54:8-18:2	0.045804
10	B10	OSBPL9	TAG	TAG 48:1-14:0	2.74041
10	B10	OSBPL9	TAG	TAG 58:7-16:0	0.125109
10	B10	OSBPL9	PE-P	PE-P 16:0-16:0	3.29848
10	B10	OSBPL9	TAG	TAG 54:4-16:0	0.506667
10	B10	OSBPL9	TAG	TAG 46:0-18:0	0.348963
10	B10	OSBPL9	FA	FA 17:0	12.6521
10	B10	OSBPL9	PG	PG 18:0-18:0	0.712427
10	B10	OSBPL9	PG	PG 16:1-18:1	6.10241
10	B10	OSBPL9	TAG	TAG 45:1-15:0	0.0493725
10	B10	OSBPL9	TAG	TAG 53:1-16:0	0.89206
10	B10	OSBPL9	PG	PG 16:0-18:0	2.70357
10	B10	OSBPL9	DAG	DAG 18:2-20:4	0.137154
10	B10	OSBPL9	TAG	TAG 46:3-18:2	0.0358247
10	B10	OSBPL9	TAG	TAG 58:7-22:4	NA
10	B10	OSBPL9	PE-P	PE-P 16:0-22:1	NA
10	B10	OSBPL9	DAG	DAG 18:1-18:1	16.9577
10	B10	OSBPL9	TAG	TAG 53:4-16:0	0.123191
10	B10	OSBPL9	TAG	TAG 50:2-14:1	0.104497
10	B10	OSBPL9	PC	PC 16:0-20:1	8.81995
10	B10	OSBPL9	TAG	TAG 52:1-18:1	17.5627
10	B10	OSBPL9	TAG	TAG 52:4-20:0	NA
10	B10	OSBPL9	PA	PA 34:2	7.51768
10	B10	OSBPL9	PE-O	PE-O 18:0-20:1	NA
10	B10	OSBPL9	TAG	TAG 55:7-15:0	0.0418796
10	B10	OSBPL9	DAG	DAG 16:0-20:3	0.610701
10	B10	OSBPL9	PE-O	PE-O 16:0-22:5	1.21643
10	B10	OSBPL9	PE	PE 14:0-18:2	0.777655
10	B10	OSBPL9	TAG	TAG 54:1-20:1	0.666289
10	B10	OSBPL9	PE	PE 18:0-20:3	12.8773
10	B10	OSBPL9	TAG	TAG 55:2-18:2	0.0848439
10	B10	OSBPL9	TAG	TAG 54:5-18:0	0.0762157
10	B10	OSBPL9	PS	PS 16:0-18:2	5.28854
10	B10	OSBPL9	TAG	TAG 51:2-15:0	0.661495
10	B10	OSBPL9	PG	PG 18:1-18:1	4.95485
10	B10	OSBPL9	PC	PC 18:1-20:1	8.20977
10	B10	OSBPL9	TAG	TAG 56:4-18:2	0.232482
10	B10	OSBPL9	TAG	TAG 50:5-18:3	NA
10	B10	OSBPL9	PI	PI 18:0-22:6	NA
10	B10	OSBPL9	CER	CER 20:0	0.532621
10	B10	OSBPL9	PE-O	PE-O 16:0-22:6	NA
10	B10	OSBPL9	PI	PI 15:0-18:2	NA
10	B10	OSBPL9	PC	PC 14:0-16:1	11.5849
10	B10	OSBPL9	TAG	TAG 56:4-22:4	0.106414
10	B10	OSBPL9	TAG	TAG 48:1-16:1	1.39441
10	B10	OSBPL9	TAG	TAG 52:5-16:1	0.129423
10	B10	OSBPL9	CE	CE 20:2	0.922007
10	B10	OSBPL9	PE	PE 16:0-22:5	0.67407
10	B10	OSBPL9	TAG	TAG 56:7-18:2	0.0488931
10	B10	OSBPL9	PE-P	PE-P 16:0-16:1	6.3391
10	B10	OSBPL9	TAG	TAG 60:11-22:6	NA
10	B10	OSBPL9	TAG	TAG 52:1-16:1	0.736273
10	B10	OSBPL9	DAG	DAG 16:0-18:0	59.9421
10	B10	OSBPL9	PE-O	PE-O 18:0-16:0	1.69759
10	B10	OSBPL9	PE-O	PE-O 16:0-20:3	0.706348
10	B10	OSBPL9	PE-P	PE-P 16:0-20:3	14.0251
10	B10	OSBPL9	PE-P	PE-P 18:1-22:5	2.97521
10	B10	OSBPL9	PE-P	PE-P 16:0-20:1	5.7804
10	B10	OSBPL9	TAG	TAG 58:6-18:1	0.0805298
10	B10	OSBPL9	TAG	TAG 54:4-18:2	2.85737
10	B10	OSBPL9	DAG	DAG 18:0-18:2	7.72987
10	B10	OSBPL9	LPC	LPC 17:0	NA
10	B10	OSBPL9	TAG	TAG 54:3-20:2	0.440997
10	B10	OSBPL9	DAG	DAG 16:1-18:3	NA
10	B10	OSBPL9	FA	FA 16:0	257.808
10	B10	OSBPL9	PE	PE 16:0-22:6	NA
10	B10	OSBPL9	DAG	DAG 16:1-16:1	0.790953
10	B10	OSBPL9	CER	CER 14:0	1.70254
10	B10	OSBPL9	PI	PI 15:0-18:0	NA
10	B10	OSBPL9	PI	PI 18:0-18:0	4.92
10	B10	OSBPL9	TAG	TAG 51:2-18:2	0.932804
10	B10	OSBPL9	PE-P	PE-P 18:1-22:4	5.31383
10	B10	OSBPL9	PI	PI 18:1-18:3	NA
10	B10	OSBPL9	TAG	TAG 56:6-18:1	0.168729
10	B10	OSBPL9	TAG	TAG 52:0-16:0	15.0298
10	B10	OSBPL9	TAG	TAG 56:8-22:5	NA
10	B10	OSBPL9	TAG	TAG 55:1-18:1	0.418468
10	B10	OSBPL9	TAG	TAG 55:3-18:2	0.100662
10	B10	OSBPL9	FA	FA 24:0	14.6503
10	B10	OSBPL9	TAG	TAG 52:6-16:0	0.202283
10	B10	OSBPL9	TAG	TAG 54:5-18:2	1.1092
10	B10	OSBPL9	TAG	TAG 58:10-22:6	NA
10	B10	OSBPL9	CER	CER 18:0	5.91117
10	B10	OSBPL9	PE	PE 18:1-20:3	5.32478
10	B10	OSBPL9	PE	PE 16:0-16:0	0.582451
10	B10	OSBPL9	TAG	TAG 56:5-22:5	0.155787
10	B10	OSBPL9	TAG	TAG 52:6-22:6	NA
10	B10	OSBPL9	PE	PE 14:0-16:0	NA
10	B10	OSBPL9	TAG	TAG 46:3-16:1	NA
10	B10	OSBPL9	TAG	TAG 58:8-18:2	0.0273226
10	B10	OSBPL9	TAG	TAG 51:2-17:0	0.617875
10	B10	OSBPL9	TAG	TAG 48:1-14:1	0.151473
10	B10	OSBPL9	TAG	TAG 46:1-18:1	0.444832
10	B10	OSBPL9	TAG	TAG 46:1-16:1	0.426616
10	B10	OSBPL9	PE-P	PE-P 18:1-16:0	4.663
10	B10	OSBPL9	CE	CE 17:0	2.71056
10	B10	OSBPL9	TAG	TAG 54:5-22:5	0.158663
10	B10	OSBPL9	TAG	TAG 54:6-16:1	0.0556039
10	B10	OSBPL9	TAG	TAG 50:4-14:1	0.0546453
10	B10	OSBPL9	TAG	TAG 46:3-18:1	0.0206875
10	B10	OSBPL9	TAG	TAG 46:2-18:2	0.0934721
10	B10	OSBPL9	PE-O	PE-O 16:0-20:1	0.735132
10	B10	OSBPL9	PC	PC 18:2-20:0	2.11958
10	B10	OSBPL9	PI	PI 17:0-18:0	NA
10	B10	OSBPL9	DAG	DAG 16:1-22:6	NA
10	B10	OSBPL9	PC	PC 15:0-16:1	3.70339
10	B10	OSBPL9	TAG	TAG 54:6-22:5	0.0383475
10	B10	OSBPL9	TAG	TAG 45:1-18:1	0.0618354
10	B10	OSBPL9	TAG	TAG 45:0-15:0	0.173043
10	B10	OSBPL9	PE	PE 16:0-18:0	1.7728
10	B10	OSBPL9	DAG	DAG 14:1-16:0	0.415121
10	B10	OSBPL9	PE	PE 14:0-18:1	2.00917
10	B10	OSBPL9	TAG	TAG 58:9-18:2	NA
10	B10	OSBPL9	DAG	DAG 18:2-22:4	0.190744
10	B10	OSBPL9	TAG	TAG 55:5-20:4	0.0565122
10	B10	OSBPL9	PE	PE 18:0-20:4	90.5547
10	B10	OSBPL9	TAG	TAG 46:3-12:0	NA
10	B10	OSBPL9	TAG	TAG 56:8-16:0	0.288565
10	B10	OSBPL9	TAG	TAG 44:0-12:0	0.133737
10	B10	OSBPL9	TAG	TAG 56:7-22:5	NA
10	B10	OSBPL9	PE-P	PE-P 16:0-20:4	81.4933
10	B10	OSBPL9	PE-O	PE-O 16:0-18:0	NA
10	B10	OSBPL9	DAG	DAG 12:0-18:2	0.131782
10	B10	OSBPL9	PC	PC 18:1-20:4	9.04401
10	B10	OSBPL9	PA	PA 38:4	0.555478
10	B10	OSBPL9	TAG	TAG 53:2-17:0	0.727165
10	B10	OSBPL9	TAG	TAG 51:3-17:0	0.0814885
10	B10	OSBPL9	DAG	DAG 18:1-22:6	0.303948
10	B10	OSBPL9	PC	PC 14:0-20:3	NA
10	B10	OSBPL9	LPE	LPE 16:0	0.510373
10	B10	OSBPL9	TAG	TAG 52:2-20:2	0.244466
10	B10	OSBPL9	FA	FA 22:0	2.5905
10	B10	OSBPL9	TAG	TAG 58:6-22:4	0.0460171
10	B10	OSBPL9	TAG	TAG 51:1-16:0	4.36347
10	B10	OSBPL9	TAG	TAG 53:3-16:0	0.278978
10	B10	OSBPL9	TAG	TAG 54:7-22:5	NA
10	B10	OSBPL9	PE-O	PE-O 18:0-22:6	NA
10	B10	OSBPL9	TAG	TAG 58:6-16:0	NA
10	B10	OSBPL9	LPC	LPC 16:0	2.84681
10	B10	OSBPL9	PG	PG 17:0-18:1	1.17296
10	B10	OSBPL9	TAG	TAG 40:0-12:0	NA
10	B10	OSBPL9	TAG	TAG 54:3-18:3	0.178795
10	B10	OSBPL9	PE	PE 18:0-20:1	NA
10	B10	OSBPL9	SM	SM 20:0	22.9056
10	B10	OSBPL9	PE-P	PE-P 18:0-18:0	1.5794
10	B10	OSBPL9	TAG	TAG 58:8-20:4	NA
10	B10	OSBPL9	LPE	LPE 20:4	0.300391
10	B10	OSBPL9	TAG	TAG 55:2-18:1	0.417988
10	B10	OSBPL9	PE-O	PE-O 16:0-18:2	3.88615
10	B10	OSBPL9	CE	CE 20:4	9.17229
10	B10	OSBPL9	PE	PE 16:1-17:0	1.13162
[truncated: 268,805+ more rows]
