# Supplementary figures and images for: The ORP9-ORP11 dimer promotes sphingomyelin synthesis
Source: eLife journal article supplement (doi:10.7554/elife.91345), 2023-09-29

Figure 1

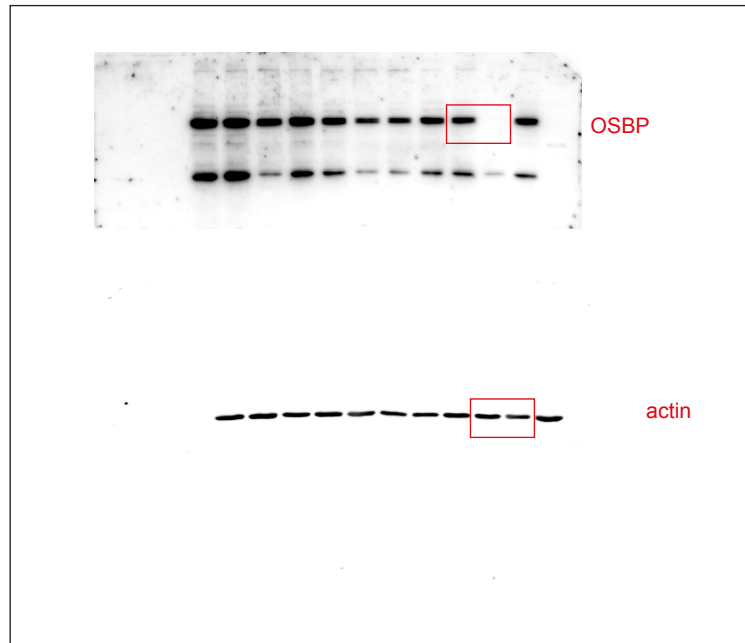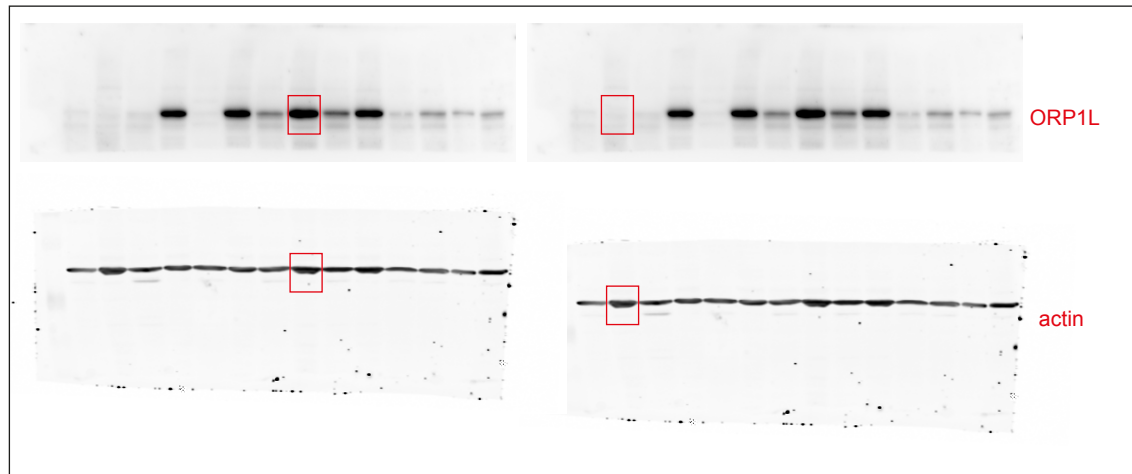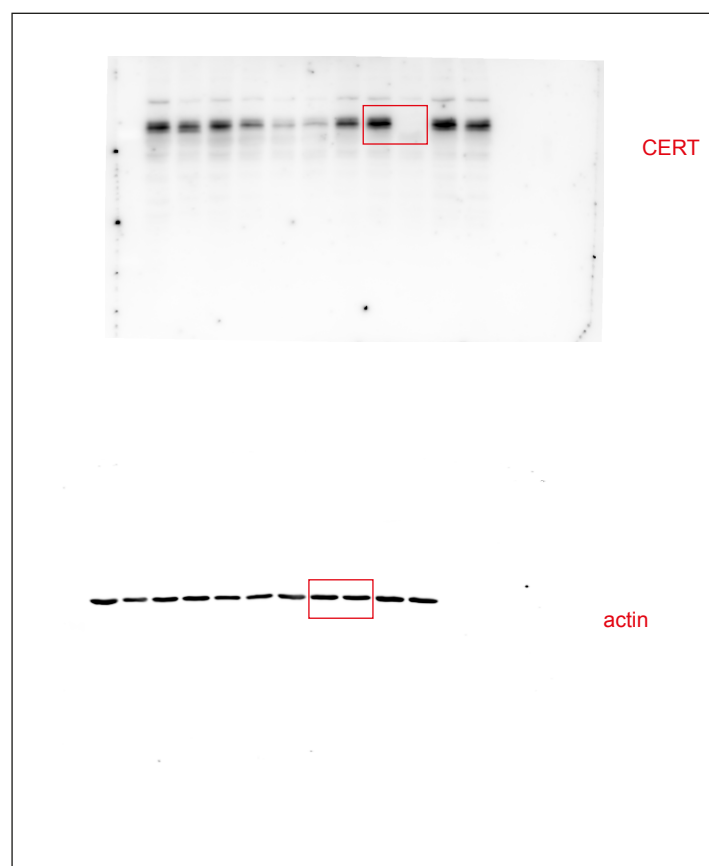

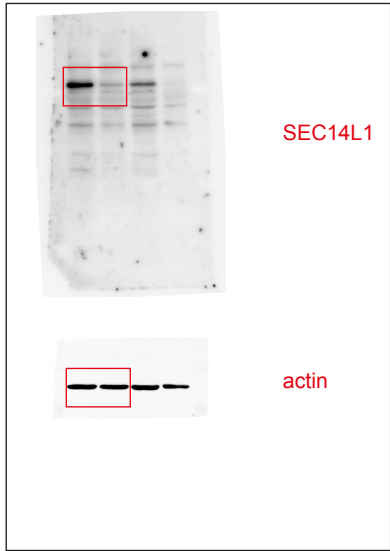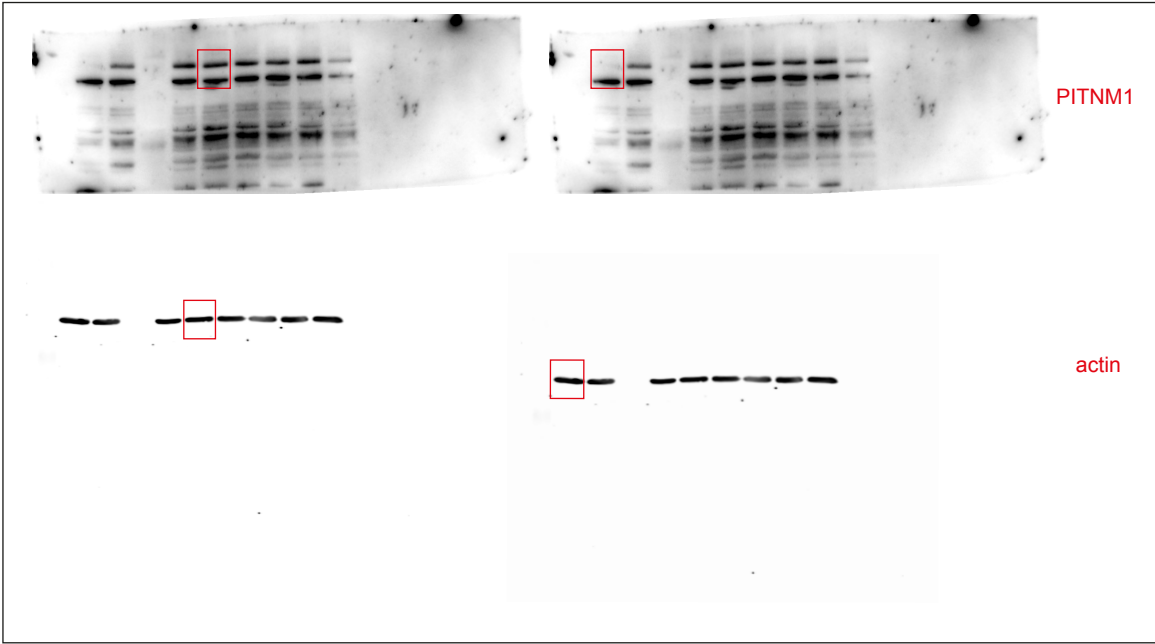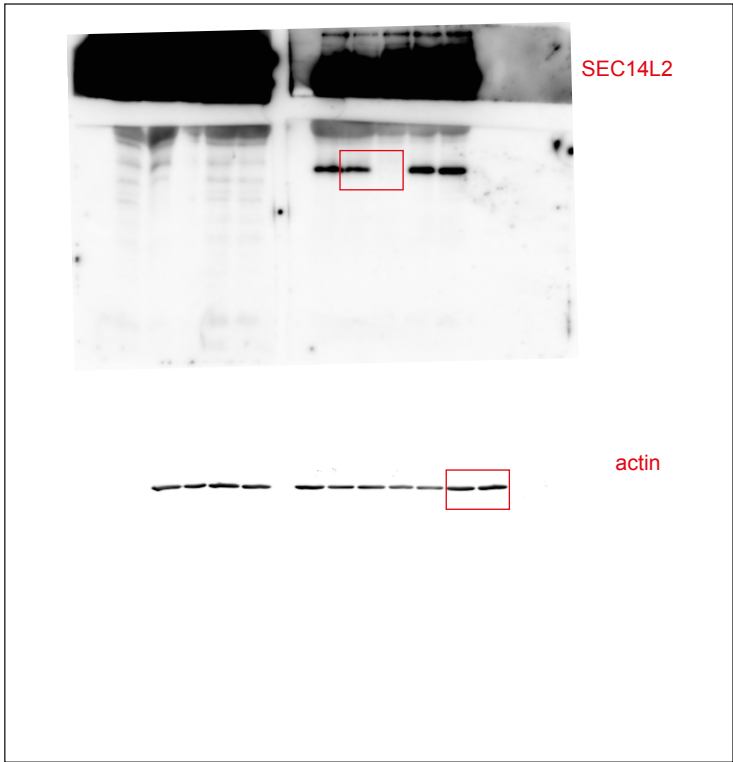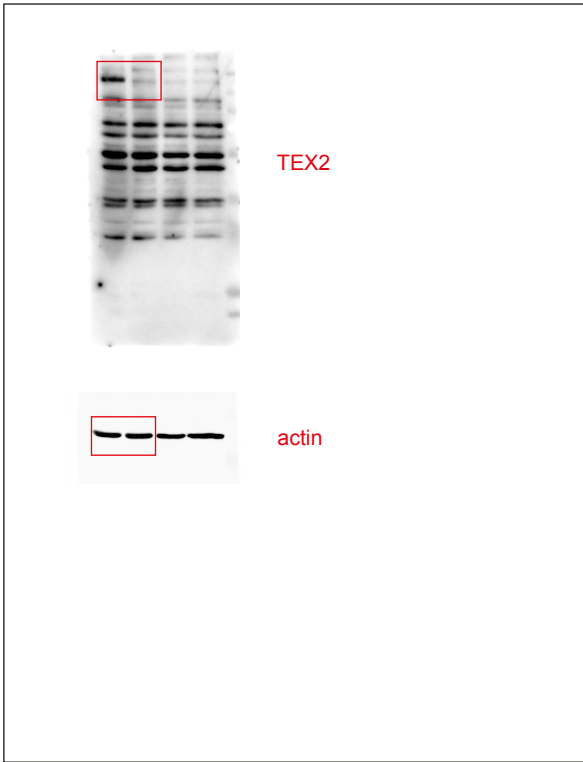

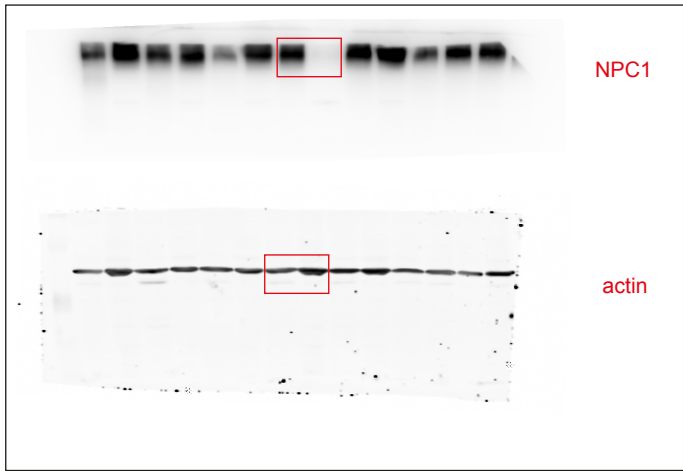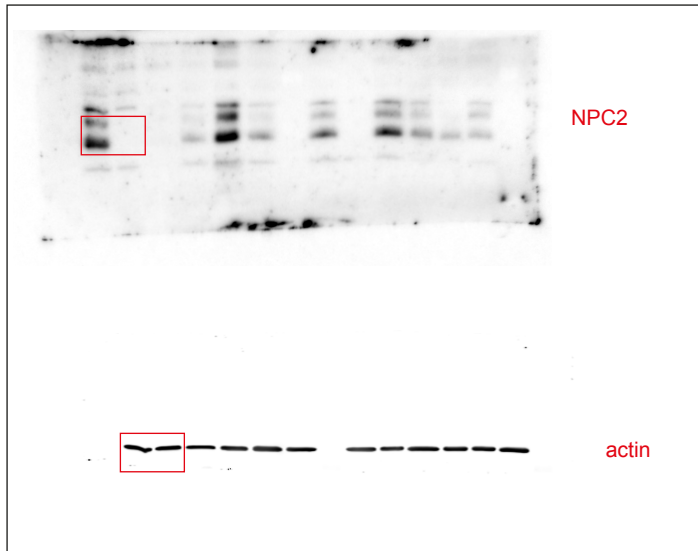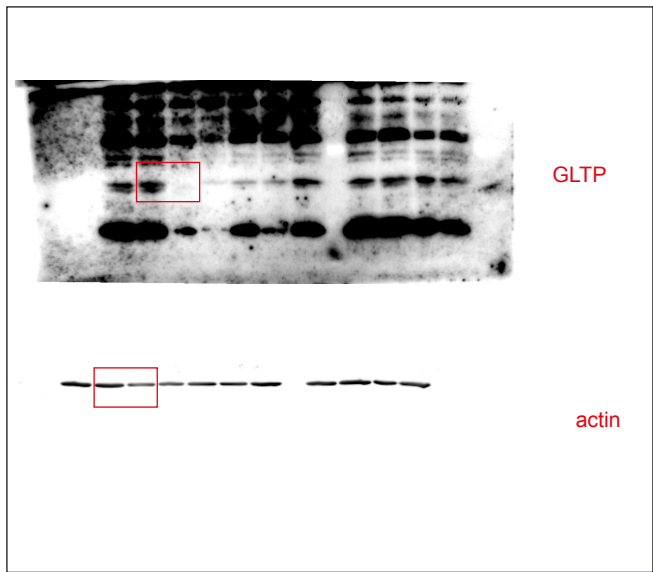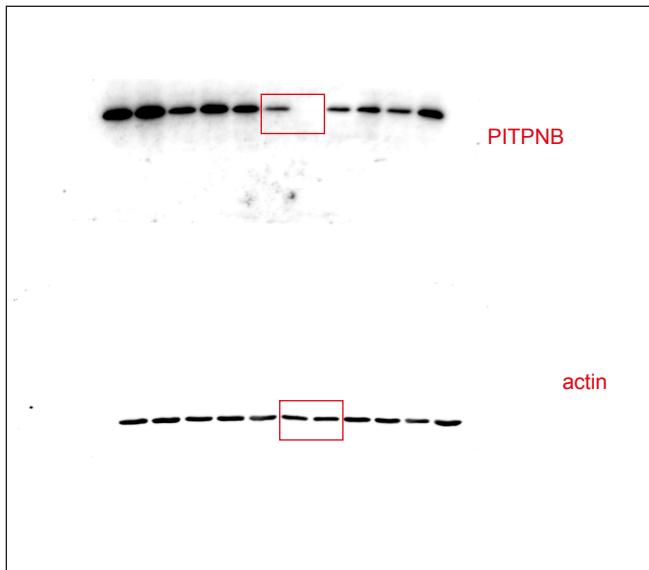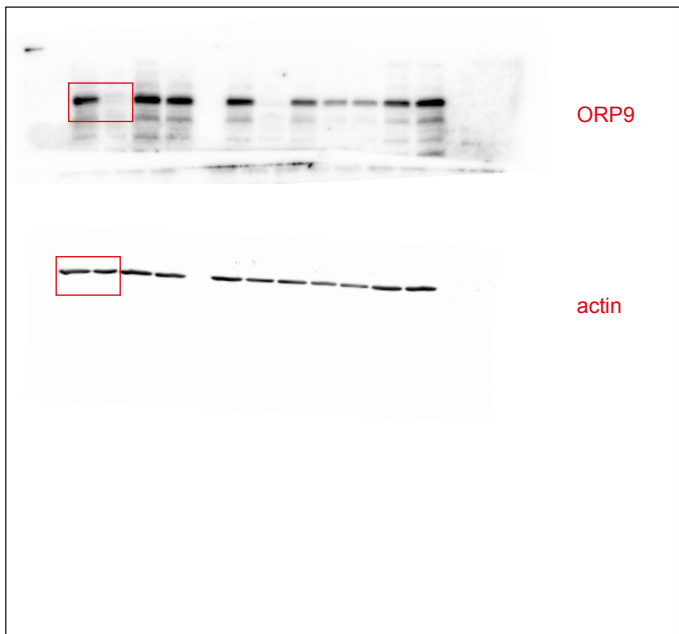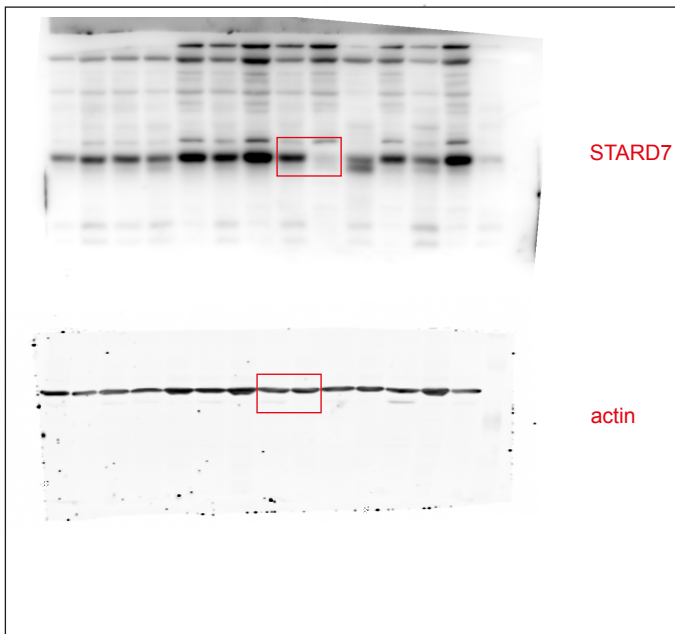

Supplement: fig1-data2 [file elife-91345-fig1-data2-v1.zip]

Figure1–figure supplement 1

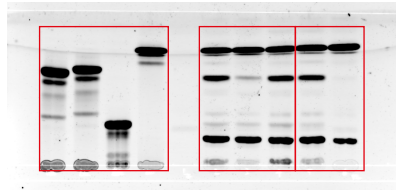

Supplement: fig1-figsupp1-data2 [file elife-91345-fig1-figsupp1-data2-v1.zip]

Figure 2-figure supplement 1

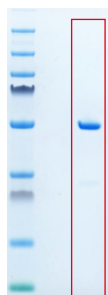

Supplement: fig2-figsupp1-data2 [file elife-91345-fig2-figsupp1-data2-v1.zip]

Figure 3

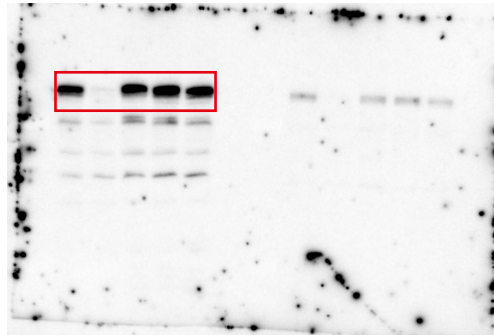

ORP9

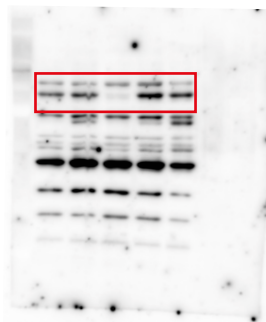

ORP11

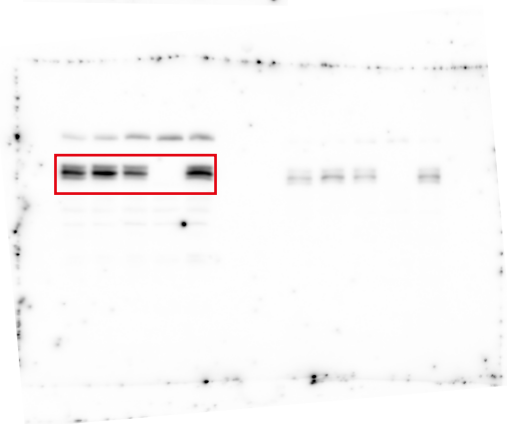

CERT

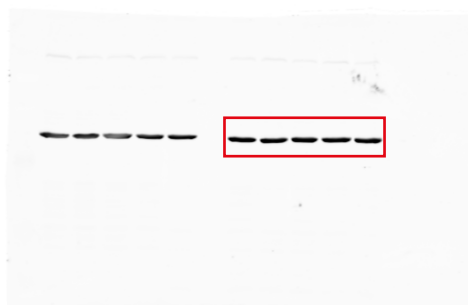

actin

Supplement: fig3-data2 [file elife-91345-fig3-data2-v1.zip]

Figure 4

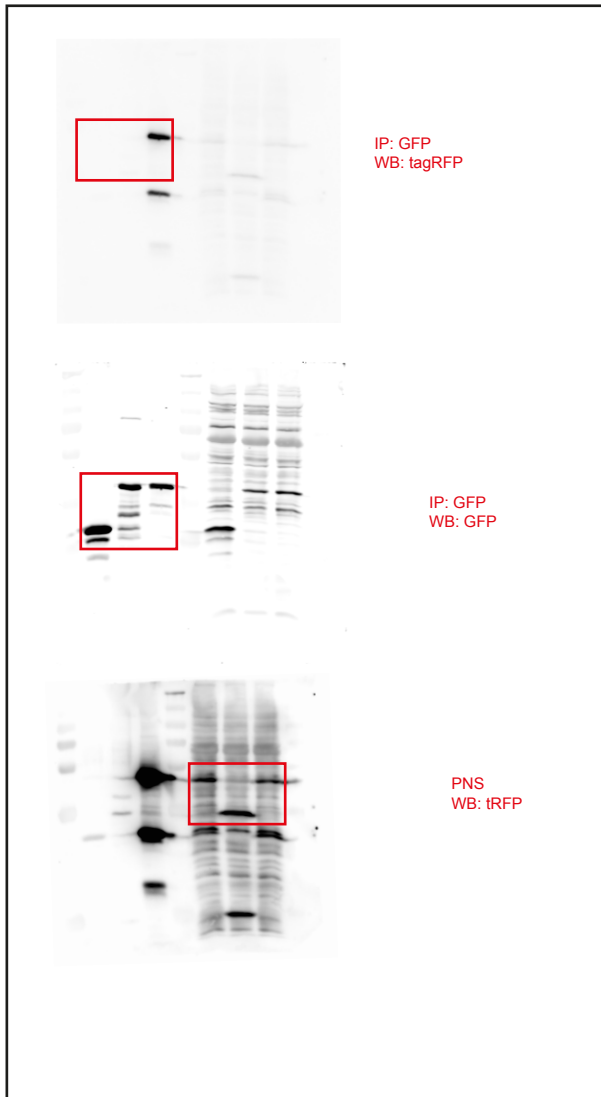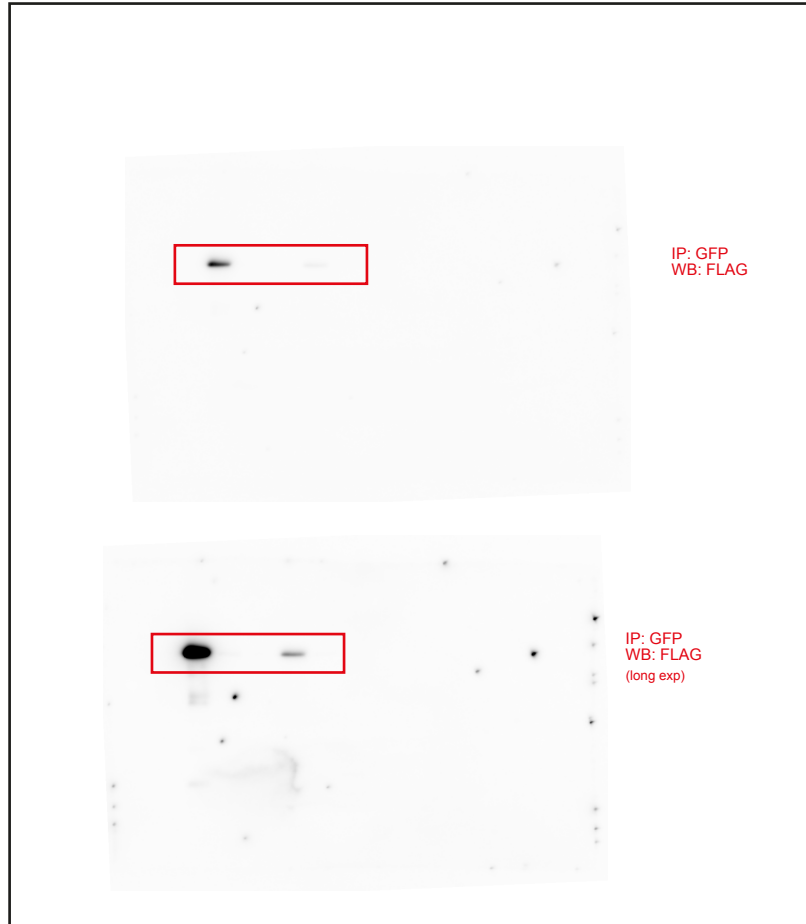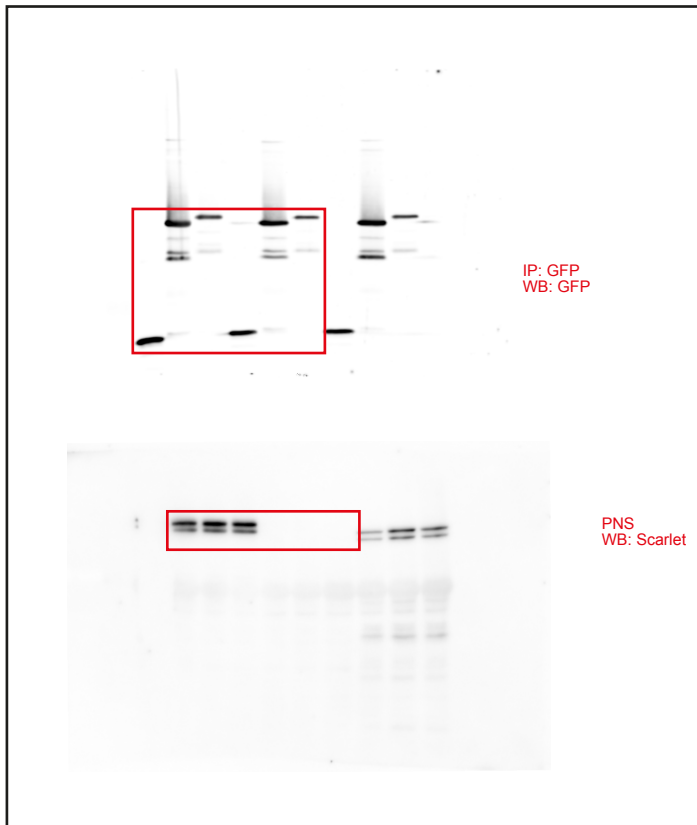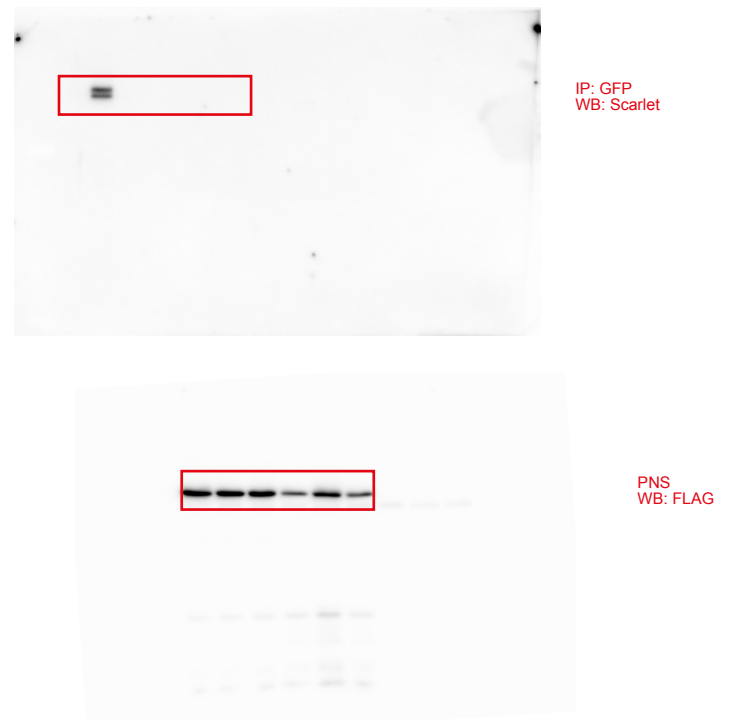

Supplement: fig4-data2 [file elife-91345-fig4-data2-v1.zip]

Figure 6-figure supplement 1

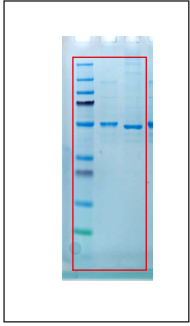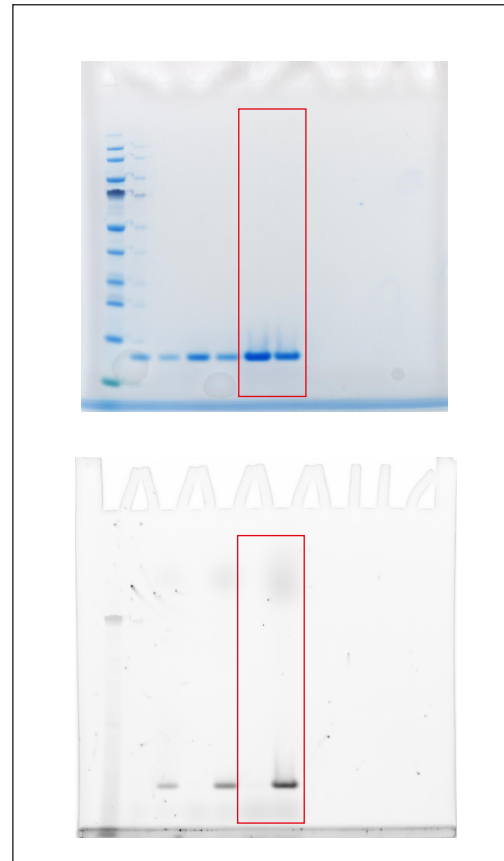

Strep-ORP9

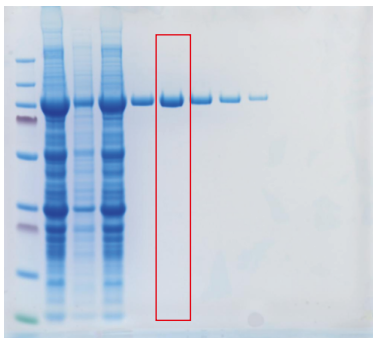

Strep-ORP11

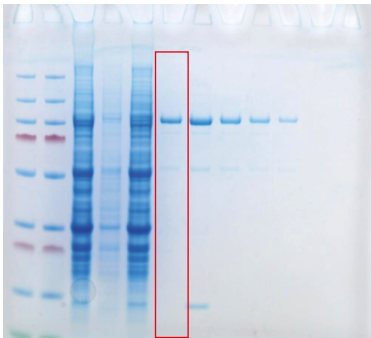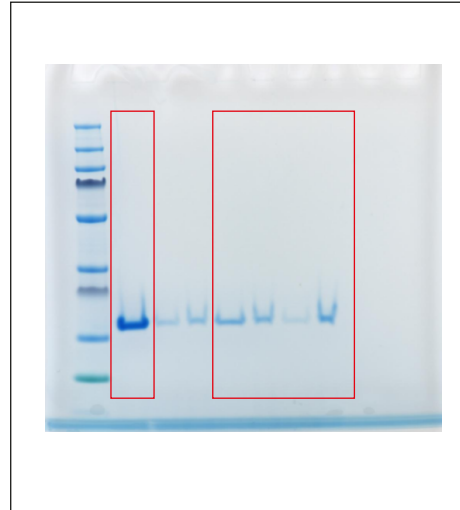

Supplement: fig6-figsupp1-data2 [file elife-91345-fig6-figsupp1-data2-v1.zip]

Figure 7

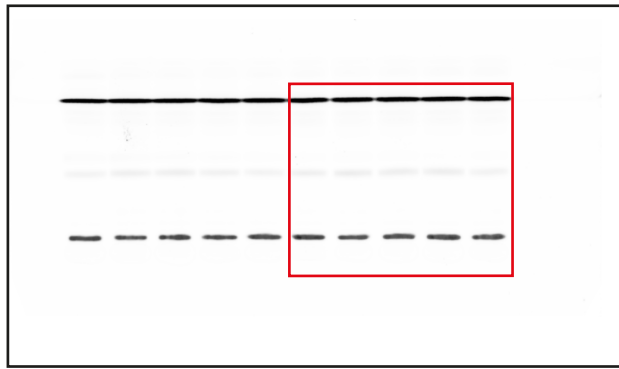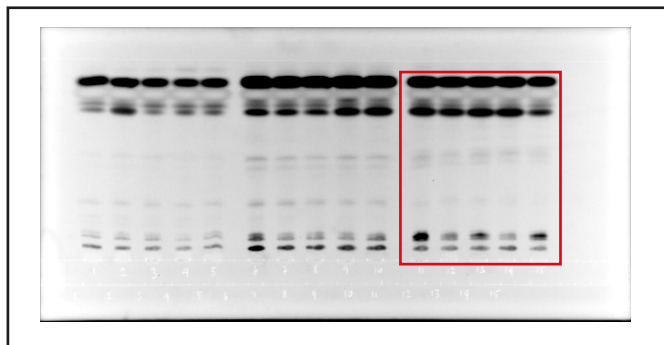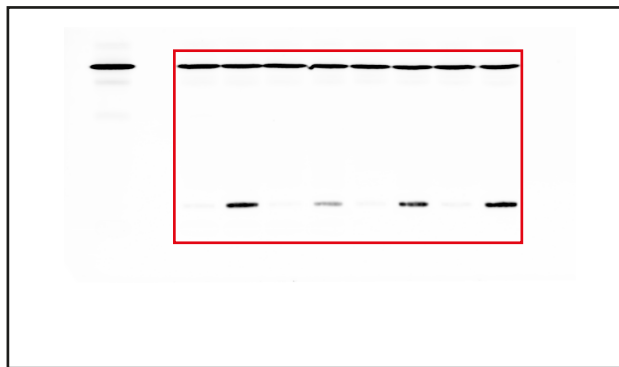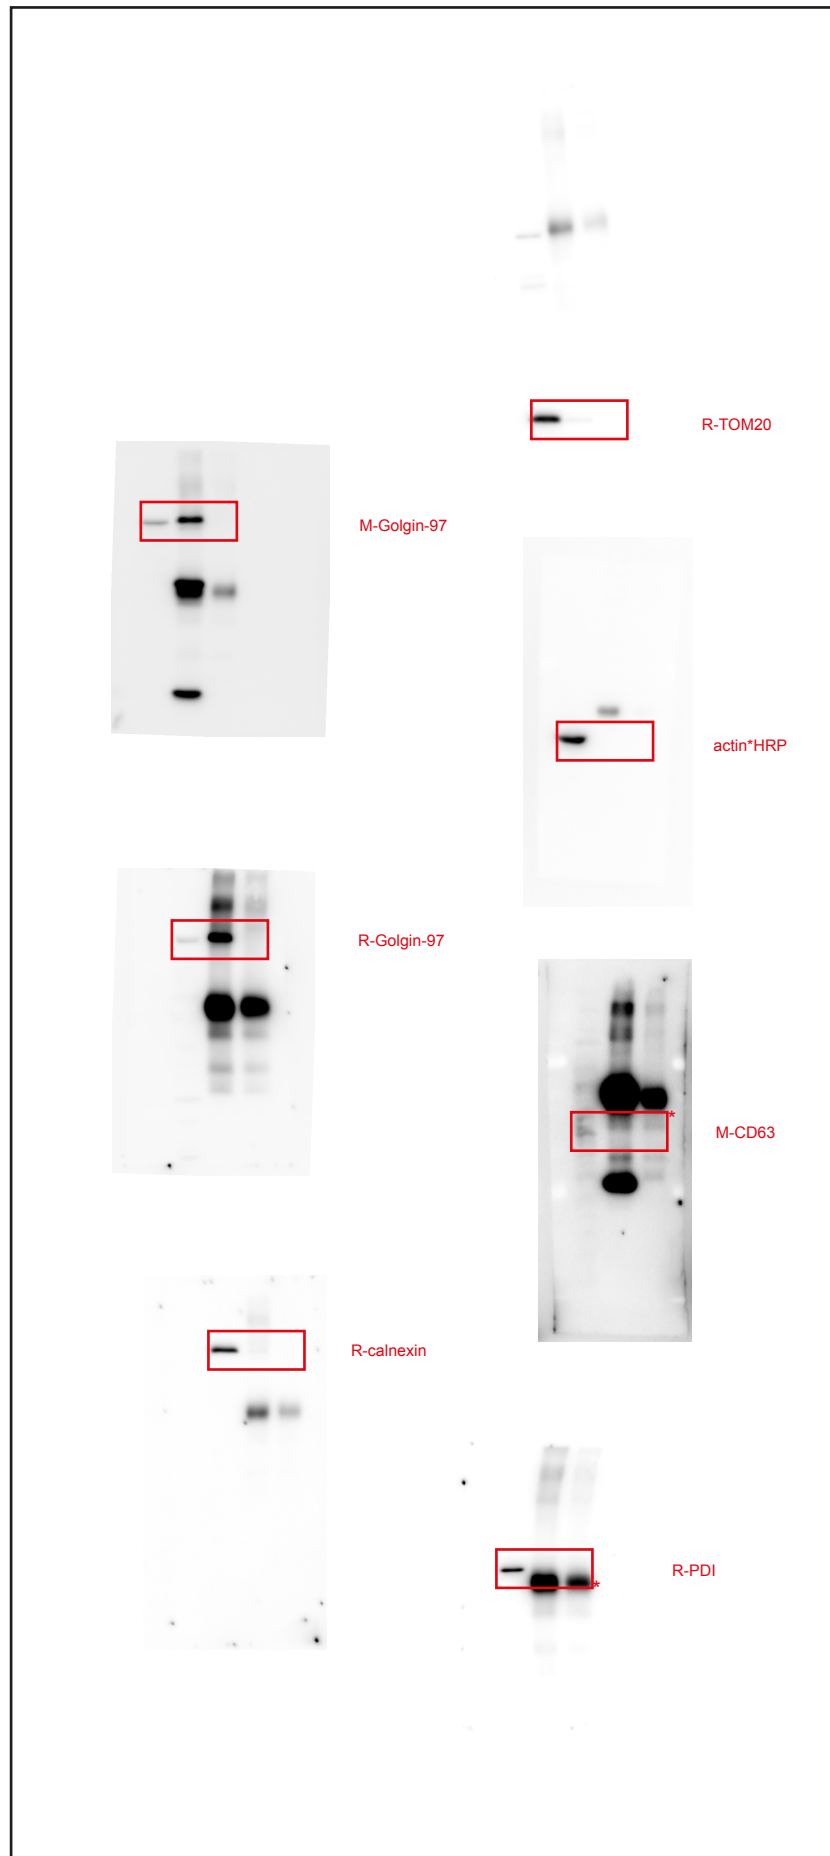

Supplement: fig7-data1 [file elife-91345-fig7-data1-v1.zip]

Figure 7 – figure supplement 1

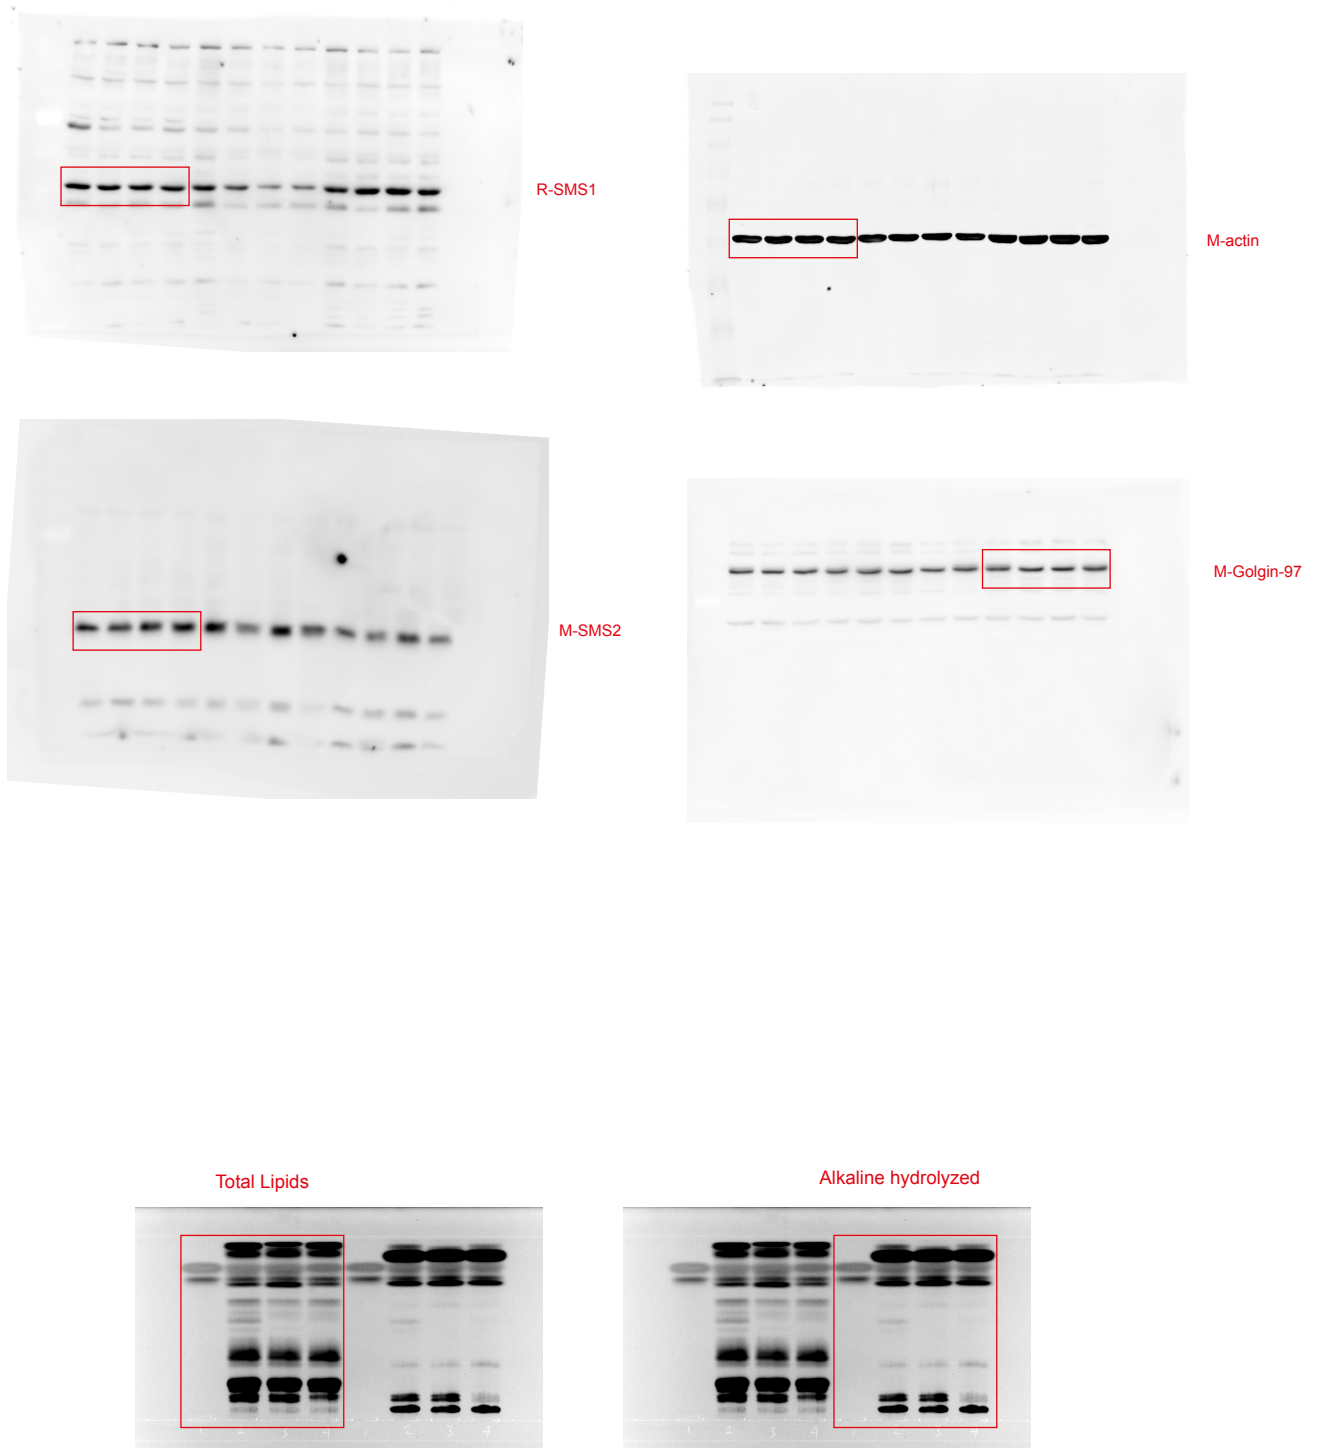

Supplement: fig7-figsupp1-data2 [file elife-91345-fig7-figsupp1-data2-v1.zip]

## Figure 7-figure supplement 2

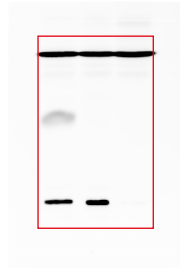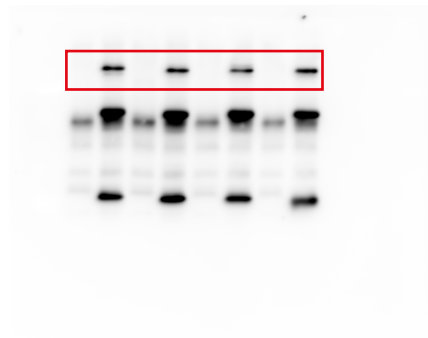

M-a-Golgin-97

Supplement: fig7-figsupp2-data2 [file Figure 7-figure supplement 2-source data 1.pdf › Figure 7-figure supplement 2-uncropped images/Figure 7-figure supplement 2-source data 1.pdf]
